# Supplementary material
Source: PubMed Central journal article supplement (PMC3083920)
Supplement: NIHMS277161-supplement-SuppInfo.pdf [file NIHMS277161-supplement-SuppInfo.pdf]

# A Theoretical Investigation of the Mechanism of Hydrovinylation Reaction

*Jorly Joseph,<sup>±‡</sup> T. V. RajanBabu,<sup>\*+</sup> and Eluvathingal D. Jemmis<sup>\*‡,†</sup>*

<sup>±</sup> School of Chemistry, University of Hyderabad, Central University (P. O.), Hyderabad-500046, India,

<sup>‡</sup>Department of Inorganic and Physical Chemistry, Indian Institute of Science, Bangalore-560012, India,

<sup>†</sup> Indian Institute of Science Education and Research, Thiruvananthapuram, 695016, India,

<sup>+</sup> Department of Chemistry, The Ohio State University, Columbus, OH 43210.

[jemmis@iisertvm.ac.in](mailto:jemmis@iisertvm.ac.in), [rajanbabu.1@osu.edu](mailto:rajanbabu.1@osu.edu)

## Supporting Information

**Scheme S1.** Coordinating Ability of Olefins versus H<sub>2</sub>O

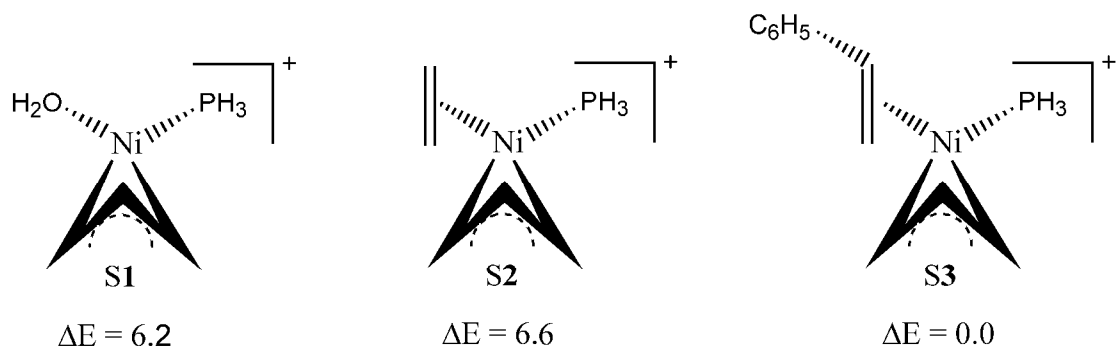

**Scheme S2.** Reaction Path for the Lowest Allyl Olefin Complex Formation

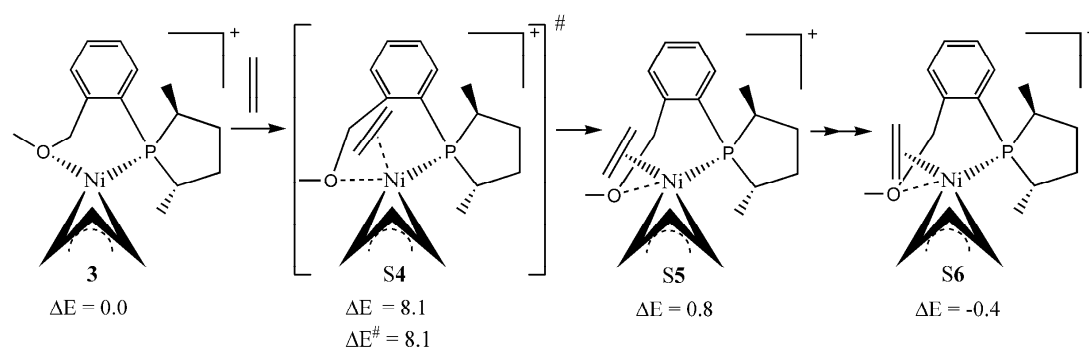

**Scheme S3.** Initiation from **3** (with fewer steps)

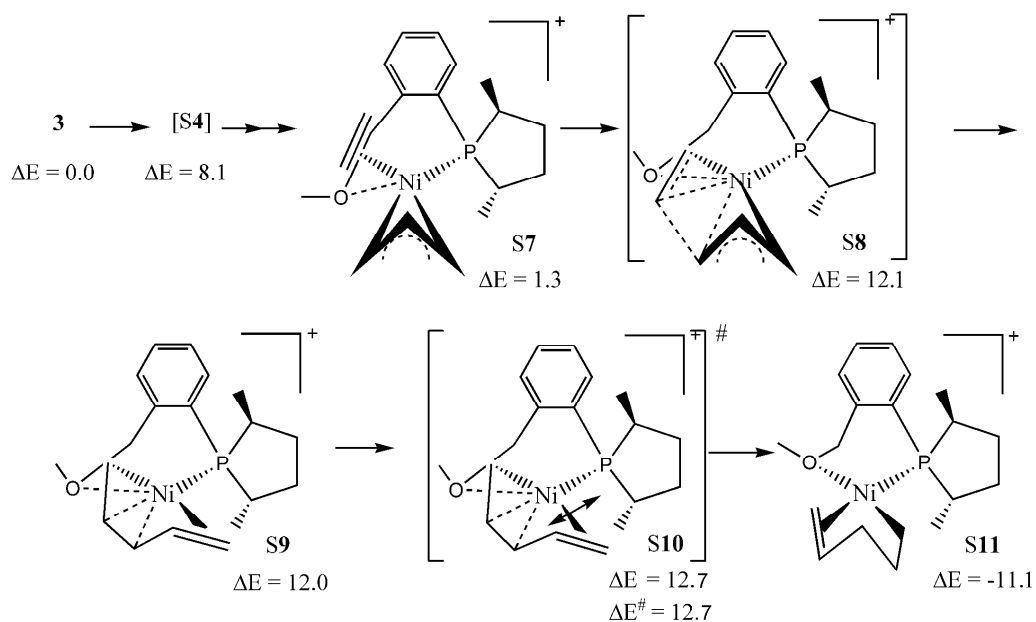

**Scheme S4.** Comparison of Styrene and Ethene for Initiation in Model Systems

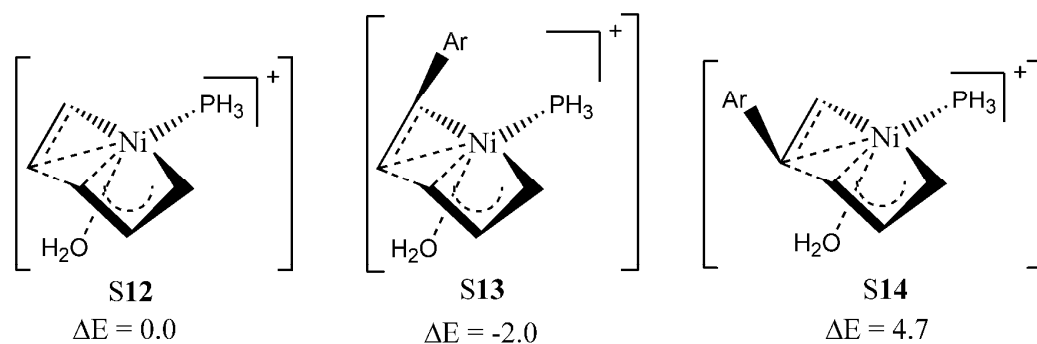

**Scheme S5.** Lowest  $\beta$ -H Transfer Transition States for Model Systems

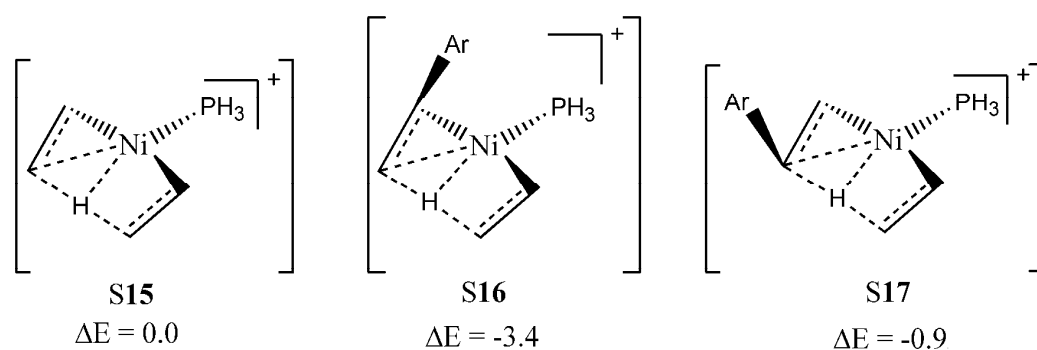

**Scheme S6.** Lowest Second H-Transfer Transition States (**S19R**, **S19S**, **S20R**, **S20S**)

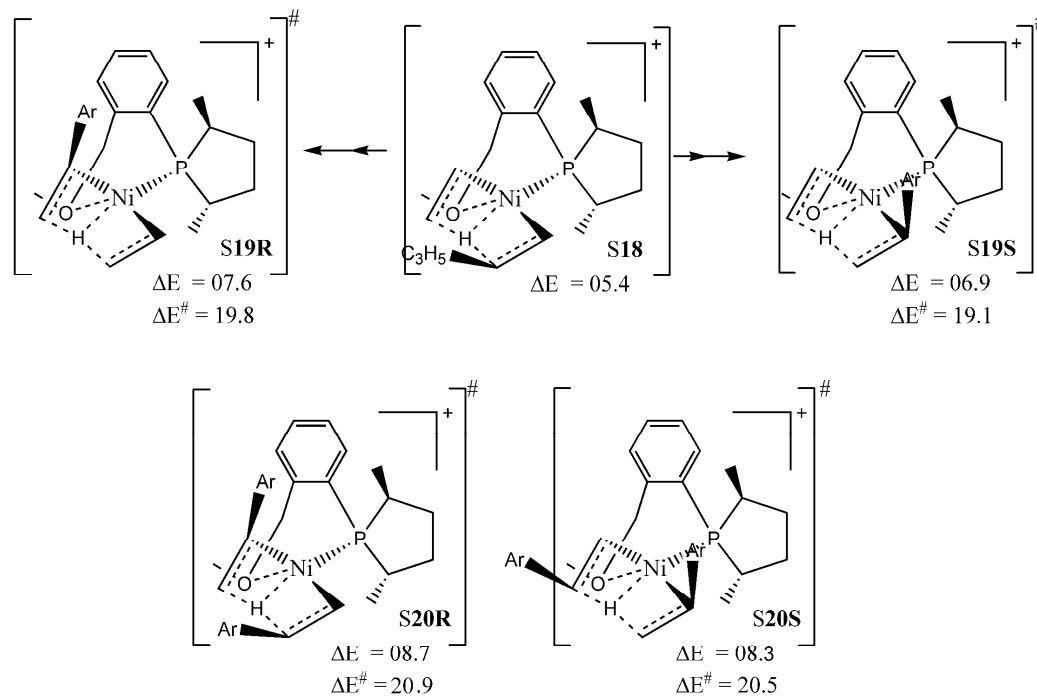

**Scheme S7.** Lowest Tetrahedral Transition States for Cis-Trans Interconversion of  $\eta^3$ -Benzyl

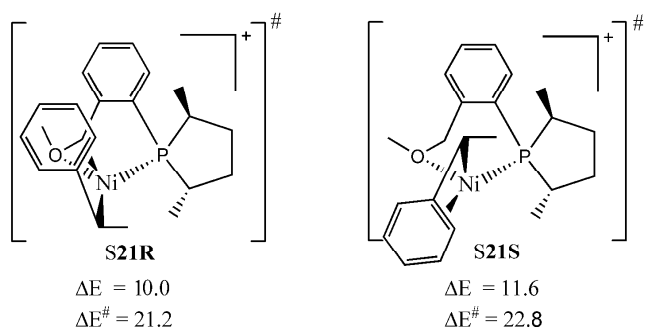

**Scheme S8.** Rate Determining Transition States for Product Elimination via  $\beta$ -hydride Pathway

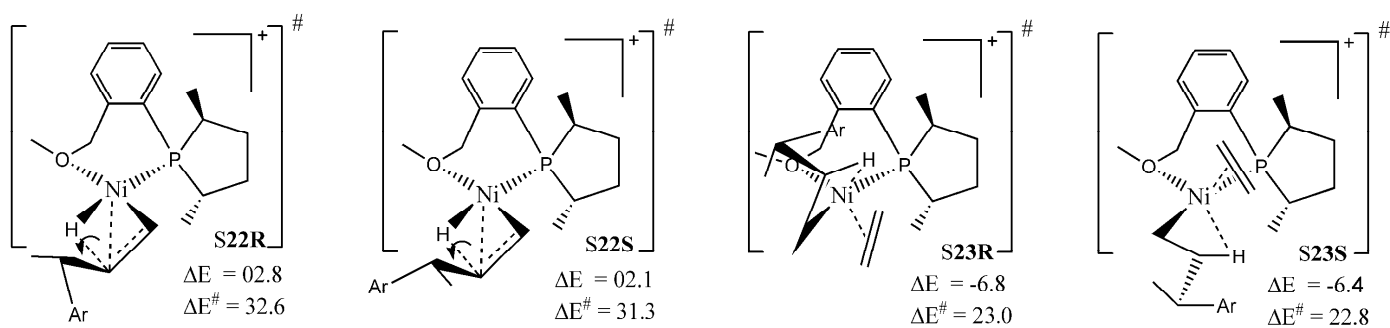

**Scheme S9.** Reaction Path to Reach the  $\beta$ -H-Transfer Transition States for (**R**) Product

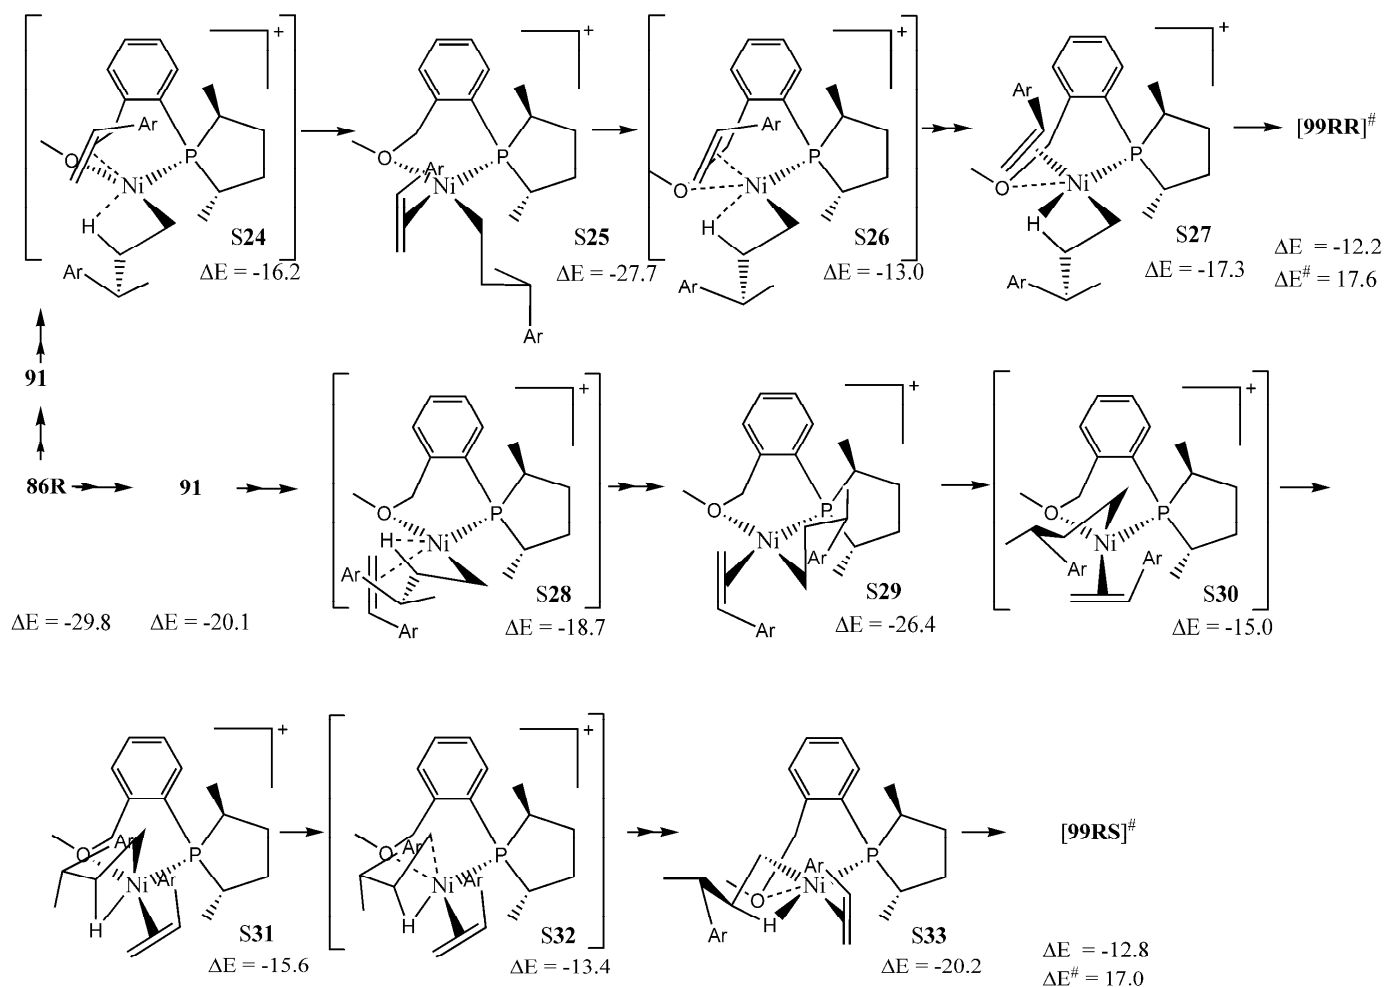

**Scheme S10.** Reaction Path to Reach the  $\beta$ -H-Transfer Transition States for (S) Product

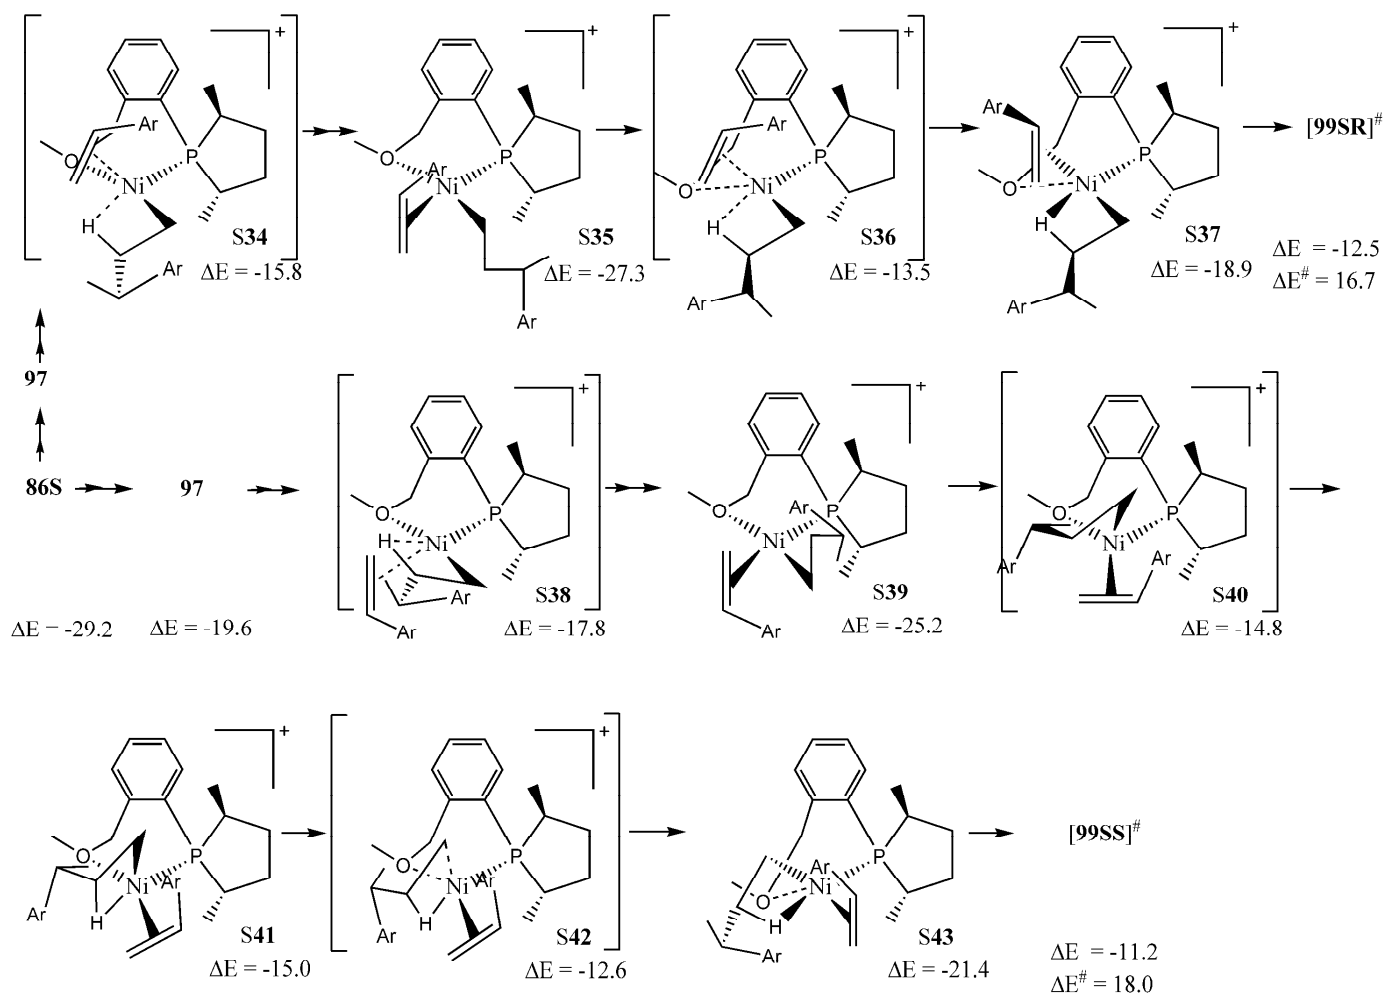

**Scheme S11.** Reaction Path to Reach **(R)**  $\eta^3$ -Benzylic from the  $\beta$ -H-Transfer Transition States

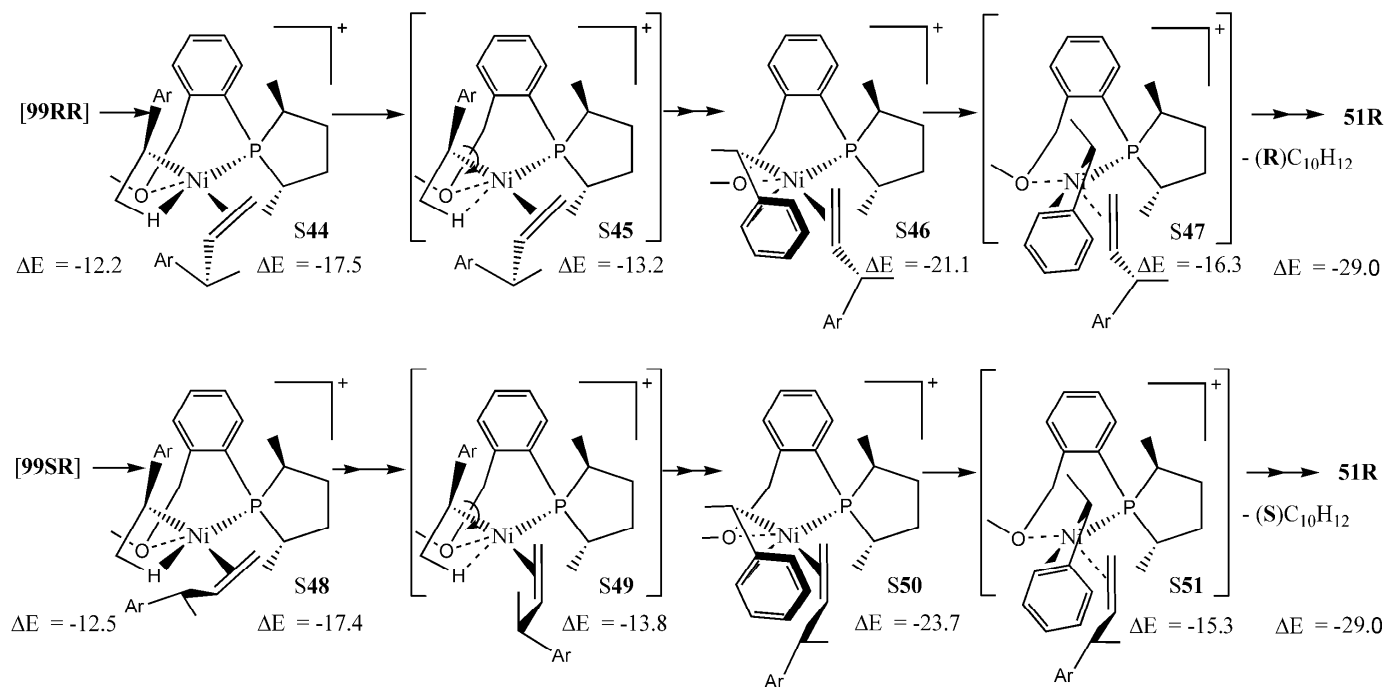

**Scheme S12.** Reaction Path to Reach **(S)**  $\eta^3$ -Benzylic from the  $\beta$ -H-Transfer Transition States

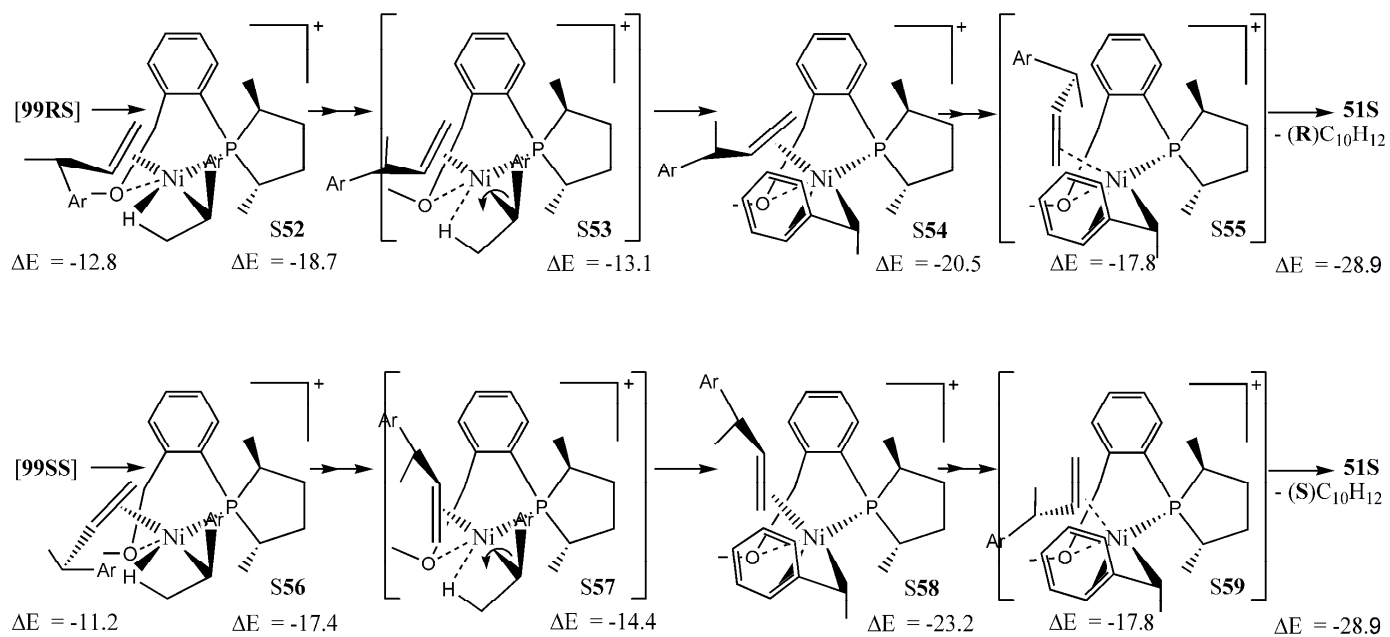

## Gaussian Reference

Gaussian 03, Revision B.03, M. J. Frisch, G. W. Trucks, H. B. Schlegel, G. E. Scuseria, M. A. Robb, J. R. Cheeseman, J. A. Montgomery, Jr., T. Vreven, K. N. Kudin, J. C. Burant, J. M. Millam, S. S. Iyengar, J. Tomasi, V. Barone, B. Mennucci, M. Cossi, G. Scalmani, N. Rega, G. A. Petersson, H. Nakatsuji, M. Hada, M. Ehara, K. Toyota, R. Fukuda, J. Hasegawa, M. Ishida, T. Nakajima, Y. Honda, O. Kitao, H. Nakai, M. Klene, X. Li, J. E. Knox, H. P. Hratchian, J. B. Cross, C. Adamo, J. Jaramillo, R. Gomperts, R. E. Stratmann, O. Yazyev, A. J. Austin, R. Cammi, C. Pomelli, J. W. Ochterski, P. Y. Ayala, K. Morokuma, G. A. Voth, P. Salvador, J. J. Dannenberg, V. G. Zakrzewski, S. Dapprich, A. D. Daniels, M. C. Strain, O. Farkas, D. K. Malick, A. D. Rabuck, K. Raghavachari, J. B. Foresman, J. V. Ortiz, Q. Cui, A. G. Baboul, S. Clifford, J. Cioslowski, B. B. Stefanov, G. Liu, A. Liashenko, P. Piskorz, I. Komaromi, R. L. Martin, D. J. Fox, T. Keith, M. A. Al-Laham, C. Y. Peng, A. Nanayakkara, M. Challacombe, P. M. W. Gill, B. Johnson, W. Chen, M. W. Wong, C. Gonzalez, and J. A. Pople, Gaussian, Inc., Pittsburgh PA, 2003.

Gaussian 03, Revision B.05, M. J. Frisch, G. W. Trucks, H. B. Schlegel, G. E. Scuseria, M. A. Robb, J. R. Cheeseman, J. A. Montgomery, Jr., T. Vreven, K. N. Kudin, J. C. Burant, J. M. Millam, S. S. Iyengar, J. Tomasi, V. Barone, B. Mennucci, M. Cossi, G. Scalmani, N. Rega, G. A. Petersson, H. Nakatsuji, M. Hada, M. Ehara, K. Toyota, R. Fukuda, J. Hasegawa, M. Ishida, T. Nakajima, Y. Honda, O. Kitao, H. Nakai, M. Klene, X. Li, J. E. Knox, H. P. Hratchian, J. B. Cross, C. Adamo, J. Jaramillo, R. Gomperts, R. E. Stratmann, O. Yazyev, A. J. Austin, R. Cammi, C. Pomelli, J. W. Ochterski, P. Y. Ayala, K. Morokuma, G. A. Voth, P. Salvador, J. J. Dannenberg, V. G. Zakrzewski, S. Dapprich, A. D. Daniels, M. C. Strain, O. Farkas, D. K. Malick, A. D. Rabuck, K. Raghavachari, J. B. Foresman, J. V. Ortiz, Q. Cui, A. G. Baboul, S. Clifford, J. Cioslowski, B. B. Stefanov, G. Liu, A. Liashenko, P. Piskorz, I. Komaromi, R. L. Martin, D. J. Fox, T. Keith, M. A. Al-Laham, C. Y. Peng, A. Nanayakkara, M. Challacombe, P. M. W. Gill, B. Johnson, W. Chen, M. W. Wong, C. Gonzalez, and J. A. Pople, Gaussian, Inc., Pittsburgh PA, 2003.



Gaussian 03, Revision C.02, M. J. Frisch, G. W. Trucks, H. B. Schlegel, G. E. Scuseria, M. A. Robb, J. R. Cheeseman, J. A. Montgomery, Jr., T. Vreven, K. N. Kudin, J. C. Burant, J. M. Millam, S. S. Iyengar, J. Tomasi, V. Barone, B. Mennucci, M. Cossi, G. Scalmani, N. Rega, G. A. Petersson, H. Nakatsuji, M. Hada, M. Ehara, K. Toyota, R. Fukuda, J. Hasegawa, M. Ishida, T. Nakajima, Y. Honda, O. Kitao, H. Nakai, M. Klene, X. Li, J. E. Knox, H. P. Hratchian, J. B. Cross, C. Adamo, J. Jaramillo, R. Gomperts, R. E. Stratmann, O. Yazyev, A. J. Austin, R. Cammi, C. Pomelli, J. W. Ochterski, P. Y. Ayala, K. Morokuma, G. A. Voth, P. Salvador, J. J. Dannenberg, V. G. Zakrzewski, S. Dapprich, A. D. Daniels, M. C. Strain, O. Farkas, D. K. Malick, A. D. Rabuck, K. Raghavachari, J. B. Foresman, J. V. Ortiz, Q. Cui, A. G. Baboul, S. Clifford, J. Cioslowski, B. B. Stefanov, G. Liu, A. Liashenko, P. Piskorz, I. Komaromi, R. L. Martin, D. J. Fox, T. Keith, M. A. Al-Laham, C. Y. Peng, A. Nanayakkara, M. Challacombe, P. M. W. Gill, B. Johnson, W. Chen, M. W. Wong, C. Gonzalez, and J. A. Pople, Gaussian, Inc., Wallingford CT, 2004.

Gaussian 03, Revision D.01, M. J. Frisch, G. W. Trucks, H. B. Schlegel, G. E. Scuseria, M. A. Robb, J. R. Cheeseman, J. A. Montgomery, Jr., T. Vreven, K. N. Kudin, J. C. Burant, J. M. Millam, S. S. Iyengar, J. Tomasi, V. Barone, B. Mennucci, M. Cossi, G. Scalmani, N. Rega, G. A. Petersson, H. Nakatsuji, M. Hada, M. Ehara, K. Toyota, R. Fukuda, J. Hasegawa, M. Ishida, T. Nakajima, Y. Honda, O. Kitao, H. Nakai, M. Klene, X. Li, J. E. Knox, H. P. Hratchian, J. B. Cross, V. Bakken, C. Adamo, J. Jaramillo, R. Gomperts, R. E. Stratmann, O. Yazyev, A. J. Austin, R. Cammi, C. Pomelli, J. W. Ochterski, P. Y. Ayala, K. Morokuma, G. A. Voth, P. Salvador, J. J. Dannenberg, V. G. Zakrzewski, S. Dapprich, A. D. Daniels, M. C. Strain, O. Farkas, D. K. Malick, A. D. Rabuck, K. Raghavachari, J. B. Foresman, J. V. Ortiz, Q. Cui, A. G. Baboul, S. Clifford, J. Cioslowski, B. B. Stefanov, G. Liu, A. Liashenko, P. Piskorz, I. Komaromi, R. L. Martin, D. J. Fox, T. Keith, M. A. Al-Laham, C. Y. Peng, A. Nanayakkara, M. Challacombe, P. M. W. Gill, B. Johnson, W. Chen, M. W. Wong, C. Gonzalez, and J. A. Pople, Gaussian, Inc., Wallingford CT, 2004.

## Coordinates of Structures (in Å) and their Energies (E + ZPE, in Hartree).

|                        |              |              |              |                        |              |              |              |
|------------------------|--------------|--------------|--------------|------------------------|--------------|--------------|--------------|
| <b>H<sub>2</sub>O</b>  |              |              |              | 28                     | -1.608193000 | 0.218885000  | 0.301528000  |
| E + ZPE = -76.387789   |              |              |              | 15                     | 0.459774000  | 0.904826000  | 0.140416000  |
| .....                  |              |              |              | 6                      | 0.737391000  | 2.172303000  | -1.218948000 |
| <b>Ethene</b>          |              |              |              | 1                      | 0.956870000  | 1.631917000  | -2.143353000 |
| E + ZPE = -78.536227   |              |              |              | 6                      | 1.930016000  | 3.079014000  | -0.775111000 |
| .....                  |              |              |              | 1                      | 2.735240000  | 3.061046000  | -1.518442000 |
| <b>Styrene</b>         |              |              |              | 1                      | 1.577616000  | 4.116403000  | -0.730076000 |
| E + ZPE = -309.514550  |              |              |              | 6                      | 2.458026000  | 2.656723000  | 0.613456000  |
| .....                  |              |              |              | 1                      | 2.877591000  | 3.511514000  | 1.159305000  |
| <b>1,4.pentadiene</b>  |              |              |              | 1                      | 3.267297000  | 1.922821000  | 0.510152000  |
| E + ZPE = -195.183875  |              |              |              | 6                      | 1.304367000  | 2.013517000  | 1.401656000  |
| .....                  |              |              |              | 1                      | 0.544457000  | 2.783501000  | 1.602301000  |
| 6                      | -2.375929000 | -0.175981000 | -0.148843000 | 6                      | 1.735182000  | 1.391831000  | 2.729003000  |
| 6                      | -1.176768000 | -0.177866000 | 0.433773000  | 1                      | 2.451259000  | 0.576705000  | 2.574602000  |
| 1                      | -3.185533000 | -0.809109000 | 0.204450000  | 1                      | 0.881537000  | 1.000478000  | 3.291805000  |
| 1                      | -0.993196000 | -0.838057000 | 1.282303000  | 1                      | 2.225533000  | 2.145054000  | 3.358006000  |
| 1                      | -2.596261000 | 0.463932000  | -1.001410000 | 6                      | -0.543147000 | 2.991831000  | -1.455134000 |
| 6                      | -0.000010000 | 0.663904000  | -0.000758000 | 1                      | -0.878018000 | 3.489419000  | -0.536066000 |
| 1                      | -0.313885000 | 1.316544000  | -0.828063000 | 1                      | -1.352586000 | 2.356899000  | -1.822660000 |
| 1                      | 0.313748000  | 1.319415000  | 0.824102000  | 1                      | -0.347506000 | 3.772577000  | -2.200901000 |
| 6                      | 1.176630000  | -0.179206000 | -0.432944000 | 6                      | 1.683984000  | -0.460098000 | -0.151969000 |
| 1                      | 0.992635000  | -0.841460000 | -1.279760000 | 6                      | 2.659567000  | -0.340611000 | -1.152473000 |
| 6                      | 2.376073000  | -0.175634000 | 0.149076000  | 1                      | 2.705411000  | 0.554947000  | -1.761169000 |
| 1                      | 2.596797000  | 0.466740000  | 0.999688000  | 6                      | 3.587254000  | -1.353490000 | -1.401470000 |
| 1                      | 3.185717000  | -0.809313000 | -0.203135000 | 1                      | 4.326965000  | -1.225290000 | -2.187022000 |
| .....                  |              |              |              | 6                      | 3.555865000  | -2.519009000 | -0.643255000 |
| <b>Product</b>         |              |              |              | 1                      | 4.270037000  | -3.317463000 | -0.824613000 |
| E + ZPE = -388.079004  |              |              |              | 6                      | 2.590160000  | -2.655268000 | 0.353427000  |
| .....                  |              |              |              | 1                      | 2.559211000  | -3.566514000 | 0.946597000  |
| 1                      | 1.758146000  | -0.269689000 | 1.913402000  | 6                      | 1.648763000  | -1.652640000 | 0.613943000  |
| 6                      | 1.267925000  | -0.694327000 | -0.176440000 | 6                      | 0.633800000  | -1.913872000 | 1.717981000  |
| 6                      | 1.780803000  | -1.112050000 | 1.213113000  | 1                      | 0.571808000  | -1.070239000 | 2.408741000  |
| 1                      | 1.150180000  | -1.905493000 | 1.626633000  | 1                      | 0.962427000  | -2.791663000 | 2.296226000  |
| 1                      | 2.809581000  | -1.485175000 | 1.158094000  | 8                      | -0.702212000 | -2.112793000 | 1.272113000  |
| 1                      | 1.306635000  | -1.585863000 | -0.821774000 | 6                      | -0.883790000 | -3.278124000 | 0.475558000  |
| 6                      | -0.199218000 | -0.268844000 | -0.112534000 | 1                      | -0.581438000 | -4.178543000 | 1.032488000  |
| 6                      | -0.563124000 | 0.999498000  | 0.360778000  | 1                      | -1.948785000 | -3.330677000 | 0.243903000  |
| 6                      | -1.215115000 | -1.153866000 | -0.493955000 | 1                      | -0.324882000 | -3.216718000 | -0.464056000 |
| 1                      | 0.214457000  | 1.703145000  | 0.647493000  | 6                      | -1.949105000 | 0.711207000  | 2.181123000  |
| 1                      | -0.950337000 | -2.141353000 | -0.867028000 | 1                      | -1.582548000 | 1.628512000  | 2.636907000  |
| 6                      | -1.904897000 | 1.369340000  | 0.454889000  | 6                      | -3.142511000 | 0.786688000  | 1.415553000  |
| 6                      | -2.559296000 | -0.787924000 | -0.402052000 | 6                      | -3.504492000 | -0.345069000 | 0.672097000  |
| 1                      | -2.166949000 | 2.358327000  | 0.822505000  | 1                      | -3.350558000 | -1.344830000 | 1.073417000  |
| 1                      | -3.331913000 | -1.489831000 | -0.705661000 | 1                      | -3.566988000 | 1.758956000  | 1.165797000  |
| 6                      | -2.908786000 | 0.476365000  | 0.073799000  | 1                      | -4.270501000 | -0.261421000 | -0.091322000 |
| 1                      | -3.954114000 | 0.765420000  | 0.143804000  | 1                      | -1.744868000 | -0.190633000 | 2.758079000  |
| 6                      | 3.198419000  | 0.965210000  | -0.358981000 | 35                     | -1.606345000 | -0.580720000 | -1.878777000 |
| 6                      | 2.113735000  | 0.365107000  | -0.852102000 | .....                  |              |              |              |
| 1                      | 1.766989000  | 0.647636000  | -1.847064000 | <b>2'</b>              |              |              |              |
| 1                      | 3.598914000  | 0.737534000  | 0.625001000  | E + ZPE = -5159.572478 |              |              |              |
| 1                      | 3.735736000  | 1.714292000  | -0.934501000 | .....                  |              |              |              |
| .....                  |              |              |              | 28                     | -1.621880000 | 0.186841000  | 0.285368000  |
| <b>2</b>               |              |              |              | 15                     | 0.434100000  | 0.909462000  | 0.140633000  |
| E + ZPE = -5159.573447 |              |              |              | 6                      | 0.664883000  | 2.178522000  | -1.229407000 |
| .....                  |              |              |              | 1                      | 0.912995000  | 1.638768000  | -2.146880000 |
| <b>2</b>               |              |              |              | 6                      | 1.816282000  | 3.137767000  | -0.789069000 |
| E + ZPE = -5159.573447 |              |              |              | 1                      | 2.618293000  | 3.158221000  | -1.535819000 |

|    |              |              |              |
|----|--------------|--------------|--------------|
| 1  | 1.416760000  | 4.157832000  | -0.739676000 |
| 6  | 2.367296000  | 2.737216000  | 0.595864000  |
| 1  | 2.760926000  | 3.606918000  | 1.137528000  |
| 1  | 3.200388000  | 2.030932000  | 0.488719000  |
| 6  | 1.241263000  | 2.056574000  | 1.392737000  |
| 1  | 0.452682000  | 2.796812000  | 1.593839000  |
| 6  | 1.706484000  | 1.464040000  | 2.722025000  |
| 1  | 2.450192000  | 0.674013000  | 2.568583000  |
| 1  | 0.874336000  | 1.047755000  | 3.299508000  |
| 1  | 2.175354000  | 2.241467000  | 3.337813000  |
| 6  | -0.644492000 | 2.943767000  | -1.489247000 |
| 1  | -1.006101000 | 3.445520000  | -0.582996000 |
| 1  | -1.426161000 | 2.272058000  | -1.852032000 |
| 1  | -0.472369000 | 3.717256000  | -2.248225000 |
| 6  | 1.700710000  | -0.418536000 | -0.149408000 |
| 6  | 2.654916000  | -0.278603000 | -1.167594000 |
| 1  | 2.662061000  | 0.612321000  | -1.784533000 |
| 6  | 3.609358000  | -1.264433000 | -1.423693000 |
| 1  | 4.330781000  | -1.121000000 | -2.223476000 |
| 6  | 3.626836000  | -2.422740000 | -0.654335000 |
| 1  | 4.361243000  | -3.201286000 | -0.841422000 |
| 6  | 2.685404000  | -2.577112000 | 0.362759000  |
| 1  | 2.695932000  | -3.481749000 | 0.966610000  |
| 6  | 1.718327000  | -1.601634000 | 0.632413000  |
| 6  | 0.744297000  | -1.878441000 | 1.770287000  |
| 1  | 0.681878000  | -1.027301000 | 2.451717000  |
| 1  | 1.119483000  | -2.737875000 | 2.348489000  |
| 8  | -0.599218000 | -2.120629000 | 1.377110000  |
| 6  | -0.785077000 | -3.303902000 | 0.610328000  |
| 1  | -0.435277000 | -4.187211000 | 1.167612000  |
| 1  | -1.858647000 | -3.383952000 | 0.431657000  |
| 1  | -0.272631000 | -3.246581000 | -0.355874000 |
| 6  | -3.610923000 | -0.086913000 | 0.458127000  |
| 1  | -4.059705000 | -1.038174000 | 0.191257000  |
| 6  | -2.994025000 | 0.058704000  | 1.707665000  |
| 6  | -2.155667000 | 1.187846000  | 1.899514000  |
| 1  | -2.491956000 | 2.167876000  | 1.553837000  |
| 1  | -2.873419000 | -0.811337000 | 2.350649000  |
| 1  | -1.558790000 | 1.227259000  | 2.808053000  |
| 1  | -4.000760000 | 0.774538000  | -0.081791000 |
| 35 | -1.561081000 | -0.709551000 | -1.854675000 |

**3**  
E + ZPE = -2587.621090

|    |              |              |              |
|----|--------------|--------------|--------------|
| 28 | 1.634207000  | -0.685595000 | -0.179177000 |
| 15 | -0.036080000 | 0.751887000  | -0.022276000 |
| 6  | 0.029829000  | 1.898183000  | 1.471476000  |
| 1  | -0.982807000 | 1.909776000  | 1.889835000  |
| 6  | 0.325865000  | 3.286839000  | 0.860958000  |
| 1  | 0.049139000  | 4.078385000  | 1.566199000  |
| 1  | 1.404611000  | 3.387859000  | 0.679538000  |
| 6  | -0.437294000 | 3.403332000  | -0.465681000 |
| 1  | -0.150001000 | 4.300650000  | -1.025292000 |
| 1  | -1.516199000 | 3.481674000  | -0.275744000 |
| 6  | -0.144640000 | 2.133919000  | -1.296974000 |
| 1  | 0.878213000  | 2.211626000  | -1.685894000 |
| 6  | -1.093253000 | 1.890262000  | -2.472952000 |
| 1  | -2.130602000 | 1.777533000  | -2.143472000 |
| 1  | -0.819260000 | 0.994359000  | -3.041578000 |
| 1  | -1.051384000 | 2.740730000  | -3.162320000 |
| 6  | 0.999543000  | 1.464245000  | 2.574049000  |
| 1  | 2.029425000  | 1.402762000  | 2.206027000  |

|   |              |              |              |
|---|--------------|--------------|--------------|
| 1 | 0.727416000  | 0.489396000  | 2.993931000  |
| 1 | 0.984196000  | 2.190148000  | 3.394763000  |
| 6 | -1.671352000 | -0.097319000 | 0.048729000  |
| 6 | -2.820479000 | 0.589773000  | 0.472196000  |
| 1 | -2.758049000 | 1.636778000  | 0.751347000  |
| 6 | -4.064042000 | -0.039661000 | 0.534266000  |
| 1 | -4.936228000 | 0.519905000  | 0.858439000  |
| 6 | -4.177581000 | -1.383271000 | 0.184343000  |
| 1 | -5.137738000 | -1.887050000 | 0.238338000  |
| 6 | -3.045724000 | -2.082660000 | -0.232586000 |
| 1 | -3.135338000 | -3.131456000 | -0.504269000 |
| 6 | -1.796196000 | -1.458026000 | -0.318577000 |
| 6 | -0.639446000 | -2.273508000 | -0.848430000 |
| 1 | -0.273963000 | -1.899583000 | -1.809318000 |
| 1 | -0.941743000 | -3.315883000 | -0.990703000 |
| 8 | 0.538712000  | -2.277742000 | 0.001555000  |
| 6 | 0.349367000  | -2.902480000 | 1.288433000  |
| 1 | -0.079072000 | -3.898391000 | 1.140785000  |
| 1 | 1.337234000  | -2.990085000 | 1.740801000  |
| 1 | -0.308992000 | -2.299571000 | 1.920917000  |
| 6 | 2.983685000  | 0.634960000  | -0.660435000 |
| 1 | 3.073456000  | 1.605052000  | -0.178330000 |
| 6 | 3.619016000  | -0.479333000 | -0.046956000 |
| 6 | 3.322776000  | -1.742450000 | -0.559261000 |
| 1 | 3.200650000  | -1.896057000 | -1.632363000 |
| 1 | 4.028670000  | -0.385722000 | 0.958293000  |
| 1 | 3.595124000  | -2.630200000 | 0.004279000  |
| 1 | 2.946495000  | 0.690827000  | -1.751136000 |

**3'**  
E + ZPE = -2587.620467

|    |              |              |              |
|----|--------------|--------------|--------------|
| 28 | 1.650244000  | -0.654724000 | -0.200927000 |
| 15 | -0.053113000 | 0.753060000  | -0.021920000 |
| 6  | 0.002315000  | 1.855224000  | 1.504867000  |
| 1  | -1.024073000 | 1.886597000  | 1.888669000  |
| 6  | 0.349447000  | 3.247502000  | 0.932381000  |
| 1  | 0.108741000  | 4.028699000  | 1.662020000  |
| 1  | 1.429416000  | 3.311232000  | 0.742045000  |
| 6  | -0.425198000 | 3.426063000  | -0.380540000 |
| 1  | -0.118518000 | 4.330999000  | -0.916978000 |
| 1  | -1.498469000 | 3.530625000  | -0.171939000 |
| 6  | -0.182796000 | 2.174612000  | -1.254078000 |
| 1  | 0.826891000  | 2.245169000  | -1.675564000 |
| 6  | -1.171561000 | 1.978548000  | -2.405257000 |
| 1  | -2.201269000 | 1.882355000  | -2.048147000 |
| 1  | -0.935166000 | 1.088484000  | -2.999088000 |
| 1  | -1.129539000 | 2.842656000  | -3.077440000 |
| 6  | 0.918737000  | 1.371099000  | 2.631266000  |
| 1  | 1.959041000  | 1.287183000  | 2.300767000  |
| 1  | 0.603738000  | 0.396432000  | 3.020936000  |
| 1  | 0.893102000  | 2.079746000  | 3.466599000  |
| 6  | -1.674870000 | -0.120930000 | 0.025593000  |
| 6  | -2.839166000 | 0.552003000  | 0.430323000  |
| 1  | -2.793244000 | 1.599912000  | 0.710144000  |
| 6  | -4.075196000 | -0.093292000 | 0.471882000  |
| 1  | -4.959978000 | 0.454728000  | 0.781289000  |
| 6  | -4.165410000 | -1.438316000 | 0.119618000  |
| 1  | -5.119959000 | -1.954120000 | 0.156962000  |
| 6  | -3.017956000 | -2.123519000 | -0.277584000 |
| 1  | -3.089504000 | -3.173506000 | -0.550077000 |
| 6  | -1.775229000 | -1.482882000 | -0.342904000 |
| 6  | -0.598855000 | -2.282153000 | -0.853921000 |

|   |              |              |              |
|---|--------------|--------------|--------------|
| 1 | -0.232855000 | -1.909494000 | -1.815091000 |
| 1 | -0.881032000 | -3.331151000 | -0.989387000 |
| 8 | 0.570218000  | -2.257146000 | 0.006689000  |
| 6 | 0.385209000  | -2.879637000 | 1.294649000  |
| 1 | -0.004830000 | -3.891269000 | 1.148145000  |
| 1 | 1.369122000  | -2.928429000 | 1.760858000  |
| 1 | -0.303865000 | -2.297726000 | 1.913980000  |
| 6 | 3.419896000  | -1.634740000 | -0.030141000 |
| 1 | 3.543363000  | -2.654126000 | -0.383884000 |
| 6 | 3.498184000  | -0.576356000 | -0.935000000 |
| 6 | 3.034164000  | 0.692090000  | -0.484585000 |
| 1 | 3.352826000  | 1.051091000  | 0.495059000  |
| 1 | 3.583785000  | -0.780787000 | -2.001804000 |
| 1 | 2.924015000  | 1.481074000  | -1.223990000 |
| 1 | 3.636087000  | -1.474720000 | 1.027758000  |

**5**  
E + ZPE = -5005.807538

|    |              |              |              |
|----|--------------|--------------|--------------|
| 28 | 1.605525000  | 0.093891000  | -0.472560000 |
| 15 | -0.447321000 | 0.697942000  | 0.041811000  |
| 6  | -0.722050000 | 1.476967000  | 1.744273000  |
| 1  | -1.422644000 | 0.818497000  | 2.269739000  |
| 6  | -1.399469000 | 2.846002000  | 1.474867000  |
| 1  | -2.031006000 | 3.136898000  | 2.322943000  |
| 1  | -0.617856000 | 3.613310000  | 1.387017000  |
| 6  | -2.185223000 | 2.785327000  | 0.158447000  |
| 1  | -2.502010000 | 3.782947000  | -0.172298000 |
| 1  | -3.097595000 | 2.186344000  | 0.277267000  |
| 6  | -1.261484000 | 2.125208000  | -0.878040000 |
| 1  | -0.430161000 | 2.817556000  | -1.070595000 |
| 6  | -1.922406000 | 1.764762000  | -2.208181000 |
| 1  | -2.760700000 | 1.076010000  | -2.061644000 |
| 1  | -1.214444000 | 1.288988000  | -2.895758000 |
| 1  | -2.308259000 | 2.666749000  | -2.698716000 |
| 6  | 0.544888000  | 1.602322000  | 2.597956000  |
| 1  | 1.315880000  | 2.187854000  | 2.081764000  |
| 1  | 0.970023000  | 0.622667000  | 2.825240000  |
| 1  | 0.307837000  | 2.115806000  | 3.538469000  |
| 6  | -1.655155000 | -0.685960000 | -0.107854000 |
| 6  | -2.890102000 | -0.720667000 | 0.558699000  |
| 1  | -3.171356000 | 0.074314000  | 1.242105000  |
| 6  | -3.777551000 | -1.780089000 | 0.363518000  |
| 1  | -4.726589000 | -1.790660000 | 0.892955000  |
| 6  | -3.445686000 | -2.822677000 | -0.502279000 |
| 1  | -4.135024000 | -3.649532000 | -0.650456000 |
| 6  | -2.220070000 | -2.802522000 | -1.168934000 |
| 1  | -1.946599000 | -3.616026000 | -1.835251000 |
| 6  | -1.332684000 | -1.745528000 | -0.970684000 |
| 1  | -0.370090000 | -1.753996000 | -1.473263000 |
| 35 | 1.727283000  | -1.518911000 | 1.163847000  |
| 6  | 1.761283000  | 1.103431000  | -2.153312000 |
| 1  | 1.407055000  | 2.123239000  | -2.282683000 |
| 6  | 3.040485000  | 0.913050000  | -1.568445000 |
| 6  | 3.406849000  | -0.395478000 | -1.228817000 |
| 1  | 3.143660000  | -1.234770000 | -1.871700000 |
| 1  | 3.552652000  | 1.755489000  | -1.103672000 |
| 1  | 4.257913000  | -0.565166000 | -0.578332000 |
| 1  | 1.429796000  | 0.422372000  | -2.940533000 |

**5'**  
E + ZPE = -5005.807841

|    |              |              |              |
|----|--------------|--------------|--------------|
| 28 | 1.602416000  | 0.063224000  | -0.475886000 |
| 15 | -0.441379000 | 0.694590000  | 0.035593000  |
| 6  | -0.667233000 | 1.460892000  | 1.750850000  |
| 1  | -1.420759000 | 0.847576000  | 2.258116000  |
| 6  | -1.243067000 | 2.877509000  | 1.502067000  |
| 1  | -1.828629000 | 3.212666000  | 2.366675000  |
| 1  | -0.408384000 | 3.584125000  | 1.393791000  |
| 6  | -2.065031000 | 2.874570000  | 0.206790000  |
| 1  | -2.326561000 | 3.891917000  | -0.111920000 |
| 1  | -3.010652000 | 2.334873000  | 0.349200000  |
| 6  | -1.211600000 | 2.164231000  | -0.857287000 |
| 1  | -0.353202000 | 2.812082000  | -1.080136000 |
| 6  | -1.932028000 | 1.837528000  | -2.165231000 |
| 1  | -2.798570000 | 1.191090000  | -1.992851000 |
| 1  | -1.270779000 | 1.325791000  | -2.874173000 |
| 1  | -2.286849000 | 2.757720000  | -2.645294000 |
| 6  | 0.598791000  | 1.475069000  | 2.614783000  |
| 1  | 1.412204000  | 2.019527000  | 2.119020000  |
| 1  | 0.955072000  | 0.463014000  | 2.817844000  |
| 1  | 0.392219000  | 1.977644000  | 3.568285000  |
| 6  | -1.694085000 | -0.647348000 | -0.115637000 |
| 6  | -2.941847000 | -0.628180000 | 0.527563000  |
| 1  | -3.206999000 | 0.185516000  | 1.195580000  |
| 6  | -3.862934000 | -1.657319000 | 0.326711000  |
| 1  | -4.822040000 | -1.627785000 | 0.836968000  |
| 6  | -3.551937000 | -2.721345000 | -0.521082000 |
| 1  | -4.268199000 | -3.524219000 | -0.673688000 |
| 6  | -2.313887000 | -2.753813000 | -1.163802000 |
| 1  | -2.057333000 | -3.584553000 | -1.815397000 |
| 6  | -1.392602000 | -1.727273000 | -0.959810000 |
| 1  | -0.419437000 | -1.773350000 | -1.438472000 |
| 35 | 1.658939000  | -1.660735000 | 1.048453000  |
| 6  | 3.563180000  | -0.131456000 | -0.906495000 |
| 1  | 4.016975000  | -1.110268000 | -1.015498000 |
| 6  | 2.851942000  | 0.427635000  | -1.974080000 |
| 6  | 2.021337000  | 1.545931000  | -1.697736000 |
| 1  | 2.408591000  | 2.357886000  | -1.077307000 |
| 1  | 2.678038000  | -0.163554000 | -2.873206000 |
| 1  | 1.347249000  | 1.880063000  | -2.483008000 |
| 1  | 4.004213000  | 0.499067000  | -0.135086000 |

**6**  
E + ZPE = -5005.778099

|    |              |             |              |
|----|--------------|-------------|--------------|
| 28 | 1.559137000  | 0.123817000 | -0.451202000 |
| 15 | -0.586271000 | 0.634590000 | 0.082397000  |
| 6  | -0.868581000 | 1.415106000 | 1.779441000  |
| 1  | -1.781161000 | 0.960451000 | 2.185010000  |
| 6  | -1.154092000 | 2.902648000 | 1.480492000  |
| 1  | -1.642227000 | 3.383633000 | 2.337110000  |
| 1  | -0.203409000 | 3.430952000 | 1.319498000  |
| 6  | -2.006411000 | 2.980545000 | 0.207434000  |
| 1  | -2.122407000 | 4.012523000 | -0.148086000 |
| 1  | -3.017672000 | 2.600380000 | 0.409556000  |
| 6  | -1.321942000 | 2.102163000 | -0.858284000 |
| 1  | -0.435107000 | 2.645227000 | -1.215104000 |
| 6  | -2.187909000 | 1.759378000 | -2.071579000 |
| 1  | -3.089343000 | 1.210985000 | -1.780555000 |
| 1  | -1.644635000 | 1.141344000 | -2.795310000 |
| 1  | -2.501192000 | 2.676705000 | -2.585259000 |
| 6  | 0.271584000  | 1.185331000 | 2.775492000  |
| 1  | 1.214885000  | 1.605228000 | 2.407272000  |

|    |              |              |              |
|----|--------------|--------------|--------------|
| 1  | 0.441463000  | 0.120463000  | 2.958408000  |
| 1  | 0.039370000  | 1.668011000  | 3.733339000  |
| 6  | -1.811612000 | -0.733824000 | -0.048278000 |
| 6  | -3.136867000 | -0.636304000 | 0.410091000  |
| 1  | -3.487666000 | 0.275017000  | 0.886334000  |
| 6  | -4.022781000 | -1.703031000 | 0.263663000  |
| 1  | -5.043970000 | -1.609490000 | 0.623800000  |
| 6  | -3.598176000 | -2.888299000 | -0.341571000 |
| 1  | -4.287806000 | -3.720964000 | -0.451319000 |
| 6  | -2.285042000 | -3.000517000 | -0.797035000 |
| 1  | -1.942963000 | -3.922421000 | -1.259140000 |
| 6  | -1.398784000 | -1.931766000 | -0.651021000 |
| 1  | -0.371411000 | -2.035601000 | -0.986602000 |
| 35 | 2.263007000  | -1.665931000 | 0.846147000  |
| 6  | 2.575710000  | 1.788854000  | -0.733469000 |
| 1  | 3.222768000  | 2.069033000  | 0.096884000  |
| 6  | 2.984525000  | 0.756659000  | -1.621369000 |
| 6  | 1.888059000  | 0.282381000  | -2.390114000 |
| 1  | 1.196972000  | 0.995073000  | -2.839385000 |
| 1  | 3.921071000  | 0.217960000  | -1.521251000 |
| 1  | 1.971417000  | -0.666749000 | -2.917918000 |
| 1  | 1.929934000  | 2.588153000  | -1.098072000 |

7  
E + ZPE = -5159.548506

|    |              |              |              |
|----|--------------|--------------|--------------|
| 28 | -1.458792000 | -0.017491000 | 0.636599000  |
| 15 | 0.553154000  | 0.869320000  | 0.191469000  |
| 6  | 0.821281000  | 2.107144000  | -1.212799000 |
| 1  | 1.182059000  | 1.515347000  | -2.058091000 |
| 6  | 1.911356000  | 3.113170000  | -0.724825000 |
| 1  | 2.651901000  | 3.299768000  | -1.511909000 |
| 1  | 1.421141000  | 4.075046000  | -0.528388000 |
| 6  | 2.579612000  | 2.627244000  | 0.573845000  |
| 1  | 3.044721000  | 3.459651000  | 1.118371000  |
| 1  | 3.378185000  | 1.905950000  | 0.358648000  |
| 6  | 1.498336000  | 1.941404000  | 1.422662000  |
| 1  | 0.754852000  | 2.697515000  | 1.717457000  |
| 6  | 2.020479000  | 1.252243000  | 2.682709000  |
| 1  | 2.719470000  | 0.444244000  | 2.437641000  |
| 1  | 1.205140000  | 0.833107000  | 3.283609000  |
| 1  | 2.555782000  | 1.970393000  | 3.316022000  |
| 6  | -0.443458000 | 2.832557000  | -1.690082000 |
| 1  | -0.865559000 | 3.465360000  | -0.901364000 |
| 1  | -1.198605000 | 2.117152000  | -2.024915000 |
| 1  | -0.181819000 | 3.489805000  | -2.529409000 |
| 6  | 1.760543000  | -0.498118000 | -0.185152000 |
| 6  | 2.780588000  | -0.373051000 | -1.139424000 |
| 1  | 2.895734000  | 0.548930000  | -1.697276000 |
| 6  | 3.672992000  | -1.414618000 | -1.402145000 |
| 1  | 4.451053000  | -1.279623000 | -2.148539000 |
| 6  | 3.560972000  | -2.617255000 | -0.711173000 |
| 1  | 4.247029000  | -3.435770000 | -0.909841000 |
| 6  | 2.548550000  | -2.764372000 | 0.236121000  |
| 1  | 2.447766000  | -3.704367000 | 0.774186000  |
| 6  | 1.650944000  | -1.726865000 | 0.508462000  |
| 6  | 0.572713000  | -1.962910000 | 1.541823000  |
| 1  | 0.585767000  | -1.209179000 | 2.331440000  |
| 1  | 0.709693000  | -2.946381000 | 2.009029000  |
| 8  | -0.759576000 | -1.901779000 | 1.004779000  |
| 6  | -1.097090000 | -3.023696000 | 0.167529000  |
| 1  | -0.886018000 | -3.945071000 | 0.725024000  |
| 1  | -2.159352000 | -2.940856000 | -0.050282000 |

|    |              |              |              |
|----|--------------|--------------|--------------|
| 1  | -0.536270000 | -2.991773000 | -0.768105000 |
| 6  | -2.323540000 | 1.702961000  | 1.019229000  |
| 1  | -2.467626000 | 2.420966000  | 0.218136000  |
| 6  | -3.265078000 | 0.636618000  | 1.125803000  |
| 6  | -2.932489000 | -0.377949000 | 2.022501000  |
| 1  | -2.452631000 | -0.148967000 | 2.973030000  |
| 1  | -4.000177000 | 0.468965000  | 0.343946000  |
| 1  | -3.463898000 | -1.325589000 | 1.983484000  |
| 1  | -1.912333000 | 2.128183000  | 1.936528000  |
| 35 | -1.925737000 | -0.485019000 | -1.844114000 |

8  
E + ZPE = -5321.729045

|    |              |              |              |
|----|--------------|--------------|--------------|
| 28 | -0.887612000 | -0.868636000 | -0.912077000 |
| 15 | 1.036368000  | -0.717008000 | 0.169250000  |
| 6  | 1.104072000  | -1.383450000 | 1.934922000  |
| 1  | 1.114097000  | -0.512916000 | 2.596460000  |
| 6  | 2.446655000  | -2.162654000 | 2.050567000  |
| 1  | 2.890145000  | -2.021802000 | 3.042392000  |
| 1  | 2.234840000  | -3.235056000 | 1.951515000  |
| 6  | 3.404025000  | -1.741671000 | 0.928129000  |
| 1  | 4.227955000  | -2.456057000 | 0.812837000  |
| 1  | 3.858406000  | -0.765371000 | 1.143215000  |
| 6  | 2.577540000  | -1.652583000 | -0.367840000 |
| 1  | 2.206207000  | -2.659322000 | -0.605969000 |
| 6  | 3.352017000  | -1.121110000 | -1.574288000 |
| 1  | 3.655948000  | -0.077960000 | -1.436029000 |
| 1  | 2.773283000  | -1.198254000 | -2.500947000 |
| 1  | 4.262998000  | -1.713569000 | -1.715887000 |
| 6  | -0.103616000 | -2.245920000 | 2.329778000  |
| 1  | -0.228345000 | -3.103703000 | 1.660082000  |
| 1  | -1.027524000 | -1.663354000 | 2.322088000  |
| 1  | 0.050095000  | -2.641045000 | 3.341257000  |
| 6  | 1.551883000  | 1.060215000  | 0.241412000  |
| 6  | 2.104020000  | 1.643971000  | 1.389490000  |
| 1  | 2.275769000  | 1.049962000  | 2.280080000  |
| 6  | 2.460296000  | 2.994646000  | 1.421276000  |
| 1  | 2.894738000  | 3.414634000  | 2.323898000  |
| 6  | 2.264263000  | 3.791592000  | 0.297527000  |
| 1  | 2.538521000  | 4.842244000  | 0.311316000  |
| 6  | 1.716373000  | 3.225934000  | -0.854510000 |
| 1  | 1.572311000  | 3.842888000  | -1.738325000 |
| 6  | 1.358167000  | 1.875336000  | -0.902310000 |
| 6  | 0.805208000  | 1.319170000  | -2.197545000 |
| 1  | 1.359927000  | 0.439962000  | -2.529037000 |
| 1  | 0.873573000  | 2.071990000  | -2.991133000 |
| 8  | -0.564742000 | 0.873891000  | -2.105536000 |
| 6  | -1.518836000 | 1.937624000  | -2.238219000 |
| 1  | -1.334614000 | 2.475257000  | -3.175898000 |
| 1  | -2.503421000 | 1.472951000  | -2.269662000 |
| 1  | -1.459983000 | 2.628664000  | -1.391397000 |
| 6  | -0.642408000 | -2.769682000 | -1.369042000 |
| 1  | -0.170224000 | -3.461102000 | -0.675576000 |
| 6  | -2.016085000 | -2.466351000 | -1.190352000 |
| 6  | -2.518372000 | -1.414844000 | -1.972175000 |
| 1  | -2.195828000 | -1.304102000 | -3.006727000 |
| 1  | -2.546801000 | -2.808392000 | -0.304227000 |
| 1  | -3.497665000 | -1.006706000 | -1.739423000 |
| 1  | -0.226655000 | -2.809650000 | -2.377838000 |
| 35 | -2.189642000 | 0.478356000  | 0.909275000  |
| 11 | -3.927814000 | 1.563803000  | 2.466460000  |

9

E + ZPE = -5321.719654

|    |              |              |              |
|----|--------------|--------------|--------------|
| 28 | 1.090346000  | -0.417475000 | 0.948598000  |
| 15 | -0.953187000 | -0.836195000 | -0.082063000 |
| 6  | -0.979396000 | -1.839638000 | -1.687335000 |
| 1  | -1.184294000 | -1.138405000 | -2.501225000 |
| 6  | -2.145133000 | -2.862643000 | -1.551309000 |
| 1  | -2.651325000 | -3.002554000 | -2.513008000 |
| 1  | -1.720956000 | -3.837193000 | -1.276492000 |
| 6  | -3.114863000 | -2.417255000 | -0.450718000 |
| 1  | -3.775367000 | -3.236270000 | -0.140347000 |
| 1  | -3.762450000 | -1.603674000 | -0.802963000 |
| 6  | -2.266030000 | -1.919133000 | 0.731280000  |
| 1  | -1.693517000 | -2.772599000 | 1.125509000  |
| 6  | -3.077345000 | -1.305976000 | 1.873484000  |
| 1  | -3.602438000 | -0.399014000 | 1.554871000  |
| 1  | -2.452697000 | -1.060478000 | 2.739219000  |
| 1  | -3.833962000 | -2.021302000 | 2.216017000  |
| 6  | 0.356169000  | -2.529797000 | -1.998514000 |
| 1  | 0.669910000  | -3.188958000 | -1.180983000 |
| 1  | 1.151558000  | -1.801127000 | -2.171401000 |
| 1  | 0.249095000  | -3.148206000 | -2.898021000 |
| 6  | -1.829249000 | 0.755237000  | -0.456773000 |
| 6  | -2.566929000 | 0.964365000  | -1.630486000 |
| 1  | -2.675067000 | 0.168584000  | -2.358893000 |
| 6  | -3.191471000 | 2.185963000  | -1.894470000 |
| 1  | -3.759185000 | 2.312323000  | -2.811831000 |
| 6  | -3.089384000 | 3.229792000  | -0.980307000 |
| 1  | -3.571699000 | 4.183196000  | -1.174296000 |
| 6  | -2.363008000 | 3.038662000  | 0.195685000  |
| 1  | -2.290807000 | 3.848490000  | 0.918003000  |
| 6  | -1.731617000 | 1.821928000  | 0.473044000  |
| 6  | -0.991939000 | 1.681296000  | 1.787669000  |
| 1  | -1.307952000 | 0.793680000  | 2.336949000  |
| 1  | -1.186649000 | 2.553739000  | 2.422405000  |
| 8  | 0.437875000  | 1.533333000  | 1.648525000  |
| 6  | 1.104195000  | 2.764705000  | 1.339783000  |
| 1  | 0.850025000  | 3.513962000  | 2.099188000  |
| 1  | 2.173876000  | 2.560717000  | 1.370110000  |
| 1  | 0.824779000  | 3.128236000  | 0.346079000  |
| 6  | 2.395669000  | -1.893497000 | 1.161840000  |
| 1  | 3.336138000  | -1.829845000 | 0.621465000  |
| 6  | 2.227440000  | -1.156171000 | 2.357247000  |
| 6  | 0.867844000  | -1.121982000 | 2.774516000  |
| 1  | 0.290450000  | -2.045582000 | 2.758996000  |
| 1  | 2.986922000  | -0.488148000 | 2.754979000  |
| 1  | 0.567285000  | -0.414207000 | 3.543548000  |
| 1  | 1.869437000  | -2.838981000 | 1.036114000  |
| 35 | 2.207365000  | 0.555992000  | -1.002630000 |
| 11 | 4.534227000  | 0.717664000  | -2.155250000 |

10

E + ZPE = -2587.583186

|    |              |              |              |
|----|--------------|--------------|--------------|
| 28 | 1.744348000  | -0.584488000 | -0.112673000 |
| 15 | -0.075382000 | 0.797494000  | -0.008314000 |
| 6  | -0.095022000 | 1.950655000  | 1.485308000  |
| 1  | -1.130899000 | 1.974170000  | 1.841848000  |
| 6  | 0.248793000  | 3.330938000  | 0.884026000  |
| 1  | -0.034068000 | 4.128697000  | 1.580044000  |
| 1  | 1.334826000  | 3.409887000  | 0.734759000  |

|   |              |              |              |
|---|--------------|--------------|--------------|
| 6 | -0.472305000 | 3.456397000  | -0.463696000 |
| 1 | -0.163103000 | 4.352803000  | -1.013146000 |
| 1 | -1.555847000 | 3.539921000  | -0.304581000 |
| 6 | -0.163452000 | 2.185851000  | -1.285495000 |
| 1 | 0.869119000  | 2.263338000  | -1.652468000 |
| 6 | -1.085605000 | 1.940952000  | -2.481723000 |
| 1 | -2.129504000 | 1.828007000  | -2.173659000 |
| 1 | -0.800764000 | 1.043644000  | -3.042541000 |
| 1 | -1.029753000 | 2.790387000  | -3.171567000 |
| 6 | 0.803600000  | 1.516829000  | 2.646005000  |
| 1 | 1.853950000  | 1.454732000  | 2.341192000  |
| 1 | 0.502976000  | 0.544272000  | 3.052198000  |
| 1 | 0.739791000  | 2.244119000  | 3.463197000  |
| 6 | -1.686866000 | -0.102841000 | 0.017938000  |
| 6 | -2.867771000 | 0.560791000  | 0.386846000  |
| 1 | -2.844016000 | 1.618146000  | 0.631893000  |
| 6 | -4.092967000 | -0.104624000 | 0.441654000  |
| 1 | -4.989596000 | 0.437577000  | 0.726431000  |
| 6 | -4.156091000 | -1.461156000 | 0.133278000  |
| 1 | -5.101240000 | -1.993344000 | 0.180172000  |
| 6 | -2.993775000 | -2.135077000 | -0.241152000 |
| 1 | -3.047124000 | -3.191435000 | -0.492396000 |
| 6 | -1.759364000 | -1.478965000 | -0.314129000 |
| 6 | -0.568982000 | -2.272885000 | -0.812262000 |
| 1 | -0.133423000 | -1.818757000 | -1.709378000 |
| 1 | -0.879960000 | -3.287554000 | -1.085644000 |
| 8 | 0.531138000  | -2.371255000 | 0.121270000  |
| 6 | 0.295077000  | -3.263169000 | 1.222960000  |
| 1 | 0.090490000  | -4.272322000 | 0.848130000  |
| 1 | 1.208858000  | -3.277127000 | 1.819502000  |
| 1 | -0.544452000 | -2.916866000 | 1.835037000  |
| 6 | 3.515187000  | -0.155245000 | 0.613027000  |
| 1 | 3.720047000  | -0.540989000 | 1.612225000  |
| 6 | 3.600880000  | -1.024829000 | -0.499607000 |
| 6 | 2.937126000  | -0.480030000 | -1.633959000 |
| 1 | 3.102245000  | 0.560260000  | -1.913190000 |
| 1 | 3.868948000  | -2.074636000 | -0.416674000 |
| 1 | 2.680774000  | -1.136214000 | -2.466551000 |
| 1 | 3.700828000  | 0.911014000  | 0.490457000  |

11

E + ZPE = -2666.141612

|    |              |              |              |
|----|--------------|--------------|--------------|
| 28 | -1.670084000 | -0.175958000 | 0.101001000  |
| 15 | 0.355374000  | 0.844550000  | 0.021430000  |
| 6  | 0.796946000  | 2.220653000  | -1.188531000 |
| 1  | 1.274980000  | 1.745449000  | -2.050552000 |
| 6  | 1.801723000  | 3.161144000  | -0.440896000 |
| 1  | 2.707893000  | 3.311530000  | -1.036952000 |
| 1  | 1.333170000  | 4.146580000  | -0.339559000 |
| 6  | 2.142581000  | 2.616131000  | 0.959219000  |
| 1  | 2.427556000  | 3.426292000  | 1.640521000  |
| 1  | 2.996212000  | 1.929272000  | 0.914414000  |
| 6  | 0.917848000  | 1.859519000  | 1.501402000  |
| 1  | 0.098363000  | 2.577770000  | 1.653161000  |
| 6  | 1.169967000  | 1.115415000  | 2.812653000  |
| 1  | 1.930630000  | 0.336216000  | 2.693566000  |
| 1  | 0.256985000  | 0.657327000  | 3.209915000  |
| 1  | 1.534381000  | 1.815377000  | 3.572649000  |
| 6  | -0.412338000 | 3.017617000  | -1.702574000 |
| 1  | -0.944061000 | 3.515014000  | -0.884848000 |
| 1  | -1.130972000 | 2.401668000  | -2.250524000 |
| 1  | -0.061422000 | 3.800165000  | -2.384660000 |

|   |              |              |              |
|---|--------------|--------------|--------------|
| 6 | 1.682805000  | -0.431033000 | -0.196544000 |
| 6 | 2.834900000  | -0.202646000 | -0.963013000 |
| 1 | 2.993503000  | 0.753965000  | -1.447665000 |
| 6 | 3.814441000  | -1.187511000 | -1.115041000 |
| 1 | 4.698345000  | -0.977267000 | -1.709844000 |
| 6 | 3.657406000  | -2.427480000 | -0.502561000 |
| 1 | 4.414385000  | -3.197604000 | -0.614539000 |
| 6 | 2.512834000  | -2.675892000 | 0.256039000  |
| 1 | 2.386210000  | -3.643413000 | 0.735856000  |
| 6 | 1.525607000  | -1.698592000 | 0.417282000  |
| 6 | 0.306686000  | -2.026709000 | 1.243638000  |
| 1 | 0.130206000  | -1.302908000 | 2.040334000  |
| 1 | 0.404843000  | -3.014669000 | 1.704790000  |
| 8 | -0.918582000 | -2.018906000 | 0.460254000  |
| 6 | -1.123730000 | -3.236094000 | -0.278880000 |
| 1 | -1.115787000 | -4.081735000 | 0.416525000  |
| 1 | -2.102388000 | -3.170537000 | -0.751528000 |
| 1 | -0.345078000 | -3.373132000 | -1.036286000 |
| 6 | -2.660193000 | 1.492677000  | 0.400095000  |
| 1 | -2.904857000 | 2.145082000  | -0.433796000 |
| 6 | -3.528121000 | 0.389805000  | 0.668077000  |
| 6 | -3.069443000 | -0.534500000 | 1.597448000  |
| 1 | -2.498361000 | -0.214360000 | 2.467148000  |
| 6 | -1.452939000 | -0.594751000 | -2.407332000 |
| 6 | -2.766579000 | -0.717136000 | -2.143518000 |
| 1 | -3.447689000 | 0.115217000  | -2.296304000 |
| 1 | -3.226960000 | -1.671814000 | -1.905575000 |
| 1 | -0.776010000 | -1.442577000 | -2.375516000 |
| 1 | -1.041252000 | 0.331122000  | -2.793216000 |
| 1 | -4.344012000 | 0.137131000  | -0.003055000 |
| 1 | -3.548255000 | -1.505798000 | 1.682323000  |
| 1 | -2.222568000 | 2.016764000  | 1.249907000  |

**12**  
E + ZPE = -2666.150363

|    |              |              |              |
|----|--------------|--------------|--------------|
| 28 | -1.725321000 | -0.408474000 | 0.011257000  |
| 15 | 0.307120000  | 0.843341000  | -0.067692000 |
| 6  | 0.532616000  | 2.243879000  | -1.329867000 |
| 1  | 1.471434000  | 2.037622000  | -1.851899000 |
| 6  | 0.718412000  | 3.525623000  | -0.482389000 |
| 1  | 1.250682000  | 4.287664000  | -1.062491000 |
| 1  | -0.266656000 | 3.946746000  | -0.237076000 |
| 6  | 1.454824000  | 3.157571000  | 0.806155000  |
| 1  | 1.482810000  | 3.991518000  | 1.517256000  |
| 1  | 2.496895000  | 2.888652000  | 0.587188000  |
| 6  | 0.727460000  | 1.947235000  | 1.419186000  |
| 1  | -0.246337000 | 2.299535000  | 1.791408000  |
| 6  | 1.484397000  | 1.288634000  | 2.575508000  |
| 1  | 2.450146000  | 0.891308000  | 2.248991000  |
| 1  | 0.921304000  | 0.471827000  | 3.040072000  |
| 1  | 1.676061000  | 2.031572000  | 3.357846000  |
| 6  | -0.559951000 | 2.386178000  | -2.392478000 |
| 1  | -1.551330000 | 2.520888000  | -1.946539000 |
| 1  | -0.593643000 | 1.524412000  | -3.064562000 |
| 1  | -0.353573000 | 3.270980000  | -3.005620000 |
| 6  | 1.781609000  | -0.268928000 | -0.226796000 |
| 6  | 2.965738000  | 0.127199000  | -0.865772000 |
| 1  | 3.051175000  | 1.113537000  | -1.306984000 |
| 6  | 4.074088000  | -0.719500000 | -0.940839000 |
| 1  | 4.976560000  | -0.378809000 | -1.439499000 |
| 6  | 4.018941000  | -1.989240000 | -0.373744000 |
| 1  | 4.874268000  | -2.655694000 | -0.427507000 |

|   |              |              |              |
|---|--------------|--------------|--------------|
| 6 | 2.850079000  | -2.400314000 | 0.266858000  |
| 1 | 2.804807000  | -3.390340000 | 0.714148000  |
| 6 | 1.733990000  | -1.561175000 | 0.352600000  |
| 6 | 0.515240000  | -2.068040000 | 1.087170000  |
| 1 | 0.212105000  | -1.407124000 | 1.898652000  |
| 1 | 0.713398000  | -3.056907000 | 1.514393000  |
| 8 | -0.663020000 | -2.182539000 | 0.243027000  |
| 6 | -0.523853000 | -3.261176000 | -0.704772000 |
| 1 | -0.344510000 | -4.191390000 | -0.156073000 |
| 1 | -1.455377000 | -3.349293000 | -1.258525000 |
| 1 | 0.305387000  | -3.071023000 | -1.392676000 |
| 6 | -2.902168000 | 1.119804000  | 0.371645000  |
| 1 | -3.662399000 | 1.357373000  | -0.367989000 |
| 6 | -3.183978000 | 0.113135000  | 1.355341000  |
| 6 | -2.143843000 | -0.259635000 | 2.184218000  |
| 1 | -1.389677000 | 0.457835000  | 2.487771000  |
| 6 | -2.133206000 | -0.688147000 | -1.983890000 |
| 6 | -3.129454000 | -1.278988000 | -1.220412000 |
| 1 | -4.094655000 | -0.791480000 | -1.122288000 |
| 1 | -3.145041000 | -2.342536000 | -1.000649000 |
| 1 | -1.325052000 | -1.273651000 | -2.414170000 |
| 1 | -2.329694000 | 0.255986000  | -2.477245000 |
| 1 | -4.079339000 | -0.497877000 | 1.287567000  |
| 1 | -2.221570000 | -1.159569000 | 2.787653000  |
| 1 | -2.307475000 | 1.981004000  | 0.668474000  |

**13**  
E + ZPE = -2666.146562

|    |              |              |              |
|----|--------------|--------------|--------------|
| 28 | 1.560003000  | -0.736443000 | 0.159077000  |
| 15 | -0.088061000 | 0.948628000  | -0.036145000 |
| 6  | 0.111850000  | 2.463498000  | 1.051909000  |
| 1  | -0.882043000 | 2.925731000  | 1.126721000  |
| 6  | 0.966839000  | 3.363625000  | 0.137369000  |
| 1  | 1.066254000  | 4.364566000  | 0.571947000  |
| 1  | 1.984941000  | 2.955602000  | 0.054608000  |
| 6  | 0.278272000  | 3.407227000  | -1.232036000 |
| 1  | 0.932997000  | 3.822412000  | -2.005278000 |
| 1  | -0.592547000 | 4.070687000  | -1.166369000 |
| 6  | -0.211858000 | 1.983859000  | -1.634453000 |
| 1  | 0.496414000  | 1.544041000  | -2.343355000 |
| 6  | -1.593703000 | 2.031298000  | -2.299493000 |
| 1  | -2.355507000 | 2.422907000  | -1.617602000 |
| 1  | -1.934044000 | 1.053951000  | -2.653321000 |
| 1  | -1.549831000 | 2.697733000  | -3.168843000 |
| 6  | 0.680952000  | 2.281369000  | 2.458467000  |
| 1  | 1.684527000  | 1.842017000  | 2.438127000  |
| 1  | 0.041675000  | 1.653635000  | 3.087267000  |
| 1  | 0.761981000  | 3.258158000  | 2.948460000  |
| 6  | -1.738335000 | 0.192195000  | 0.247199000  |
| 6  | -2.633498000 | 0.671050000  | 1.210640000  |
| 1  | -2.386887000 | 1.545394000  | 1.804763000  |
| 6  | -3.862477000 | 0.038873000  | 1.423054000  |
| 1  | -4.545595000 | 0.428989000  | 2.171642000  |
| 6  | -4.208823000 | -1.080483000 | 0.671075000  |
| 1  | -5.164765000 | -1.571403000 | 0.825779000  |
| 6  | -3.318164000 | -1.571913000 | -0.286707000 |
| 1  | -3.591852000 | -2.442192000 | -0.878420000 |
| 6  | -2.082061000 | -0.957890000 | -0.504314000 |
| 6  | -1.130936000 | -1.525257000 | -1.536494000 |
| 1  | -0.705896000 | -0.744504000 | -2.171449000 |
| 1  | -1.652939000 | -2.231893000 | -2.191630000 |
| 8  | 0.013496000  | -2.192878000 | -0.955612000 |

|   |              |              |              |
|---|--------------|--------------|--------------|
| 6 | -0.259496000 | -3.557383000 | -0.610004000 |
| 1 | -0.731962000 | -4.070399000 | -1.455621000 |
| 1 | 0.697349000  | -4.039583000 | -0.406121000 |
| 1 | -0.911216000 | -3.630970000 | 0.268980000  |
| 6 | 3.524450000  | -0.288393000 | 0.363398000  |
| 1 | 4.118590000  | -0.742049000 | 1.149385000  |
| 6 | 3.271842000  | -0.984034000 | -0.836330000 |
| 6 | 2.331696000  | -0.346105000 | -1.670393000 |
| 1 | 2.394540000  | 0.731316000  | -1.792996000 |
| 6 | 0.827903000  | -1.160231000 | 2.052033000  |
| 6 | 1.759924000  | -2.111915000 | 1.688664000  |
| 1 | 2.758141000  | -2.099005000 | 2.111038000  |
| 1 | 1.453774000  | -3.065233000 | 1.271723000  |
| 1 | -0.235718000 | -1.353535000 | 1.950490000  |
| 1 | 1.099191000  | -0.382158000 | 2.756829000  |
| 1 | 3.564835000  | -2.021884000 | -0.969588000 |
| 1 | 1.892293000  | -0.885468000 | -2.504866000 |
| 1 | 3.539883000  | 0.800817000  | 0.359129000  |

**14**  
E + ZPE = -2666.155749

|    |              |              |              |
|----|--------------|--------------|--------------|
| 28 | 1.452312000  | -0.895867000 | 0.371536000  |
| 15 | 0.178464000  | 0.901418000  | -0.093953000 |
| 6  | 0.713187000  | 2.469610000  | 0.784427000  |
| 1  | -0.119288000 | 3.175994000  | 0.662940000  |
| 6  | 1.874808000  | 2.912889000  | -0.129977000 |
| 1  | 2.160458000  | 3.943422000  | 0.105968000  |
| 1  | 2.752899000  | 2.292990000  | 0.092628000  |
| 6  | 1.466419000  | 2.767048000  | -1.613827000 |
| 1  | 2.329560000  | 2.476667000  | -2.220191000 |
| 1  | 1.125997000  | 3.731809000  | -2.003096000 |
| 6  | 0.303610000  | 1.734701000  | -1.781420000 |
| 1  | 0.577310000  | 0.979917000  | -2.522536000 |
| 6  | -0.995771000 | 2.417726000  | -2.238041000 |
| 1  | -1.330369000 | 3.177926000  | -1.523617000 |
| 1  | -1.819195000 | 1.713227000  | -2.381791000 |
| 1  | -0.816839000 | 2.921120000  | -3.194852000 |
| 6  | 1.121143000  | 2.422529000  | 2.258320000  |
| 1  | 1.955682000  | 1.732764000  | 2.425508000  |
| 1  | 0.300360000  | 2.135902000  | 2.923391000  |
| 1  | 1.454568000  | 3.418564000  | 2.570414000  |
| 6  | -1.591288000 | 0.539171000  | 0.239354000  |
| 6  | -2.247407000 | 1.181565000  | 1.298692000  |
| 1  | -1.727266000 | 1.923019000  | 1.896120000  |
| 6  | -3.583074000 | 0.899733000  | 1.596615000  |
| 1  | -4.072409000 | 1.415144000  | 2.417568000  |
| 6  | -4.280136000 | -0.030361000 | 0.831501000  |
| 1  | -5.320676000 | -0.251632000 | 1.048748000  |
| 6  | -3.635079000 | -0.676524000 | -0.225854000 |
| 1  | -4.186878000 | -1.391113000 | -0.831593000 |
| 6  | -2.295853000 | -0.418730000 | -0.535573000 |
| 6  | -1.651884000 | -1.168660000 | -1.690952000 |
| 1  | -1.062322000 | -0.499772000 | -2.322043000 |
| 1  | -2.433991000 | -1.606257000 | -2.325361000 |
| 8  | -0.740330000 | -2.191657000 | -1.276675000 |
| 6  | -1.378803000 | -3.425157000 | -0.957511000 |
| 1  | -1.930683000 | -3.813436000 | -1.824123000 |
| 1  | -0.589691000 | -4.132650000 | -0.693867000 |
| 1  | -2.071527000 | -3.325396000 | -0.110755000 |
| 6  | 3.042239000  | -2.189129000 | 0.544044000  |
| 1  | 2.954492000  | -3.187545000 | 0.961124000  |
| 6  | 2.727958000  | -1.963478000 | -0.796764000 |

|   |              |              |              |
|---|--------------|--------------|--------------|
| 6 | 2.631653000  | -0.621863000 | -1.225919000 |
| 1 | 3.369306000  | 0.102314000  | -0.876440000 |
| 6 | 0.312445000  | -2.025101000 | 1.722281000  |
| 6 | 0.911989000  | -0.983723000 | 2.382892000  |
| 1 | 0.328922000  | -0.108992000 | 2.647046000  |
| 1 | 1.841625000  | -1.117184000 | 2.931420000  |
| 1 | 0.728893000  | -3.026636000 | 1.729033000  |
| 1 | -0.717836000 | -1.939073000 | 1.394808000  |
| 1 | 2.252838000  | -2.749278000 | -1.381043000 |
| 1 | 2.232154000  | -0.419547000 | -2.213942000 |
| 1 | 3.737911000  | -1.529482000 | 1.064490000  |

**15**  
E + ZPE = -2666.147792

|    |              |              |              |
|----|--------------|--------------|--------------|
| 28 | 1.650089000  | -0.152177000 | -0.152147000 |
| 15 | -0.347207000 | 0.850710000  | -0.045402000 |
| 6  | -0.701675000 | 2.210047000  | 1.214818000  |
| 1  | -1.302889000 | 1.752023000  | 2.005753000  |
| 6  | -1.535518000 | 3.293362000  | 0.459756000  |
| 1  | -2.353919000 | 3.657171000  | 1.089820000  |
| 1  | -0.883588000 | 4.154286000  | 0.267844000  |
| 6  | -2.049200000 | 2.748916000  | -0.881433000 |
| 1  | -2.330225000 | 3.562527000  | -1.560279000 |
| 1  | -2.945519000 | 2.132089000  | -0.739681000 |
| 6  | -0.930368000 | 1.890911000  | -1.499509000 |
| 1  | -0.076232000 | 2.546639000  | -1.722777000 |
| 6  | -1.331336000 | 1.155495000  | -2.778975000 |
| 1  | -2.120854000 | 0.419681000  | -2.593081000 |
| 1  | -0.480854000 | 0.648511000  | -3.248020000 |
| 1  | -1.717548000 | 1.874119000  | -3.510190000 |
| 6  | 0.541134000  | 2.825919000  | 1.876006000  |
| 1  | 1.199308000  | 3.298217000  | 1.140764000  |
| 1  | 1.130321000  | 2.097723000  | 2.440718000  |
| 1  | 0.223697000  | 3.605626000  | 2.577642000  |
| 6  | -1.671305000 | -0.424399000 | 0.181266000  |
| 6  | -2.807431000 | -0.206763000 | 0.973719000  |
| 1  | -2.959934000 | 0.744599000  | 1.470692000  |
| 6  | -3.781907000 | -1.195213000 | 1.135080000  |
| 1  | -4.654083000 | -0.993134000 | 1.749627000  |
| 6  | -3.633950000 | -2.428251000 | 0.506961000  |
| 1  | -4.385743000 | -3.202133000 | 0.627643000  |
| 6  | -2.507812000 | -2.663548000 | -0.283059000 |
| 1  | -2.392626000 | -3.623294000 | -0.780901000 |
| 6  | -1.527108000 | -1.682078000 | -0.457235000 |
| 6  | -0.345424000 | -1.986235000 | -1.346425000 |
| 1  | -0.222666000 | -1.245797000 | -2.138183000 |
| 1  | -0.461623000 | -2.965634000 | -1.821203000 |
| 8  | 0.922339000  | -1.979280000 | -0.636261000 |
| 6  | 1.222575000  | -3.230427000 | 0.006462000  |
| 1  | 1.251935000  | -4.024671000 | -0.746627000 |
| 1  | 2.205552000  | -3.128527000 | 0.464076000  |
| 1  | 0.473179000  | -3.470858000 | 0.767737000  |
| 6  | 3.560880000  | -0.665794000 | -0.698716000 |
| 1  | 3.719308000  | -1.572964000 | -1.275562000 |
| 6  | 3.087027000  | 0.485345000  | -1.341390000 |
| 6  | 2.628801000  | 1.521493000  | -0.480669000 |
| 1  | 3.210924000  | 1.773119000  | 0.405865000  |
| 6  | 1.150825000  | -0.845069000 | 2.487545000  |
| 6  | 2.480015000  | -0.760457000 | 2.334325000  |
| 1  | 3.016583000  | 0.167261000  | 2.514575000  |
| 1  | 3.088220000  | -1.636665000 | 2.130361000  |
| 1  | 0.619007000  | -1.786381000 | 2.390928000  |



|   |             |              |              |
|---|-------------|--------------|--------------|
| 1 | 0.556570000 | 0.006505000  | 2.801861000  |
| 1 | 2.830798000 | 0.477655000  | -2.399410000 |
| 1 | 2.128314000 | 2.377962000  | -0.924474000 |
| 1 | 4.172166000 | -0.570657000 | 0.194551000  |

**S1**

E + ZPE = -2044.711735

|    |              |              |              |
|----|--------------|--------------|--------------|
| 28 | -0.134518000 | 0.169889000  | -0.025422000 |
| 6  | -2.113854000 | 0.204073000  | 0.213164000  |
| 1  | -2.213161000 | 0.254341000  | 1.299185000  |
| 15 | 2.003580000  | -0.386456000 | -0.011781000 |
| 1  | 3.000864000  | 0.615502000  | -0.036161000 |
| 1  | 2.488191000  | -1.199009000 | -1.055506000 |
| 1  | 2.455672000  | -1.119560000 | 1.102132000  |
| 6  | -1.701938000 | -0.986520000 | -0.403140000 |
| 6  | -0.662352000 | -1.699154000 | 0.243912000  |
| 1  | -0.689176000 | -1.821870000 | 1.328896000  |
| 8  | 0.043276000  | 2.093158000  | 0.038363000  |
| 1  | 0.814072000  | 2.605244000  | -0.255833000 |
| 1  | -0.735958000 | 2.665573000  | -0.046976000 |
| 1  | -1.927720000 | -1.171941000 | -1.452269000 |
| 1  | -0.200093000 | -2.528951000 | -0.285347000 |
| 1  | -2.757226000 | 0.884962000  | -0.340112000 |

**S2**

E + ZPE = -2046.859485

|    |              |              |              |
|----|--------------|--------------|--------------|
| 28 | 0.130812000  | 0.044763000  | -0.028039000 |
| 6  | 2.117734000  | -0.003392000 | -0.329920000 |
| 1  | 2.129600000  | -0.045743000 | -1.421414000 |
| 15 | -2.022401000 | -0.545013000 | 0.005459000  |
| 1  | -3.006660000 | 0.465785000  | 0.041858000  |
| 1  | -2.480580000 | -1.353858000 | 1.063748000  |
| 1  | -2.491294000 | -1.291648000 | -1.093177000 |
| 6  | 1.727705000  | -1.128370000 | 0.410248000  |
| 6  | 0.666441000  | -1.897514000 | -0.106198000 |
| 1  | 0.617019000  | -2.090196000 | -1.180499000 |
| 6  | -0.099081000 | 2.029901000  | -0.597286000 |
| 6  | 0.082115000  | 1.966067000  | 0.762667000  |
| 1  | -0.764751000 | 2.006289000  | 1.445379000  |
| 1  | 1.051798000  | 2.160732000  | 1.211775000  |
| 1  | 0.729290000  | 2.271534000  | -1.258408000 |
| 1  | -1.091142000 | 2.153918000  | -1.025532000 |
| 1  | 1.994413000  | -1.205879000 | 1.463371000  |
| 1  | 0.215363000  | -2.668507000 | 0.512387000  |
| 1  | 2.800742000  | 0.719266000  | 0.106654000  |

**S3**

E + ZPE = -2277.848315

|    |              |              |              |
|----|--------------|--------------|--------------|
| 28 | 1.340581000  | 0.031097000  | 0.126426000  |
| 6  | 2.610840000  | -1.520344000 | 0.305181000  |
| 1  | 3.431073000  | -1.029711000 | 0.832478000  |
| 15 | 0.668494000  | 2.096691000  | -0.377706000 |
| 1  | -0.083900000 | 2.856500000  | 0.540871000  |
| 1  | -0.119926000 | 2.282583000  | -1.529919000 |
| 1  | 1.696274000  | 3.022130000  | -0.648002000 |
| 6  | 2.377147000  | -1.239152000 | -1.049104000 |
| 6  | 2.572833000  | 0.092429000  | -1.467774000 |
| 1  | 3.430686000  | 0.651051000  | -1.089380000 |

|   |              |              |              |
|---|--------------|--------------|--------------|
| 6 | 0.578511000  | -0.046280000 | 2.034103000  |
| 6 | -0.192391000 | -0.893019000 | 1.253639000  |
| 1 | 0.073264000  | -1.947750000 | 1.236949000  |
| 1 | 1.340457000  | -0.473263000 | 2.680563000  |
| 1 | 0.213529000  | 0.930484000  | 2.338655000  |
| 1 | 1.781094000  | -1.920501000 | -1.654187000 |
| 1 | 2.239701000  | 0.390891000  | -2.458379000 |
| 1 | 2.320103000  | -2.483412000 | 0.714160000  |
| 6 | -1.453327000 | -0.578035000 | 0.574416000  |
| 6 | -2.215959000 | 0.571307000  | 0.872078000  |
| 1 | -1.902542000 | 1.241666000  | 1.667293000  |
| 6 | -1.936578000 | -1.475668000 | -0.399862000 |
| 1 | -1.375659000 | -2.382286000 | -0.615274000 |
| 6 | -3.125541000 | -1.220055000 | -1.077442000 |
| 6 | -3.408661000 | 0.819104000  | 0.199795000  |
| 6 | -3.861532000 | -0.069916000 | -0.781627000 |
| 1 | -3.998945000 | 1.694684000  | 0.452836000  |
| 1 | -3.485111000 | -1.921387000 | -1.824012000 |
| 1 | -4.795842000 | 0.125007000  | -1.299401000 |

**S4**

E + ZPE = -2666.144361

|    |              |              |              |
|----|--------------|--------------|--------------|
| 28 | 1.653064000  | -0.194131000 | -0.128190000 |
| 15 | -0.305962000 | 0.869859000  | -0.052438000 |
| 6  | -0.543538000 | 2.245184000  | 1.223911000  |
| 1  | -1.216179000 | 1.852241000  | 1.992136000  |
| 6  | -1.234076000 | 3.416623000  | 0.463605000  |
| 1  | -1.959647000 | 3.918360000  | 1.112511000  |
| 1  | -0.470660000 | 4.163260000  | 0.210367000  |
| 6  | -1.877440000 | 2.904398000  | -0.830918000 |
| 1  | -2.122622000 | 3.728781000  | -1.510579000 |
| 1  | -2.816220000 | 2.375336000  | -0.622093000 |
| 6  | -0.874996000 | 1.940008000  | -1.491687000 |
| 1  | 0.017415000  | 2.516054000  | -1.771731000 |
| 6  | -1.409562000 | 1.228622000  | -2.735569000 |
| 1  | -2.241094000 | 0.558253000  | -2.494817000 |
| 1  | -0.632002000 | 0.653055000  | -3.249342000 |
| 1  | -1.780723000 | 1.971796000  | -3.449886000 |
| 6  | 0.744562000  | 2.701941000  | 1.924219000  |
| 1  | 1.498595000  | 3.045240000  | 1.208048000  |
| 1  | 1.191761000  | 1.916355000  | 2.539878000  |
| 1  | 0.516298000  | 3.545070000  | 2.586064000  |
| 6  | -1.678046000 | -0.351132000 | 0.195420000  |
| 6  | -2.786795000 | -0.081483000 | 1.010132000  |
| 1  | -2.881757000 | 0.873075000  | 1.515338000  |
| 6  | -3.806980000 | -1.020381000 | 1.185339000  |
| 1  | -4.655519000 | -0.778957000 | 1.818453000  |
| 6  | -3.733654000 | -2.254147000 | 0.546308000  |
| 1  | -4.520989000 | -2.990266000 | 0.676523000  |
| 6  | -2.637400000 | -2.538837000 | -0.269345000 |
| 1  | -2.582910000 | -3.497953000 | -0.778544000 |
| 6  | -1.610119000 | -1.608907000 | -0.456653000 |
| 6  | -0.463594000 | -1.969386000 | -1.373513000 |
| 1  | -0.309226000 | -1.216733000 | -2.149104000 |
| 1  | -0.659057000 | -2.923487000 | -1.874140000 |
| 8  | 0.807322000  | -2.062794000 | -0.685614000 |
| 6  | 1.064632000  | -3.366705000 | -0.142736000 |
| 1  | 1.077537000  | -4.106227000 | -0.950998000 |
| 1  | 2.046784000  | -3.331914000 | 0.328546000  |
| 1  | 0.304554000  | -3.645412000 | 0.595965000  |
| 6  | 2.463918000  | 1.281740000  | -1.151021000 |
| 1  | 2.312231000  | 2.321688000  | -0.873518000 |

|   |             |              |              |
|---|-------------|--------------|--------------|
| 6 | 3.473943000 | 0.549835000  | -0.478735000 |
| 6 | 3.506525000 | -0.828254000 | -0.715308000 |
| 1 | 3.275532000 | -1.220470000 | -1.704359000 |
| 6 | 0.989381000 | -1.016822000 | 2.357505000  |
| 6 | 2.317231000 | -0.842593000 | 2.267978000  |
| 1 | 2.786688000 | 0.103374000  | 2.522919000  |
| 1 | 2.987297000 | -1.674288000 | 2.072453000  |
| 1 | 0.524214000 | -1.984176000 | 2.202142000  |
| 1 | 0.327896000 | -0.216338000 | 2.672011000  |
| 1 | 3.997111000 | 0.983176000  | 0.370958000  |
| 1 | 4.142612000 | -1.461643000 | -0.104125000 |
| 1 | 2.263204000 | 1.074671000  | -2.203860000 |

**S5**  
E + ZPE = -2666.156054

|    |              |              |              |
|----|--------------|--------------|--------------|
| 28 | -1.763531000 | -0.052314000 | -0.210032000 |
| 15 | 0.250136000  | 0.879761000  | 0.027090000  |
| 6  | 0.514366000  | 2.331570000  | -1.146621000 |
| 1  | 0.991295000  | 1.955234000  | -2.056555000 |
| 6  | 1.448180000  | 3.342496000  | -0.407031000 |
| 1  | 2.310582000  | 3.600036000  | -1.030155000 |
| 1  | 0.890959000  | 4.272743000  | -0.249105000 |
| 6  | 1.893990000  | 2.779584000  | 0.953903000  |
| 1  | 2.140311000  | 3.584242000  | 1.656020000  |
| 1  | 2.797909000  | 2.167864000  | 0.847492000  |
| 6  | 0.757817000  | 1.908295000  | 1.520872000  |
| 1  | -0.110976000 | 2.554904000  | 1.710945000  |
| 6  | 1.141796000  | 1.184035000  | 2.811693000  |
| 1  | 1.970826000  | 0.487666000  | 2.648071000  |
| 1  | 0.305627000  | 0.633126000  | 3.252762000  |
| 1  | 1.472387000  | 1.917285000  | 3.555627000  |
| 6  | -0.820003000 | 2.989975000  | -1.540676000 |
| 1  | -1.382504000 | 3.317286000  | -0.658225000 |
| 1  | -1.464680000 | 2.328491000  | -2.128026000 |
| 1  | -0.621727000 | 3.879299000  | -2.149179000 |
| 6  | 1.642849000  | -0.314061000 | -0.221486000 |
| 6  | 2.711240000  | 0.013683000  | -1.069723000 |
| 1  | 2.738168000  | 0.972961000  | -1.574037000 |
| 6  | 3.769107000  | -0.872657000 | -1.285299000 |
| 1  | 4.582070000  | -0.588542000 | -1.946688000 |
| 6  | 3.775429000  | -2.108966000 | -0.648116000 |
| 1  | 4.592753000  | -2.806228000 | -0.805124000 |
| 6  | 2.720505000  | -2.447243000 | 0.200979000  |
| 1  | 2.731405000  | -3.408809000 | 0.708208000  |
| 6  | 1.648650000  | -1.576701000 | 0.426685000  |
| 6  | 0.541495000  | -2.028417000 | 1.362706000  |
| 1  | 0.281951000  | -1.243536000 | 2.074965000  |
| 1  | 0.880608000  | -2.896843000 | 1.942613000  |
| 8  | -0.687817000 | -2.350470000 | 0.699063000  |
| 6  | -0.673548000 | -3.627483000 | 0.062284000  |
| 1  | -0.478699000 | -4.423405000 | 0.793212000  |
| 1  | -1.665406000 | -3.778521000 | -0.369536000 |
| 1  | 0.081049000  | -3.679991000 | -0.733059000 |
| 6  | -2.189163000 | 0.361803000  | 1.704048000  |
| 1  | -1.846501000 | 1.257363000  | 2.209778000  |
| 6  | -3.355921000 | 0.441401000  | 0.921247000  |
| 6  | -3.698493000 | -0.688759000 | 0.168824000  |
| 1  | -3.500902000 | -1.683436000 | 0.564022000  |
| 6  | -1.024515000 | -0.604353000 | -2.062921000 |
| 6  | -2.387083000 | -0.823401000 | -2.049941000 |
| 1  | -3.066695000 | -0.116111000 | -2.518309000 |
| 1  | -2.777154000 | -1.827896000 | -1.922000000 |

|   |              |              |              |
|---|--------------|--------------|--------------|
| 1 | -0.334100000 | -1.428107000 | -1.915692000 |
| 1 | -0.622571000 | 0.253762000  | -2.592127000 |
| 1 | -3.804524000 | 1.407240000  | 0.694799000  |
| 1 | -4.513611000 | -0.626861000 | -0.543507000 |
| 1 | -1.948679000 | -0.573877000 | 2.206318000  |

**S6**  
E + ZPE = -2666.157962

|    |              |              |              |
|----|--------------|--------------|--------------|
| 28 | 1.715112000  | -0.016372000 | -0.233393000 |
| 15 | -0.368388000 | -0.866619000 | 0.030088000  |
| 6  | -0.859664000 | -2.283043000 | -1.098690000 |
| 1  | -1.078432000 | -1.893363000 | -2.098379000 |
| 6  | -2.125243000 | -2.931018000 | -0.452236000 |
| 1  | -3.021136000 | -2.698659000 | -1.035263000 |
| 1  | -2.011710000 | -4.019394000 | -0.487479000 |
| 6  | -2.299736000 | -2.451513000 | 1.010457000  |
| 1  | -2.603193000 | -3.274109000 | 1.667355000  |
| 1  | -3.092318000 | -1.696544000 | 1.069191000  |
| 6  | -0.988479000 | -1.824501000 | 1.527323000  |
| 1  | -0.235898000 | -2.616209000 | 1.645588000  |
| 6  | -1.161724000 | -1.117033000 | 2.870663000  |
| 1  | -1.873272000 | -0.287230000 | 2.802549000  |
| 1  | -0.215506000 | -0.742068000 | 3.273358000  |
| 1  | -1.562583000 | -1.827148000 | 3.602615000  |
| 6  | 0.281605000  | -3.314659000 | -1.208455000 |
| 1  | 0.536704000  | -3.739852000 | -0.231473000 |
| 1  | 1.195633000  | -2.901413000 | -1.642549000 |
| 1  | -0.043833000 | -4.143787000 | -1.845926000 |
| 6  | -1.576754000 | 0.504785000  | -0.235432000 |
| 6  | -2.620808000 | 0.393173000  | -1.164838000 |
| 1  | -2.757858000 | -0.522002000 | -1.729818000 |
| 6  | -3.512391000 | 1.447040000  | -1.381890000 |
| 1  | -4.315880000 | 1.331456000  | -2.103127000 |
| 6  | -3.370105000 | 2.634026000  | -0.669610000 |
| 1  | -4.061191000 | 3.456505000  | -0.826824000 |
| 6  | -2.326224000 | 2.763845000  | 0.248545000  |
| 1  | -2.214233000 | 3.691500000  | 0.804513000  |
| 6  | -1.419225000 | 1.723642000  | 0.473473000  |
| 6  | -0.286710000 | 1.941313000  | 1.457624000  |
| 1  | -0.195066000 | 1.114973000  | 2.161942000  |
| 1  | -0.464696000 | 2.852755000  | 2.040648000  |
| 8  | 1.008095000  | 2.034514000  | 0.828490000  |
| 6  | 1.258187000  | 3.331608000  | 0.274055000  |
| 1  | 1.168737000  | 4.096633000  | 1.054638000  |
| 1  | 2.281118000  | 3.330263000  | -0.104680000 |
| 1  | 0.563814000  | 3.561003000  | -0.542404000 |
| 6  | 2.359985000  | -0.773293000 | 1.545390000  |
| 1  | 2.046764000  | -1.745260000 | 1.912530000  |
| 6  | 3.421213000  | -0.700088000 | 0.624515000  |
| 6  | 3.661423000  | 0.540117000  | 0.015683000  |
| 1  | 3.543746000  | 1.455037000  | 0.592442000  |
| 6  | 1.477322000  | 1.014135000  | -2.025113000 |
| 6  | 1.883436000  | -0.274699000 | -2.286051000 |
| 1  | 1.167472000  | -1.014643000 | -2.626850000 |
| 1  | 2.923745000  | -0.510057000 | -2.492386000 |
| 1  | 2.193136000  | 1.830002000  | -2.012722000 |
| 1  | 0.434422000  | 1.298928000  | -2.130512000 |
| 1  | 3.823996000  | -1.611316000 | 0.185904000  |
| 1  | 4.351191000  | 0.602248000  | -0.821256000 |
| 1  | 2.177595000  | 0.060342000  | 2.221676000  |

16

E + ZPE = -2666.153267

|    |              |              |              |
|----|--------------|--------------|--------------|
| 28 | 1.556817000  | -0.754490000 | 0.295732000  |
| 15 | 0.076593000  | 0.909963000  | -0.025291000 |
| 6  | 0.404696000  | 2.454285000  | 0.976699000  |
| 1  | -0.524751000 | 3.038691000  | 0.943146000  |
| 6  | 1.444159000  | 3.165049000  | 0.086545000  |
| 1  | 1.600131000  | 4.190414000  | 0.439068000  |
| 1  | 2.411490000  | 2.656480000  | 0.178669000  |
| 6  | 0.943406000  | 3.147327000  | -1.369914000 |
| 1  | 1.776605000  | 3.244025000  | -2.073341000 |
| 1  | 0.295469000  | 4.014747000  | -1.536127000 |
| 6  | 0.109789000  | 1.857067000  | -1.669873000 |
| 1  | 0.625791000  | 1.232454000  | -2.404479000 |
| 6  | -1.273878000 | 2.212356000  | -2.235546000 |
| 1  | -1.863382000 | 2.802428000  | -1.525858000 |
| 1  | -1.863441000 | 1.333603000  | -2.508242000 |
| 1  | -1.140222000 | 2.816749000  | -3.140049000 |
| 6  | 0.851535000  | 2.297926000  | 2.430572000  |
| 1  | 1.781088000  | 1.721764000  | 2.505827000  |
| 1  | 0.093350000  | 1.811696000  | 3.052733000  |
| 1  | 1.043561000  | 3.285966000  | 2.863240000  |
| 6  | -1.663560000 | 0.364163000  | 0.221082000  |
| 6  | -2.457056000 | 0.957996000  | 1.211817000  |
| 1  | -2.057449000 | 1.750200000  | 1.836051000  |
| 6  | -3.778195000 | 0.550977000  | 1.415525000  |
| 1  | -4.375586000 | 1.028104000  | 2.186604000  |
| 6  | -4.322181000 | -0.456082000 | 0.623915000  |
| 1  | -5.350181000 | -0.774133000 | 0.768576000  |
| 6  | -3.536560000 | -1.058661000 | -0.361155000 |
| 1  | -3.964711000 | -1.840855000 | -0.983198000 |
| 6  | -2.208542000 | -0.675058000 | -0.573107000 |
| 6  | -1.391710000 | -1.395840000 | -1.629894000 |
| 1  | -0.800514000 | -0.696806000 | -2.227805000 |
| 1  | -2.060767000 | -1.930434000 | -2.317762000 |
| 8  | -0.434967000 | -2.310699000 | -1.083920000 |
| 6  | -1.008914000 | -3.540911000 | -0.648127000 |
| 1  | -1.547079000 | -4.032557000 | -1.469956000 |
| 1  | -0.182964000 | -4.183703000 | -0.335886000 |
| 1  | -1.697805000 | -3.397648000 | 0.194579000  |
| 6  | 3.164053000  | -2.027796000 | 0.002110000  |
| 1  | 3.053520000  | -3.106351000 | -0.022406000 |
| 6  | 2.852725000  | -1.279255000 | -1.144247000 |
| 6  | 2.833471000  | 0.116647000  | -0.993503000 |
| 1  | 3.547288000  | 0.591724000  | -0.318913000 |
| 6  | 0.507029000  | -1.167504000 | 2.026370000  |
| 6  | 1.438816000  | -2.171148000 | 1.862643000  |
| 1  | 2.356949000  | -2.168518000 | 2.441675000  |
| 1  | 1.145741000  | -3.133457000 | 1.456235000  |
| 1  | 2.375271000  | -1.751460000 | -2.000194000 |
| 1  | 2.527144000  | 0.733983000  | -1.828923000 |
| 1  | 3.925684000  | -1.661056000 | 0.687655000  |
| 1  | -0.530569000 | -1.345343000 | 1.767899000  |
| 1  | 0.685807000  | -0.378068000 | 2.749949000  |

17

E + ZPE = -2666.138669

|    |              |              |              |
|----|--------------|--------------|--------------|
| 28 | 1.542274000  | -0.436658000 | 0.158644000  |
| 15 | -0.103986000 | 0.961943000  | -0.017664000 |
| 6  | 0.060891000  | 2.485767000  | 1.048342000  |
| 1  | -0.939085000 | 2.938531000  | 1.094374000  |

|   |              |              |              |
|---|--------------|--------------|--------------|
| 6 | 0.932457000  | 3.378405000  | 0.141605000  |
| 1 | 0.993230000  | 4.391753000  | 0.553495000  |
| 1 | 1.959079000  | 2.988765000  | 0.112808000  |
| 6 | 0.300069000  | 3.378743000  | -1.257487000 |
| 1 | 0.992050000  | 3.760599000  | -2.014806000 |
| 1 | -0.564936000 | 4.052613000  | -1.252785000 |
| 6 | -0.194354000 | 1.948633000  | -1.638693000 |
| 1 | 0.519215000  | 1.479952000  | -2.322472000 |
| 6 | -1.570595000 | 1.989929000  | -2.316008000 |
| 1 | -2.336757000 | 2.396514000  | -1.647702000 |
| 1 | -1.910774000 | 1.008519000  | -2.656825000 |
| 1 | -1.514986000 | 2.642659000  | -3.194863000 |
| 6 | 0.602547000  | 2.308777000  | 2.466009000  |
| 1 | 1.617157000  | 1.896134000  | 2.455326000  |
| 1 | -0.026641000 | 1.650365000  | 3.073405000  |
| 1 | 0.645577000  | 3.281791000  | 2.967600000  |
| 6 | -1.729897000 | 0.154909000  | 0.261217000  |
| 6 | -2.595930000 | 0.631199000  | 1.254261000  |
| 1 | -2.317330000 | 1.484241000  | 1.864048000  |
| 6 | -3.835137000 | 0.026387000  | 1.479133000  |
| 1 | -4.491190000 | 0.414652000  | 2.252367000  |
| 6 | -4.224576000 | -1.062074000 | 0.704354000  |
| 1 | -5.189890000 | -1.532982000 | 0.863541000  |
| 6 | -3.364756000 | -1.548131000 | -0.282972000 |
| 1 | -3.673160000 | -2.395038000 | -0.891076000 |
| 6 | -2.114102000 | -0.967194000 | -0.514206000 |
| 6 | -1.205867000 | -1.575065000 | -1.568773000 |
| 1 | -0.708214000 | -0.806160000 | -2.166078000 |
| 1 | -1.798080000 | -2.191736000 | -2.258655000 |
| 8 | -0.140515000 | -2.362344000 | -1.021713000 |
| 6 | -0.565329000 | -3.644222000 | -0.562585000 |
| 1 | -1.061781000 | -4.200930000 | -1.369023000 |
| 1 | 0.331873000  | -4.190002000 | -0.262880000 |
| 1 | -1.248240000 | -3.567526000 | 0.292899000  |
| 6 | 3.373004000  | -1.600998000 | 0.334529000  |
| 1 | 3.815510000  | -2.592520000 | 0.248936000  |
| 6 | 2.987581000  | -1.069411000 | -1.002998000 |
| 6 | 2.940162000  | 0.289020000  | -1.233984000 |
| 1 | 3.492244000  | 0.991564000  | -0.611945000 |
| 6 | 1.034754000  | -1.080035000 | 1.838828000  |
| 6 | 2.118698000  | -2.046485000 | 1.505276000  |
| 1 | 2.812014000  | -2.203831000 | 2.332211000  |
| 1 | 1.746041000  | -3.000459000 | 1.137672000  |
| 1 | 2.660445000  | -1.773845000 | -1.765173000 |
| 1 | 2.655892000  | 0.657915000  | -2.214473000 |
| 1 | 4.060998000  | -0.939897000 | 0.865251000  |
| 1 | 0.034492000  | -1.506965000 | 1.891041000  |
| 1 | 1.247767000  | -0.427550000 | 2.685320000  |

18

E + ZPE = -2666.138444

|    |              |              |              |
|----|--------------|--------------|--------------|
| 28 | 1.540264000  | -0.382115000 | 0.134703000  |
| 15 | -0.146576000 | 0.960843000  | -0.013300000 |
| 6  | -0.032579000 | 2.485241000  | 1.058722000  |
| 1  | -1.049025000 | 2.898581000  | 1.112495000  |
| 6  | 0.796915000  | 3.416761000  | 0.151729000  |
| 1  | 0.820320000  | 4.429428000  | 0.569113000  |
| 1  | 1.837962000  | 3.068294000  | 0.112555000  |
| 6  | 0.153762000  | 3.398381000  | -1.241611000 |
| 1  | 0.816017000  | 3.826193000  | -2.000988000 |
| 1  | -0.747837000 | 4.022440000  | -1.221219000 |
| 6  | -0.261789000 | 1.947556000  | -1.633584000 |

|   |              |              |              |
|---|--------------|--------------|--------------|
| 1 | 0.489319000  | 1.517040000  | -2.302596000 |
| 6 | -1.624833000 | 1.921221000  | -2.337458000 |
| 1 | -2.423089000 | 2.287070000  | -1.683406000 |
| 1 | -1.908749000 | 0.925101000  | -2.686710000 |
| 1 | -1.585491000 | 2.577996000  | -3.214206000 |
| 6 | 0.523248000  | 2.321831000  | 2.472336000  |
| 1 | 1.556548000  | 1.959254000  | 2.452809000  |
| 1 | -0.070428000 | 1.627505000  | 3.075452000  |
| 1 | 0.521231000  | 3.291089000  | 2.982929000  |
| 6 | -1.744594000 | 0.099385000  | 0.263280000  |
| 6 | -2.630534000 | 0.548626000  | 1.251528000  |
| 1 | -2.383586000 | 1.411407000  | 1.861359000  |
| 6 | -3.849698000 | -0.096878000 | 1.472548000  |
| 1 | -4.521819000 | 0.271116000  | 2.241884000  |
| 6 | -4.198932000 | -1.199825000 | 0.699131000  |
| 1 | -5.148630000 | -1.702427000 | 0.855277000  |
| 6 | -3.318352000 | -1.659940000 | -0.282344000 |
| 1 | -3.594480000 | -2.519274000 | -0.888573000 |
| 6 | -2.087119000 | -1.037657000 | -0.509735000 |
| 6 | -1.153707000 | -1.618615000 | -1.557254000 |
| 1 | -0.685956000 | -0.836753000 | -2.161929000 |
| 1 | -1.719545000 | -2.265498000 | -2.241434000 |
| 8 | -0.059193000 | -2.358260000 | -1.000460000 |
| 6 | -0.437261000 | -3.649600000 | -0.525801000 |
| 1 | -0.914619000 | -4.232136000 | -1.325378000 |
| 1 | 0.478978000  | -4.159928000 | -0.221613000 |
| 1 | -1.121248000 | -3.587219000 | 0.329858000  |
| 6 | 3.443128000  | -1.484391000 | 0.375472000  |
| 1 | 3.991094000  | -2.423434000 | 0.283129000  |
| 6 | 3.033467000  | -0.997590000 | -0.986086000 |
| 6 | 2.964640000  | 0.345676000  | -1.271476000 |
| 1 | 3.475056000  | 1.087178000  | -0.659778000 |
| 6 | 1.128729000  | -1.021933000 | 1.828742000  |
| 6 | 2.239495000  | -1.978059000 | 1.476094000  |
| 1 | 2.888098000  | -2.162556000 | 2.335494000  |
| 1 | 1.864647000  | -2.928722000 | 1.098721000  |
| 1 | 2.742487000  | -1.737934000 | -1.728946000 |
| 1 | 2.681817000  | 0.672483000  | -2.267480000 |
| 1 | 4.079733000  | -0.758958000 | 0.888315000  |
| 1 | 0.151516000  | -1.488228000 | 1.949164000  |
| 1 | 1.360564000  | -0.357589000 | 2.661821000  |

**19**  
E + ZPE = -2666.137577

|    |              |              |              |
|----|--------------|--------------|--------------|
| 28 | 1.486468000  | -0.229163000 | 0.017201000  |
| 15 | -0.326409000 | 0.938065000  | 0.004389000  |
| 6  | -0.450284000 | 2.465600000  | 1.067404000  |
| 1  | -1.517718000 | 2.725402000  | 1.092808000  |
| 6  | 0.253941000  | 3.503255000  | 0.170756000  |
| 1  | 0.133364000  | 4.509484000  | 0.586995000  |
| 1  | 1.333288000  | 3.299288000  | 0.142809000  |
| 6  | -0.365056000 | 3.394083000  | -1.228320000 |
| 1  | 0.230959000  | 3.919667000  | -1.981161000 |
| 1  | -1.352201000 | 3.872081000  | -1.215811000 |
| 6  | -0.546421000 | 1.898082000  | -1.625155000 |
| 1  | 0.284265000  | 1.589838000  | -2.268952000 |
| 6  | -1.865912000 | 1.664730000  | -2.372792000 |
| 1  | -2.731264000 | 1.900890000  | -1.745036000 |
| 1  | -1.983019000 | 0.638384000  | -2.730892000 |
| 1  | -1.900135000 | 2.323157000  | -3.248535000 |
| 6  | 0.082078000  | 2.403753000  | 2.498681000  |
| 1  | 1.168646000  | 2.273097000  | 2.514003000  |

|   |              |              |              |
|---|--------------|--------------|--------------|
| 1 | -0.369729000 | 1.593558000  | 3.079840000  |
| 1 | -0.141118000 | 3.345236000  | 3.012490000  |
| 6 | -1.790790000 | -0.136339000 | 0.261877000  |
| 6 | -2.765464000 | 0.179465000  | 1.217214000  |
| 1 | -2.678337000 | 1.079890000  | 1.816147000  |
| 6 | -3.870394000 | -0.652078000 | 1.417581000  |
| 1 | -4.615772000 | -0.386392000 | 2.161159000  |
| 6 | -4.013678000 | -1.809925000 | 0.658664000  |
| 1 | -4.873557000 | -2.457275000 | 0.801431000  |
| 6 | -3.041911000 | -2.138581000 | -0.289417000 |
| 1 | -3.157201000 | -3.042117000 | -0.883168000 |
| 6 | -1.923117000 | -1.326692000 | -0.495805000 |
| 6 | -0.877402000 | -1.752268000 | -1.507896000 |
| 1 | -0.559755000 | -0.919485000 | -2.141240000 |
| 1 | -1.286768000 | -2.526450000 | -2.169027000 |
| 8 | 0.336011000  | -2.241611000 | -0.908399000 |
| 6 | 0.210733000  | -3.576375000 | -0.407652000 |
| 1 | -0.167615000 | -4.242886000 | -1.193116000 |
| 1 | 1.209741000  | -3.907615000 | -0.120104000 |
| 1 | -0.457380000 | -3.623379000 | 0.460504000  |
| 6 | 3.718944000  | -1.005489000 | 0.487139000  |
| 1 | 4.489125000  | -1.781115000 | 0.427175000  |
| 6 | 3.233610000  | -0.685864000 | -0.915041000 |
| 6 | 3.007450000  | 0.605604000  | -1.311188000 |
| 1 | 3.364819000  | 1.450688000  | -0.727288000 |
| 6 | 1.443385000  | -0.659400000 | 1.816522000  |
| 6 | 2.629314000  | -1.575389000 | 1.518644000  |
| 1 | 3.197535000  | -1.731715000 | 2.443662000  |
| 1 | 2.299628000  | -2.560815000 | 1.181682000  |
| 1 | 3.099183000  | -1.511155000 | -1.612054000 |
| 1 | 2.714157000  | 0.825103000  | -2.334593000 |
| 1 | 4.179605000  | -0.116794000 | 0.930979000  |
| 1 | 0.560865000  | -1.192972000 | 2.176051000  |
| 1 | 1.699170000  | 0.155843000  | 2.495673000  |

**20**  
E + ZPE = -2666.175497

|    |              |              |              |
|----|--------------|--------------|--------------|
| 28 | 1.431618000  | -0.455233000 | -0.211370000 |
| 15 | -0.436238000 | 0.756590000  | -0.024957000 |
| 6  | -0.582032000 | 1.974045000  | 1.410754000  |
| 1  | -1.591133000 | 1.823810000  | 1.810343000  |
| 6  | -0.520588000 | 3.368318000  | 0.741726000  |
| 1  | -0.973681000 | 4.120554000  | 1.397336000  |
| 1  | 0.527372000  | 3.663321000  | 0.600919000  |
| 6  | -1.227479000 | 3.293384000  | -0.618917000 |
| 1  | -1.056783000 | 4.197662000  | -1.214120000 |
| 1  | -2.313180000 | 3.210096000  | -0.479802000 |
| 6  | -0.698742000 | 2.050648000  | -1.370189000 |
| 1  | 0.316288000  | 2.271448000  | -1.721205000 |
| 6  | -1.537980000 | 1.604714000  | -2.569388000 |
| 1  | -2.559331000 | 1.340382000  | -2.279230000 |
| 1  | -1.094787000 | 0.741094000  | -3.078071000 |
| 1  | -1.596995000 | 2.419777000  | -3.299088000 |
| 6  | 0.412385000  | 1.773684000  | 2.558569000  |
| 1  | 1.447775000  | 1.913941000  | 2.233620000  |
| 1  | 0.324003000  | 0.777130000  | 3.005786000  |
| 1  | 0.214654000  | 2.504483000  | 3.350869000  |
| 6  | -1.969938000 | -0.273421000 | 0.049449000  |
| 6  | -3.203468000 | 0.331150000  | 0.348522000  |
| 1  | -3.255698000 | 1.397809000  | 0.539681000  |
| 6  | -4.386277000 | -0.405794000 | 0.397985000  |
| 1  | -5.323369000 | 0.093587000  | 0.624697000  |

|   |              |              |              |
|---|--------------|--------------|--------------|
| 6 | -4.356054000 | -1.778232000 | 0.161233000  |
| 1 | -5.267869000 | -2.365730000 | 0.206668000  |
| 6 | -3.140760000 | -2.396945000 | -0.125942000 |
| 1 | -3.115663000 | -3.469293000 | -0.302670000 |
| 6 | -1.949675000 | -1.665044000 | -0.198763000 |
| 6 | -0.693351000 | -2.416125000 | -0.575913000 |
| 1 | -0.345850000 | -2.155567000 | -1.580594000 |
| 1 | -0.879176000 | -3.495520000 | -0.557167000 |
| 8 | 0.442298000  | -2.145100000 | 0.278478000  |
| 6 | 0.260203000  | -2.539267000 | 1.652478000  |
| 1 | 0.011987000  | -3.604586000 | 1.690910000  |
| 1 | 1.210892000  | -2.366408000 | 2.158371000  |
| 1 | -0.532362000 | -1.954468000 | 2.128850000  |
| 6 | 4.392695000  | -0.419617000 | 0.034415000  |
| 1 | 5.110783000  | -0.742899000 | 0.794071000  |
| 6 | 3.319726000  | -1.466535000 | -0.170087000 |
| 6 | 2.685145000  | -1.641545000 | -1.374504000 |
| 1 | 3.008304000  | -1.090062000 | -2.254134000 |
| 6 | 2.476316000  | 1.118490000  | -0.453427000 |
| 6 | 3.706192000  | 0.900136000  | 0.431365000  |
| 1 | 4.405123000  | 1.744802000  | 0.353560000  |
| 1 | 3.410079000  | 0.850036000  | 1.488020000  |
| 1 | 3.167466000  | -2.203209000 | 0.618812000  |
| 1 | 2.078277000  | -2.523086000 | -1.561513000 |
| 1 | 4.947889000  | -0.279067000 | -0.900241000 |
| 1 | 1.970606000  | 2.047581000  | -0.174525000 |
| 1 | 2.756369000  | 1.218582000  | -1.511444000 |

S7

E + ZPE = -2666.155243

|    |              |              |              |
|----|--------------|--------------|--------------|
| 28 | 1.564660000  | -0.717078000 | 0.289076000  |
| 15 | 0.037973000  | 0.899722000  | -0.042586000 |
| 6  | 0.390695000  | 2.439398000  | 0.959901000  |
| 1  | -0.525146000 | 3.045059000  | 0.927103000  |
| 6  | 1.445716000  | 3.110752000  | 0.055611000  |
| 1  | 1.654181000  | 4.126226000  | 0.409305000  |
| 1  | 2.390696000  | 2.555469000  | 0.131317000  |
| 6  | 0.923420000  | 3.117367000  | -1.394150000 |
| 1  | 1.751167000  | 3.167981000  | -2.108959000 |
| 1  | 0.319882000  | 4.016992000  | -1.555632000 |
| 6  | 0.022467000  | 1.868634000  | -1.671884000 |
| 1  | 0.471092000  | 1.243575000  | -2.447481000 |
| 6  | -1.379335000 | 2.281854000  | -2.146332000 |
| 1  | -1.905135000 | 2.880683000  | -1.395040000 |
| 1  | -2.013022000 | 1.425697000  | -2.391779000 |
| 1  | -1.281044000 | 2.894574000  | -3.049739000 |
| 6  | 0.848384000  | 2.287652000  | 2.410969000  |
| 1  | 1.748606000  | 1.666756000  | 2.487947000  |
| 1  | 0.075195000  | 1.855930000  | 3.054744000  |
| 1  | 1.095412000  | 3.273222000  | 2.820955000  |
| 6  | -1.682662000 | 0.317188000  | 0.233555000  |
| 6  | -2.468126000 | 0.887700000  | 1.243148000  |
| 1  | -2.074346000 | 1.690632000  | 1.858092000  |
| 6  | -3.772661000 | 0.444115000  | 1.476800000  |
| 1  | -4.365137000 | 0.902909000  | 2.262663000  |
| 6  | -4.306209000 | -0.576366000 | 0.695652000  |
| 1  | -5.320907000 | -0.924041000 | 0.864104000  |
| 6  | -3.528653000 | -1.153457000 | -0.311497000 |
| 1  | -3.951145000 | -1.944340000 | -0.926399000 |
| 6  | -2.217919000 | -0.731810000 | -0.554980000 |
| 6  | -1.414170000 | -1.409088000 | -1.651651000 |
| 1  | -0.905076000 | -0.676284000 | -2.284219000 |

|   |              |              |              |
|---|--------------|--------------|--------------|
| 1 | -2.085110000 | -1.987353000 | -2.300903000 |
| 8 | -0.371679000 | -2.261198000 | -1.160740000 |
| 6 | -0.842838000 | -3.528749000 | -0.708262000 |
| 1 | -1.338371000 | -4.074129000 | -1.522662000 |
| 1 | 0.032630000  | -4.095973000 | -0.384007000 |
| 1 | -1.542428000 | -3.430671000 | 0.132303000  |
| 6 | 2.361957000  | -0.288214000 | -1.493682000 |
| 1 | 2.493974000  | 0.724655000  | -1.857353000 |
| 6 | 3.354571000  | -0.815786000 | -0.648324000 |
| 6 | 3.106876000  | -2.059682000 | -0.058228000 |
| 1 | 2.556012000  | -2.823407000 | -0.605225000 |
| 6 | 0.445016000  | -1.174905000 | 1.961022000  |
| 6 | 1.647693000  | -1.842277000 | 2.055838000  |
| 1 | 2.459352000  | -1.449323000 | 2.663664000  |
| 1 | 1.698033000  | -2.904931000 | 1.843292000  |
| 1 | 4.133772000  | -0.169451000 | -0.247334000 |
| 1 | 3.786894000  | -2.433652000 | 0.698835000  |
| 1 | 1.803829000  | -0.950838000 | -2.155089000 |
| 1 | -0.447750000 | -1.699544000 | 1.638116000  |
| 1 | 0.271933000  | -0.280454000 | 2.548929000  |

S8

E + ZPE = -2666.138068

|    |              |              |              |
|----|--------------|--------------|--------------|
| 28 | 1.555646000  | -0.363703000 | 0.163470000  |
| 15 | -0.143625000 | 0.961888000  | -0.037598000 |
| 6  | -0.018528000 | 2.507035000  | 1.004497000  |
| 1  | -1.030991000 | 2.930540000  | 1.054882000  |
| 6  | 0.814772000  | 3.408330000  | 0.069882000  |
| 1  | 0.860850000  | 4.427754000  | 0.468488000  |
| 1  | 1.849983000  | 3.041231000  | 0.022650000  |
| 6  | 0.153652000  | 3.374813000  | -1.314835000 |
| 1  | 0.815960000  | 3.771774000  | -2.090648000 |
| 1  | -0.733744000 | 4.018802000  | -1.297466000 |
| 6  | -0.296698000 | 1.924105000  | -1.668407000 |
| 1  | 0.421152000  | 1.474403000  | -2.359802000 |
| 6  | -1.685325000 | 1.906698000  | -2.321912000 |
| 1  | -2.454036000 | 2.295966000  | -1.646246000 |
| 1  | -1.996460000 | 0.908923000  | -2.642335000 |
| 1  | -1.668547000 | 2.547400000  | -3.211226000 |
| 6  | 0.546662000  | 2.378166000  | 2.418312000  |
| 1  | 1.558648000  | 1.958068000  | 2.407946000  |
| 1  | -0.078453000 | 1.750227000  | 3.061238000  |
| 1  | 0.604198000  | 3.368976000  | 2.882306000  |
| 6  | -1.728742000 | 0.088968000  | 0.275437000  |
| 6  | -2.597634000 | 0.544011000  | 1.275703000  |
| 1  | -2.348477000 | 1.422255000  | 1.862238000  |
| 6  | -3.801296000 | -0.114698000 | 1.539240000  |
| 1  | -4.459967000 | 0.258184000  | 2.317810000  |
| 6  | -4.152175000 | -1.237448000 | 0.796066000  |
| 1  | -5.089413000 | -1.751809000 | 0.985606000  |
| 6  | -3.290144000 | -1.701230000 | -0.200151000 |
| 1  | -3.569660000 | -2.574116000 | -0.785090000 |
| 6  | -2.074734000 | -1.065371000 | -0.470964000 |
| 6  | -1.169901000 | -1.644912000 | -1.545207000 |
| 1  | -0.742433000 | -0.860435000 | -2.176084000 |
| 1  | -1.749777000 | -2.310785000 | -2.198798000 |
| 8  | -0.037241000 | -2.354767000 | -1.028571000 |
| 6  | -0.357196000 | -3.643738000 | -0.509852000 |
| 1  | -0.817930000 | -4.271904000 | -1.284303000 |
| 1  | 0.583831000  | -4.101792000 | -0.196556000 |
| 1  | -1.034978000 | -3.582215000 | 0.351054000  |
| 6  | 2.444482000  | -0.391399000 | -1.753454000 |

|   |             |              |              |
|---|-------------|--------------|--------------|
| 1 | 2.477479000 | 0.472689000  | -2.409507000 |
| 6 | 3.320882000 | -0.466817000 | -0.694625000 |
| 6 | 3.312804000 | -1.630198000 | 0.237866000  |
| 1 | 2.964380000 | -2.547657000 | -0.239398000 |
| 1 | 1.039279000 | -1.037570000 | 1.825718000  |
| 6 | 2.458152000 | -1.493776000 | 1.782871000  |
| 1 | 3.120432000 | -0.876214000 | 2.390023000  |
| 1 | 2.574395000 | -2.544577000 | 2.052074000  |
| 1 | 3.997227000 | 0.359795000  | -0.479843000 |
| 1 | 4.301066000 | -1.795005000 | 0.665176000  |
| 1 | 1.929528000 | -1.270013000 | -2.135468000 |
| 1 | 0.285636000 | -1.820523000 | 1.743808000  |
| 1 | 0.814439000 | -0.336247000 | 2.625734000  |

**S9**

E + ZPE = -2666.138099

|    |              |              |              |
|----|--------------|--------------|--------------|
| 28 | 1.550365000  | -0.314522000 | 0.144197000  |
| 15 | -0.177919000 | 0.963808000  | -0.036175000 |
| 6  | -0.097452000 | 2.511288000  | 1.006970000  |
| 1  | -1.123121000 | 2.900650000  | 1.063972000  |
| 6  | 0.697170000  | 3.443960000  | 0.069606000  |
| 1  | 0.708364000  | 4.463543000  | 0.470311000  |
| 1  | 1.744789000  | 3.115167000  | 0.013678000  |
| 6  | 0.026665000  | 3.387831000  | -1.309175000 |
| 1  | 0.658087000  | 3.827185000  | -2.087944000 |
| 1  | -0.895277000 | 3.981079000  | -1.277071000 |
| 6  | -0.344244000 | 1.918202000  | -1.670997000 |
| 1  | 0.414587000  | 1.504074000  | -2.341056000 |
| 6  | -1.712738000 | 1.831206000  | -2.359642000 |
| 1  | -2.516709000 | 2.181382000  | -1.704004000 |
| 1  | -1.965188000 | 0.819158000  | -2.686727000 |
| 1  | -1.705739000 | 2.471655000  | -3.249261000 |
| 6  | 0.479348000  | 2.397057000  | 2.417166000  |
| 1  | 1.504374000  | 2.010366000  | 2.399757000  |
| 1  | -0.121394000 | 1.746723000  | 3.061054000  |
| 1  | 0.506558000  | 3.387860000  | 2.883933000  |
| 6  | -1.738440000 | 0.047128000  | 0.275719000  |
| 6  | -2.627135000 | 0.486915000  | 1.265642000  |
| 1  | -2.407056000 | 1.376721000  | 1.846301000  |
| 6  | -3.813722000 | -0.202583000 | 1.527234000  |
| 1  | -4.488013000 | 0.159153000  | 2.297639000  |
| 6  | -4.127873000 | -1.341663000 | 0.792553000  |
| 1  | -5.051860000 | -1.880097000 | 0.980279000  |
| 6  | -3.245483000 | -1.791090000 | -0.192254000 |
| 1  | -3.495675000 | -2.677623000 | -0.769919000 |
| 6  | -2.046093000 | -1.124467000 | -0.460599000 |
| 6  | -1.117193000 | -1.692809000 | -1.520089000 |
| 1  | -0.703514000 | -0.905159000 | -2.156175000 |
| 1  | -1.674465000 | -2.380473000 | -2.170768000 |
| 8  | 0.027975000  | -2.368623000 | -0.985498000 |
| 6  | -0.265845000 | -3.655386000 | -0.445631000 |
| 1  | -0.710602000 | -4.306036000 | -1.210771000 |
| 0  | 0.683889000  | -4.087509000 | -0.122079000 |
| 1  | -0.947362000 | -3.593521000 | 0.412154000  |
| 6  | 2.471084000  | -0.403933000 | -1.785119000 |
| 1  | 2.484552000  | 0.434254000  | -2.474912000 |
| 6  | 3.323741000  | -0.408428000 | -0.708697000 |
| 6  | 3.362332000  | -1.552873000 | 0.265026000  |
| 1  | 3.014876000  | -2.483214000 | -0.189884000 |
| 6  | 1.121569000  | -0.986706000 | 1.819373000  |
| 6  | 2.579423000  | -1.367155000 | 1.770432000  |
| 1  | 3.202232000  | -0.671402000 | 2.335757000  |

|   |             |              |              |
|---|-------------|--------------|--------------|
| 1 | 2.740650000 | -2.379413000 | 2.148957000  |
| 1 | 3.977341000 | 0.442722000  | -0.520207000 |
| 1 | 4.382222000 | -1.699860000 | 0.623531000  |
| 1 | 1.975300000 | -1.308533000 | -2.129113000 |
| 1 | 0.421392000 | -1.821589000 | 1.765377000  |
| 1 | 0.870839000 | -0.307752000 | 2.631194000  |

**S10**

E + ZPE = -2666.137107

|    |              |              |              |
|----|--------------|--------------|--------------|
| 28 | -1.388744000 | -0.474742000 | 0.023189000  |
| 15 | 0.220500000  | 0.940596000  | 0.016418000  |
| 6  | 0.136366000  | 2.479947000  | -1.042988000 |
| 1  | 1.167513000  | 2.846671000  | -1.136022000 |
| 6  | -0.604427000 | 3.449202000  | -0.098963000 |
| 1  | -0.592878000 | 4.463064000  | -0.513882000 |
| 1  | -1.659749000 | 3.153925000  | -0.011119000 |
| 6  | 0.098087000  | 3.384265000  | 1.261430000  |
| 1  | -0.470612000 | 3.898102000  | 2.043342000  |
| 1  | 1.067268000  | 3.893391000  | 1.186156000  |
| 6  | 0.341681000  | 1.901413000  | 1.655534000  |
| 1  | -0.501447000 | 1.547780000  | 2.259469000  |
| 6  | 1.637161000  | 1.715195000  | 2.453945000  |
| 1  | 2.516350000  | 1.995428000  | 1.864927000  |
| 1  | 1.780485000  | 0.688823000  | 2.803176000  |
| 1  | 1.609037000  | 2.360461000  | 3.339637000  |
| 6  | -0.482170000 | 2.366645000  | -2.435318000 |
| 1  | -1.513427000 | 2.001614000  | -2.386798000 |
| 1  | 0.089037000  | 1.703908000  | -3.092999000 |
| 1  | -0.503304000 | 3.355931000  | -2.905798000 |
| 6  | 1.793149000  | 0.033997000  | -0.267533000 |
| 6  | 2.750015000  | 0.510447000  | -1.173023000 |
| 1  | 2.580871000  | 1.433925000  | -1.716564000 |
| 6  | 3.940867000  | -0.185159000 | -1.396371000 |
| 1  | 4.668584000  | 0.206023000  | -2.100947000 |
| 6  | 4.189507000  | -1.369877000 | -0.710269000 |
| 1  | 5.114874000  | -1.914672000 | -0.870532000 |
| 6  | 3.237621000  | -1.859403000 | 0.186899000  |
| 1  | 3.434462000  | -2.784943000 | 0.722504000  |
| 6  | 2.034796000  | -1.185050000 | 0.416644000  |
| 6  | 1.036126000  | -1.793305000 | 1.384941000  |
| 1  | 0.649023000  | -1.054089000 | 2.091453000  |
| 1  | 1.520457000  | -2.585594000 | 1.969283000  |
| 8  | -0.137872000 | -2.334688000 | 0.750988000  |
| 6  | 0.100101000  | -3.567044000 | 0.062737000  |
| 1  | 0.502173000  | -4.314868000 | 0.757321000  |
| 1  | -0.864886000 | -3.912845000 | -0.313128000 |
| 1  | 0.795840000  | -3.435976000 | -0.774047000 |
| 6  | -2.567485000 | -0.638926000 | 1.881716000  |
| 1  | -2.397280000 | 0.044489000  | 2.708648000  |
| 6  | -3.228137000 | -0.219667000 | 0.756410000  |
| 6  | -3.577197000 | -1.180460000 | -0.368712000 |
| 1  | -3.418361000 | -2.218775000 | -0.053510000 |
| 6  | -1.320912000 | -0.910896000 | -1.787014000 |
| 6  | -2.848392000 | -0.893507000 | -1.772544000 |
| 1  | -3.216486000 | 0.072928000  | -2.130319000 |
| 1  | -3.241792000 | -1.665402000 | -2.445726000 |
| 1  | -3.605832000 | 0.799061000  | 0.679453000  |
| 1  | -4.645724000 | -1.085015000 | -0.589029000 |
| 1  | -2.401268000 | -1.692622000 | 2.088262000  |
| 1  | -0.883372000 | -1.910535000 | -1.876932000 |
| 1  | -0.899774000 | -0.255745000 | -2.544879000 |

**S11**

E + ZPE = -2666.174981

|    |              |              |              |
|----|--------------|--------------|--------------|
| 28 | 1.474786000  | -0.457722000 | 0.222614000  |
| 15 | -0.407505000 | 0.757743000  | 0.116792000  |
| 6  | -0.693898000 | 1.940800000  | 1.556440000  |
| 1  | -1.733945000 | 1.786736000  | 1.864675000  |
| 6  | -0.568007000 | 3.349492000  | 0.927471000  |
| 1  | -1.089602000 | 4.086879000  | 1.547912000  |
| 1  | 0.488215000  | 3.647444000  | 0.903968000  |
| 6  | -1.128974000 | 3.303685000  | -0.500912000 |
| 1  | -0.904375000 | 4.222337000  | -1.054944000 |
| 1  | -2.222850000 | 3.210847000  | -0.477634000 |
| 6  | -0.518277000 | 2.080514000  | -1.222580000 |
| 1  | 0.525486000  | 2.311824000  | -1.463492000 |
| 6  | -1.227874000 | 1.668074000  | -2.514428000 |
| 1  | -2.276577000 | 1.409408000  | -2.341472000 |
| 1  | -0.740479000 | 0.810853000  | -2.992472000 |
| 1  | -1.200990000 | 2.499265000  | -3.227690000 |
| 6  | 0.204533000  | 1.707182000  | 2.775586000  |
| 1  | 1.264703000  | 1.813471000  | 2.524669000  |
| 1  | 0.052018000  | 0.712632000  | 3.209783000  |
| 1  | -0.028336000 | 2.442244000  | 3.554344000  |
| 6  | -1.939290000 | -0.261014000 | -0.046947000 |
| 1  | -3.203172000 | 0.302070000  | 0.194686000  |
| 6  | -3.289820000 | 1.336190000  | 0.511338000  |
| 6  | -4.373790000 | -0.437902000 | 0.024172000  |
| 1  | -5.336856000 | 0.026404000  | 0.213506000  |
| 6  | -4.299772000 | -1.767268000 | -0.385571000 |
| 1  | -5.203600000 | -2.354531000 | -0.515398000 |
| 6  | -3.052468000 | -2.345595000 | -0.617587000 |
| 1  | -2.993550000 | -3.386683000 | -0.924977000 |
| 6  | -1.872459000 | -1.609972000 | -0.464125000 |
| 6  | -0.559897000 | -2.301065000 | -0.749763000 |
| 1  | -0.050806000 | -1.886582000 | -1.625464000 |
| 1  | -0.723086000 | -3.368763000 | -0.931681000 |
| 8  | 0.404586000  | -2.174154000 | 0.323793000  |
| 6  | -0.037919000 | -2.745198000 | 1.573157000  |
| 1  | -0.301962000 | -3.795579000 | 1.415493000  |
| 1  | 0.799180000  | -2.677264000 | 2.267664000  |
| 1  | -0.898182000 | -2.198887000 | 1.969760000  |
| 6  | 3.136870000  | -1.594888000 | 0.792168000  |
| 1  | 2.705107000  | -2.487989000 | 1.232394000  |
| 6  | 3.178118000  | -1.438346000 | -0.572094000 |
| 6  | 4.043976000  | -0.397999000 | -1.253372000 |
| 1  | 4.958828000  | -0.251021000 | -0.668151000 |
| 6  | 2.526986000  | 1.120543000  | 0.010772000  |
| 6  | 3.259081000  | 0.926882000  | -1.318115000 |
| 1  | 2.540843000  | 0.887565000  | -2.148869000 |
| 1  | 3.931095000  | 1.768493000  | -1.534786000 |
| 1  | 3.237284000  | 1.164532000  | 0.848303000  |
| 1  | 1.981423000  | 2.067140000  | 0.026954000  |
| 1  | 2.708445000  | -2.196053000 | -1.200238000 |
| 1  | 4.345334000  | -0.739283000 | -2.248270000 |
| 1  | 3.796341000  | -1.018317000 | 1.435618000  |

**S12**

E + ZPE = -2123.241496

|    |              |             |              |
|----|--------------|-------------|--------------|
| 28 | 0.062901000  | 0.046007000 | -0.051731000 |
| 6  | -2.037343000 | 0.418894000 | -0.544335000 |
| 1  | -2.015015000 | 0.825319000 | -1.557442000 |

|    |              |              |              |
|----|--------------|--------------|--------------|
| 15 | 2.178023000  | 0.128540000  | -0.334816000 |
| 1  | 2.927081000  | -1.065508000 | -0.310531000 |
| 1  | 2.937788000  | 0.888412000  | 0.579879000  |
| 1  | 2.649485000  | 0.680041000  | -1.542859000 |
| 6  | -1.349439000 | 1.315724000  | 0.437863000  |
| 6  | -0.311420000 | 2.136375000  | 0.053781000  |
| 1  | -0.165317000 | 2.419727000  | -0.986651000 |
| 6  | -0.133604000 | -1.579666000 | -0.944757000 |
| 6  | -1.569182000 | -1.251784000 | -0.677582000 |
| 1  | -1.963178000 | -1.740949000 | 0.212450000  |
| 1  | -2.200955000 | -1.478798000 | -1.537703000 |
| 1  | 0.149733000  | -1.591567000 | -1.999166000 |
| 1  | -1.663043000 | 1.271318000  | 1.478918000  |
| 1  | 0.172042000  | 2.777019000  | 0.786285000  |
| 1  | -3.073512000 | 0.257458000  | -0.246362000 |
| 8  | -0.013453000 | -0.973021000 | 2.100240000  |
| 1  | -0.109985000 | -0.551874000 | 2.969994000  |
| 1  | 0.188604000  | -1.903540000 | 2.291678000  |
| 1  | 0.248238000  | -2.456444000 | -0.419529000 |

**S13**

E + ZPE = -2354.223058

|    |              |              |              |
|----|--------------|--------------|--------------|
| 28 | -1.204878000 | 0.058230000  | -0.120448000 |
| 6  | -1.554125000 | -2.071399000 | 0.132535000  |
| 1  | -0.873814000 | -2.565919000 | -0.562384000 |
| 15 | -0.571423000 | 1.938138000  | -0.945526000 |
| 1  | 0.095316000  | 2.864303000  | -0.117357000 |
| 1  | -1.546522000 | 2.795463000  | -1.498598000 |
| 1  | 0.337533000  | 1.885417000  | -2.020188000 |
| 6  | -2.586106000 | -1.256075000 | -0.568032000 |
| 6  | -2.311179000 | -0.634973000 | -1.769786000 |
| 1  | -1.509149000 | -0.981927000 | -2.419200000 |
| 6  | 0.245225000  | -0.089571000 | 1.090703000  |
| 6  | -0.529265000 | -1.337134000 | 1.375037000  |
| 1  | -1.183057000 | -1.234684000 | 2.239172000  |
| 1  | 0.121489000  | -2.202837000 | 1.494195000  |
| 1  | 0.139374000  | 0.661305000  | 1.876542000  |
| 1  | -3.543153000 | -1.104823000 | -0.073040000 |
| 1  | -3.077558000 | -0.036799000 | -2.255084000 |
| 1  | -2.018239000 | -2.816337000 | 0.777936000  |
| 6  | 1.628665000  | -0.156098000 | 0.565509000  |
| 6  | 2.537508000  | 0.867141000  | 0.895298000  |
| 1  | 2.222197000  | 1.667019000  | 1.562064000  |
| 6  | 2.073909000  | -1.192099000 | -0.278280000 |
| 1  | 1.403749000  | -2.004092000 | -0.549181000 |
| 6  | 3.378876000  | -1.206469000 | -0.764628000 |
| 6  | 3.843337000  | 0.852906000  | 0.409071000  |
| 6  | 4.268246000  | -0.183456000 | -0.424440000 |
| 1  | 4.531483000  | 1.645168000  | 0.688683000  |
| 1  | 3.704834000  | -2.019536000 | -1.406606000 |
| 1  | 5.286479000  | -0.199042000 | -0.800981000 |
| 8  | -2.705276000 | 1.083247000  | 1.586230000  |
| 1  | -3.660180000 | 1.244499000  | 1.515081000  |
| 1  | -2.451201000 | 1.477703000  | 2.436608000  |

**S14**

E + ZPE = -2354.212289

|    |              |              |             |
|----|--------------|--------------|-------------|
| 28 | 1.595190000  | -0.051491000 | 0.001550000 |
| 6  | -0.093952000 | -0.822085000 | 1.267755000 |
| 1  | -0.380614000 | 0.043051000  | 1.868879000 |

|    |              |              |              |
|----|--------------|--------------|--------------|
| 15 | 2.868860000  | 1.567947000  | -0.543333000 |
| 1  | 2.917400000  | 2.004171000  | -1.884203000 |
| 1  | 4.253459000  | 1.432185000  | -0.303122000 |
| 1  | 2.653105000  | 2.809046000  | 0.090438000  |
| 6  | 1.328372000  | -1.237230000 | 1.554457000  |
| 6  | 2.254215000  | -0.347069000 | 2.044590000  |
| 1  | 1.951939000  | 0.594694000  | 2.496866000  |
| 6  | 0.209705000  | 0.519212000  | -1.095465000 |
| 6  | -0.592233000 | -0.510299000 | -0.318627000 |
| 1  | -0.531418000 | -1.476724000 | -0.822433000 |
| 1  | 0.327135000  | 0.282910000  | -2.156160000 |
| 1  | 1.603094000  | -2.275876000 | 1.378872000  |
| 1  | 3.264681000  | -0.676535000 | 2.271288000  |
| 1  | -0.768895000 | -1.645878000 | 1.512047000  |
| 8  | 2.079039000  | -1.824026000 | -1.342739000 |
| 1  | 2.653121000  | -2.581843000 | -1.145069000 |
| 1  | 2.004141000  | -1.799410000 | -2.310651000 |
| 1  | -0.137133000 | 1.546583000  | -0.971447000 |
| 6  | -2.059412000 | -0.122583000 | -0.174486000 |
| 6  | -3.039270000 | -1.002285000 | -0.647341000 |
| 1  | -2.746193000 | -1.938793000 | -1.116158000 |
| 6  | -2.456544000 | 1.081126000  | 0.422461000  |
| 1  | -1.713306000 | 1.783818000  | 0.794240000  |
| 6  | -3.808977000 | 1.396735000  | 0.545101000  |
| 6  | -4.393842000 | -0.685915000 | -0.525225000 |
| 6  | -4.781594000 | 0.513402000  | 0.071314000  |
| 1  | -5.142513000 | -1.378688000 | -0.898073000 |
| 1  | -4.102767000 | 2.333204000  | 1.010065000  |
| 1  | -5.834594000 | 0.760776000  | 0.165911000  |

**21**  
E + ZPE = -2897.110649

|    |              |              |              |
|----|--------------|--------------|--------------|
| 28 | 0.509648000  | 1.284751000  | 0.568456000  |
| 15 | -0.691599000 | -0.513991000 | 0.800725000  |
| 6  | 0.090661000  | -2.183698000 | 1.126579000  |
| 1  | 0.348434000  | -2.654125000 | 0.174324000  |
| 6  | -0.972836000 | -3.017174000 | 1.911492000  |
| 1  | -1.361445000 | -3.831483000 | 1.292212000  |
| 1  | -0.475854000 | -3.491209000 | 2.764336000  |
| 6  | -2.132548000 | -2.116361000 | 2.400668000  |
| 1  | -2.467584000 | -2.404290000 | 3.403568000  |
| 1  | -3.001147000 | -2.219853000 | 1.739690000  |
| 6  | -1.687730000 | -0.640870000 | 2.398380000  |
| 1  | -0.926963000 | -0.494052000 | 3.177669000  |
| 6  | -2.839338000 | 0.331566000  | 2.648817000  |
| 1  | -3.603086000 | 0.262881000  | 1.866791000  |
| 1  | -2.503847000 | 1.371799000  | 2.723742000  |
| 1  | -3.325205000 | 0.082548000  | 3.599009000  |
| 6  | 1.386356000  | -2.016282000 | 1.940862000  |
| 1  | 1.207686000  | -1.494425000 | 2.888226000  |
| 1  | 2.155944000  | -1.476821000 | 1.385249000  |
| 1  | 1.785288000  | -3.006635000 | 2.186784000  |
| 6  | -1.911858000 | -0.709443000 | -0.568323000 |
| 6  | -2.129867000 | -1.955219000 | -1.174373000 |
| 1  | -1.588013000 | -2.830614000 | -0.833560000 |
| 6  | -3.049986000 | -2.103877000 | -2.214939000 |
| 1  | -3.202812000 | -3.081176000 | -2.663125000 |
| 6  | -3.771948000 | -1.001871000 | -2.663626000 |
| 1  | -4.495904000 | -1.107393000 | -3.465930000 |
| 6  | -3.558250000 | 0.245654000  | -2.074600000 |
| 1  | -4.124861000 | 1.105577000  | -2.423621000 |
| 6  | -2.631980000 | 0.417678000  | -1.040582000 |

|   |              |              |              |
|---|--------------|--------------|--------------|
| 6 | -2.422987000 | 1.811212000  | -0.477706000 |
| 1 | -2.382271000 | 1.807987000  | 0.611701000  |
| 1 | -3.257006000 | 2.461142000  | -0.771863000 |
| 8 | -1.187122000 | 2.420952000  | -0.890610000 |
| 6 | -1.225028000 | 2.881707000  | -2.244614000 |
| 1 | -2.068419000 | 3.569235000  | -2.387488000 |
| 1 | -0.296772000 | 3.422921000  | -2.431527000 |
| 1 | -1.312912000 | 2.049663000  | -2.953371000 |
| 6 | 2.429667000  | 2.882047000  | 0.506185000  |
| 1 | 2.820234000  | 3.884435000  | 0.301556000  |
| 6 | 1.256418000  | 2.971237000  | 1.455968000  |
| 6 | 1.102600000  | 2.054962000  | 2.467837000  |
| 1 | 1.914708000  | 1.392956000  | 2.760683000  |
| 6 | 1.511029000  | 0.829399000  | -0.977444000 |
| 6 | 2.104900000  | 2.251624000  | -0.919384000 |
| 1 | 3.054536000  | 2.253466000  | -1.465517000 |
| 1 | 1.443666000  | 2.947886000  | -1.437221000 |
| 1 | 0.562177000  | 3.802756000  | 1.344793000  |
| 1 | 0.294143000  | 2.158272000  | 3.188269000  |
| 1 | 3.232137000  | 2.309606000  | 0.980418000  |
| 1 | 0.751372000  | 0.754824000  | -1.759876000 |
| 6 | 2.442418000  | -0.315534000 | -1.066614000 |
| 6 | 3.734235000  | -0.308316000 | -0.504195000 |
| 1 | 4.092339000  | 0.566225000  | 0.029996000  |
| 6 | 2.039461000  | -1.467737000 | -1.772097000 |
| 1 | 1.055848000  | -1.485364000 | -2.236701000 |
| 6 | 2.883757000  | -2.566675000 | -1.904325000 |
| 6 | 4.581024000  | -1.407106000 | -0.635945000 |
| 6 | 4.158888000  | -2.542082000 | -1.332399000 |
| 1 | 5.575333000  | -1.374898000 | -0.200075000 |
| 1 | 2.555943000  | -3.437021000 | -2.465720000 |
| 1 | 4.822771000  | -3.394655000 | -1.439899000 |

**22**  
E + ZPE = -2897.107365

|    |              |              |              |
|----|--------------|--------------|--------------|
| 28 | -0.197262000 | -0.652820000 | -0.835407000 |
| 15 | 1.645972000  | -0.712972000 | 0.281534000  |
| 6  | 1.762789000  | -1.855844000 | 1.753139000  |
| 1  | 2.655402000  | -1.539899000 | 2.310260000  |
| 6  | 2.103543000  | -3.190434000 | 1.061244000  |
| 1  | 2.359559000  | -3.951186000 | 1.806958000  |
| 1  | 1.224864000  | -3.562563000 | 0.516012000  |
| 6  | 3.271823000  | -2.920802000 | 0.105964000  |
| 1  | 3.437730000  | -3.753827000 | -0.584744000 |
| 1  | 4.190861000  | -2.808893000 | 0.694416000  |
| 6  | 3.027635000  | -1.600871000 | -0.684024000 |
| 1  | 2.599412000  | -1.839436000 | -1.663599000 |
| 6  | 4.326151000  | -0.810826000 | -0.889987000 |
| 1  | 4.758694000  | -0.491712000 | 0.063837000  |
| 1  | 4.194841000  | 0.078317000  | -1.512621000 |
| 1  | 5.059158000  | -1.454684000 | -1.389776000 |
| 6  | 0.574853000  | -1.926432000 | 2.711824000  |
| 1  | -0.307326000 | -2.349662000 | 2.221370000  |
| 1  | 0.304137000  | -0.946495000 | 3.117695000  |
| 1  | 0.824874000  | -2.578350000 | 3.556171000  |
| 6  | 2.227134000  | 0.966818000  | 0.738491000  |
| 6  | 2.597905000  | 1.270591000  | 2.054969000  |
| 1  | 2.553847000  | 0.511254000  | 2.828454000  |
| 6  | 3.034307000  | 2.551826000  | 2.401310000  |
| 1  | 3.319175000  | 2.764158000  | 3.427391000  |
| 6  | 3.109569000  | 3.544638000  | 1.428846000  |
| 1  | 3.456755000  | 4.540677000  | 1.686287000  |



|   |              |              |              |
|---|--------------|--------------|--------------|
| 6 | 2.732339000  | 3.254274000  | 0.115785000  |
| 1 | 2.793161000  | 4.030670000  | -0.642972000 |
| 6 | 2.278701000  | 1.983058000  | -0.247595000 |
| 6 | 1.830732000  | 1.740472000  | -1.676467000 |
| 1 | 2.200435000  | 0.786396000  | -2.061877000 |
| 1 | 2.220628000  | 2.530966000  | -2.331035000 |
| 8 | 0.403518000  | 1.667574000  | -1.823770000 |
| 6 | -0.229846000 | 2.947293000  | -1.763443000 |
| 1 | 0.210773000  | 3.627670000  | -2.503966000 |
| 1 | -1.282285000 | 2.796576000  | -2.009690000 |
| 1 | -0.146960000 | 3.395561000  | -0.766052000 |
| 6 | -2.423841000 | -0.990355000 | -1.628952000 |
| 1 | -3.266746000 | -0.699962000 | -2.265210000 |
| 6 | -1.195006000 | -1.179215000 | -2.503489000 |
| 6 | -0.349362000 | -2.242560000 | -2.325300000 |
| 1 | -0.624154000 | -3.090757000 | -1.702190000 |
| 6 | -1.253305000 | -0.018196000 | 0.542302000  |
| 6 | -2.368538000 | 0.159466000  | -0.498769000 |
| 1 | -2.218601000 | 1.105227000  | -1.025239000 |
| 1 | -1.025342000 | -0.465276000 | -3.307586000 |
| 1 | 0.489710000  | -2.399409000 | -2.998265000 |
| 1 | -2.686717000 | -1.937463000 | -1.148768000 |
| 1 | -0.948270000 | 0.923187000  | 1.004759000  |
| 1 | -1.508052000 | -0.750797000 | 1.309612000  |
| 6 | -3.737372000 | 0.227295000  | 0.174854000  |
| 6 | -4.487864000 | 1.405925000  | 0.088149000  |
| 1 | -4.087517000 | 2.261961000  | -0.450205000 |
| 6 | -4.269855000 | -0.861590000 | 0.878883000  |
| 1 | -3.704062000 | -1.785835000 | 0.972376000  |
| 6 | -5.529733000 | -0.776202000 | 1.470534000  |
| 6 | -5.748870000 | 1.492945000  | 0.680388000  |
| 6 | -6.273674000 | 0.401441000  | 1.372377000  |
| 1 | -6.319077000 | 2.413782000  | 0.598117000  |
| 1 | -5.929978000 | -1.630549000 | 2.008850000  |
| 1 | -7.254621000 | 0.467015000  | 1.833555000  |

**23**  
E + ZPE = -2666.176611

|    |              |              |              |
|----|--------------|--------------|--------------|
| 28 | 1.426523000  | -0.495692000 | -0.251744000 |
| 15 | -0.438776000 | 0.757568000  | -0.014275000 |
| 6  | -0.517146000 | 1.791737000  | 1.566438000  |
| 1  | -1.527234000 | 1.633599000  | 1.962239000  |
| 6  | -0.402657000 | 3.252735000  | 1.072077000  |
| 1  | -0.798960000 | 3.938913000  | 1.829027000  |
| 1  | 0.655376000  | 3.512157000  | 0.933142000  |
| 6  | -1.146208000 | 3.377552000  | -0.264550000 |
| 1  | -0.950782000 | 4.340947000  | -0.749138000 |
| 1  | -2.230861000 | 3.321528000  | -0.104790000 |
| 6  | -0.682814000 | 2.218783000  | -1.175529000 |
| 1  | 0.333899000  | 2.450787000  | -1.511670000 |
| 6  | -1.550938000 | 1.963788000  | -2.410066000 |
| 1  | -2.580132000 | 1.705869000  | -2.143388000 |
| 1  | -1.148778000 | 1.155680000  | -3.031315000 |
| 1  | -1.582236000 | 2.867721000  | -3.028377000 |
| 6  | 0.493435000  | 1.411681000  | 2.652976000  |
| 1  | 1.526062000  | 1.520763000  | 2.303673000  |
| 1  | 0.356091000  | 0.380469000  | 2.997058000  |
| 1  | 0.368614000  | 2.065360000  | 3.523679000  |
| 6  | -1.988259000 | -0.243107000 | -0.026499000 |
| 6  | -3.218121000 | 0.368525000  | 0.271004000  |
| 1  | -3.255729000 | 1.426120000  | 0.511198000  |
| 6  | -4.411604000 | -0.352588000 | 0.260844000  |

|   |              |              |              |
|---|--------------|--------------|--------------|
| 1 | -5.347217000 | 0.149364000  | 0.487960000  |
| 6 | -4.394126000 | -1.714114000 | -0.034962000 |
| 1 | -5.315282000 | -2.288662000 | -0.037542000 |
| 6 | -3.180685000 | -2.340670000 | -0.314389000 |
| 1 | -3.165944000 | -3.405983000 | -0.530470000 |
| 6 | -1.978222000 | -1.624509000 | -0.324674000 |
| 6 | -0.712484000 | -2.375942000 | -0.667902000 |
| 1 | -0.306975000 | -2.082553000 | -1.641631000 |
| 1 | -0.908651000 | -3.453150000 | -0.700428000 |
| 8 | 0.375555000  | -2.146919000 | 0.258567000  |
| 6 | 0.116831000  | -2.594778000 | 1.603240000  |
| 1 | -0.128055000 | -3.661506000 | 1.585299000  |
| 1 | 1.035152000  | -2.438598000 | 2.169901000  |
| 1 | -0.705193000 | -2.031414000 | 2.054826000  |
| 6 | 4.182140000  | -0.275071000 | 0.456295000  |
| 1 | 3.977950000  | 0.096632000  | 1.469339000  |
| 6 | 3.249845000  | -1.422860000 | 0.151839000  |
| 6 | 2.814059000  | -1.731818000 | -1.118678000 |
| 1 | 3.194412000  | -1.215781000 | -1.995336000 |
| 6 | 2.434303000  | 1.059551000  | -0.730565000 |
| 6 | 3.951353000  | 0.835171000  | -0.571808000 |
| 1 | 4.404395000  | 0.554274000  | -1.529371000 |
| 1 | 4.454764000  | 1.757219000  | -0.259270000 |
| 1 | 3.078944000  | -2.152734000 | 0.943389000  |
| 1 | 2.328839000  | -2.685749000 | -1.304958000 |
| 1 | 5.221752000  | -0.632852000 | 0.466771000  |
| 1 | 2.120940000  | 1.891685000  | -0.086451000 |
| 1 | 2.177172000  | 1.346690000  | -1.759480000 |

**24**  
E + ZPE = -2666.176850

|    |              |              |              |
|----|--------------|--------------|--------------|
| 28 | 1.485035000  | -0.360712000 | 0.035480000  |
| 15 | -0.483843000 | 0.769997000  | 0.058709000  |
| 6  | -0.774739000 | 1.748404000  | 1.648946000  |
| 1  | -1.804102000 | 1.518391000  | 1.949472000  |
| 6  | -0.706017000 | 3.225702000  | 1.198835000  |
| 1  | -1.198100000 | 3.868658000  | 1.937151000  |
| 1  | 0.344099000  | 3.544277000  | 1.149986000  |
| 6  | -1.346908000 | 3.343397000  | -0.189722000 |
| 1  | -1.178290000 | 4.331469000  | -0.632898000 |
| 1  | -2.434631000 | 3.211748000  | -0.120606000 |
| 6  | -0.730848000 | 2.245634000  | -1.084381000 |
| 1  | 0.291822000  | 2.556313000  | -1.324818000 |
| 6  | -1.467095000 | 1.973266000  | -2.398244000 |
| 1  | -2.496715000 | 1.643364000  | -2.232796000 |
| 1  | -0.960270000 | 1.209906000  | -2.999315000 |
| 1  | -1.501477000 | 2.891131000  | -2.995519000 |
| 6  | 0.164127000  | 1.404226000  | 2.808715000  |
| 1  | 1.211494000  | 1.594408000  | 2.548027000  |
| 1  | 0.071376000  | 0.356379000  | 3.115231000  |
| 1  | -0.077280000 | 2.022281000  | 3.680937000  |
| 6  | -1.945105000 | -0.337344000 | -0.138331000 |
| 6  | -3.243095000 | 0.173134000  | 0.029656000  |
| 1  | -3.387101000 | 1.215673000  | 0.294629000  |
| 6  | -4.368801000 | -0.631625000 | -0.145044000 |
| 1  | -5.360182000 | -0.207938000 | -0.016294000 |
| 6  | -4.213417000 | -1.975395000 | -0.479909000 |
| 1  | -5.081865000 | -2.613186000 | -0.612784000 |
| 6  | -2.931545000 | -2.503148000 | -0.628075000 |
| 1  | -2.810319000 | -3.555895000 | -0.870916000 |
| 6  | -1.794845000 | -1.702520000 | -0.470151000 |
| 6  | -0.439803000 | -2.343733000 | -0.658029000 |

|   |              |              |              |
|---|--------------|--------------|--------------|
| 1 | 0.076518000  | -1.972556000 | -1.549529000 |
| 1 | -0.543002000 | -3.428971000 | -0.764599000 |
| 8 | 0.478145000  | -2.084721000 | 0.431552000  |
| 6 | 0.048401000  | -2.626195000 | 1.696899000  |
| 1 | -0.086238000 | -3.707981000 | 1.597756000  |
| 1 | 0.839432000  | -2.420515000 | 2.417431000  |
| 1 | -0.886170000 | -2.161992000 | 2.024660000  |
| 6 | 3.129336000  | -1.099284000 | 0.981188000  |
| 1 | 2.789565000  | -1.850864000 | 1.688083000  |
| 6 | 3.262603000  | -1.423318000 | -0.352129000 |
| 6 | 4.056931000  | -0.579661000 | -1.321332000 |
| 1 | 5.108911000  | -0.898300000 | -1.311882000 |
| 6 | 2.382871000  | 1.138804000  | -0.729850000 |
| 6 | 3.881250000  | 0.891370000  | -0.941591000 |
| 1 | 4.278404000  | 1.548249000  | -1.725706000 |
| 1 | 4.451785000  | 1.124986000  | -0.035088000 |
| 1 | 2.970410000  | -2.424198000 | -0.668971000 |
| 1 | 3.691567000  | -0.752282000 | -2.341735000 |
| 1 | 3.653475000  | -0.253085000 | 1.416580000  |
| 1 | 2.199228000  | 2.077474000  | -0.191371000 |
| 1 | 1.899337000  | 1.230516000  | -1.716334000 |

**25**  
E + ZPE = -2666.171227

|    |              |              |              |
|----|--------------|--------------|--------------|
| 28 | 1.419559000  | -0.492322000 | -0.242460000 |
| 15 | -0.431795000 | 0.759498000  | -0.018418000 |
| 6  | -0.486632000 | 1.939520000  | 1.451897000  |
| 1  | -1.479519000 | 1.805735000  | 1.896075000  |
| 6  | -0.415923000 | 3.348997000  | 0.816574000  |
| 1  | -0.820472000 | 4.095002000  | 1.509941000  |
| 1  | 0.632986000  | 3.619993000  | 0.638956000  |
| 6  | -1.180367000 | 3.327470000  | -0.514262000 |
| 1  | -1.015110000 | 4.243902000  | -1.092127000 |
| 1  | -2.260793000 | 3.262213000  | -0.330801000 |
| 6  | -0.710636000 | 2.094735000  | -1.319236000 |
| 1  | 0.294575000  | 2.302700000  | -1.703899000 |
| 6  | -1.606462000 | 1.701740000  | -2.495925000 |
| 1  | -2.623000000 | 1.457618000  | -2.173016000 |
| 1  | -1.206737000 | 0.839700000  | -3.041911000 |
| 1  | -1.670190000 | 2.536263000  | -3.202856000 |
| 6  | 0.559483000  | 1.679853000  | 2.541165000  |
| 1  | 1.580640000  | 1.766770000  | 2.155468000  |
| 1  | 0.444775000  | 0.685647000  | 2.987577000  |
| 1  | 0.446611000  | 2.413745000  | 3.347152000  |
| 6  | -1.982554000 | -0.238063000 | 0.070570000  |
| 6  | -3.193520000 | 0.370148000  | 0.442604000  |
| 1  | -3.219959000 | 1.425799000  | 0.692341000  |
| 6  | -4.386628000 | -0.350648000 | 0.490254000  |
| 1  | -5.307339000 | 0.149216000  | 0.775502000  |
| 6  | -4.388234000 | -1.707671000 | 0.175048000  |
| 1  | -5.308934000 | -2.281459000 | 0.216191000  |
| 6  | -3.193759000 | -2.329928000 | -0.184692000 |
| 1  | -3.193048000 | -3.391138000 | -0.420694000 |
| 6  | -1.993057000 | -1.614200000 | -0.252721000 |
| 6  | -0.751923000 | -2.359655000 | -0.687513000 |
| 1  | -0.394129000 | -2.034093000 | -1.669503000 |
| 1  | -0.957274000 | -3.433928000 | -0.746870000 |
| 8  | 0.385322000  | -2.170930000 | 0.188848000  |
| 6  | 0.178874000  | -2.639557000 | 1.536271000  |
| 1  | -0.110739000 | -3.694703000 | 1.509494000  |
| 1  | 1.131461000  | -2.534005000 | 2.056036000  |
| 1  | -0.593763000 | -2.053512000 | 2.042468000  |

|   |             |              |              |
|---|-------------|--------------|--------------|
| 6 | 4.270311000 | -0.486208000 | 0.411165000  |
| 1 | 4.419672000 | -0.560823000 | 1.492850000  |
| 6 | 3.235423000 | -1.504127000 | -0.011058000 |
| 6 | 2.768713000 | -1.632113000 | -1.299649000 |
| 1 | 3.182533000 | -1.037696000 | -2.109381000 |
| 6 | 2.461562000 | 1.052799000  | -0.326002000 |
| 6 | 3.852322000 | 0.962441000  | 0.031384000  |
| 1 | 4.604157000 | 1.420770000  | -0.622044000 |
| 1 | 3.850436000 | 1.564510000  | 0.945737000  |
| 1 | 3.025021000 | -2.314891000 | 0.685986000  |
| 1 | 2.220420000 | -2.522064000 | -1.598454000 |
| 1 | 5.233137000 | -0.753535000 | -0.043164000 |
| 1 | 1.988856000 | 1.990609000  | -0.326407000 |
| 1 | 2.530484000 | 1.098445000  | -1.729499000 |

**26**  
E + ZPE = -2666.170280

|    |              |              |              |
|----|--------------|--------------|--------------|
| 28 | 1.462549000  | -0.492245000 | 0.239207000  |
| 15 | -0.398746000 | 0.762104000  | 0.104104000  |
| 6  | -0.699100000 | 1.967792000  | 1.523441000  |
| 1  | -1.752289000 | 1.841090000  | 1.797384000  |
| 6  | -0.520796000 | 3.366439000  | 0.885483000  |
| 1  | -1.040140000 | 4.122646000  | 1.484864000  |
| 1  | 0.542820000  | 3.637776000  | 0.887289000  |
| 6  | -1.044823000 | 3.320527000  | -0.556791000 |
| 1  | -0.781119000 | 4.226994000  | -1.113676000 |
| 1  | -2.141105000 | 3.257099000  | -0.562556000 |
| 6  | -0.446939000 | 2.074620000  | -1.249336000 |
| 1  | 0.608960000  | 2.277889000  | -1.463762000 |
| 6  | -1.133724000 | 1.665388000  | -2.554285000 |
| 1  | -2.191876000 | 1.432503000  | -2.403088000 |
| 1  | -0.655454000 | 0.792317000  | -3.012382000 |
| 1  | -1.071533000 | 2.488363000  | -3.274820000 |
| 6  | 0.148971000  | 1.728137000  | 2.776644000  |
| 1  | 1.218824000  | 1.823150000  | 2.567771000  |
| 1  | -0.031462000 | 0.737032000  | 3.207966000  |
| 1  | -0.106156000 | 2.468514000  | 3.543255000  |
| 6  | -1.945951000 | -0.233097000 | -0.067819000 |
| 6  | -3.202975000 | 0.362750000  | 0.128990000  |
| 1  | -3.274804000 | 1.409535000  | 0.404906000  |
| 6  | -4.385341000 | -0.359802000 | -0.033344000 |
| 1  | -5.341737000 | 0.130961000  | 0.119572000  |
| 6  | -4.331336000 | -1.706028000 | -0.387142000 |
| 1  | -5.244376000 | -2.280678000 | -0.508632000 |
| 6  | -3.092184000 | -2.316502000 | -0.575109000 |
| 1  | -3.049320000 | -3.369582000 | -0.841532000 |
| 6  | -1.899677000 | -1.598580000 | -0.432115000 |
| 6  | -0.601143000 | -2.327365000 | -0.688297000 |
| 1  | -0.085773000 | -1.957279000 | -1.580036000 |
| 1  | -0.787099000 | -3.397603000 | -0.828621000 |
| 8  | 0.371570000  | -2.179905000 | 0.373881000  |
| 6  | -0.056390000 | -2.707510000 | 1.646038000  |
| 1  | -0.329411000 | -3.760541000 | 1.525690000  |
| 1  | 0.793659000  | -2.623449000 | 2.323423000  |
| 1  | -0.907516000 | -2.143634000 | 2.038709000  |
| 6  | 3.153870000  | -1.602465000 | 0.704390000  |
| 1  | 2.811929000  | -2.497841000 | 1.216247000  |
| 6  | 3.034558000  | -1.507635000 | -0.664299000 |
| 6  | 3.760805000  | -0.496928000 | -1.522936000 |
| 1  | 4.821098000  | -0.778019000 | -1.576297000 |
| 6  | 2.573956000  | 1.053588000  | 0.163230000  |
| 6  | 3.579949000  | 0.955003000  | -1.002494000 |

|   |             |              |              |
|---|-------------|--------------|--------------|
| 1 | 3.232554000 | 1.573552000  | -1.836615000 |
| 1 | 4.542878000 | 1.382403000  | -0.698380000 |
| 1 | 2.562685000 | -2.341204000 | -1.185322000 |
| 1 | 3.381728000 | -0.574868000 | -2.547351000 |
| 1 | 3.855062000 | -0.982598000 | 1.254733000  |
| 1 | 3.083838000 | 1.059362000  | 1.137034000  |
| 1 | 2.042034000 | 2.006646000  | 0.108326000  |

**27**  
E + ZPE = -2666.153030

|    |              |              |              |
|----|--------------|--------------|--------------|
| 28 | -1.348720000 | -0.191081000 | -0.263680000 |
| 15 | 0.505365000  | 0.792092000  | -0.008932000 |
| 6  | 0.993612000  | 2.060284000  | -1.311727000 |
| 1  | 2.055240000  | 1.877065000  | -1.514177000 |
| 6  | 0.867316000  | 3.412903000  | -0.575352000 |
| 1  | 1.430208000  | 4.188605000  | -1.106534000 |
| 1  | -0.183227000 | 3.733136000  | -0.566025000 |
| 6  | 1.367008000  | 3.222076000  | 0.864470000  |
| 1  | 1.160384000  | 4.099446000  | 1.487637000  |
| 1  | 2.456215000  | 3.080714000  | 0.870341000  |
| 6  | 0.669978000  | 1.972604000  | 1.447081000  |
| 1  | -0.368696000 | 2.241776000  | 1.674543000  |
| 6  | 1.307428000  | 1.386623000  | 2.708121000  |
| 1  | 2.341049000  | 1.071830000  | 2.535137000  |
| 1  | 0.748021000  | 0.520618000  | 3.079747000  |
| 1  | 1.314981000  | 2.139633000  | 3.503835000  |
| 6  | 0.239813000  | 1.974264000  | -2.641322000 |
| 1  | -0.835089000 | 2.139016000  | -2.514097000 |
| 1  | 0.381070000  | 1.001117000  | -3.124938000 |
| 1  | 0.612896000  | 2.739575000  | -3.331325000 |
| 6  | 1.899191000  | -0.418864000 | 0.058073000  |
| 6  | 3.226630000  | 0.036002000  | -0.012255000 |
| 1  | 3.433837000  | 1.098044000  | -0.095319000 |
| 6  | 4.305666000  | -0.846590000 | 0.032658000  |
| 1  | 5.319786000  | -0.461727000 | -0.016289000 |
| 6  | 4.073613000  | -2.216218000 | 0.134055000  |
| 1  | 4.903703000  | -2.915495000 | 0.158656000  |
| 6  | 2.763004000  | -2.686796000 | 0.196937000  |
| 1  | 2.583096000  | -3.756240000 | 0.272796000  |
| 6  | 1.671378000  | -1.810452000 | 0.174531000  |
| 6  | 0.293891000  | -2.416341000 | 0.333483000  |
| 1  | -0.163313000 | -2.145100000 | 1.288100000  |
| 1  | 0.353340000  | -3.508548000 | 0.285624000  |
| 8  | -0.675380000 | -1.984062000 | -0.656248000 |
| 6  | -0.376213000 | -2.406778000 | -2.004113000 |
| 1  | -0.252299000 | -3.493803000 | -2.017613000 |
| 1  | -1.233031000 | -2.127406000 | -2.618074000 |
| 1  | 0.531476000  | -1.920703000 | -2.373620000 |
| 6  | -4.374330000 | -0.327954000 | 0.338724000  |
| 1  | -5.231883000 | -0.796132000 | -0.157023000 |
| 6  | -3.507541000 | -1.385172000 | 0.975743000  |
| 6  | -2.851409000 | -1.248409000 | 2.137000000  |
| 1  | -2.947806000 | -0.354212000 | 2.748644000  |
| 6  | -2.425353000 | 1.301652000  | -0.059407000 |
| 6  | -3.533517000 | 0.457811000  | -0.685806000 |
| 1  | -4.155426000 | 1.045784000  | -1.372304000 |
| 1  | -3.066817000 | -0.301731000 | -1.376732000 |
| 1  | -3.413856000 | -2.323674000 | 0.427833000  |
| 1  | -2.245002000 | -2.051903000 | 2.547000000  |
| 1  | -4.767732000 | 0.362192000  | 1.093043000  |
| 1  | -2.193519000 | 2.188071000  | -0.655670000 |
| 1  | -2.641869000 | 1.607587000  | 0.968465000  |

**28**  
E + ZPE = -2666.157551

|    |              |              |              |
|----|--------------|--------------|--------------|
| 28 | -1.235448000 | -0.209149000 | -0.584193000 |
| 15 | 0.568328000  | 0.791698000  | -0.052393000 |
| 6  | 1.166016000  | 2.088278000  | -1.276880000 |
| 1  | 2.245174000  | 1.927576000  | -1.382639000 |
| 6  | 0.940254000  | 3.423541000  | -0.531229000 |
| 1  | 1.542536000  | 4.217983000  | -0.985737000 |
| 1  | -0.111349000 | 3.725382000  | -0.628356000 |
| 6  | 1.284746000  | 3.211103000  | 0.949649000  |
| 1  | 1.005517000  | 4.076036000  | 1.561841000  |
| 1  | 2.367861000  | 3.074419000  | 1.070972000  |
| 6  | 0.538287000  | 1.947809000  | 1.431745000  |
| 1  | -0.522696000 | 2.202766000  | 1.539039000  |
| 6  | 1.031595000  | 1.351934000  | 2.751264000  |
| 1  | 2.082715000  | 1.052441000  | 2.696948000  |
| 1  | 0.443301000  | 0.475976000  | 3.046770000  |
| 1  | 0.936349000  | 2.095754000  | 3.549949000  |
| 6  | 0.529762000  | 2.016520000  | -2.667611000 |
| 1  | -0.557979000 | 2.132249000  | -2.619596000 |
| 1  | 0.751173000  | 1.067697000  | -3.168971000 |
| 1  | 0.923301000  | 2.820200000  | -3.300130000 |
| 6  | 1.950900000  | -0.407908000 | 0.172839000  |
| 6  | 3.281064000  | 0.039336000  | 0.219576000  |
| 1  | 3.503213000  | 1.097730000  | 1.128144000  |
| 6  | 4.342978000  | -0.848525000 | 0.394484000  |
| 1  | 5.360424000  | -0.471464000 | 0.433945000  |
| 6  | 4.090678000  | -2.213219000 | 0.513047000  |
| 1  | 4.908812000  | -2.915405000 | 0.640433000  |
| 6  | 2.776338000  | -2.675829000 | 0.461030000  |
| 1  | 2.581407000  | -3.741458000 | 0.551538000  |
| 6  | 1.700165000  | -1.794840000 | 0.304353000  |
| 6  | 0.305914000  | -2.380886000 | 0.331869000  |
| 1  | -0.266948000 | -2.044180000 | 1.200518000  |
| 1  | 0.353905000  | -3.474010000 | 0.366194000  |
| 8  | -0.522987000 | -2.013116000 | -0.803415000 |
| 6  | -0.075026000 | -2.542494000 | -2.069962000 |
| 1  | 0.010383000  | -3.630439000 | -1.990831000 |
| 1  | -0.839517000 | -2.285665000 | -2.803995000 |
| 1  | 0.887777000  | -2.108893000 | -2.355324000 |
| 6  | -4.427546000 | -0.412628000 | 0.092800000  |
| 1  | -5.094435000 | -1.085066000 | -0.462626000 |
| 6  | -3.850795000 | -1.143236000 | 1.275805000  |
| 6  | -3.897172000 | -0.719445000 | 2.541265000  |
| 1  | -4.382848000 | 0.215106000  | 2.814261000  |
| 6  | -2.424348000 | 1.184897000  | -0.336138000 |
| 6  | -3.350021000 | 0.124836000  | -0.873538000 |
| 1  | -3.777344000 | 0.415040000  | -1.838571000 |
| 1  | -2.734411000 | -0.803807000 | -1.186286000 |
| 1  | -3.383864000 | -2.106408000 | 1.056304000  |
| 1  | -3.480394000 | -1.304706000 | 3.356248000  |
| 1  | -5.034101000 | 0.435860000  | 0.427819000  |
| 1  | -2.349163000 | 2.076084000  | -0.962221000 |
| 1  | -2.599999000 | 1.453375000  | 0.708766000  |

**29**  
E + ZPE = -2666.147229

|    |              |              |              |
|----|--------------|--------------|--------------|
| 28 | 1.001761000  | -0.337083000 | -0.088078000 |
| 15 | -0.782404000 | 0.754937000  | 0.008821000  |

|   |              |              |              |
|---|--------------|--------------|--------------|
| 6 | -0.989529000 | 1.877716000  | 1.498852000  |
| 1 | -2.018194000 | 1.728043000  | 1.846775000  |
| 6 | -0.877980000 | 3.296977000  | 0.897658000  |
| 1 | -1.299554000 | 4.035655000  | 1.588311000  |
| 1 | 0.180273000  | 3.556777000  | 0.759545000  |
| 6 | -1.597344000 | 3.299150000  | -0.459814000 |
| 1 | -1.431001000 | 4.232658000  | -1.008814000 |
| 1 | -2.681896000 | 3.207278000  | -0.312302000 |
| 6 | -1.074525000 | 2.095773000  | -1.276418000 |
| 1 | -0.065650000 | 2.340038000  | -1.629378000 |
| 6 | -1.928017000 | 1.687605000  | -2.478078000 |
| 1 | -2.942742000 | 1.404527000  | -2.181714000 |
| 1 | -1.486073000 | 0.845211000  | -3.022172000 |
| 1 | -2.004648000 | 2.526629000  | -3.178146000 |
| 6 | -0.042647000 | 1.595529000  | 2.668340000  |
| 1 | 1.006683000  | 1.694358000  | 2.371536000  |
| 1 | -0.191272000 | 0.589378000  | 3.076231000  |
| 1 | -0.228770000 | 2.308445000  | 3.479394000  |
| 6 | -2.223936000 | -0.398624000 | 0.002785000  |
| 6 | -3.497362000 | 0.068615000  | 0.366066000  |
| 1 | -3.638315000 | 1.108865000  | 0.641646000  |
| 6 | -4.609624000 | -0.773708000 | 0.373932000  |
| 1 | -5.581922000 | -0.380137000 | 0.654346000  |
| 6 | -4.463058000 | -2.114563000 | 0.027955000  |
| 1 | -5.318098000 | -2.783383000 | 0.040036000  |
| 6 | -3.205000000 | -2.597168000 | -0.331050000 |
| 1 | -3.092462000 | -3.644097000 | -0.601183000 |
| 6 | -2.084020000 | -1.759672000 | -0.362101000 |
| 6 | -0.780290000 | -2.359563000 | -0.841653000 |
| 1 | -0.448648000 | -1.919656000 | -1.786384000 |
| 1 | -0.890629000 | -3.437556000 | -0.995314000 |
| 8 | 0.341015000  | -2.154733000 | 0.061488000  |
| 6 | 0.227939000  | -2.854163000 | 1.321612000  |
| 1 | 0.103996000  | -3.923104000 | 1.125031000  |
| 1 | 1.162107000  | -2.684822000 | 1.857781000  |
| 1 | -0.619551000 | -2.474302000 | 1.899344000  |
| 6 | 6.659675000  | -0.797818000 | 0.410976000  |
| 1 | 7.367281000  | -1.621835000 | 0.398990000  |
| 6 | 5.714673000  | -0.671985000 | -0.521452000 |
| 6 | 4.708439000  | 0.443386000  | -0.570526000 |
| 1 | 4.935594000  | 1.197990000  | 0.190592000  |
| 6 | 2.182386000  | 1.034806000  | -0.415431000 |
| 6 | 3.249289000  | -0.060210000 | -0.344924000 |
| 1 | 3.246614000  | -0.556069000 | 0.642721000  |
| 1 | 3.063409000  | -0.839158000 | -1.108042000 |
| 1 | 2.329678000  | 1.808549000  | 0.344795000  |
| 1 | 2.133117000  | 1.503318000  | -1.404822000 |
| 1 | 5.642536000  | -1.417390000 | -1.315012000 |
| 1 | 4.738471000  | 0.945678000  | -1.546221000 |
| 1 | 6.773878000  | -0.072261000 | 1.214022000  |

.....  
**30**  
E + ZPE = -2666.156756

|    |              |              |              |
|----|--------------|--------------|--------------|
| 28 | 1.062310000  | -0.622940000 | -0.548581000 |
| 15 | -0.511283000 | 0.743534000  | -0.097792000 |
| 6  | -0.254052000 | 1.805288000  | 1.432205000  |
| 1  | -1.212311000 | 1.797677000  | 1.965024000  |
| 6  | -0.022983000 | 3.220988000  | 0.857372000  |
| 1  | -0.183990000 | 3.976353000  | 1.634562000  |
| 1  | 1.020940000  | 3.318244000  | 0.529327000  |
| 6  | -0.965738000 | 3.411741000  | -0.339643000 |
| 1  | -0.749167000 | 4.335673000  | -0.887568000 |

|   |              |              |              |
|---|--------------|--------------|--------------|
| 1 | -2.005485000 | 3.486272000  | 0.006395000  |
| 6 | -0.802946000 | 2.187689000  | -1.267875000 |
| 1 | 0.154979000  | 2.292809000  | -1.790551000 |
| 6 | -1.906613000 | 1.996531000  | -2.309653000 |
| 1 | -2.887539000 | 1.856358000  | -1.845631000 |
| 1 | -1.711545000 | 1.133659000  | -2.956364000 |
| 1 | -1.963319000 | 2.882083000  | -2.952064000 |
| 6 | 0.837030000  | 1.318876000  | 2.390030000  |
| 1 | 1.814606000  | 1.260071000  | 1.900141000  |
| 1 | 0.602593000  | 0.331151000  | 2.802982000  |
| 1 | 0.925935000  | 2.011929000  | 3.234464000  |
| 6 | -2.107315000 | -0.148013000 | 0.146989000  |
| 6 | -3.214513000 | 0.528057000  | 0.685416000  |
| 1 | -3.136192000 | 1.578974000  | 0.946322000  |
| 6 | -4.434295000 | -0.117004000 | 0.889441000  |
| 1 | -5.274472000 | 0.434682000  | 1.300137000  |
| 6 | -4.563621000 | -1.466785000 | 0.570253000  |
| 1 | -5.504429000 | -1.983407000 | 0.733324000  |
| 6 | -3.471504000 | -2.156401000 | 0.045388000  |
| 1 | -3.573391000 | -3.210811000 | -0.198733000 |
| 6 | -2.247190000 | -1.517030000 | -0.183013000 |
| 6 | -1.143927000 | -2.332097000 | -0.820624000 |
| 1 | -0.902972000 | -1.984333000 | -1.829651000 |
| 1 | -1.441996000 | -3.382865000 | -0.893331000 |
| 8 | 0.126277000  | -2.284106000 | -0.116431000 |
| 6 | 0.104546000  | -2.870423000 | 1.202131000  |
| 1 | -0.247510000 | -3.903679000 | 1.127319000  |
| 1 | 1.132165000  | -2.856095000 | 1.566436000  |
| 1 | -0.544557000 | -2.298129000 | 1.871093000  |
| 6 | 4.843980000  | 0.374664000  | 1.536206000  |
| 1 | 4.762336000  | 0.438306000  | 2.617622000  |
| 6 | 4.313799000  | -0.640095000 | 0.850118000  |
| 6 | 4.411540000  | -0.823076000 | -0.639576000 |
| 1 | 5.068953000  | -0.059987000 | -1.070703000 |
| 6 | 2.297138000  | 0.556442000  | -1.257600000 |
| 6 | 3.053473000  | -0.739985000 | -1.372042000 |
| 1 | 2.425310000  | -1.598547000 | -0.916314000 |
| 1 | 3.145303000  | -1.071350000 | -2.411126000 |
| 1 | 2.753103000  | 1.289244000  | -0.587154000 |
| 1 | 2.029457000  | 1.010332000  | -2.213878000 |
| 1 | 3.783413000  | -1.425887000 | 1.393959000  |
| 1 | 4.866939000  | -1.798077000 | -0.859847000 |
| 1 | 5.406335000  | 1.165281000  | 1.043872000  |

.....  
**31**  
E + ZPE = -2666.151430

|    |              |              |              |
|----|--------------|--------------|--------------|
| 28 | 1.286457000  | -0.263936000 | -0.355920000 |
| 15 | -0.520584000 | 0.788270000  | -0.004266000 |
| 6  | -0.621489000 | 1.912646000  | 1.504885000  |
| 1  | -1.545748000 | 1.637357000  | 2.024502000  |
| 6  | -0.786139000 | 3.331577000  | 0.909771000  |
| 1  | -1.226423000 | 4.005776000  | 1.652762000  |
| 1  | 0.203634000  | 3.736943000  | 0.659298000  |
| 6  | -1.638215000 | 3.235535000  | -0.363276000 |
| 1  | -1.650820000 | 4.181675000  | -0.916323000 |
| 1  | -2.681603000 | 3.004280000  | -0.110993000 |
| 6  | -1.041289000 | 2.112058000  | -1.235998000 |
| 1  | -0.093839000 | 2.479360000  | -1.646462000 |
| 6  | -1.919324000 | 1.633843000  | -2.393202000 |
| 1  | -2.875297000 | 1.234001000  | -2.042274000 |
| 1  | -1.422585000 | 0.857631000  | -2.986732000 |
| 1  | -2.133616000 | 2.472070000  | -3.065225000 |

|   |              |              |              |
|---|--------------|--------------|--------------|
| 6 | 0.539739000  | 1.784119000  | 2.493288000  |
| 1 | 1.497506000  | 2.012127000  | 2.015082000  |
| 1 | 0.602034000  | 0.778270000  | 2.922326000  |
| 1 | 0.401778000  | 2.488877000  | 3.321117000  |
| 6 | -1.936272000 | -0.396546000 | 0.122175000  |
| 6 | -3.160262000 | 0.016461000  | 0.673399000  |
| 1 | -3.279967000 | 1.029544000  | 1.042420000  |
| 6 | -4.254561000 | -0.845881000 | 0.752458000  |
| 1 | -5.188247000 | -0.492829000 | 1.179795000  |
| 6 | -4.140821000 | -2.153059000 | 0.286640000  |
| 1 | -4.982211000 | -2.836202000 | 0.349692000  |
| 6 | -2.930851000 | -0.586530000 | -0.256303000 |
| 1 | -2.839556000 | -3.605797000 | -0.614763000 |
| 6 | -1.830538000 | -1.724449000 | -0.356196000 |
| 6 | -0.575637000 | -2.266039000 | -1.002321000 |
| 1 | -0.338635000 | -1.760187000 | -1.942296000 |
| 1 | -0.688517000 | -3.333770000 | -1.215719000 |
| 8 | 0.618389000  | -2.101647000 | -0.189103000 |
| 6 | 0.593242000  | -2.870148000 | 1.033809000  |
| 1 | 0.439768000  | -3.925083000 | 0.787261000  |
| 1 | 1.564735000  | -2.737309000 | 1.506351000  |
| 1 | -0.202706000 | -2.518103000 | 1.696149000  |
| 6 | 3.513613000  | -0.520015000 | 1.808918000  |
| 1 | 3.094657000  | -1.120811000 | 2.612208000  |
| 6 | 3.828863000  | -1.046053000 | 0.617784000  |
| 6 | 4.407085000  | -0.280473000 | -0.544230000 |
| 1 | 4.910831000  | 0.629137000  | -0.199059000 |
| 6 | 2.304404000  | 1.151333000  | -0.976041000 |
| 6 | 3.274006000  | 0.097706000  | -1.516348000 |
| 1 | 2.707764000  | -0.846101000 | -1.745544000 |
| 1 | 3.658133000  | 0.385999000  | -2.502951000 |
| 1 | 2.758093000  | 1.818601000  | -0.236833000 |
| 1 | 1.874036000  | 1.750071000  | -1.783683000 |
| 1 | 3.660797000  | -2.111007000 | 0.446899000  |
| 1 | 5.154007000  | -0.893993000 | -1.060388000 |
| 1 | 3.709516000  | 0.524151000  | 2.040665000  |

**32**  
E + ZPE = -2666.122971

|    |              |              |              |
|----|--------------|--------------|--------------|
| 28 | -1.362494000 | -0.033197000 | 0.211569000  |
| 15 | 0.830239000  | -0.737217000 | -0.002479000 |
| 6  | 1.395389000  | -1.869679000 | 1.392969000  |
| 1  | 2.381792000  | -1.501278000 | 1.695861000  |
| 6  | 1.577862000  | -3.244811000 | 0.709600000  |
| 1  | 2.221952000  | -3.888114000 | 1.319573000  |
| 1  | 0.606398000  | -3.752042000 | 0.634408000  |
| 6  | 2.157323000  | -3.013971000 | -0.692566000 |
| 1  | 2.164651000  | -3.933319000 | -1.289092000 |
| 1  | 3.199858000  | -2.676291000 | -0.619440000 |
| 6  | 1.307657000  | -1.925931000 | -1.387006000 |
| 1  | 0.356652000  | -2.383699000 | -1.691777000 |
| 6  | 1.947740000  | -1.287795000 | -2.622181000 |
| 1  | 2.897858000  | -0.801724000 | -2.381051000 |
| 1  | 1.292580000  | -0.540424000 | -3.084071000 |
| 1  | 2.146863000  | -2.058650000 | -3.374790000 |
| 6  | 0.497322000  | -1.887222000 | 2.634126000  |
| 1  | -0.511383000 | -2.243804000 | 2.403558000  |
| 1  | 0.413682000  | -0.895231000 | 3.092439000  |
| 1  | 0.920417000  | -2.559299000 | 3.389244000  |
| 6  | 2.018629000  | 0.671029000  | -0.035050000 |
| 6  | 3.381083000  | 0.486487000  | 0.248591000  |
| 1  | 3.761780000  | -0.502411000 | 0.482857000  |

|   |              |              |              |
|---|--------------|--------------|--------------|
| 6 | 4.279695000  | 1.553758000  | 0.225158000  |
| 1 | 5.329363000  | 1.379197000  | 0.441287000  |
| 6 | 3.825156000  | 2.836366000  | -0.073368000 |
| 1 | 4.514223000  | 3.675216000  | -0.086215000 |
| 6 | 2.474098000  | 3.038667000  | -0.353517000 |
| 1 | 2.119527000  | 4.039325000  | -0.587718000 |
| 6 | 1.566138000  | 1.974147000  | -0.349003000 |
| 6 | 0.132036000  | 2.259088000  | -0.724874000 |
| 1 | -0.169898000 | 1.737794000  | -1.637799000 |
| 1 | -0.017166000 | 3.330579000  | -0.891661000 |
| 8 | -0.837645000 | 1.837766000  | 0.268427000  |
| 6 | -0.847890000 | 2.618278000  | 1.483165000  |
| 1 | -0.897487000 | 3.679290000  | 1.221275000  |
| 1 | -1.745457000 | 2.327498000  | 2.028174000  |
| 1 | 0.046674000  | 2.418553000  | 2.080487000  |
| 6 | -2.893302000 | -0.964114000 | -0.700121000 |
| 6 | -2.106823000 | -1.855101000 | 0.048803000  |
| 1 | -1.402329000 | -2.513528000 | -0.450021000 |
| 1 | -2.604810000 | 0.443480000  | 0.751196000  |
| 1 | -2.604199000 | -0.794982000 | -1.743698000 |
| 1 | -2.512067000 | -2.247552000 | 0.980821000  |
| 6 | -4.362868000 | -0.701202000 | -0.437590000 |
| 1 | -4.896955000 | -1.460456000 | -1.034708000 |
| 1 | -4.603799000 | -0.900287000 | 0.612214000  |
| 6 | -4.844760000 | 0.665815000  | -0.842854000 |
| 1 | -4.667485000 | 0.947969000  | -1.881918000 |
| 6 | -5.476209000 | 1.514806000  | -0.031177000 |
| 1 | -5.691882000 | 1.263598000  | 1.005421000  |
| 1 | -5.821576000 | 2.484546000  | -0.377637000 |

**33**  
E + ZPE = -2666.125436

|    |              |              |              |
|----|--------------|--------------|--------------|
| 28 | -1.451332000 | -0.046615000 | 0.664095000  |
| 15 | 0.658147000  | -0.748182000 | -0.029480000 |
| 6  | 1.460602000  | -1.876314000 | 1.256572000  |
| 1  | 2.491149000  | -1.515931000 | 1.355588000  |
| 6  | 1.495896000  | -3.262905000 | 0.575800000  |
| 1  | 2.232159000  | -3.908452000 | 1.067832000  |
| 1  | 0.521561000  | -3.759545000 | 0.686701000  |
| 6  | 1.811646000  | -3.059221000 | -0.912084000 |
| 1  | 1.692604000  | -3.985592000 | -1.485522000 |
| 1  | 2.855978000  | -2.743872000 | -1.036649000 |
| 6  | 0.866213000  | -1.964224000 | -1.453098000 |
| 1  | -0.131767000 | -2.415100000 | -1.557065000 |
| 6  | 1.262091000  | -1.357221000 | -2.801160000 |
| 1  | 2.242349000  | -0.873656000 | -2.754722000 |
| 1  | 0.535966000  | -0.610847000 | -3.142612000 |
| 1  | 1.310483000  | -2.143181000 | -3.562793000 |
| 6  | 0.815251000  | -1.859463000 | 2.646598000  |
| 1  | -0.223412000 | -2.206445000 | 2.625822000  |
| 1  | 0.831650000  | -0.857891000 | 3.091579000  |
| 1  | 1.367685000  | -2.522108000 | 3.322357000  |
| 6  | 1.845397000  | 0.644333000  | -0.234117000 |
| 6  | 3.221941000  | 0.399826000  | -0.369536000 |
| 1  | 3.595230000  | -0.619566000 | -0.374501000 |
| 6  | 4.136395000  | 1.444122000  | -0.505323000 |
| 1  | 5.193793000  | 1.224794000  | -0.618288000 |
| 6  | 3.687015000  | 2.763057000  | -0.489072000 |
| 1  | 4.390333000  | 3.584759000  | -0.583111000 |
| 6  | 2.325314000  | 3.024383000  | -0.342006000 |
| 1  | 1.976850000  | 4.053997000  | -0.324057000 |
| 6  | 1.395339000  | 1.984890000  | -0.225762000 |

|   |              |              |              |
|---|--------------|--------------|--------------|
| 6 | -0.067879000 | 2.348830000  | -0.138811000 |
| 1 | -0.630645000 | 2.025837000  | -1.019374000 |
| 1 | -0.190500000 | 3.433046000  | -0.051823000 |
| 8 | -0.767249000 | 1.744133000  | 0.979403000  |
| 6 | -0.498980000 | 2.324571000  | 2.272317000  |
| 1 | -0.627832000 | 3.409125000  | 2.207115000  |
| 1 | -1.233943000 | 1.905000000  | 2.958832000  |
| 1 | 0.516707000  | 2.084548000  | 2.601549000  |
| 6 | -2.686914000 | -1.111736000 | -0.513551000 |
| 6 | -2.371308000 | -1.825250000 | 0.638508000  |
| 1 | -1.622417000 | -2.612451000 | 0.595457000  |
| 1 | -2.629664000 | 0.378175000  | 1.403032000  |
| 1 | -2.098017000 | -1.310783000 | -1.411696000 |
| 1 | -3.092298000 | -1.913978000 | 1.446523000  |
| 6 | -4.010230000 | -0.437625000 | -0.787620000 |
| 1 | -4.614379000 | -1.176844000 | -1.341185000 |
| 1 | -4.537985000 | -0.227929000 | 0.147519000  |
| 6 | -3.881957000 | 0.812645000  | -1.623344000 |
| 1 | -3.448836000 | 0.679485000  | -2.616229000 |
| 6 | -4.279798000 | 2.026355000  | -1.237877000 |
| 1 | -4.737101000 | 2.196242000  | -0.265518000 |
| 1 | -4.188827000 | 2.889740000  | -1.891050000 |

**34**  
E + ZPE = -2666.153938

|    |              |              |              |
|----|--------------|--------------|--------------|
| 28 | 1.565848000  | -0.205228000 | 0.148636000  |
| 15 | -0.602877000 | 0.789915000  | -0.006018000 |
| 6  | -1.061659000 | 1.988778000  | 1.377356000  |
| 1  | -2.140697000 | 1.874711000  | 1.531712000  |
| 6  | -0.816566000 | 3.373246000  | 0.743764000  |
| 1  | -1.290747000 | 4.157349000  | 1.345095000  |
| 1  | 0.259924000  | 3.593825000  | 0.724277000  |
| 6  | -1.371562000 | 3.328154000  | -0.686172000 |
| 1  | -1.119264000 | 4.230660000  | -1.254385000 |
| 1  | -2.467885000 | 3.268075000  | -0.656755000 |
| 6  | -0.801826000 | 2.073007000  | -1.385713000 |
| 1  | 0.232966000  | 2.292002000  | -1.681210000 |
| 6  | -1.572504000 | 1.614789000  | -2.625518000 |
| 1  | -2.608087000 | 1.353150000  | -2.387568000 |
| 1  | -1.106588000 | 0.743223000  | -3.098991000 |
| 1  | -1.592295000 | 2.421034000  | -3.367355000 |
| 6  | -0.370343000 | 1.749782000  | 2.722029000  |
| 1  | 0.716542000  | 1.865034000  | 2.654343000  |
| 1  | -0.586332000 | 0.750481000  | 3.117184000  |
| 1  | -0.727807000 | 2.474924000  | 3.461796000  |
| 6  | -1.992849000 | -0.423564000 | -0.073073000 |
| 6  | -3.321154000 | 0.004916000  | 0.087482000  |
| 1  | -3.539239000 | 1.061280000  | 0.210393000  |
| 6  | -4.386606000 | -0.894812000 | 0.085672000  |
| 1  | -5.402373000 | -0.530112000 | 0.204970000  |
| 6  | -4.137598000 | -2.256919000 | -0.064272000 |
| 1  | -4.955304000 | -2.971074000 | -0.055049000 |
| 6  | -2.826190000 | -2.700793000 | -0.228073000 |
| 1  | -2.636181000 | -3.763777000 | -0.354140000 |
| 6  | -1.747620000 | -1.807230000 | -0.251128000 |
| 6  | -0.385121000 | -2.391517000 | -0.570437000 |
| 1  | -0.024168000 | -2.046588000 | -1.542817000 |
| 1  | -0.453880000 | -3.483770000 | -0.614231000 |
| 8  | 0.686423000  | -2.062815000 | 0.348004000  |
| 6  | 0.512996000  | -2.600624000 | 1.671607000  |
| 1  | 0.347066000  | -3.680859000 | 1.606898000  |
| 1  | 1.440462000  | -2.409235000 | 2.213668000  |

|   |              |              |              |
|---|--------------|--------------|--------------|
| 1 | -0.332167000 | -2.127224000 | 2.182252000  |
| 6 | 2.811987000  | 1.225446000  | 0.532298000  |
| 1 | 2.444424000  | 1.832240000  | 1.358335000  |
| 6 | 3.432331000  | -0.015547000 | 0.812080000  |
| 6 | 4.432130000  | -0.653514000 | -0.135057000 |
| 1 | 5.435580000  | -0.231781000 | 0.012247000  |
| 6 | 2.406827000  | -0.743275000 | -1.484142000 |
| 6 | 3.898882000  | -0.442773000 | -1.553151000 |
| 1 | 4.391177000  | -1.100381000 | -2.280974000 |
| 1 | 4.079892000  | 0.583248000  | -1.889837000 |
| 1 | 3.483826000  | -0.329810000 | 1.857756000  |
| 1 | 4.505909000  | -1.726483000 | 0.080847000  |
| 1 | 3.097058000  | 1.808427000  | -0.340739000 |
| 1 | 1.810196000  | -0.250918000 | -2.263853000 |
| 1 | 2.224671000  | -1.822781000 | -1.482756000 |

**35**  
E + ZPE = -2666.161678

|    |              |              |              |
|----|--------------|--------------|--------------|
| 28 | -1.544990000 | -0.364365000 | 0.163292000  |
| 15 | 0.559916000  | 0.767593000  | 0.003796000  |
| 6  | 0.867759000  | 2.114783000  | -1.290404000 |
| 1  | 1.835279000  | 1.873901000  | -1.741139000 |
| 6  | 1.010977000  | 3.423346000  | -0.476222000 |
| 1  | 1.579215000  | 4.165913000  | -1.047692000 |
| 1  | 0.016213000  | 3.856676000  | -0.302090000 |
| 6  | 1.672898000  | 3.098691000  | 0.868477000  |
| 1  | 1.643994000  | 3.953667000  | 1.554006000  |
| 1  | 2.731442000  | 2.846293000  | 0.722788000  |
| 6  | 0.931235000  | 1.891638000  | 1.478487000  |
| 1  | -0.057467000 | 2.232196000  | 1.814256000  |
| 6  | 1.639360000  | 1.228066000  | 2.661753000  |
| 1  | 2.625314000  | 0.845672000  | 2.380854000  |
| 1  | 1.056330000  | 0.398121000  | 3.077446000  |
| 1  | 1.780330000  | 1.959760000  | 3.465005000  |
| 6  | -0.159787000 | 2.197169000  | -2.423535000 |
| 1  | -1.147507000 | 2.494551000  | -2.056831000 |
| 1  | -0.259437000 | 1.246917000  | -2.959615000 |
| 1  | 0.153621000  | 2.953131000  | -3.152290000 |
| 6  | 2.003855000  | -0.384209000 | -0.124617000 |
| 6  | 3.268124000  | 0.064451000  | -0.540362000 |
| 1  | 3.423054000  | 1.106445000  | -0.797168000 |
| 6  | 4.360551000  | -0.799791000 | -0.624545000 |
| 1  | 5.325253000  | -0.417512000 | -0.944348000 |
| 6  | 4.206686000  | -2.145364000 | -0.301182000 |
| 1  | 5.046812000  | -2.829349000 | -0.371472000 |
| 6  | 2.958933000  | -2.610862000 | 0.110949000  |
| 1  | 2.836585000  | -3.661287000 | 0.362917000  |
| 6  | 1.860088000  | -1.750576000 | 0.215369000  |
| 6  | 0.563821000  | -2.332449000 | 0.727359000  |
| 1  | 0.278202000  | -1.925471000 | 1.702324000  |
| 1  | 0.650788000  | -3.418741000 | 0.835190000  |
| 8  | -0.584458000 | -2.072079000 | -0.118907000 |
| 6  | -0.493991000 | -2.620770000 | -1.448290000 |
| 1  | -0.186992000 | -3.669110000 | -1.382529000 |
| 1  | -1.492960000 | -2.557240000 | -1.880477000 |
| 1  | 0.222008000  | -2.058324000 | -2.055017000 |
| 6  | -2.501497000 | 1.362514000  | 0.447270000  |
| 1  | -1.842126000 | 2.212543000  | 0.302039000  |
| 6  | -3.068293000 | 0.737550000  | -0.662846000 |
| 6  | -4.376647000 | -0.024299000 | -0.605903000 |
| 1  | -5.215130000 | 0.679033000  | -0.713332000 |
| 6  | -3.003474000 | -1.455242000 | 0.780103000  |

|   |              |              |              |
|---|--------------|--------------|--------------|
| 6 | -4.386362000 | -0.811590000 | 0.700965000  |
| 1 | -5.186079000 | -1.561969000 | 0.717422000  |
| 1 | -4.572491000 | -0.147565000 | 1.552708000  |
| 1 | -2.732199000 | 1.054149000  | -1.650857000 |
| 1 | -4.435014000 | -0.712372000 | -1.458135000 |
| 1 | -2.995455000 | 1.337168000  | 1.416411000  |
| 1 | -2.695170000 | -1.724123000 | 1.803548000  |
| 1 | -2.975179000 | -2.366438000 | 0.171250000  |

**36**

E + ZPE = -2666.132287

|    |              |              |              |
|----|--------------|--------------|--------------|
| 28 | -1.428347000 | -0.631709000 | -0.139451000 |
| 15 | 0.373074000  | 0.782308000  | -0.074669000 |
| 6  | 0.553141000  | 1.934992000  | -1.560316000 |
| 1  | 1.593651000  | 1.843490000  | -1.889689000 |
| 6  | 0.345540000  | 3.350637000  | -0.975787000 |
| 1  | 0.762159000  | 4.107268000  | -1.650147000 |
| 1  | -0.730375000 | 3.560236000  | -0.892825000 |
| 6  | 0.989840000  | 3.398396000  | 0.415635000  |
| 1  | 0.742184000  | 4.322967000  | 0.949871000  |
| 1  | 2.084069000  | 3.369184000  | 0.328178000  |
| 6  | 0.495182000  | 2.167622000  | 1.204270000  |
| 1  | -0.548943000 | 2.353541000  | 1.490305000  |
| 6  | 1.290277000  | 1.842216000  | 2.470852000  |
| 1  | 2.343364000  | 1.646554000  | 2.247770000  |
| 1  | 0.889085000  | 0.965936000  | 2.992785000  |
| 1  | 1.246121000  | 2.687675000  | 3.166353000  |
| 6  | -0.347973000 | 1.616540000  | -2.756511000 |
| 1  | -1.409841000 | 1.715563000  | -2.504343000 |
| 1  | -0.178917000 | 0.605180000  | -3.142924000 |
| 1  | -0.143063000 | 2.317449000  | -3.573713000 |
| 6  | 1.958995000  | -0.162187000 | 0.003000000  |
| 6  | 3.182766000  | 0.448685000  | -0.316277000 |
| 1  | 3.210298000  | 1.491353000  | -0.615316000 |
| 6  | 4.387835000  | -0.250999000 | -0.249475000 |
| 1  | 5.317761000  | 0.252178000  | -0.496728000 |
| 6  | 4.390159000  | -1.590919000 | 0.131215000  |
| 1  | 5.320311000  | -2.148848000 | 0.178364000  |
| 6  | 3.184534000  | -2.215496000 | 0.446833000  |
| 1  | 3.185493000  | -3.262242000 | 0.740610000  |
| 6  | 1.970499000  | -1.519745000 | 0.400879000  |
| 6  | 0.720964000  | -2.264111000 | 0.811332000  |
| 1  | 0.265432000  | -1.848967000 | 1.713661000  |
| 1  | 0.955294000  | -3.315551000 | 1.008131000  |
| 8  | -0.344591000 | -2.238970000 | -0.174353000 |
| 6  | -0.005074000 | -2.895577000 | -1.413602000 |
| 1  | 0.394620000  | -3.889592000 | -1.190385000 |
| 1  | -0.927424000 | -2.989936000 | -1.982897000 |
| 1  | 0.732344000  | -2.311776000 | -1.972092000 |
| 6  | -4.134198000 | 0.404380000  | 0.513401000  |
| 1  | -4.925631000 | -0.283522000 | 0.829180000  |
| 6  | -3.010244000 | 0.467977000  | 1.524477000  |
| 6  | -2.502856000 | -0.587485000 | 2.191757000  |
| 1  | -2.968007000 | -1.568427000 | 2.169352000  |
| 6  | -3.001461000 | -1.501045000 | -0.723995000 |
| 6  | -3.498800000 | -0.094183000 | -0.796638000 |
| 1  | -4.071395000 | 0.138310000  | -1.703407000 |
| 1  | -2.563929000 | 0.567331000  | -0.951541000 |
| 1  | -2.566306000 | 1.448342000  | 1.689455000  |
| 1  | -1.683338000 | -0.456941000 | 2.894005000  |
| 1  | -4.585643000 | 1.391818000  | 0.380592000  |
| 1  | -3.515531000 | -2.156627000 | -0.022024000 |

|   |              |              |              |
|---|--------------|--------------|--------------|
| 1 | -2.884265000 | -1.985139000 | -1.697401000 |
|---|--------------|--------------|--------------|

**37**

E + ZPE = -2666.145240

|    |              |              |              |
|----|--------------|--------------|--------------|
| 28 | -1.238181000 | -0.525060000 | -0.580338000 |
| 15 | 0.513649000  | 0.801562000  | -0.111245000 |
| 6  | 0.919132000  | 2.093403000  | -1.420412000 |
| 1  | 1.996305000  | 2.027370000  | -1.607410000 |
| 6  | 0.618008000  | 3.442431000  | -0.725441000 |
| 1  | 1.139944000  | 4.259183000  | -1.236209000 |
| 1  | -0.456989000 | 3.659789000  | -0.798000000 |
| 6  | 1.022756000  | 3.328608000  | 0.749932000  |
| 1  | 0.699083000  | 4.198791000  | 1.332385000  |
| 1  | 2.116171000  | 3.275365000  | 0.839722000  |
| 6  | 0.392168000  | 2.036356000  | 1.310092000  |
| 1  | -0.688061000 | 2.205990000  | 1.419913000  |
| 6  | 0.952500000  | 1.564588000  | 2.652920000  |
| 1  | 2.025763000  | 1.359693000  | 2.591502000  |
| 1  | 0.453606000  | 0.656180000  | 3.009294000  |
| 1  | 0.801860000  | 2.340433000  | 3.411610000  |
| 6  | 0.189266000  | 1.897533000  | -2.753554000 |
| 1  | -0.899261000 | 1.940003000  | -2.629623000 |
| 1  | 0.443355000  | 0.940534000  | -3.222625000 |
| 1  | 0.469529000  | 2.691025000  | -3.455518000 |
| 6  | 2.038725000  | -0.200562000 | 0.145049000  |
| 6  | 3.320523000  | 0.353075000  | 0.006180000  |
| 1  | 3.438311000  | 1.400484000  | -0.251895000 |
| 6  | 4.469139000  | -0.414097000 | 0.206697000  |
| 1  | 5.448097000  | 0.043262000  | 0.099480000  |
| 6  | 4.353167000  | -1.761261000 | 0.541128000  |
| 1  | 5.239979000  | -2.369084000 | 0.691991000  |
| 6  | 3.086605000  | -2.328819000 | 0.678714000  |
| 1  | 2.997309000  | -3.380883000 | 0.940802000  |
| 6  | 1.926875000  | -1.567402000 | 0.496917000  |
| 6  | 0.593641000  | -2.240824000 | 0.723337000  |
| 1  | 0.026519000  | -1.784361000 | 1.538641000  |
| 1  | 0.735958000  | -3.298460000 | 0.966255000  |
| 8  | -0.312155000 | -2.182597000 | -0.413590000 |
| 6  | 0.130353000  | -2.913812000 | -1.577237000 |
| 1  | 0.398327000  | -3.929889000 | -1.272840000 |
| 1  | -0.714474000 | -2.943780000 | -2.263754000 |
| 1  | 0.989013000  | -2.422341000 | -2.043814000 |
| 6  | -4.129385000 | 0.535150000  | 0.281488000  |
| 1  | -5.113658000 | 0.099654000  | 0.078436000  |
| 6  | -3.627023000 | 0.086614000  | 1.627118000  |
| 6  | -4.210897000 | -0.832089000 | 2.398990000  |
| 1  | -5.126599000 | -1.335489000 | 2.096433000  |
| 6  | -2.895966000 | -1.280890000 | -1.081547000 |
| 6  | -3.201714000 | 0.138515000  | -0.886124000 |
| 1  | -3.453642000 | 0.661239000  | -1.813723000 |
| 1  | -2.171314000 | 0.744492000  | -0.622490000 |
| 1  | -2.723206000 | 0.584326000  | 1.986450000  |
| 1  | -3.810146000 | -1.099249000 | 3.372696000  |
| 1  | -4.254472000 | 1.626366000  | 0.278531000  |
| 1  | -3.298358000 | -1.978945000 | -0.348167000 |
| 1  | -2.934605000 | -1.652566000 | -2.106685000 |

**38**

E + ZPE = -2666.137162

|    |             |              |              |
|----|-------------|--------------|--------------|
| 28 | 0.980422000 | -1.022272000 | -0.216646000 |
|----|-------------|--------------|--------------|

|    |              |              |              |
|----|--------------|--------------|--------------|
| 15 | -0.333393000 | 0.703100000  | -0.036729000 |
| 6  | 0.082896000  | 1.865728000  | 1.374983000  |
| 1  | -0.869940000 | 2.184136000  | 1.812307000  |
| 6  | 0.728073000  | 3.075122000  | 0.661149000  |
| 1  | 0.727997000  | 3.948330000  | 1.323133000  |
| 1  | 1.776344000  | 2.844070000  | 0.430817000  |
| 6  | -0.049364000 | 3.332963000  | -0.636536000 |
| 1  | 0.437628000  | 4.088889000  | -1.262807000 |
| 1  | -1.054777000 | 3.711119000  | -0.405930000 |
| 6  | -0.158123000 | 1.994260000  | -1.400352000 |
| 1  | 0.819878000  | 1.773201000  | -1.844026000 |
| 6  | -1.220178000 | 1.956140000  | -2.500157000 |
| 1  | -2.224542000 | 2.133544000  | -2.103412000 |
| 1  | -1.228916000 | 0.996202000  | -3.028671000 |
| 1  | -1.010442000 | 2.735053000  | -3.241586000 |
| 6  | 0.943024000  | 1.246083000  | 2.480029000  |
| 1  | 1.890502000  | 0.873346000  | 2.078124000  |
| 1  | 0.428440000  | 0.418232000  | 2.980990000  |
| 1  | 1.172161000  | 1.998824000  | 3.242733000  |
| 6  | -2.114621000 | 0.257872000  | 0.114781000  |
| 6  | -3.053396000 | 1.174427000  | 0.613619000  |
| 1  | -2.738506000 | 2.165622000  | 0.923461000  |
| 6  | -4.406360000 | 0.846862000  | 0.710503000  |
| 1  | -5.111764000 | 1.578109000  | 1.093468000  |
| 6  | -4.843430000 | -0.416095000 | 0.317268000  |
| 1  | -5.892565000 | -0.684078000 | 0.395636000  |
| 6  | -3.922312000 | -1.340554000 | -0.174724000 |
| 1  | -4.263816000 | -2.326853000 | -0.478744000 |
| 6  | -2.566023000 | -1.018774000 | -0.294043000 |
| 6  | -1.640925000 | -2.055813000 | -0.888557000 |
| 1  | -1.222480000 | -1.740568000 | -1.849024000 |
| 1  | -2.177366000 | -2.996706000 | -1.048880000 |
| 8  | -0.473407000 | -2.352253000 | -0.077612000 |
| 6  | -0.770058000 | -2.897547000 | 1.222981000  |
| 1  | -1.443774000 | -3.752164000 | 1.109279000  |
| 1  | 0.177520000  | -3.232763000 | 1.646759000  |
| 1  | -1.227763000 | -2.144041000 | 1.870545000  |
| 6  | 4.153257000  | -0.928415000 | -0.343532000 |
| 1  | 4.075931000  | -0.735923000 | -1.419217000 |
| 6  | 4.435134000  | 0.346245000  | 0.404517000  |
| 6  | 4.617945000  | 1.537300000  | -0.168394000 |
| 1  | 4.560387000  | 1.668729000  | -1.247127000 |
| 6  | 2.232408000  | -2.567541000 | -0.678309000 |
| 6  | 2.951062000  | -1.718955000 | 0.134860000  |
| 1  | 2.910385000  | -1.875179000 | 1.215795000  |
| 1  | 1.874359000  | 0.093551000  | -0.321405000 |
| 1  | 4.529508000  | 0.254205000  | 1.487767000  |
| 1  | 4.861696000  | 2.419896000  | 0.416235000  |
| 1  | 5.011369000  | -1.608805000 | -0.209622000 |
| 1  | 2.430911000  | -2.589054000 | -1.749712000 |
| 1  | 1.723915000  | -3.439638000 | -0.279493000 |

**39**  
E + ZPE = -2666.143530

|    |              |              |              |
|----|--------------|--------------|--------------|
| 28 | -1.100531000 | -0.131740000 | 0.557746000  |
| 15 | 0.815025000  | 0.808287000  | 0.058824000  |
| 6  | 0.730855000  | 2.005729000  | -1.382579000 |
| 1  | 1.650864000  | 1.865385000  | -1.961979000 |
| 6  | 0.785462000  | 3.389056000  | -0.696968000 |
| 1  | 1.055591000  | 4.160776000  | -1.426247000 |
| 1  | -0.209946000 | 3.646625000  | -0.311027000 |
| 6  | 1.789885000  | 3.308873000  | 0.459271000  |

|   |              |              |              |
|---|--------------|--------------|--------------|
| 1 | 1.777210000  | 4.213789000  | 1.077023000  |
| 1 | 2.810824000  | 3.206193000  | 0.066428000  |
| 6 | 1.432616000  | 2.072760000  | 1.315756000  |
| 1 | 0.538675000  | 2.309932000  | 1.904386000  |
| 6 | 2.535832000  | 1.596599000  | 2.262432000  |
| 1 | 3.442089000  | 1.307887000  | 1.720991000  |
| 1 | 2.216000000  | 0.741289000  | 2.868259000  |
| 1 | 2.801025000  | 2.404953000  | 2.952749000  |
| 6 | -0.469777000 | 1.801976000  | -2.310606000 |
| 1 | -1.412682000 | 1.892857000  | -1.760431000 |
| 1 | -0.446953000 | 0.820620000  | -2.797713000 |
| 1 | -0.466893000 | 2.561094000  | -3.100674000 |
| 6 | 2.148926000  | -0.414278000 | -0.266276000 |
| 6 | 3.326511000  | -0.047828000 | -0.935673000 |
| 1 | 3.464582000  | 0.972806000  | -1.278846000 |
| 6 | 4.345853000  | -0.972657000 | -1.165549000 |
| 1 | 5.250093000  | -0.662166000 | -1.680201000 |
| 6 | 4.196154000  | -2.288923000 | -0.734362000 |
| 1 | 4.980271000  | -3.018157000 | -0.913310000 |
| 6 | 3.027195000  | -2.670465000 | -0.075460000 |
| 1 | 2.911400000  | -3.699704000 | 0.254867000  |
| 6 | 2.002462000  | -1.751352000 | 0.174892000  |
| 6 | 0.785392000  | -2.234382000 | 0.934673000  |
| 1 | 0.672685000  | -1.737740000 | 1.903058000  |
| 1 | 0.859007000  | -3.311058000 | 1.118907000  |
| 8 | -0.479480000 | -1.989816000 | 0.261177000  |
| 6 | -0.603814000 | -2.660526000 | -1.010895000 |
| 1 | -0.462645000 | -3.735403000 | -0.862125000 |
| 1 | -1.613874000 | -2.470167000 | -1.372477000 |
| 1 | 0.130784000  | -2.282247000 | -1.727484000 |
| 6 | -3.997396000 | 0.400145000  | -0.091248000 |
| 1 | -3.927951000 | 1.320726000  | 0.502140000  |
| 6 | -5.427992000 | -0.089655000 | -0.138004000 |
| 6 | -6.119339000 | -0.297009000 | -1.258580000 |
| 1 | -5.691092000 | -0.112668000 | -2.241981000 |
| 6 | -2.625353000 | -0.635519000 | 1.808970000  |
| 6 | -3.109742000 | -0.661712000 | 0.519447000  |
| 1 | -3.124604000 | -1.621700000 | 0.002510000  |
| 1 | -1.449735000 | 1.246396000  | 0.773172000  |
| 1 | -5.890578000 | -0.283136000 | 0.829574000  |
| 1 | -7.147976000 | -0.644750000 | -1.235875000 |
| 1 | -3.666467000 | 0.641711000  | -1.109921000 |
| 1 | -2.850417000 | 0.197672000  | 2.470051000  |
| 1 | -2.296339000 | -1.553869000 | 2.292082000  |

**40R**  
E + ZPE = -2975.660383

|    |              |              |              |
|----|--------------|--------------|--------------|
| 28 | -0.963201000 | -0.952028000 | -0.007538000 |
| 15 | 0.847122000  | -0.163466000 | 0.998221000  |
| 6  | 0.525777000  | 1.378821000  | 2.016716000  |
| 1  | 0.614356000  | 2.250856000  | 1.363977000  |
| 6  | 1.598417000  | 1.391360000  | 3.153819000  |
| 1  | 2.238139000  | 2.275974000  | 3.074207000  |
| 1  | 1.078653000  | 1.473718000  | 4.114490000  |
| 6  | 2.448731000  | 0.102687000  | 3.127310000  |
| 1  | 2.755938000  | -0.192776000 | 4.136896000  |
| 1  | 3.369500000  | 0.261842000  | 2.554183000  |
| 6  | 1.643191000  | -1.033401000 | 2.466927000  |
| 1  | 0.796060000  | -1.288147000 | 3.117987000  |
| 6  | 2.479682000  | -2.289890000 | 2.224715000  |
| 1  | 3.307043000  | -2.095985000 | 1.533977000  |
| 1  | 1.889074000  | -3.124807000 | 1.834864000  |



|   |              |              |              |
|---|--------------|--------------|--------------|
| 1 | 2.917132000  | -2.622038000 | 3.172892000  |
| 6 | -0.902216000 | 1.371195000  | 2.593200000  |
| 1 | -1.084275000 | 0.490383000  | 3.220073000  |
| 1 | -1.663727000 | 1.408279000  | 1.809778000  |
| 1 | -1.037993000 | 2.253911000  | 3.227976000  |
| 6 | 2.269189000  | 0.191074000  | -0.132664000 |
| 6 | 2.922101000  | 1.432829000  | -0.071610000 |
| 1 | 2.587660000  | 2.194861000  | 0.623043000  |
| 6 | 4.018922000  | 1.719973000  | -0.886537000 |
| 1 | 4.503993000  | 2.688909000  | -0.814058000 |
| 6 | 4.492012000  | 0.757608000  | -1.773648000 |
| 1 | 5.352643000  | 0.963153000  | -2.402996000 |
| 6 | 3.855106000  | -0.481383000 | -1.842096000 |
| 1 | 4.235511000  | -1.239396000 | -2.522259000 |
| 6 | 2.741021000  | -0.783632000 | -1.048713000 |
| 6 | 2.075304000  | -2.135874000 | -1.238029000 |
| 1 | 1.659978000  | -2.512987000 | -0.302228000 |
| 1 | 2.817699000  | -2.867870000 | -1.586381000 |
| 8 | 0.969828000  | -2.104688000 | -2.143573000 |
| 6 | 1.340926000  | -2.091412000 | -3.519016000 |
| 1 | 1.971965000  | -2.957572000 | -3.763042000 |
| 1 | 0.415614000  | -2.153985000 | -4.096250000 |
| 1 | 1.872152000  | -1.171155000 | -3.794028000 |
| 6 | -3.694467000 | -2.201582000 | 0.891068000  |
| 1 | -3.714561000 | -1.311683000 | 1.531543000  |
| 6 | -4.680694000 | -2.056165000 | -0.237727000 |
| 6 | -5.504094000 | -1.018278000 | -0.397099000 |
| 1 | -5.515250000 | -0.184167000 | 0.302478000  |
| 6 | -1.186235000 | -2.313993000 | 1.373329000  |
| 6 | -2.257855000 | -2.501998000 | 0.460451000  |
| 1 | -2.157390000 | -3.348694000 | -0.222996000 |
| 1 | -2.160319000 | -1.513253000 | -0.733212000 |
| 1 | -4.723797000 | -2.886170000 | -0.944831000 |
| 1 | -6.219068000 | -0.976234000 | -1.213646000 |
| 1 | -3.995350000 | -3.049670000 | 1.526270000  |
| 1 | -1.417765000 | -1.898646000 | 2.352919000  |
| 1 | -0.369208000 | -3.031937000 | 1.371513000  |
| 6 | -0.864546000 | 0.506788000  | -1.426379000 |
| 6 | -1.776863000 | -0.503747000 | -1.826672000 |
| 1 | 0.134521000  | 0.430007000  | -1.845481000 |
| 1 | -1.421832000 | -1.245694000 | -2.537826000 |
| 1 | -2.827699000 | -0.242290000 | -1.930702000 |
| 6 | -1.293218000 | 1.884014000  | -1.092773000 |
| 6 | -2.594052000 | 2.197373000  | -0.655714000 |
| 1 | -3.334381000 | 1.410655000  | -0.531690000 |
| 6 | -0.373130000 | 2.935880000  | -1.248205000 |
| 1 | 0.630842000  | 2.715365000  | -1.601931000 |
| 6 | -0.739658000 | 4.255603000  | -0.985517000 |
| 6 | -2.958718000 | 3.515224000  | -0.389910000 |
| 6 | -2.033287000 | 4.549940000  | -0.551878000 |
| 1 | -3.969695000 | 3.737325000  | -0.060465000 |
| 1 | -0.017664000 | 5.054517000  | -1.128771000 |
| 1 | -2.322412000 | 5.577007000  | -0.350029000 |

**40S**

E + ZPE = -2975.661373

|    |              |              |              |
|----|--------------|--------------|--------------|
| 28 | -0.445622000 | 0.962562000  | -0.101844000 |
| 15 | 0.769117000  | -0.816768000 | 0.387782000  |
| 6  | 0.377059000  | -1.550241000 | 2.078740000  |
| 1  | 1.096822000  | -1.136823000 | 2.791497000  |
| 6  | 0.555982000  | -3.095586000 | 1.940725000  |
| 1  | 1.155517000  | -3.491318000 | 2.767112000  |

|   |              |              |              |
|---|--------------|--------------|--------------|
| 1 | -0.432592000 | -3.562215000 | 2.020758000  |
| 6 | 1.170118000  | -3.455527000 | 0.578121000  |
| 1 | 0.935185000  | -4.489120000 | 0.298066000  |
| 1 | 2.263859000  | -3.378121000 | 0.606421000  |
| 6 | 0.613464000  | -2.479075000 | -0.474977000 |
| 1 | -0.469293000 | -2.637757000 | -0.557945000 |
| 6 | 1.254688000  | -2.643299000 | -1.853173000 |
| 1 | 2.328207000  | -2.429021000 | -1.828966000 |
| 1 | 0.792745000  | -2.004700000 | -2.613453000 |
| 1 | 1.134955000  | -3.679501000 | -2.189272000 |
| 6 | -1.035007000 | -1.196462000 | 2.573587000  |
| 1 | -1.806523000 | -1.526074000 | 1.870245000  |
| 1 | -1.166654000 | -0.123181000 | 2.739877000  |
| 1 | -1.219154000 | -1.701948000 | 3.528581000  |
| 6 | 2.589682000  | -0.462829000 | 0.341500000  |
| 6 | 3.420116000  | -0.896875000 | 1.386337000  |
| 1 | 3.004221000  | -1.426550000 | 2.235731000  |
| 6 | 4.798823000  | -0.675074000 | 1.364892000  |
| 1 | 5.412059000  | -1.024763000 | 2.190037000  |
| 6 | 5.376512000  | -0.018438000 | 0.283420000  |
| 1 | 6.448145000  | 0.153088000  | 0.249476000  |
| 6 | 4.564576000  | 0.413520000  | -0.765538000 |
| 1 | 5.016532000  | 0.913497000  | -1.618700000 |
| 6 | 3.178854000  | 0.213316000  | -0.758361000 |
| 6 | 2.380307000  | 0.751735000  | -1.932957000 |
| 1 | 1.586044000  | 0.063816000  | -2.228641000 |
| 1 | 3.044166000  | 0.876406000  | -2.799824000 |
| 8 | 1.714259000  | 1.988521000  | -1.660954000 |
| 6 | 2.579528000  | 3.120794000  | -1.651993000 |
| 1 | 3.109586000  | 3.215356000  | -2.609902000 |
| 1 | 1.947809000  | 4.000650000  | -1.510247000 |
| 1 | 3.315714000  | 3.069251000  | -0.839541000 |
| 6 | -1.538702000 | 0.046740000  | -1.531736000 |
| 6 | -1.708275000 | 1.455519000  | -1.615617000 |
| 1 | -2.697381000 | 1.863673000  | -1.416552000 |
| 1 | -1.185133000 | 2.243305000  | -0.391134000 |
| 1 | -0.853032000 | -0.392294000 | -2.252826000 |
| 6 | 0.501905000  | 1.883219000  | 1.360281000  |
| 6 | -0.422270000 | 2.819573000  | 0.827039000  |
| 1 | 0.305932000  | 1.483504000  | 2.353093000  |
| 1 | 1.553288000  | 1.990492000  | 1.112385000  |
| 1 | 0.007231000  | 3.588521000  | 0.181191000  |
| 1 | -1.138721000 | 1.994221000  | -2.370875000 |
| 6 | -2.639877000 | -0.850275000 | -1.104461000 |
| 6 | -3.594584000 | -0.470474000 | -0.143164000 |
| 1 | -3.533596000 | 0.506985000  | 0.329354000  |
| 6 | -2.764572000 | -2.117785000 | -1.699077000 |
| 1 | -2.052933000 | -2.420927000 | -2.463581000 |
| 6 | -3.809018000 | -2.975017000 | -1.352769000 |
| 6 | -4.635726000 | -1.328173000 | 0.205891000  |
| 6 | -4.746153000 | -2.585066000 | -0.395221000 |
| 1 | -5.365033000 | -1.014559000 | 0.947339000  |
| 1 | -3.893515000 | -3.943604000 | -1.836923000 |
| 1 | -5.560281000 | -3.250375000 | -0.123852000 |
| 6 | -1.612493000 | 3.291372000  | 1.663557000  |
| 1 | -1.197876000 | 4.004832000  | 2.392469000  |
| 1 | -2.018755000 | 2.455844000  | 2.246054000  |
| 6 | -2.708859000 | 3.965158000  | 0.881009000  |
| 1 | -2.399923000 | 4.796341000  | 0.244781000  |
| 6 | -4.000748000 | 3.637885000  | 0.944491000  |
| 1 | -4.357859000 | 2.835995000  | 1.588225000  |
| 1 | -4.755163000 | 4.176873000  | 0.378797000  |

S15

E + ZPE = -2008.734676

|    |              |              |              |
|----|--------------|--------------|--------------|
| 28 | -0.234533000 | 0.013316000  | -0.000005000 |
| 15 | 1.921104000  | -0.180560000 | 0.000001000  |
| 1  | 2.603832000  | 0.401565000  | 1.085231000  |
| 1  | 2.603864000  | 0.401716000  | -1.085127000 |
| 1  | 2.512563000  | -1.458403000 | -0.000082000 |
| 6  | 0.028883000  | 1.964203000  | 0.000001000  |
| 6  | -1.363997000 | 1.702782000  | 0.000004000  |
| 1  | -1.726737000 | 0.178869000  | -0.000025000 |
| 1  | -1.924049000 | 1.888309000  | -0.915817000 |
| 1  | 0.489591000  | 2.325355000  | 0.917693000  |
| 1  | 0.489587000  | 2.325358000  | -0.917692000 |
| 6  | -0.407892000 | -1.939167000 | 0.000002000  |
| 6  | -1.711686000 | -1.387652000 | 0.000006000  |
| 1  | -0.024557000 | -2.383292000 | 0.917058000  |
| 1  | -2.298486000 | -1.444942000 | 0.916023000  |
| 1  | -2.298496000 | -1.444963000 | -0.916004000 |
| 1  | -0.024566000 | -2.383302000 | -0.917054000 |
| 1  | -1.924027000 | 1.888289000  | 0.915843000  |

S16

E + ZPE = -2239.718500

|    |              |              |              |
|----|--------------|--------------|--------------|
| 28 | -1.432410000 | -0.116450000 | 0.156164000  |
| 15 | -0.990832000 | 1.976830000  | -0.219081000 |
| 1  | -2.064360000 | 2.887755000  | -0.178169000 |
| 1  | -0.453702000 | 2.273271000  | -1.486546000 |
| 1  | -0.062971000 | 2.661219000  | 0.590866000  |
| 6  | -2.817979000 | -0.001645000 | -1.230984000 |
| 6  | -2.871415000 | -1.297050000 | -0.653397000 |
| 1  | -1.846939000 | -1.512005000 | 0.510771000  |
| 1  | -2.495314000 | -2.138370000 | -1.234252000 |
| 1  | -3.614799000 | 0.701925000  | -0.998356000 |
| 1  | -2.387348000 | 0.108374000  | -2.224999000 |
| 6  | 0.172195000  | -0.266738000 | 1.354982000  |
| 6  | -0.658694000 | -1.405901000 | 1.525370000  |
| 1  | 0.117841000  | 0.482509000  | 2.143421000  |
| 1  | -1.250953000 | -1.458955000 | 2.437102000  |
| 1  | -0.287603000 | -2.370303000 | 1.181142000  |
| 6  | 1.424811000  | -0.261191000 | 0.572268000  |
| 6  | 1.682820000  | -1.193238000 | -0.452865000 |
| 1  | 0.961773000  | -1.974161000 | -0.682655000 |
| 6  | 2.392229000  | 0.723606000  | 0.845870000  |
| 1  | 2.218417000  | 1.438162000  | 1.647298000  |
| 6  | 3.587343000  | 0.766581000  | 0.130398000  |
| 6  | 2.875094000  | -1.144308000 | -1.169804000 |
| 6  | 3.830066000  | -0.164544000 | -0.881296000 |
| 1  | 3.063467000  | -1.874033000 | -1.951430000 |
| 1  | 4.330494000  | 1.521927000  | 0.367149000  |
| 1  | 4.761092000  | -0.132618000 | -1.438886000 |
| 1  | -3.717955000 | -1.539980000 | -0.012083000 |

S17

E + ZPE = -2239.714462

|    |             |              |              |
|----|-------------|--------------|--------------|
| 28 | 1.353133000 | 0.244666000  | 0.169420000  |
| 15 | 2.988313000 | -1.100129000 | -0.280426000 |
| 1  | 4.255991000 | -0.706437000 | 0.191687000  |
| 1  | 3.287228000 | -1.342598000 | -1.635848000 |
| 1  | 2.962082000 | -2.426166000 | 0.193894000  |

|   |              |              |              |
|---|--------------|--------------|--------------|
| 6 | 2.208649000  | 1.575255000  | -1.024555000 |
| 6 | 1.056709000  | 2.154929000  | -0.453160000 |
| 1 | 0.239288000  | 1.162539000  | 0.562583000  |
| 1 | 0.169248000  | 2.280096000  | -1.071894000 |
| 1 | 3.186779000  | 1.896523000  | -0.671521000 |
| 1 | 2.175707000  | 1.254341000  | -2.064080000 |
| 6 | 0.547060000  | -1.100545000 | 1.325114000  |
| 6 | -0.405365000 | -0.041007000 | 1.271902000  |
| 1 | 1.121230000  | -1.222001000 | 2.242933000  |
| 1 | -0.470354000 | 0.562691000  | 2.179508000  |
| 1 | 1.182571000  | 2.910454000  | 0.321069000  |
| 1 | 0.309909000  | -2.033235000 | 0.817892000  |
| 6 | -1.683703000 | -0.130588000 | 0.508306000  |
| 6 | -2.794554000 | 0.588603000  | 0.972391000  |
| 1 | -2.707640000 | 1.195984000  | 1.870297000  |
| 6 | -1.810384000 | -0.905851000 | -0.656052000 |
| 1 | -0.963206000 | -1.470538000 | -1.039145000 |
| 6 | -3.029719000 | -0.975876000 | -1.325713000 |
| 6 | -4.016696000 | 0.511172000  | 0.305295000  |
| 6 | -4.136005000 | -0.269452000 | -0.845234000 |
| 1 | -4.872833000 | 1.060544000  | 0.684629000  |
| 1 | -3.118339000 | -1.582899000 | -2.221606000 |
| 1 | -5.086052000 | -0.327856000 | -1.367536000 |

S18

E + ZPE = -2744.684866

|    |              |              |              |
|----|--------------|--------------|--------------|
| 28 | -1.241007000 | -0.284661000 | -0.089089000 |
| 15 | 0.623159000  | 0.878159000  | 0.034831000  |
| 6  | 0.629243000  | 2.344091000  | -1.143275000 |
| 1  | 1.063515000  | 2.018650000  | -2.093338000 |
| 6  | 1.505040000  | 3.451824000  | -0.473549000 |
| 1  | 2.310613000  | 3.767693000  | -1.144119000 |
| 1  | 0.876581000  | 4.334052000  | -0.308486000 |
| 6  | 2.068944000  | 2.964349000  | 0.875370000  |
| 1  | 2.244393000  | 3.802501000  | 1.559239000  |
| 1  | 3.035752000  | 2.465854000  | 0.735047000  |
| 6  | 1.074632000  | 1.966498000  | 1.499304000  |
| 1  | 0.142776000  | 2.500782000  | 1.732479000  |
| 6  | 1.604775000  | 1.304443000  | 2.771569000  |
| 1  | 2.497950000  | 0.703609000  | 2.570099000  |
| 1  | 0.858247000  | 0.669971000  | 3.258391000  |
| 1  | 1.888171000  | 2.078661000  | 3.493254000  |
| 6  | -0.797931000 | 2.849877000  | -1.419151000 |
| 1  | -1.309885000 | 3.136042000  | -0.492717000 |
| 1  | -1.416020000 | 2.106373000  | -1.931056000 |
| 1  | -0.753026000 | 3.740216000  | -2.056092000 |
| 6  | 2.133430000  | -0.134341000 | -0.300577000 |
| 6  | 3.105610000  | 0.324537000  | -1.202205000 |
| 1  | 2.984420000  | 1.278543000  | -1.703077000 |
| 6  | 4.254349000  | -0.421342000 | -1.476131000 |
| 1  | 4.989660000  | -0.038445000 | -2.177406000 |
| 6  | 4.450595000  | -1.645120000 | -0.844559000 |
| 1  | 5.341184000  | -2.232947000 | -1.045149000 |
| 6  | 3.491865000  | -2.113090000 | 0.055221000  |
| 1  | 3.649861000  | -3.064685000 | 0.556814000  |
| 6  | 2.330759000  | -1.385688000 | 0.339071000  |
| 6  | 1.336205000  | -1.980234000 | 1.321894000  |
| 1  | 0.999422000  | -1.236916000 | 2.046417000  |
| 1  | 1.817496000  | -2.790208000 | 1.886174000  |
| 8  | 0.139507000  | -2.472289000 | 0.708093000  |
| 6  | 0.305277000  | -3.736538000 | 0.068808000  |
| 1  | 0.643510000  | -4.494439000 | 0.788113000  |

|   |              |              |              |
|---|--------------|--------------|--------------|
| 1 | -0.674069000 | -4.029046000 | -0.316197000 |
| 1 | 1.022257000  | -3.685416000 | -0.760673000 |
| 6 | -4.155648000 | 0.265218000  | 0.920899000  |
| 1 | -3.923515000 | 1.277191000  | 0.568085000  |
| 6 | -5.117307000 | -0.409501000 | -0.021566000 |
| 6 | -5.628196000 | 0.154662000  | -1.117469000 |
| 1 | -5.375196000 | 1.172350000  | -1.409674000 |
| 6 | -1.739834000 | 0.150442000  | 1.751100000  |
| 6 | -2.860711000 | -0.506080000 | 1.180792000  |
| 1 | -3.002228000 | -1.547256000 | 1.478831000  |
| 1 | -2.574257000 | -0.952362000 | -0.292905000 |
| 1 | -5.421278000 | -1.421824000 | 0.249706000  |
| 1 | -6.340744000 | -0.367922000 | -1.749069000 |
| 1 | -4.634367000 | 0.380432000  | 1.905500000  |
| 1 | -1.820149000 | 1.217619000  | 1.949961000  |
| 1 | -1.122525000 | -0.398924000 | 2.457128000  |
| 6 | -0.702050000 | -0.749098000 | -1.934454000 |
| 6 | -2.004303000 | -1.258201000 | -1.709740000 |
| 1 | 0.141900000  | -1.431773000 | -1.926318000 |
| 1 | -2.125342000 | -2.332130000 | -1.574441000 |
| 1 | -2.848083000 | -0.775208000 | -2.198451000 |
| 1 | -0.590729000 | 0.105076000  | -2.596905000 |

**S19R**

E + ZPE = -2859.012133

|    |              |              |              |
|----|--------------|--------------|--------------|
| 28 | 0.394423000  | 1.732303000  | 0.299573000  |
| 15 | -0.473134000 | -0.183334000 | 0.996538000  |
| 6  | 0.766731000  | -1.352943000 | 1.777392000  |
| 1  | 1.244888000  | -1.934413000 | 0.985045000  |
| 6  | -0.042248000 | -2.258963000 | 2.760756000  |
| 1  | -0.018292000 | -3.303427000 | 2.434721000  |
| 1  | 0.452529000  | -2.230821000 | 3.737378000  |
| 6  | -1.502918000 | -1.768859000 | 2.894266000  |
| 1  | -1.879747000 | -1.912809000 | 3.913069000  |
| 1  | -2.161646000 | -2.344532000 | 2.233758000  |
| 6  | -1.592001000 | -0.279422000 | 2.506710000  |
| 1  | -1.064495000 | 0.314862000  | 3.264465000  |
| 6  | -3.034397000 | 0.216988000  | 2.401284000  |
| 1  | -3.587055000 | -0.313000000 | 1.618536000  |
| 1  | -3.102465000 | 1.292134000  | 2.207193000  |
| 1  | -3.551501000 | 0.030150000  | 3.349146000  |
| 6  | 1.867738000  | -0.569769000 | 2.516334000  |
| 1  | 1.453709000  | 0.071747000  | 3.302827000  |
| 1  | 2.462870000  | 0.045781000  | 1.837276000  |
| 1  | 2.547623000  | -1.278648000 | 3.001654000  |
| 6  | -1.397371000 | -1.117210000 | -0.307090000 |
| 6  | -1.129325000 | -2.479920000 | -0.513388000 |
| 1  | -0.365366000 | -2.981486000 | 0.069198000  |
| 6  | -1.838308000 | -3.226675000 | -1.456609000 |
| 1  | -1.609814000 | -4.279765000 | -1.591196000 |
| 6  | -2.842744000 | -2.620305000 | -2.205073000 |
| 1  | -3.411834000 | -3.193304000 | -2.930883000 |
| 6  | -3.118497000 | -1.266805000 | -2.010736000 |
| 1  | -3.912651000 | -0.796402000 | -2.584981000 |
| 6  | -2.405855000 | -0.493804000 | -1.085464000 |
| 6  | -2.728275000 | 0.987575000  | -0.994113000 |
| 1  | -2.609453000 | 1.361603000  | 0.023745000  |
| 1  | -3.773701000 | 1.158520000  | -1.287455000 |
| 8  | -1.865882000 | 1.805528000  | -1.788554000 |
| 6  | -2.182925000 | 1.812004000  | -3.177898000 |
| 1  | -3.220651000 | 2.134506000  | -3.341499000 |
| 1  | -1.510700000 | 2.530886000  | -3.651910000 |

|   |              |              |              |
|---|--------------|--------------|--------------|
| 1 | -2.035918000 | 0.826665000  | -3.638599000 |
| 6 | -0.204368000 | 2.638410000  | 1.924670000  |
| 6 | 0.382959000  | 3.617872000  | 1.080648000  |
| 1 | 1.353276000  | 4.026148000  | 1.361822000  |
| 1 | 0.913379000  | 3.046045000  | -0.241555000 |
| 1 | 0.345809000  | 2.316072000  | 2.805890000  |
| 1 | -1.284886000 | 2.636596000  | 2.040743000  |
| 6 | 1.207143000  | 0.820140000  | -1.323113000 |
| 6 | 1.277116000  | 2.232134000  | -1.473411000 |
| 1 | 0.378114000  | 0.337457000  | -1.833117000 |
| 1 | 0.538568000  | 2.701712000  | -2.118239000 |
| 1 | 2.264112000  | 2.691891000  | -1.506369000 |
| 6 | 2.411720000  | -0.024371000 | -1.157096000 |
| 6 | 3.613656000  | 0.454900000  | -0.603757000 |
| 1 | 3.684776000  | 1.482197000  | -0.253864000 |
| 6 | 2.368380000  | -1.358956000 | -1.597595000 |
| 1 | 1.453428000  | -1.742564000 | -2.042058000 |
| 6 | 3.488726000  | -2.183617000 | -1.499163000 |
| 6 | 4.731567000  | -0.369593000 | -0.502010000 |
| 6 | 4.673824000  | -1.692711000 | -0.948585000 |
| 1 | 5.651311000  | 0.021696000  | -0.077004000 |
| 1 | 3.438615000  | -3.206586000 | -1.861059000 |
| 1 | 5.548328000  | -2.332045000 | -0.873743000 |
| 1 | -0.272913000 | 4.327843000  | 0.577628000  |

**S19S**

E + ZPE = -2859.013259

|    |              |              |              |
|----|--------------|--------------|--------------|
| 28 | 0.322084000  | -1.353757000 | 0.526333000  |
| 15 | -0.379505000 | 0.722573000  | 0.251951000  |
| 6  | 0.119204000  | 1.882600000  | 1.648760000  |
| 1  | -0.690347000 | 1.887516000  | 2.384798000  |
| 6  | 0.300793000  | 3.295408000  | 1.006414000  |
| 1  | -0.269580000 | 4.049107000  | 1.558934000  |
| 1  | 1.355993000  | 3.576972000  | 1.094917000  |
| 6  | -0.094910000 | 3.277965000  | -0.480937000 |
| 1  | 0.420499000  | 4.069178000  | -1.037695000 |
| 1  | -1.170063000 | 3.457429000  | -0.602077000 |
| 6  | 0.259419000  | 1.898259000  | -1.067415000 |
| 1  | 1.349143000  | 1.771984000  | -1.032662000 |
| 6  | -0.224499000 | 1.713839000  | -2.506105000 |
| 1  | -1.316083000 | 1.766149000  | -2.576350000 |
| 1  | 0.104461000  | 0.766400000  | -2.945841000 |
| 1  | 0.182144000  | 2.516127000  | -3.132076000 |
| 6  | 1.405352000  | 1.430567000  | 2.361474000  |
| 1  | 2.247194000  | 1.350231000  | 1.666351000  |
| 1  | 1.294020000  | 0.466456000  | 2.866692000  |
| 1  | 1.673038000  | 2.171942000  | 3.122825000  |
| 6  | -2.223670000 | 0.808069000  | 0.085473000  |
| 6  | -2.957718000 | 1.741701000  | 0.833147000  |
| 1  | -2.456437000 | 2.413230000  | 1.520615000  |
| 6  | -4.345232000 | 1.845863000  | 0.712022000  |
| 1  | -4.882265000 | 2.580072000  | 1.305066000  |
| 6  | -5.026605000 | 1.016680000  | -0.172680000 |
| 1  | -6.104204000 | 1.092311000  | -0.282058000 |
| 6  | -4.309859000 | 0.085783000  | -0.925203000 |
| 1  | -4.838946000 | -0.555509000 | -1.625903000 |
| 6  | -2.920787000 | -0.043190000 | -0.810416000 |
| 6  | -2.234146000 | -1.109475000 | -1.645433000 |
| 1  | -1.297031000 | -0.744338000 | -2.069550000 |
| 1  | -2.884077000 | -1.395186000 | -2.483916000 |
| 8  | -1.871322000 | -2.278481000 | -0.902944000 |
| 6  | -2.972909000 | -3.129712000 | -0.594768000 |

|   |              |              |              |
|---|--------------|--------------|--------------|
| 1 | -3.485714000 | -3.451211000 | -1.511546000 |
| 1 | -2.562982000 | -4.009749000 | -0.094136000 |
| 1 | -3.697712000 | -2.639666000 | 0.067689000  |
| 6 | 1.673890000  | -1.283809000 | -0.965329000 |
| 6 | 1.448254000  | -2.635082000 | -0.577832000 |
| 1 | 2.288042000  | -3.180657000 | -0.148638000 |
| 1 | 0.689442000  | -2.803322000 | 0.742780000  |
| 1 | 1.170782000  | -0.964807000 | -1.874881000 |
| 6 | -0.820659000 | -1.418272000 | 2.133730000  |
| 6 | -0.179339000 | -2.677386000 | 2.000117000  |
| 1 | -0.490005000 | -0.752784000 | 2.925682000  |
| 1 | -1.874326000 | -1.340197000 | 1.882862000  |
| 1 | -0.782832000 | -3.531534000 | 1.696399000  |
| 1 | 0.624408000  | -2.923448000 | 2.693467000  |
| 1 | 0.784591000  | -3.236614000 | -1.195736000 |
| 6 | 2.963878000  | -0.602410000 | -0.702557000 |
| 6 | 3.727811000  | -0.847945000 | 0.453272000  |
| 1 | 3.366647000  | -1.539541000 | 1.211113000  |
| 6 | 3.470039000  | 0.300253000  | -1.653891000 |
| 1 | 2.907084000  | 0.486230000  | -2.565549000 |
| 6 | 4.700977000  | 0.928193000  | -1.464830000 |
| 6 | 4.955947000  | -0.218547000 | 0.644284000  |
| 6 | 5.446874000  | 0.673358000  | -0.313196000 |
| 1 | 5.532081000  | -0.424855000 | 1.541615000  |
| 1 | 5.079470000  | 1.609776000  | -2.220996000 |
| 1 | 6.405748000  | 1.160484000  | -0.163853000 |

**S20R**

E + ZPE = -3089.988602

|    |              |              |              |
|----|--------------|--------------|--------------|
| 28 | -0.677144000 | -0.670861000 | -0.241021000 |
| 15 | 1.086698000  | -0.220279000 | 1.016159000  |
| 6  | 0.957344000  | 1.368751000  | 2.007222000  |
| 1  | 1.319920000  | 2.192602000  | 1.387303000  |
| 6  | 1.837166000  | 1.167906000  | 3.283636000  |
| 1  | 2.647500000  | 1.903105000  | 3.316250000  |
| 1  | 1.212446000  | 1.359162000  | 4.162908000  |
| 6  | 2.402912000  | -0.267433000 | 3.347213000  |
| 1  | 2.505588000  | -0.609616000 | 4.383258000  |
| 1  | 3.404683000  | -0.305326000 | 2.903837000  |
| 6  | 1.477288000  | -1.218691000 | 2.564279000  |
| 1  | 0.513860000  | -1.283150000 | 3.088134000  |
| 6  | 2.058287000  | -2.624935000 | 2.415901000  |
| 1  | 3.001402000  | -2.614516000 | 1.859447000  |
| 1  | 1.370956000  | -3.319169000 | 1.922063000  |
| 1  | 2.270236000  | -3.035868000 | 3.409356000  |
| 6  | -0.504945000 | 1.676400000  | 2.376424000  |
| 1  | -0.959055000 | 0.863036000  | 2.955182000  |
| 1  | -1.118797000 | 1.868044000  | 1.492647000  |
| 1  | -0.536011000 | 2.575281000  | 3.002377000  |
| 6  | 2.694306000  | -0.176380000 | 0.097399000  |
| 6  | 3.567569000  | 0.910340000  | 0.267984000  |
| 1  | 3.294717000  | 1.736454000  | 0.914335000  |
| 6  | 4.808066000  | 0.956883000  | -0.370934000 |
| 1  | 5.461009000  | 1.810772000  | -0.216394000 |
| 6  | 5.205484000  | -0.098404000 | -1.186495000 |
| 1  | 6.174241000  | -0.082564000 | -1.676681000 |
| 6  | 4.348868000  | -1.184526000 | -1.364254000 |
| 1  | 4.665427000  | -2.016380000 | -1.988469000 |
| 6  | 3.090387000  | -1.241552000 | -0.751558000 |
| 6  | 2.200160000  | -2.431419000 | -1.066673000 |
| 1  | 1.563192000  | -2.693470000 | -0.220316000 |
| 1  | 2.822034000  | -3.308880000 | -1.294507000 |

|   |              |              |              |
|---|--------------|--------------|--------------|
| 8 | 1.293944000  | -2.191051000 | -2.145462000 |
| 6 | 1.883642000  | -2.278225000 | -3.439152000 |
| 1 | 2.357472000  | -3.258583000 | -3.589259000 |
| 1 | 1.073659000  | -2.162088000 | -4.162882000 |
| 1 | 2.628452000  | -1.489755000 | -3.606987000 |
| 6 | -1.389572000 | -1.886479000 | 1.095806000  |
| 6 | -2.323283000 | -1.938781000 | 0.014553000  |
| 1 | -1.815031000 | -1.101004000 | -1.135370000 |
| 1 | -1.700610000 | -1.404474000 | 2.019556000  |
| 1 | -0.746328000 | -2.751152000 | 1.241700000  |
| 6 | -0.126728000 | 0.724034000  | -1.625803000 |
| 6 | -1.123643000 | -0.128966000 | -2.158624000 |
| 1 | 0.895885000  | 0.478841000  | -1.899095000 |
| 1 | -0.798514000 | -0.922704000 | -2.826079000 |
| 1 | -2.099431000 | 0.296194000  | -2.388874000 |
| 1 | -2.259493000 | -2.840124000 | -0.598946000 |
| 6 | -3.707462000 | -1.377833000 | 0.106279000  |
| 6 | -4.015247000 | -0.251342000 | 0.885772000  |
| 1 | -3.235500000 | 0.255245000  | 1.448806000  |
| 6 | -4.734327000 | -1.999952000 | -0.617668000 |
| 1 | -4.509721000 | -2.870483000 | -1.229599000 |
| 6 | -6.044896000 | -1.527620000 | -0.543172000 |
| 6 | -5.323826000 | 0.222983000  | 0.955724000  |
| 6 | -6.343041000 | -0.414840000 | 0.243551000  |
| 1 | -5.549229000 | 1.090538000  | 1.569217000  |
| 1 | -6.830497000 | -2.030401000 | -1.099344000 |
| 1 | -7.362269000 | -0.044846000 | 0.301985000  |
| 6 | -0.365496000 | 2.153298000  | -1.324493000 |
| 6 | 0.725849000  | 3.039551000  | -1.349523000 |
| 1 | 1.716929000  | 2.655247000  | -1.578012000 |
| 6 | -1.642322000 | 2.676144000  | -1.044608000 |
| 1 | -2.509133000 | 2.020499000  | -1.009016000 |
| 6 | -1.818081000 | 4.038246000  | -0.811789000 |
| 6 | 0.548672000  | 4.403866000  | -1.118352000 |
| 6 | -0.724295000 | 4.907738000  | -0.847433000 |
| 1 | 1.403122000  | 5.072887000  | -1.159679000 |
| 1 | -2.812327000 | 4.423761000  | -0.605055000 |
| 1 | -0.865778000 | 5.969885000  | -0.671173000 |

**S20S**

E + ZPE = -3089.989333

|    |              |              |              |
|----|--------------|--------------|--------------|
| 28 | 0.394619000  | -0.424140000 | -0.449955000 |
| 15 | -1.328613000 | 0.645778000  | 0.417210000  |
| 6  | -1.032381000 | 1.374755000  | 2.126274000  |
| 1  | -1.336916000 | 0.628501000  | 2.866074000  |
| 6  | -1.920104000 | 2.657859000  | 2.221761000  |
| 1  | -2.548491000 | 2.629558000  | 3.117954000  |
| 1  | -1.257143000 | 3.522959000  | 2.335003000  |
| 6  | -2.774196000 | 2.834994000  | 0.952592000  |
| 1  | -3.018516000 | 3.890187000  | 0.783474000  |
| 1  | -3.728659000 | 2.303546000  | 1.047126000  |
| 6  | -1.998968000 | 2.268917000  | -0.252253000 |
| 1  | -1.101811000 | 2.881082000  | -0.412106000 |
| 6  | -2.828064000 | 2.236617000  | -1.537094000 |
| 1  | -3.704153000 | 1.587895000  | -1.434098000 |
| 1  | -2.252680000 | 1.902439000  | -2.407016000 |
| 1  | -3.192431000 | 3.245448000  | -1.761933000 |
| 6  | 0.448459000  | 1.706268000  | 2.369870000  |
| 1  | 0.835470000  | 2.411215000  | 1.627474000  |
| 1  | 1.081681000  | 0.815359000  | 2.347318000  |
| 1  | 0.557578000  | 2.168240000  | 3.357620000  |
| 6  | -2.825550000 | -0.443128000 | 0.538172000  |

|   |              |              |              |
|---|--------------|--------------|--------------|
| 6 | -3.580493000 | -0.470999000 | 1.721184000  |
| 1 | -3.285051000 | 0.126517000  | 2.575692000  |
| 6 | -4.733008000 | -1.251226000 | 1.834769000  |
| 1 | -5.293799000 | -1.248995000 | 2.764673000  |
| 6 | -5.160037000 | -2.014974000 | 0.753441000  |
| 1 | -6.060194000 | -2.618036000 | 0.824357000  |
| 6 | -4.422426000 | -1.994237000 | -0.430296000 |
| 1 | -4.762425000 | -2.579468000 | -1.281150000 |
| 6 | -3.255533000 | -1.231454000 | -0.560519000 |
| 6 | -2.500515000 | -1.313367000 | -1.875722000 |
| 1 | -2.086536000 | -0.345103000 | -2.163052000 |
| 1 | -3.187438000 | -1.627077000 | -2.674159000 |
| 8 | -1.375402000 | -2.197385000 | -1.839974000 |
| 6 | -1.723544000 | -3.578654000 | -1.879814000 |
| 1 | -2.326813000 | -3.804732000 | -2.770135000 |
| 1 | -0.787515000 | -4.139036000 | -1.937381000 |
| 1 | -2.276116000 | -3.890096000 | -0.984183000 |
| 6 | 0.861002000  | 1.013268000  | -1.797289000 |
| 1 | 1.436847000  | -0.223236000 | -2.184196000 |
| 1 | 2.523238000  | -0.305232000 | -2.177695000 |
| 1 | 1.413308000  | -1.347278000 | -1.068734000 |
| 1 | -0.039904000 | 1.308069000  | -2.329709000 |
| 6 | 0.251820000  | -1.734034000 | 1.002418000  |
| 6 | 1.276193000  | -2.236866000 | 0.143227000  |
| 1 | -0.711239000 | -2.234750000 | 0.972734000  |
| 1 | 0.956641000  | -3.057300000 | -0.501045000 |
| 1 | 0.940933000  | -0.798038000 | -2.963773000 |
| 1 | 0.533457000  | -1.363717000 | 1.984536000  |
| 6 | 2.721100000  | -2.323537000 | 0.523942000  |
| 6 | 3.305271000  | -1.509066000 | 1.506544000  |
| 1 | 2.707382000  | -0.771233000 | 2.033817000  |
| 6 | 3.526895000  | -3.263186000 | -0.136459000 |
| 1 | 3.089493000  | -3.902508000 | -0.900179000 |
| 6 | 4.875825000  | -3.403285000 | 0.188955000  |
| 6 | 4.654170000  | -1.646376000 | 1.829888000  |
| 6 | 5.443603000  | -2.593987000 | 1.173269000  |
| 1 | 5.088876000  | -1.015414000 | 2.599752000  |
| 1 | 5.479832000  | -4.145318000 | -0.324716000 |
| 1 | 6.493332000  | -2.700749000 | 1.429783000  |
| 6 | 1.668202000  | 2.141542000  | -1.277527000 |
| 6 | 2.841006000  | 1.949428000  | -0.523092000 |
| 1 | 3.181177000  | 0.945426000  | -0.281000000 |
| 6 | 1.269205000  | 3.459217000  | -1.563183000 |
| 1 | 0.381972000  | 3.628927000  | -2.168808000 |
| 6 | 2.016920000  | 4.549172000  | -1.118271000 |
| 6 | 3.586075000  | 3.038696000  | -0.077226000 |
| 6 | 3.176783000  | 4.342602000  | -0.370052000 |
| 1 | 4.490521000  | 2.869672000  | 0.500109000  |
| 1 | 1.697500000  | 5.557816000  | -1.363762000 |
| 1 | 3.761189000  | 5.189225000  | -0.022376000 |

41  
E + ZPE = -2975.665116

|    |              |              |              |
|----|--------------|--------------|--------------|
| 28 | -1.058367000 | -0.541827000 | -0.076569000 |
| 15 | 0.853214000  | -0.628534000 | 0.897363000  |
| 6  | 1.606561000  | 0.827673000  | 1.809262000  |
| 1  | 2.225844000  | 1.377140000  | 1.093668000  |
| 6  | 2.470833000  | 0.217128000  | 2.964865000  |
| 1  | 3.502146000  | 0.581577000  | 2.912468000  |
| 1  | 2.065081000  | 0.577473000  | 3.916601000  |
| 6  | 2.430508000  | -1.326010000 | 2.945857000  |
| 1  | 2.571343000  | -1.737611000 | 3.951975000  |

|   |              |              |              |
|---|--------------|--------------|--------------|
| 1 | 3.240093000  | -1.730781000 | 2.326806000  |
| 6 | 1.078878000  | -1.776227000 | 2.365120000  |
| 1 | 0.280483000  | -1.476367000 | 3.058443000  |
| 6 | 0.967657000  | -3.278198000 | 2.105262000  |
| 1 | 1.696840000  | -3.614828000 | 1.360113000  |
| 1 | -0.035897000 | -3.563342000 | 1.769230000  |
| 1 | 1.166110000  | -3.831324000 | 3.029981000  |
| 6 | 0.548382000  | 1.796964000  | 2.357611000  |
| 1 | -0.136870000 | 1.295891000  | 3.049873000  |
| 1 | -0.037778000 | 2.263517000  | 1.563597000  |
| 1 | 1.050196000  | 2.596085000  | 2.914872000  |
| 6 | 2.127727000  | -1.184344000 | -0.323987000 |
| 6 | 3.444098000  | -0.701717000 | -0.300585000 |
| 1 | 3.747403000  | 0.026079000  | 0.443718000  |
| 6 | 4.397490000  | -1.149914000 | -1.218444000 |
| 1 | 5.411464000  | -0.763881000 | -1.171308000 |
| 6 | 4.047107000  | -2.089868000 | -2.183635000 |
| 1 | 4.782238000  | -2.445138000 | -2.899259000 |
| 6 | 2.736923000  | -2.568396000 | -2.230889000 |
| 1 | 2.458486000  | -3.297079000 | -2.988428000 |
| 6 | 1.773454000  | -2.129559000 | -1.317531000 |
| 6 | 0.364526000  | -2.660309000 | -1.431210000 |
| 1 | 0.000615000  | -3.098805000 | -0.501228000 |
| 1 | 0.299700000  | -3.424820000 | -2.212167000 |
| 8 | -0.597125000 | -1.612823000 | -1.746776000 |
| 6 | -0.525570000 | -1.205979000 | -3.127374000 |
| 1 | -0.646969000 | -2.086672000 | -3.766175000 |
| 1 | -1.348390000 | -0.517281000 | -3.309109000 |
| 1 | 0.431705000  | -0.720809000 | -3.341530000 |
| 6 | -4.513672000 | -0.446756000 | 0.659114000  |
| 1 | -4.450686000 | 0.604298000  | 0.344270000  |
| 6 | -5.443134000 | -1.203823000 | -0.249530000 |
| 6 | -6.525256000 | -1.870545000 | 0.152053000  |
| 1 | -6.822775000 | -1.901413000 | 1.198256000  |
| 6 | -2.054211000 | -0.245902000 | 1.467905000  |
| 6 | -3.088465000 | -1.040929000 | 0.702408000  |
| 1 | -3.127434000 | -2.081227000 | 1.039830000  |
| 1 | -2.766400000 | -1.127028000 | -0.387072000 |
| 1 | -5.187605000 | -1.194973000 | -1.311469000 |
| 1 | -7.162677000 | -2.401950000 | -0.548727000 |
| 1 | -4.907073000 | -0.443463000 | 1.682163000  |
| 1 | -2.328413000 | 0.795386000  | 1.660760000  |
| 1 | -1.734822000 | -0.720628000 | 2.396802000  |
| 6 | -0.913069000 | 1.975794000  | -1.720047000 |
| 6 | -2.106463000 | 1.423813000  | -1.408758000 |
| 1 | -0.345444000 | 1.543023000  | -2.543246000 |
| 1 | -2.568885000 | 0.686921000  | -2.058184000 |
| 1 | -2.745029000 | 1.846531000  | -0.639353000 |
| 6 | -0.279829000 | 3.145110000  | -1.099973000 |
| 6 | 1.081927000  | 3.394444000  | -1.351979000 |
| 1 | 1.637705000  | 2.714048000  | -1.993587000 |
| 6 | -0.990268000 | 4.056680000  | -0.295690000 |
| 1 | -2.053254000 | 3.914666000  | -0.124059000 |
| 6 | -0.351157000 | 5.163898000  | 0.255013000  |
| 6 | 1.722714000  | 4.500210000  | -0.796160000 |
| 6 | 1.007822000  | 5.386819000  | 0.011810000  |
| 1 | 2.773967000  | 4.678037000  | -1.003875000 |
| 1 | -0.916014000 | 5.863722000  | 0.863967000  |
| 1 | 1.501003000  | 6.256433000  | 0.436164000  |

42  
E + ZPE = -2975.687892

|    |              |              |              |
|----|--------------|--------------|--------------|
| 28 | 0.485035000  | -0.362991000 | -0.695998000 |
| 15 | -1.277149000 | 0.119534000  | 0.669306000  |
| 6  | -1.071347000 | -0.563753000 | 2.420815000  |
| 1  | -2.024686000 | -1.051064000 | 2.658231000  |
| 6  | -0.923465000 | 0.694930000  | 3.304570000  |
| 1  | -1.143514000 | 0.450822000  | 4.350043000  |
| 1  | 0.117331000  | 1.044228000  | 3.272106000  |
| 6  | -1.854717000 | 1.782868000  | 2.757103000  |
| 1  | -1.674206000 | 2.752129000  | 3.236012000  |
| 1  | -2.902000000 | 1.523235000  | 2.960164000  |
| 6  | -1.617923000 | 1.888884000  | 1.233940000  |
| 1  | -0.661820000 | 2.401341000  | 1.086020000  |
| 6  | -2.692067000 | 2.657215000  | 0.459564000  |
| 1  | -3.680018000 | 2.199083000  | 0.560422000  |
| 1  | -2.457920000 | 2.723803000  | -0.608482000 |
| 1  | -2.756083000 | 3.680890000  | 0.844935000  |
| 6  | 0.057194000  | -1.583655000 | 2.594391000  |
| 1  | 1.031342000  | -1.159258000 | 2.327084000  |
| 1  | -0.105405000 | -2.479211000 | 1.983840000  |
| 1  | 0.110016000  | -1.907565000 | 3.640287000  |
| 6  | -2.885104000 | -0.551608000 | 0.055578000  |
| 6  | -4.027348000 | -0.502832000 | 0.872032000  |
| 1  | -3.960237000 | -0.100270000 | 1.877423000  |
| 6  | -5.266308000 | -0.955775000 | 0.419000000  |
| 1  | -6.132589000 | -0.899041000 | 1.071213000  |
| 6  | -5.383756000 | -1.480396000 | -0.866593000 |
| 1  | -6.342014000 | -1.839545000 | -1.229153000 |
| 6  | -4.255307000 | -1.559041000 | -1.681264000 |
| 1  | -4.341105000 | -1.988939000 | -2.676147000 |
| 6  | -3.010051000 | -1.097054000 | -1.241281000 |
| 6  | -1.827494000 | -1.227593000 | -2.171045000 |
| 1  | -1.459744000 | -0.257317000 | -2.520091000 |
| 1  | -2.099422000 | -1.816083000 | -3.054480000 |
| 8  | -0.683826000 | -1.853855000 | -1.542643000 |
| 6  | -0.930661000 | -3.209935000 | -1.123048000 |
| 1  | -1.223898000 | -3.809201000 | -1.991241000 |
| 1  | 0.003156000  | -3.595423000 | -0.714211000 |
| 1  | -1.714648000 | -3.249502000 | -0.361529000 |
| 6  | 1.756545000  | 3.700455000  | -0.501327000 |
| 1  | 2.842938000  | 3.532780000  | -0.461997000 |
| 6  | 1.452708000  | 4.878791000  | -1.386096000 |
| 6  | 0.800649000  | 5.976469000  | -1.001484000 |
| 1  | 0.446582000  | 6.104270000  | 0.019925000  |
| 6  | 1.416719000  | 1.191737000  | -0.112794000 |
| 6  | 1.079644000  | 2.397216000  | -0.994657000 |
| 1  | -0.003400000 | 2.571836000  | -1.042618000 |
| 1  | 1.393950000  | 2.215293000  | -2.030868000 |
| 1  | 1.796117000  | 4.799748000  | -2.419025000 |
| 1  | 0.608221000  | 6.797855000  | -1.685921000 |
| 1  | 1.436780000  | 3.915739000  | 0.526957000  |
| 1  | 2.491014000  | 0.988161000  | -0.138428000 |
| 1  | 1.183887000  | 1.414483000  | 0.936698000  |
| 6  | 2.199793000  | -1.526130000 | -1.225187000 |
| 6  | 1.821603000  | -0.645410000 | -2.222701000 |
| 1  | 1.717842000  | -2.502219000 | -1.219615000 |
| 1  | 1.179452000  | -0.987568000 | -3.029715000 |
| 1  | 2.407052000  | 0.243425000  | -2.431729000 |
| 6  | 3.392423000  | -1.463257000 | -0.368391000 |
| 6  | 3.491382000  | -2.351171000 | 0.719384000  |
| 1  | 2.683395000  | -3.054445000 | 0.908879000  |
| 6  | 4.464372000  | -0.585244000 | -0.616300000 |
| 1  | 4.436968000  | 0.075059000  | -1.477789000 |
| 6  | 5.583911000  | -0.583078000 | 0.211182000  |
| 6  | 4.609519000  | -2.346499000 | 1.549157000  |

|   |             |              |             |
|---|-------------|--------------|-------------|
| 6 | 5.657672000 | -1.457938000 | 1.298959000 |
| 1 | 4.668953000 | -3.039976000 | 2.382767000 |
| 1 | 6.407670000 | 0.092294000  | 0.000012000 |
| 1 | 6.535386000 | -1.457433000 | 1.938470000 |

**43**

E + ZPE = -2975.662217

|    |              |              |              |
|----|--------------|--------------|--------------|
| 28 | -0.812219000 | -0.594051000 | -0.062755000 |
| 15 | 1.050178000  | 0.060498000  | 0.866142000  |
| 6  | 1.263542000  | 1.849954000  | 1.379472000  |
| 1  | 1.455247000  | 2.453817000  | 0.488353000  |
| 6  | 2.475711000  | 1.870939000  | 2.364863000  |
| 1  | 3.345022000  | 2.348133000  | 1.902562000  |
| 1  | 2.207687000  | 2.492578000  | 3.225438000  |
| 6  | 2.837267000  | 0.437669000  | 2.830005000  |
| 1  | 3.091535000  | 0.416424000  | 3.895541000  |
| 1  | 3.719419000  | 0.073028000  | 2.290984000  |
| 6  | 1.659203000  | -0.516451000 | 2.2591633000 |
| 1  | 0.828347000  | -0.250698000 | 3.219546000  |
| 6  | 2.008468000  | -1.986035000 | 2.780071000  |
| 1  | 2.821212000  | -2.316115000 | 2.124294000  |
| 1  | 1.147701000  | -2.648685000 | 2.638278000  |
| 1  | 2.350944000  | -2.120796000 | 3.812243000  |
| 6  | -0.008677000 | 2.396189000  | 2.050906000  |
| 1  | -0.275971000 | 1.825159000  | 2.946919000  |
| 1  | -0.864514000 | 2.404063000  | 1.374156000  |
| 1  | 0.174817000  | 3.428397000  | 2.368473000  |
| 6  | 2.413013000  | -0.325132000 | -0.325304000 |
| 6  | 3.331983000  | 0.659906000  | -0.717097000 |
| 1  | 3.266353000  | 1.663969000  | -0.314389000 |
| 6  | 4.360422000  | 0.373515000  | -1.617907000 |
| 1  | 5.063240000  | 1.153133000  | -1.896394000 |
| 6  | 4.484412000  | -0.908300000 | -2.146186000 |
| 1  | 5.284521000  | -1.142084000 | -2.841929000 |
| 6  | 3.567537000  | -1.893907000 | -1.777665000 |
| 1  | 3.662173000  | -2.895445000 | -2.190124000 |
| 6  | 2.527343000  | -1.623413000 | -0.882702000 |
| 6  | 1.529272000  | -2.715797000 | -0.566503000 |
| 1  | 1.319861000  | -2.782732000 | -0.500015000 |
| 1  | 1.915860000  | -3.689357000 | -0.890614000 |
| 8  | 0.244873000  | -2.487943000 | -1.179252000 |
| 6  | 0.186403000  | -2.944714000 | -2.535653000 |
| 1  | 0.515533000  | -3.988967000 | -2.595481000 |
| 1  | -0.856031000 | -2.892801000 | -2.852686000 |
| 1  | 0.807533000  | -2.328754000 | -3.197367000 |
| 6  | -3.973315000 | -1.596160000 | 0.858095000  |
| 1  | -4.200730000 | -0.607556000 | 0.432181000  |
| 6  | -4.637917000 | -2.676068000 | 0.048985000  |
| 6  | -5.491268000 | -3.575411000 | 0.538507000  |
| 1  | -5.780050000 | -3.579147000 | 1.587590000  |
| 6  | -1.695743000 | -0.630125000 | 1.595650000  |
| 6  | -2.438971000 | -1.755229000 | 0.934178000  |
| 1  | -2.166357000 | -2.724491000 | 1.362332000  |
| 1  | -2.096950000 | -1.847845000 | -0.151717000 |
| 1  | -4.381875000 | -2.707021000 | -1.012173000 |
| 1  | -5.943185000 | -4.336505000 | -0.090935000 |
| 1  | -4.367268000 | -1.594971000 | 1.880856000  |
| 1  | -2.266292000 | 0.290300000  | 1.753747000  |
| 1  | -1.161424000 | -0.914001000 | 2.501018000  |
| 6  | -0.926068000 | 0.929061000  | -1.697818000 |
| 6  | -1.775499000 | -0.132372000 | -1.912280000 |
| 1  | 0.075515000  | 0.861976000  | -2.123055000 |

|   |              |              |              |
|---|--------------|--------------|--------------|
| 1 | -1.474966000 | -0.938241000 | -2.570376000 |
| 1 | -2.846754000 | -0.024533000 | -1.762816000 |
| 6 | -1.327325000 | 2.292826000  | -1.300803000 |
| 6 | -0.424787000 | 3.347742000  | -1.519907000 |
| 1 | 0.548664000  | 3.133472000  | -1.955911000 |
| 6 | -2.592731000 | 2.598925000  | -0.766377000 |
| 1 | -3.318663000 | 1.809166000  | -0.592672000 |
| 6 | -2.936607000 | 3.912645000  | -0.459871000 |
| 6 | -0.770240000 | 4.664604000  | -1.217342000 |
| 6 | -2.026756000 | 4.951109000  | -0.682547000 |
| 1 | -0.061942000 | 5.465947000  | -1.406857000 |
| 1 | -3.919363000 | 4.129657000  | -0.051386000 |
| 1 | -2.300424000 | 5.975218000  | -0.447037000 |

**44**

E + ZPE = -2975.672191

|    |              |              |              |
|----|--------------|--------------|--------------|
| 28 | -0.454082000 | -0.366220000 | 0.246160000  |
| 15 | 1.406733000  | 0.676726000  | 0.612595000  |
| 6  | 1.277343000  | 2.545175000  | 0.529672000  |
| 1  | 1.231121000  | 2.868682000  | -0.515253000 |
| 6  | 2.545949000  | 3.102840000  | 1.241722000  |
| 1  | 3.249228000  | 3.517560000  | 0.513653000  |
| 1  | 2.243891000  | 3.935462000  | 1.885568000  |
| 6  | 3.233564000  | 1.991728000  | 2.073861000  |
| 1  | 3.562095000  | 2.366901000  | 3.049194000  |
| 1  | 4.133633000  | 1.637921000  | 1.557369000  |
| 6  | 2.284123000  | 0.789626000  | 2.271668000  |
| 1  | 1.475924000  | 1.070329000  | 2.960178000  |
| 6  | 3.017079000  | -0.421554000 | 2.848960000  |
| 1  | 3.802019000  | -0.778939000 | 2.173915000  |
| 1  | 2.346476000  | -1.252971000 | 3.083907000  |
| 1  | 3.504651000  | -0.129310000 | 3.785861000  |
| 6  | -0.006617000 | 3.013787000  | 1.241999000  |
| 1  | -0.002445000 | 2.741122000  | 2.302838000  |
| 1  | -0.913408000 | 2.599458000  | 0.794544000  |
| 1  | -0.070969000 | 4.106335000  | 1.189371000  |
| 6  | 2.668564000  | 0.125424000  | -0.621490000 |
| 6  | 3.295584000  | 1.067608000  | -1.451255000 |
| 1  | 3.063423000  | 2.122302000  | -1.357133000 |
| 6  | 4.238229000  | 0.681163000  | -2.406542000 |
| 1  | 4.711363000  | 1.433295000  | -3.030699000 |
| 6  | 4.569936000  | -0.662803000 | -2.545385000 |
| 1  | 5.306594000  | -0.975547000 | -3.279213000 |
| 6  | 3.947398000  | -1.610989000 | -1.731759000 |
| 1  | 4.212118000  | -2.660238000 | -1.836638000 |
| 6  | 2.991760000  | -1.248888000 | -0.776027000 |
| 6  | 2.336338000  | -2.353293000 | 0.038560000  |
| 1  | 2.235584000  | -2.068928000 | 1.085002000  |
| 1  | 2.962095000  | -3.255478000 | 0.000819000  |
| 8  | 1.006673000  | -2.676249000 | -0.379863000 |
| 6  | 0.952495000  | -3.487755000 | -1.549927000 |
| 1  | 1.500823000  | -4.427138000 | -1.395972000 |
| 1  | -0.100177000 | -3.716859000 | -1.728029000 |
| 1  | 1.364666000  | -2.973149000 | -2.427660000 |
| 6  | -3.088989000 | -1.695728000 | 2.053373000  |
| 1  | -3.451109000 | -0.660965000 | 2.063204000  |
| 6  | -4.097529000 | -2.603813000 | 1.402982000  |
| 6  | -5.304819000 | -2.229834000 | 0.977439000  |
| 1  | -5.648719000 | -1.201799000 | 1.065761000  |
| 6  | -0.610800000 | -0.950730000 | 2.032732000  |
| 6  | -1.693764000 | -1.764410000 | 1.398502000  |
| 1  | -1.371498000 | -2.798807000 | 1.248182000  |

|   |              |              |              |
|---|--------------|--------------|--------------|
| 1 | -1.862068000 | -1.405184000 | 0.312929000  |
| 1 | -3.802210000 | -3.650690000 | 1.313456000  |
| 1 | -6.002848000 | -2.942282000 | 0.546726000  |
| 1 | -2.956020000 | -1.995725000 | 3.102250000  |
| 1 | -0.951711000 | -0.178358000 | 2.728108000  |
| 1 | 0.213814000  | -1.525452000 | 2.450930000  |
| 6 | -1.164697000 | 0.735115000  | -1.478116000 |
| 6 | -0.664365000 | -0.501547000 | -1.821652000 |
| 1 | -0.483897000 | 1.580821000  | -1.554131000 |
| 1 | 0.349829000  | -0.586520000 | -2.195512000 |
| 1 | -1.321535000 | -1.335495000 | -2.053194000 |
| 6 | -2.581894000 | 1.124561000  | -1.353415000 |
| 6 | -3.643691000 | 0.202458000  | -1.415623000 |
| 1 | -3.446478000 | -0.860517000 | -1.519113000 |
| 6 | -2.892240000 | 2.492389000  | -1.234008000 |
| 1 | -2.086822000 | 3.222075000  | -1.210197000 |
| 6 | -4.214201000 | 2.928202000  | -1.182352000 |
| 6 | -4.964251000 | 0.638738000  | -1.365322000 |
| 6 | -5.255399000 | 2.001219000  | -1.247153000 |
| 1 | -5.769774000 | -0.086569000 | -1.427395000 |
| 1 | -4.430634000 | 3.989202000  | -1.101115000 |
| 1 | -6.287731000 | 2.336576000  | -1.213674000 |

**45**

E + ZPE = -2975.671214

|    |              |              |              |
|----|--------------|--------------|--------------|
| 28 | -0.304539000 | 0.821381000  | -0.432077000 |
| 15 | 1.013502000  | -0.432267000 | 0.758189000  |
| 6  | 1.719148000  | 0.195604000  | 2.395111000  |
| 1  | 2.737638000  | -0.206448000 | 2.436042000  |
| 6  | 0.880590000  | -0.529579000 | 3.468125000  |
| 1  | 1.382788000  | -0.480322000 | 4.441206000  |
| 1  | -0.090703000 | -0.031591000 | 3.587685000  |
| 6  | 0.675662000  | -1.977302000 | 3.002640000  |
| 1  | -0.049667000 | -2.508854000 | 3.629073000  |
| 1  | 1.621459000  | -2.530403000 | 3.079247000  |
| 6  | 0.202667000  | -1.955605000 | 1.531402000  |
| 1  | -0.864498000 | -1.703851000 | 1.513980000  |
| 6  | 0.400416000  | -3.275005000 | 0.782195000  |
| 1  | 1.447010000  | -3.593438000 | 0.851290000  |
| 1  | 0.076428000  | -3.205797000 | -0.261373000 |
| 1  | -0.190861000 | -4.063817000 | 1.260701000  |
| 6  | 1.815466000  | 1.710899000  | 2.567571000  |
| 1  | 0.828760000  | 2.179614000  | 2.599989000  |
| 1  | 2.390701000  | 2.179589000  | 1.761386000  |
| 1  | 2.321996000  | 1.946122000  | 3.510641000  |
| 6  | 2.511721000  | -0.991058000 | -0.181702000 |
| 6  | 3.500675000  | -1.735175000 | 0.486859000  |
| 1  | 3.368529000  | -1.997507000 | 1.531445000  |
| 6  | 4.659894000  | -2.165512000 | -0.156201000 |
| 1  | 5.397203000  | -2.744977000 | 0.391189000  |
| 6  | 4.866331000  | -1.841179000 | -1.495051000 |
| 1  | 5.770752000  | -2.155905000 | -2.006597000 |
| 6  | 3.901987000  | -1.100374000 | -2.174128000 |
| 1  | 4.064003000  | -0.844796000 | -3.218421000 |
| 6  | 2.720756000  | -0.683790000 | -1.546012000 |
| 6  | 1.703294000  | 0.017461000  | -2.420588000 |
| 1  | 0.867585000  | -0.643686000 | -2.664116000 |
| 1  | 2.169325000  | 0.321178000  | -3.364371000 |
| 8  | 1.086022000  | 1.185622000  | -1.838408000 |
| 6  | 1.995625000  | 2.288235000  | -1.642157000 |
| 1  | 2.497240000  | 2.509049000  | -2.589613000 |
| 1  | 1.395871000  | 3.146057000  | -1.336200000 |

|   |              |              |              |
|---|--------------|--------------|--------------|
| 1 | 2.737731000  | 2.048915000  | -0.874407000 |
| 6 | -1.315083000 | 3.752630000  | 1.130911000  |
| 1 | -0.357797000 | 3.608388000  | 1.642648000  |
| 6 | -1.266253000 | 5.018819000  | 0.318790000  |
| 6 | -0.189021000 | 5.795137000  | 0.185482000  |
| 1 | 0.745084000  | 5.570988000  | 0.698082000  |
| 6 | -1.543498000 | 1.157096000  | 0.936208000  |
| 6 | -1.648472000 | 2.516411000  | 0.275097000  |
| 1 | -0.943865000 | 2.552446000  | -0.617582000 |
| 1 | -2.624393000 | 2.649271000  | -0.205342000 |
| 1 | -1.171075000 | 1.198978000  | 1.961649000  |
| 1 | -2.449305000 | 0.549799000  | 0.894062000  |
| 6 | -1.918019000 | -0.715105000 | -1.832479000 |
| 6 | -1.801410000 | 0.579123000  | -2.234765000 |
| 1 | -1.159724000 | -1.424541000 | -2.164011000 |
| 1 | -2.603969000 | 1.292068000  | -2.076209000 |
| 1 | -1.057907000 | 0.864009000  | -2.970687000 |
| 6 | -3.036097000 | -1.333165000 | -1.110257000 |
| 6 | -2.995445000 | -2.717255000 | -0.860090000 |
| 1 | -2.135441000 | -3.292973000 | -1.192979000 |
| 6 | -4.177793000 | -0.616726000 | -0.700047000 |
| 1 | -4.257709000 | 0.446556000  | -0.906079000 |
| 6 | -5.227057000 | -1.261172000 | -0.051646000 |
| 6 | -4.047234000 | -3.363678000 | -0.214192000 |
| 6 | -5.165294000 | -2.636030000 | 0.196313000  |
| 1 | -3.997889000 | -4.434379000 | -0.038959000 |
| 1 | -6.101416000 | -0.693073000 | 0.252228000  |
| 1 | -5.988970000 | -3.136428000 | 0.696804000  |
| 1 | -2.084837000 | 3.832217000  | 1.911231000  |
| 1 | -0.206382000 | 6.700087000  | -0.415036000 |
| 1 | -2.188680000 | 5.295580000  | -0.194183000 |

**46**  
E + ZPE = -2975.683701

|    |              |              |              |
|----|--------------|--------------|--------------|
| 28 | 0.417662000  | -0.032107000 | -0.897884000 |
| 15 | -1.201449000 | -0.554966000 | 0.605908000  |
| 6  | -1.363480000 | -2.287121000 | 1.353414000  |
| 1  | -2.440116000 | -2.483127000 | 1.363729000  |
| 6  | -0.886813000 | -2.128827000 | 2.815981000  |
| 1  | -1.285747000 | -2.942761000 | 3.432312000  |
| 1  | 0.207277000  | -2.207634000 | 2.858866000  |
| 6  | -1.330390000 | -0.752555000 | 3.328120000  |
| 1  | -0.870282000 | -0.510229000 | 4.293050000  |
| 1  | -2.416847000 | -0.737678000 | 3.485882000  |
| 6  | -0.941627000 | 0.302621000  | 2.269820000  |
| 1  | 0.143829000  | 0.454576000  | 2.317980000  |
| 6  | -1.628559000 | 1.659644000  | 2.431647000  |
| 1  | -2.717040000 | 1.577923000  | 2.353863000  |
| 1  | -1.285018000 | 2.381445000  | 1.682598000  |
| 1  | -1.393024000 | 2.075297000  | 3.417740000  |
| 6  | -0.701712000 | -3.437645000 | 0.592150000  |
| 1  | 0.387433000  | -3.362479000 | 0.604609000  |
| 1  | -1.033974000 | -3.485668000 | -0.450945000 |
| 1  | -0.970890000 | -4.389541000 | 1.063971000  |
| 6  | -2.925387000 | -0.134483000 | 0.057522000  |
| 6  | -4.027901000 | -0.564672000 | 0.817933000  |
| 1  | -3.875549000 | -1.131914000 | 1.729340000  |
| 6  | -5.339514000 | -0.272622000 | 0.445337000  |
| 1  | -6.163377000 | -0.617299000 | 1.062963000  |
| 6  | -5.583011000 | 0.452862000  | -0.717953000 |
| 1  | -6.599225000 | 0.675520000  | -1.028394000 |
| 6  | -4.505644000 | 0.889850000  | -1.485239000 |

|   |              |              |              |
|---|--------------|--------------|--------------|
| 1 | -4.691966000 | 1.458746000  | -2.392848000 |
| 6 | -3.183475000 | 0.623495000  | -1.108039000 |
| 6 | -2.096464000 | 1.244288000  | -1.954570000 |
| 1 | -1.615007000 | 2.076759000  | -1.432865000 |
| 1 | -2.521798000 | 1.638345000  | -2.884155000 |
| 8 | -1.011110000 | 0.360358000  | -2.305830000 |
| 6 | -1.395179000 | -0.729495000 | -3.166073000 |
| 1 | -1.883448000 | -0.330024000 | -4.060776000 |
| 1 | -0.476898000 | -1.244801000 | -3.451331000 |
| 1 | -2.071208000 | -1.418413000 | -2.650111000 |
| 6 | 1.780781000  | -0.772549000 | 0.214253000  |
| 6 | 2.429549000  | -1.942779000 | -0.536670000 |
| 1 | 1.669751000  | -2.621274000 | -0.950883000 |
| 1 | 3.012417000  | -1.593337000 | -1.394468000 |
| 1 | 1.381633000  | -1.141160000 | 1.166158000  |
| 1 | 2.518413000  | -0.005486000 | 0.468114000  |
| 6 | 1.379630000  | 1.784823000  | -1.443877000 |
| 6 | 1.804848000  | 0.723187000  | -2.225286000 |
| 1 | 2.799243000  | 0.312106000  | -2.101128000 |
| 1 | 0.491512000  | 2.318977000  | -1.780664000 |
| 1 | 1.344539000  | 0.554150000  | -3.194907000 |
| 6 | 2.140319000  | 2.515809000  | -0.421282000 |
| 6 | 1.475896000  | 3.495999000  | 0.339833000  |
| 1 | 0.420653000  | 3.688191000  | 0.157031000  |
| 6 | 3.515645000  | 2.313710000  | -0.198255000 |
| 1 | 4.064544000  | 1.598055000  | -0.802506000 |
| 6 | 4.192279000  | 3.052650000  | 0.767958000  |
| 6 | 2.151615000  | 4.232994000  | 1.308792000  |
| 6 | 3.512522000  | 4.008982000  | 1.528461000  |
| 1 | 1.622706000  | 4.987503000  | 1.883536000  |
| 1 | 5.255574000  | 2.893087000  | 0.920372000  |
| 1 | 4.045650000  | 4.587456000  | 2.277131000  |
| 6 | 3.375876000  | -2.771004000 | 0.370994000  |
| 1 | 4.143970000  | -2.108854000 | 0.789827000  |
| 1 | 2.798313000  | -3.160238000 | 1.223218000  |
| 6 | 4.025763000  | -3.909177000 | -0.367692000 |
| 1 | 3.350082000  | -4.672851000 | -0.757217000 |
| 6 | 5.336226000  | -4.031462000 | -0.581404000 |
| 1 | 6.048038000  | -3.296983000 | -0.209529000 |
| 1 | 5.751172000  | -4.874877000 | -1.126049000 |

**47**  
E + ZPE = -2975.667073

|    |              |              |              |
|----|--------------|--------------|--------------|
| 28 | -0.248244000 | 0.297051000  | -0.979995000 |
| 15 | 1.432817000  | -0.884878000 | 0.254709000  |
| 6  | 1.047604000  | -1.808254000 | 1.859869000  |
| 1  | 1.900580000  | -1.646368000 | 2.525561000  |
| 6  | 1.062846000  | -3.296223000 | 1.451785000  |
| 1  | 1.163860000  | -3.927679000 | 2.341745000  |
| 1  | 0.107383000  | -3.561183000 | 0.980025000  |
| 6  | 2.212186000  | -3.500297000 | 0.466067000  |
| 1  | 2.212121000  | -4.506482000 | 0.030965000  |
| 1  | 3.174377000  | -3.373483000 | 0.980668000  |
| 6  | 2.083052000  | -2.438478000 | -0.646671000 |
| 1  | 1.254468000  | -2.736825000 | -1.304375000 |
| 6  | 3.352720000  | -2.297368000 | -1.490103000 |
| 1  | 4.185561000  | -1.894999000 | -0.905378000 |
| 1  | 3.211858000  | -1.662550000 | -2.370498000 |
| 1  | 3.650775000  | -3.286119000 | -1.857311000 |
| 6  | -0.222984000 | -1.386494000 | 2.600325000  |
| 1  | -1.118626000 | -1.576383000 | 2.000724000  |
| 1  | -0.207818000 | -0.328607000 | 2.879120000  |



|   |              |              |              |
|---|--------------|--------------|--------------|
| 1 | -0.314782000 | -1.969482000 | 3.523892000  |
| 6 | 2.892869000  | 0.213094000  | 0.562600000  |
| 6 | 3.628963000  | 0.192890000  | 1.754859000  |
| 1 | 3.376897000  | -0.499337000 | 2.549588000  |
| 6 | 4.710573000  | 1.053436000  | 1.959820000  |
| 1 | 5.261378000  | 1.008214000  | 2.894592000  |
| 6 | 5.079427000  | 1.956848000  | 0.968344000  |
| 1 | 5.920512000  | 2.627042000  | 1.116990000  |
| 6 | 4.355153000  | 1.994991000  | -0.223906000 |
| 1 | 4.642578000  | 2.696452000  | -1.003404000 |
| 6 | 3.267735000  | 1.143713000  | -0.441610000 |
| 6 | 2.530554000  | 1.243170000  | -1.757337000 |
| 1 | 2.409145000  | 0.269572000  | -2.238008000 |
| 1 | 3.078898000  | 1.883198000  | -2.457243000 |
| 8 | 1.184139000  | 1.761039000  | -1.630054000 |
| 6 | 1.137667000  | 3.186235000  | -1.445422000 |
| 1 | 1.683022000  | 3.679901000  | -2.257546000 |
| 1 | 0.089194000  | 3.477384000  | -1.485856000 |
| 1 | 1.571021000  | 3.471575000  | -0.480983000 |
| 6 | -1.174031000 | 1.161535000  | 0.444352000  |
| 6 | -2.168084000 | 2.267818000  | 0.157741000  |
| 1 | -1.768622000 | 3.008009000  | -0.546290000 |
| 1 | -3.083762000 | 1.866706000  | -0.284498000 |
| 1 | -0.310065000 | 1.551255000  | 1.003463000  |
| 1 | -1.643048000 | 0.354313000  | 1.011053000  |
| 6 | -1.656900000 | -0.871471000 | -1.760339000 |
| 6 | -1.612944000 | 0.399563000  | -2.376783000 |
| 1 | -2.426392000 | 1.105307000  | -2.256240000 |
| 1 | -1.010936000 | -1.644884000 | -2.192794000 |
| 1 | -1.055606000 | 0.520734000  | -3.307169000 |
| 6 | -2.779285000 | -1.449299000 | -0.993298000 |
| 6 | -2.631907000 | -2.733331000 | -0.437189000 |
| 1 | -1.702387000 | -3.276530000 | -0.593721000 |
| 6 | -4.009606000 | -0.791154000 | -0.823049000 |
| 1 | -4.179743000 | 0.173668000  | -1.289651000 |
| 6 | -5.040691000 | -1.384550000 | -0.097246000 |
| 6 | -3.662166000 | -3.329204000 | 0.286333000  |
| 6 | -4.870004000 | -2.651212000 | 0.466054000  |
| 1 | -3.528207000 | -4.324764000 | 0.699545000  |
| 1 | -5.986786000 | -0.862846000 | 0.014150000  |
| 1 | -5.678531000 | -3.114080000 | 1.023955000  |
| 6 | -2.558588000 | 3.003437000  | 1.471274000  |
| 1 | -2.962344000 | 2.278651000  | 2.188678000  |
| 1 | -1.649733000 | 3.428087000  | 1.922012000  |
| 6 | -3.565745000 | 4.093772000  | 1.222434000  |
| 1 | -3.233568000 | 4.913438000  | 0.583297000  |
| 6 | -4.804819000 | 4.110947000  | 1.714267000  |
| 1 | -5.176818000 | 3.316374000  | 2.358179000  |
| 1 | -5.491965000 | 4.925454000  | 1.503399000  |

**48**  
E + ZPE = -2975.667438

|    |              |              |              |
|----|--------------|--------------|--------------|
| 28 | -0.313569000 | 0.397615000  | -0.868054000 |
| 15 | 1.476860000  | -0.755532000 | 0.271320000  |
| 6  | 1.249376000  | -1.611303000 | 1.944591000  |
| 1  | 2.028918000  | -1.216260000 | 2.602748000  |
| 6  | 1.525718000  | -3.113219000 | 1.675438000  |
| 1  | 1.874259000  | -3.603336000 | 2.591357000  |
| 1  | 0.584207000  | -3.603475000 | 1.393726000  |
| 6  | 2.532039000  | -3.246642000 | 0.528635000  |
| 1  | 2.617696000  | -4.282561000 | 0.179336000  |
| 1  | 3.534033000  | -2.937635000 | 0.854498000  |

|   |              |              |              |
|---|--------------|--------------|--------------|
| 6 | 2.053037000  | -2.328685000 | -0.612010000 |
| 1 | 1.129954000  | -2.757956000 | -1.027418000 |
| 6 | 3.059498000  | -2.140339000 | -1.748679000 |
| 1 | 3.980407000  | -1.664459000 | -1.397573000 |
| 1 | 2.653689000  | -1.535836000 | -2.568546000 |
| 1 | 3.326966000  | -3.115474000 | -2.170818000 |
| 6 | -0.104226000 | -1.365926000 | 2.618434000  |
| 1 | -0.934161000 | -1.711965000 | 1.993386000  |
| 1 | -0.262740000 | -0.308522000 | 2.850644000  |
| 1 | -0.147362000 | -1.921019000 | 3.562598000  |
| 6 | 3.001830000  | 0.289522000  | 0.404660000  |
| 6 | 3.985138000  | 0.063857000  | 1.379460000  |
| 1 | 3.870710000  | -0.737483000 | -2.100845000 |
| 6 | 5.140024000  | 0.846361000  | 1.447764000  |
| 1 | 5.882220000  | 0.642687000  | 2.213859000  |
| 6 | 5.335387000  | 1.877322000  | 0.533585000  |
| 1 | 6.228948000  | 2.492379000  | 0.577819000  |
| 6 | 4.369718000  | 2.115363000  | -0.444560000 |
| 1 | 4.522159000  | 2.917927000  | -1.162027000 |
| 6 | 3.208878000  | 1.339083000  | -0.526121000 |
| 6 | 2.220946000  | 1.652582000  | -1.627665000 |
| 1 | 2.002976000  | 0.775610000  | -2.247939000 |
| 1 | 2.625670000  | 2.421701000  | -2.295242000 |
| 8 | 0.932836000  | 2.100766000  | -1.150255000 |
| 6 | 0.969997000  | 3.391762000  | -0.519728000 |
| 1 | 1.386094000  | 4.127323000  | -1.217005000 |
| 1 | -0.058714000 | 3.658701000  | -0.283973000 |
| 1 | 1.571668000  | 3.365955000  | 0.394508000  |
| 6 | -1.441991000 | 1.128247000  | 0.479441000  |
| 6 | -2.487154000 | 2.173008000  | 0.151404000  |
| 1 | -2.087861000 | 2.954887000  | -0.507433000 |
| 1 | -3.337287000 | 1.725270000  | -0.370467000 |
| 1 | -0.657129000 | 1.545811000  | 1.127296000  |
| 1 | -1.890351000 | 0.253866000  | 0.959136000  |
| 6 | -1.523838000 | -0.914349000 | -1.749794000 |
| 6 | -1.601156000 | 0.373493000  | -2.329347000 |
| 1 | -2.496464000 | 0.976923000  | -2.240132000 |
| 1 | -0.786294000 | -1.600353000 | -2.179199000 |
| 1 | -1.013857000 | 0.589587000  | -3.224520000 |
| 6 | -2.605579000 | -1.627198000 | -1.036437000 |
| 6 | -2.339267000 | -2.891807000 | -0.480234000 |
| 1 | -1.347917000 | -3.325802000 | -0.593604000 |
| 6 | -3.907198000 | -1.110974000 | -0.915508000 |
| 1 | -4.161735000 | -0.163686000 | -1.379800000 |
| 6 | -4.897443000 | -1.824023000 | -0.242289000 |
| 6 | -3.328051000 | -3.606262000 | 0.192341000  |
| 6 | -4.611624000 | -3.070370000 | 0.319326000  |
| 1 | -3.101764000 | -4.584440000 | 0.606864000  |
| 1 | -5.899734000 | -1.411803000 | -0.170234000 |
| 1 | -5.387275000 | -3.627119000 | 0.836620000  |
| 6 | -3.024217000 | 2.841787000  | 1.448235000  |
| 1 | -3.430025000 | 2.070848000  | 2.114473000  |
| 1 | -2.182913000 | 3.311146000  | 1.979508000  |
| 6 | -4.081764000 | 3.870342000  | 1.149849000  |
| 1 | -3.760037000 | 4.727167000  | 0.555704000  |
| 6 | -5.351749000 | 3.792149000  | 1.547712000  |
| 1 | -5.715438000 | 2.957331000  | 2.143634000  |
| 1 | -6.075157000 | 4.565029000  | 1.304094000  |

**49**  
E + ZPE = -2975.663274

|    |              |             |              |
|----|--------------|-------------|--------------|
| 28 | -0.279007000 | 0.305759000 | -0.677839000 |
|----|--------------|-------------|--------------|

|    |              |              |              |
|----|--------------|--------------|--------------|
| 15 | 1.349589000  | -0.808401000 | 0.317014000  |
| 6  | 1.245636000  | -1.803262000 | 1.929085000  |
| 1  | 1.977934000  | -1.362446000 | 2.609792000  |
| 6  | 1.692082000  | -3.244462000 | 1.554141000  |
| 1  | 2.206870000  | -3.710268000 | 2.401293000  |
| 1  | 0.796022000  | -3.848029000 | 1.359034000  |
| 6  | 2.558421000  | -3.216444000 | 0.292738000  |
| 1  | 2.700014000  | -4.220722000 | -0.123770000 |
| 1  | 3.557134000  | -2.815092000 | 0.507454000  |
| 6  | 1.839892000  | -2.312041000 | -0.723110000 |
| 1  | 0.881767000  | -2.788590000 | -0.974064000 |
| 6  | 2.619293000  | -2.059524000 | -2.014350000 |
| 1  | 3.539606000  | -1.495166000 | -1.832797000 |
| 1  | 2.024097000  | -1.523436000 | -2.761975000 |
| 1  | 2.902546000  | -3.018490000 | -2.462276000 |
| 6  | -0.106876000 | -1.797971000 | 2.650611000  |
| 1  | -0.932218000 | -2.076106000 | 1.986658000  |
| 1  | -0.331394000 | -0.828871000 | 3.102112000  |
| 1  | -0.073761000 | -2.534674000 | 3.461684000  |
| 6  | 2.899581000  | 0.207485000  | 0.400880000  |
| 6  | 3.866967000  | -0.009796000 | 1.394336000  |
| 1  | 3.717519000  | -0.766392000 | 2.154978000  |
| 6  | 5.056510000  | 0.720779000  | 1.432301000  |
| 1  | 5.782722000  | 0.521823000  | 2.214654000  |
| 6  | 5.305020000  | 1.691075000  | 0.467461000  |
| 1  | 6.226290000  | 2.265219000  | 0.484944000  |
| 6  | 4.354584000  | 1.922053000  | -0.527003000 |
| 1  | 4.546716000  | 2.679560000  | -1.282721000 |
| 6  | 3.156707000  | 1.201389000  | -0.579935000 |
| 6  | 2.187159000  | 1.530812000  | -1.696479000 |
| 1  | 1.898682000  | 0.642544000  | -2.266447000 |
| 1  | 2.657094000  | 2.225978000  | -2.402819000 |
| 8  | 0.947879000  | 2.100176000  | -1.243210000 |
| 6  | 1.097778000  | 3.417471000  | -0.695083000 |
| 1  | 1.561146000  | 4.076446000  | -1.439071000 |
| 1  | 0.097868000  | 3.783603000  | -0.465364000 |
| 1  | 1.707361000  | 3.405795000  | 0.214830000  |
| 6  | -0.927938000 | 1.014527000  | 0.958231000  |
| 6  | -2.012992000 | 1.953204000  | 0.461477000  |
| 1  | -1.651142000 | 2.609335000  | -0.340794000 |
| 1  | -2.853765000 | 1.383261000  | 0.055554000  |
| 1  | -0.137381000 | 1.543127000  | 1.503149000  |
| 1  | -1.345977000 | 0.229188000  | 1.587140000  |
| 6  | -1.554970000 | -0.953898000 | -1.757708000 |
| 6  | -1.365792000 | 0.246949000  | -2.430095000 |
| 1  | -2.130393000 | 1.017795000  | -2.458055000 |
| 1  | -0.878853000 | -1.771894000 | -2.012392000 |
| 1  | -0.618401000 | 0.315039000  | -3.219010000 |
| 6  | -2.784486000 | -1.403556000 | -1.068832000 |
| 6  | -2.758746000 | -2.601991000 | -0.333340000 |
| 1  | -1.835917000 | -3.176495000 | -0.282447000 |
| 6  | -3.999990000 | -0.703095000 | -1.156674000 |
| 1  | -4.066604000 | 0.196635000  | -1.761015000 |
| 6  | -5.141285000 | -1.174645000 | -0.510465000 |
| 6  | -3.899106000 | -3.074848000 | 0.312277000  |
| 6  | -5.094798000 | -2.357666000 | 0.230598000  |
| 1  | -3.858558000 | -4.006529000 | 0.869185000  |
| 1  | -6.073445000 | -0.624394000 | -0.599423000 |
| 1  | -5.987702000 | -2.726430000 | 0.726524000  |
| 6  | -2.553549000 | 2.853989000  | 1.612550000  |
| 1  | -2.934677000 | 2.218552000  | 2.420452000  |
| 1  | -1.715868000 | 3.432604000  | 2.027511000  |
| 6  | -3.635183000 | 3.783053000  | 1.133411000  |
| 1  | -3.335270000 | 4.521125000  | 0.387514000  |

|   |              |             |             |
|---|--------------|-------------|-------------|
| 6 | -4.901847000 | 3.753634000 | 1.548810000 |
| 1 | -5.244427000 | 3.037377000 | 2.292938000 |
| 1 | -5.642750000 | 4.453049000 | 1.172006000 |

**50**

E + ZPE = -2975.674495

|    |              |              |              |
|----|--------------|--------------|--------------|
| 28 | -0.413856000 | -0.306619000 | 0.196617000  |
| 15 | 1.366744000  | 0.886088000  | -0.148272000 |
| 6  | 1.307442000  | 2.013830000  | -1.645822000 |
| 1  | 1.653668000  | 1.445828000  | -2.514302000 |
| 6  | 2.255798000  | 3.216820000  | -1.331450000 |
| 1  | 3.072879000  | 3.269060000  | -2.057880000 |
| 1  | 1.684542000  | 4.144321000  | -1.446218000 |
| 6  | 2.813909000  | 3.122191000  | 0.106323000  |
| 1  | 2.970317000  | 4.117155000  | 0.538202000  |
| 1  | 3.790045000  | 2.623386000  | 0.107738000  |
| 6  | 1.844433000  | 2.309004000  | 0.987029000  |
| 1  | 0.915667000  | 2.884324000  | 1.112309000  |
| 6  | 2.419039000  | 1.982735000  | 2.366047000  |
| 1  | 3.312160000  | 1.353778000  | 2.289237000  |
| 1  | 1.695131000  | 1.484330000  | 3.018659000  |
| 1  | 2.714967000  | 2.910869000  | 2.867619000  |
| 6  | -0.122820000 | 2.499545000  | -1.935059000 |
| 1  | -0.525065000 | 3.076098000  | -1.094098000 |
| 1  | -0.813187000 | 1.678464000  | -2.146898000 |
| 1  | -0.111389000 | 3.163656000  | -2.806411000 |
| 6  | 2.897946000  | -0.141297000 | -0.306296000 |
| 6  | 3.807060000  | 0.110728000  | -1.345889000 |
| 1  | 3.618423000  | 0.901254000  | -2.062658000 |
| 6  | 4.979383000  | -0.634749000 | -1.487247000 |
| 1  | 5.662765000  | -0.411770000 | -2.301120000 |
| 6  | 5.265731000  | -1.651247000 | -0.582025000 |
| 1  | 6.176390000  | -2.234889000 | -0.676891000 |
| 6  | 4.368995000  | -1.916461000 | 0.453373000  |
| 1  | 4.593151000  | -2.708472000 | 1.163645000  |
| 6  | 3.185012000  | -1.186796000 | 0.608410000  |
| 6  | 2.253702000  | -1.572534000 | 1.742723000  |
| 1  | 1.893380000  | -0.694886000 | 2.281971000  |
| 1  | 2.793646000  | -2.200289000 | 2.464401000  |
| 8  | 1.072694000  | -2.255094000 | 1.308956000  |
| 6  | 1.304417000  | -3.613501000 | 0.940995000  |
| 1  | 1.764299000  | -4.165951000 | 1.771528000  |
| 1  | 0.329745000  | -4.054334000 | 0.723335000  |
| 1  | 1.948912000  | -3.694773000 | 0.056513000  |
| 6  | -1.627936000 | 0.919681000  | 1.438826000  |
| 6  | -1.024915000 | -0.087668000 | 2.163119000  |
| 1  | -1.566947000 | -0.982301000 | 2.457588000  |
| 1  | -1.727793000 | -1.439318000 | -0.045939000 |
| 1  | -1.117784000 | 1.879665000  | 1.385104000  |
| 6  | -0.107101000 | -1.149831000 | -1.479664000 |
| 6  | -1.330160000 | -1.887741000 | -1.035649000 |
| 1  | -0.240523000 | -0.541120000 | -2.376031000 |
| 1  | 0.805827000  | -1.741260000 | -1.532644000 |
| 1  | -1.092588000 | -2.910550000 | -0.729116000 |
| 1  | -0.129419000 | 0.116329000  | 2.739912000  |
| 6  | -3.035688000 | 0.966668000  | 0.996228000  |
| 6  | -4.011404000 | 0.086562000  | 1.499593000  |
| 1  | -3.736562000 | -0.676493000 | 2.221513000  |
| 6  | -3.438814000 | 1.974026000  | 0.099916000  |
| 1  | -2.701651000 | 2.676654000  | -0.279452000 |
| 6  | -4.770791000 | 2.095909000  | -0.288628000 |
| 6  | -5.344004000 | 0.214953000  | 1.118512000  |

|   |              |              |              |
|---|--------------|--------------|--------------|
| 6 | -5.728303000 | 1.216833000  | 0.222378000  |
| 1 | -6.087776000 | -0.459953000 | 1.531348000  |
| 1 | -5.064246000 | 2.884069000  | -0.975731000 |
| 1 | -6.770824000 | 1.320266000  | -0.064099000 |
| 6 | -2.530891000 | -1.863256000 | -2.004241000 |
| 1 | -2.154210000 | -2.208864000 | -2.977185000 |
| 1 | -2.876835000 | -0.832360000 | -2.144732000 |
| 6 | -3.667628000 | -2.748519000 | -1.571589000 |
| 1 | -3.411951000 | -3.796312000 | -1.404150000 |
| 6 | -4.931429000 | -2.353787000 | -1.418316000 |
| 1 | -5.233772000 | -1.323075000 | -1.586572000 |
| 1 | -5.714037000 | -3.050351000 | -1.130917000 |

**51R**

E + ZPE = -2780.505922

|    |              |              |              |
|----|--------------|--------------|--------------|
| 28 | -1.075713000 | -0.151504000 | 0.147004000  |
| 15 | 1.031581000  | -0.678798000 | -0.007654000 |
| 6  | 1.753071000  | -1.695202000 | 1.410721000  |
| 1  | 2.682366000  | -1.186733000 | 1.692651000  |
| 6  | 2.111194000  | -3.056024000 | 0.768609000  |
| 1  | 2.864561000  | -3.573069000 | 1.373512000  |
| 1  | 1.222548000  | -3.700612000 | 0.753954000  |
| 6  | 2.594829000  | -2.812308000 | -0.668281000 |
| 1  | 2.685120000  | -3.749233000 | -1.229866000 |
| 1  | 3.592451000  | -2.354094000 | -0.663224000 |
| 6  | 1.581020000  | -1.870897000 | -1.354382000 |
| 1  | 0.675426000  | -2.454174000 | -1.560709000 |
| 6  | 2.050031000  | -1.231217000 | -2.662657000 |
| 1  | 2.943079000  | -0.615549000 | -2.519231000 |
| 1  | 1.272162000  | -0.599682000 | -3.106712000 |
| 1  | 2.295289000  | -2.012558000 | -3.390432000 |
| 6  | 0.864266000  | -1.797893000 | 2.653507000  |
| 1  | -0.101856000 | -2.258233000 | 2.421979000  |
| 1  | 0.677285000  | -0.815983000 | 3.102523000  |
| 1  | 1.353071000  | -2.416944000 | 3.414475000  |
| 6  | 2.098644000  | 0.827010000  | -0.110598000 |
| 6  | 3.496467000  | 0.705175000  | -0.034465000 |
| 1  | 3.950569000  | -0.274022000 | 0.077093000  |
| 6  | 4.332485000  | 1.819069000  | -0.104432000 |
| 1  | 5.409275000  | 1.690027000  | -0.050588000 |
| 6  | 3.778866000  | 3.090672000  | -0.236517000 |
| 1  | 4.417379000  | 3.967561000  | -0.282311000 |
| 6  | 2.393751000  | 3.232390000  | -0.297355000 |
| 1  | 1.962194000  | 4.225945000  | -0.389349000 |
| 6  | 1.543706000  | 2.120859000  | -0.247337000 |
| 6  | 0.058375000  | 2.373999000  | -0.377129000 |
| 1  | -0.342943000 | 2.002437000  | -1.324568000 |
| 1  | -0.146503000 | 3.448715000  | -0.329716000 |
| 8  | -0.753504000 | 1.728035000  | 0.633677000  |
| 6  | -0.537842000 | 2.208510000  | 1.973709000  |
| 1  | -0.658729000 | 3.296184000  | 1.988514000  |
| 1  | -1.302481000 | 1.745337000  | 2.597207000  |
| 1  | 0.460761000  | 1.938289000  | 2.330518000  |
| 1  | -2.322034000 | -2.817339000 | 1.256591000  |
| 6  | -1.973549000 | -2.996804000 | 0.234642000  |
| 6  | -1.861177000 | -1.726731000 | -0.592391000 |
| 1  | -2.687102000 | -3.687440000 | -0.233988000 |
| 1  | -1.013913000 | -3.519961000 | 0.299924000  |
| 1  | -1.536313000 | -1.939478000 | -1.615039000 |
| 6  | -2.908441000 | -0.708784000 | -0.535564000 |
| 6  | -3.178137000 | -0.160210000 | 0.752611000  |
| 6  | -3.406512000 | -0.015651000 | -1.676743000 |

|   |              |              |              |
|---|--------------|--------------|--------------|
| 1 | -2.970198000 | -0.746076000 | 1.646499000  |
| 1 | -3.185193000 | -0.407847000 | -2.665913000 |
| 6 | -4.007106000 | 0.976739000  | 0.880676000  |
| 6 | -4.199288000 | 1.106534000  | -1.528938000 |
| 1 | -4.265055000 | 1.342882000  | 1.870275000  |
| 1 | -4.602972000 | 1.601128000  | -2.407811000 |
| 6 | -4.503052000 | 1.609092000  | -0.244594000 |
| 1 | -5.143584000 | 2.480360000  | -0.145517000 |

**51S**

E + ZPE = -2780.505789

|    |              |              |              |
|----|--------------|--------------|--------------|
| 28 | 1.029671000  | -0.113681000 | -0.411349000 |
| 15 | -0.930824000 | 0.719039000  | 0.056404000  |
| 6  | -1.039637000 | 1.580253000  | 1.734940000  |
| 1  | -1.959569000 | 1.205569000  | 2.197907000  |
| 6  | -1.241217000 | 3.070064000  | 1.380621000  |
| 1  | -1.650314000 | 3.613399000  | 2.239865000  |
| 1  | -0.269851000 | 3.528159000  | 1.148684000  |
| 6  | -2.158988000 | 3.152166000  | 0.153610000  |
| 1  | -2.215945000 | 4.170993000  | -0.246360000 |
| 1  | -3.182888000 | 2.863270000  | 0.425025000  |
| 6  | -1.598707000 | 2.187800000  | -0.914424000 |
| 1  | -0.696610000 | 2.651812000  | -1.328912000 |
| 6  | -2.546667000 | 1.857466000  | -2.068982000 |
| 1  | -3.460596000 | 1.368444000  | -1.718898000 |
| 1  | -2.075401000 | 1.201193000  | -2.809451000 |
| 1  | -2.836588000 | 2.779951000  | -2.584182000 |
| 6  | 0.125011000  | 1.305074000  | 2.688481000  |
| 1  | 1.082525000  | 1.618135000  | 2.260141000  |
| 1  | 0.199863000  | 0.242286000  | 2.944025000  |
| 1  | -0.018994000 | 1.857433000  | 3.624201000  |
| 6  | -2.247922000 | -0.576018000 | 0.096954000  |
| 6  | -3.513827000 | -0.281961000 | 0.630736000  |
| 1  | -3.724974000 | 0.710508000  | 1.015685000  |
| 6  | -4.528394000 | -1.238081000 | 0.672974000  |
| 1  | -5.498902000 | -0.977025000 | 1.084070000  |
| 6  | -4.287707000 | -2.523248000 | 0.192100000  |
| 1  | -5.065807000 | -3.279532000 | 0.228213000  |
| 6  | -3.033970000 | -2.836422000 | -0.330374000 |
| 1  | -2.844388000 | -3.840998000 | -0.700195000 |
| 6  | -2.013844000 | -1.880041000 | -0.396638000 |
| 6  | -0.709099000 | -2.289725000 | -1.040391000 |
| 1  | -0.539413000 | -1.770649000 | -1.988683000 |
| 1  | -0.708253000 | -3.365346000 | -1.245808000 |
| 8  | 0.470058000  | -1.992803000 | -0.252999000 |
| 6  | 0.584625000  | -2.747134000 | 0.970092000  |
| 1  | 0.498283000  | -3.814169000 | 0.741740000  |
| 1  | 1.575611000  | -2.535826000 | 1.371859000  |
| 1  | -0.192150000 | -2.453491000 | 1.682816000  |
| 1  | 2.117271000  | 1.044030000  | -3.002887000 |
| 6  | 1.847613000  | 1.877699000  | -2.347998000 |
| 6  | 1.913360000  | 1.523364000  | -0.868503000 |
| 1  | 0.851405000  | 2.217784000  | -2.648073000 |
| 1  | 2.547596000  | 2.695953000  | -2.562088000 |
| 1  | 1.744066000  | 2.393021000  | -0.229043000 |
| 6  | 2.948004000  | 0.630976000  | -0.367443000 |
| 6  | 3.026785000  | -0.649878000 | -0.992430000 |
| 6  | 3.633220000  | 0.818487000  | 0.869813000  |
| 1  | 2.719087000  | -0.777166000 | -2.029170000 |
| 1  | 3.571726000  | 1.786196000  | 1.360140000  |
| 6  | 3.832602000  | -1.666808000 | -0.422254000 |
| 6  | 4.403791000  | -0.190397000 | 1.408265000  |

|   |             |              |              |
|---|-------------|--------------|--------------|
| 1 | 3.937162000 | -2.615336000 | -0.940934000 |
| 1 | 4.951953000 | -0.016460000 | 2.329869000  |
| 6 | 4.502565000 | -1.446842000 | 0.764686000  |
| 1 | 5.129637000 | -2.223005000 | 1.193122000  |

**52**

E + ZPE = -2975.668509

|    |              |              |              |
|----|--------------|--------------|--------------|
| 28 | -0.960822000 | -0.997322000 | -0.117050000 |
| 15 | 0.775045000  | -0.185209000 | 0.992785000  |
| 6  | 0.348189000  | 1.294857000  | 2.065082000  |
| 1  | 0.397685000  | 2.197536000  | 1.451218000  |
| 6  | 1.393344000  | 1.321092000  | 3.226349000  |
| 1  | 1.991196000  | 2.237247000  | 3.190669000  |
| 1  | 0.849688000  | 1.345769000  | 4.176959000  |
| 6  | 2.305774000  | 0.076475000  | 3.175997000  |
| 1  | 2.601873000  | -0.241969000 | 4.181951000  |
| 1  | 3.231144000  | 0.301118000  | 2.633396000  |
| 6  | 1.574319000  | -1.073677000 | 2.455538000  |
| 1  | 0.728913000  | -1.392971000 | 3.078976000  |
| 6  | 2.483473000  | -2.275746000 | 2.197312000  |
| 1  | 3.313080000  | -2.017809000 | 1.531174000  |
| 1  | 1.950620000  | -3.132214000 | 1.772942000  |
| 1  | 2.918436000  | -2.608991000 | 3.146323000  |
| 6  | -1.087888000 | 1.175983000  | 2.608646000  |
| 1  | -1.226627000 | 0.260235000  | 3.195593000  |
| 1  | -1.834532000 | 1.199493000  | 1.810652000  |
| 1  | -1.290811000 | 2.021226000  | 3.275677000  |
| 6  | 2.223933000  | 0.268912000  | -0.065255000 |
| 6  | 2.819849000  | 1.532875000  | 0.067291000  |
| 1  | 2.420748000  | 2.253893000  | 0.771474000  |
| 6  | 3.937565000  | 1.893516000  | -0.688094000 |
| 1  | 4.378196000  | 2.877984000  | -0.561434000 |
| 6  | 4.487651000  | 0.983476000  | -1.586004000 |
| 1  | 5.365261000  | 1.245987000  | -2.169041000 |
| 6  | 3.906603000  | -0.276964000 | -1.725602000 |
| 1  | 4.347627000  | -0.993680000 | -2.413903000 |
| 6  | 2.773441000  | -0.652602000 | -0.992963000 |
| 6  | 2.175047000  | -2.024638000 | -1.255489000 |
| 1  | 1.734912000  | -2.447721000 | -0.351313000 |
| 1  | 2.963728000  | -2.713779000 | -1.589557000 |
| 8  | 1.111194000  | -2.014193000 | -2.209685000 |
| 6  | 1.542975000  | -1.942433000 | -3.565106000 |
| 1  | 2.224976000  | -2.770630000 | -3.803892000 |
| 1  | 0.648839000  | -2.031410000 | -4.186440000 |
| 1  | 2.041779000  | -0.990700000 | -3.789195000 |
| 6  | -3.582970000 | -2.310372000 | 0.817470000  |
| 1  | -3.581628000 | -1.511014000 | 1.568373000  |
| 6  | -4.516634000 | -1.967793000 | -0.314907000 |
| 6  | -5.322172000 | -0.904473000 | -0.340133000 |
| 1  | -5.349300000 | -0.187175000 | 0.478277000  |
| 6  | -1.090512000 | -2.513396000 | 1.269488000  |
| 6  | -2.160630000 | -2.658815000 | 0.412886000  |
| 1  | -2.061286000 | -3.365238000 | -0.413171000 |
| 1  | -2.081436000 | -1.336968000 | -1.292066000 |
| 1  | -4.546504000 | -2.680325000 | -1.141118000 |
| 1  | -6.007867000 | -0.727157000 | -1.163725000 |
| 1  | -3.970547000 | -3.208295000 | 1.327538000  |
| 1  | -1.253455000 | -2.111705000 | 2.266602000  |
| 1  | -0.207704000 | -3.135525000 | 1.152435000  |
| 6  | -0.791593000 | 0.471035000  | -1.382568000 |
| 6  | -1.720017000 | -0.498572000 | -2.018319000 |
| 1  | 0.201070000  | 0.462337000  | -1.824686000 |

|   |              |              |              |
|---|--------------|--------------|--------------|
| 1 | -1.266951000 | -1.065300000 | -2.830718000 |
| 1 | -2.685546000 | -0.077035000 | -2.299429000 |
| 6 | -1.275936000 | 1.833774000  | -1.060396000 |
| 6 | -2.598496000 | 2.091019000  | -0.649416000 |
| 1 | -3.310203000 | 1.272869000  | -0.560807000 |
| 6 | -0.395092000 | 2.924759000  | -1.178067000 |
| 1 | 0.623162000  | 2.749971000  | -1.515306000 |
| 6 | -0.817843000 | 4.223715000  | -0.898982000 |
| 6 | -3.020139000 | 3.388770000  | -0.368095000 |
| 6 | -2.131411000 | 4.460454000  | -0.488713000 |
| 1 | -4.046470000 | 3.566463000  | -0.059632000 |
| 1 | -0.125111000 | 5.052732000  | -1.013301000 |
| 1 | -2.464126000 | 5.472069000  | -0.276086000 |

**53**

E + ZPE = -2975.664586

|    |              |              |              |
|----|--------------|--------------|--------------|
| 28 | 0.888806000  | 0.258850000  | 0.035489000  |
| 15 | -0.957875000 | -0.666541000 | 0.741043000  |
| 6  | -0.890730000 | -2.510229000 | 1.071780000  |
| 1  | -0.935123000 | -3.058248000 | 0.125905000  |
| 6  | -2.117860000 | -2.824969000 | 1.977304000  |
| 1  | -2.925100000 | -3.277992000 | 1.395036000  |
| 1  | -1.819419000 | -3.569544000 | 2.722453000  |
| 6  | -2.624523000 | -1.529719000 | 2.665869000  |
| 1  | -2.818391000 | -1.691568000 | 3.732001000  |
| 1  | -3.574055000 | -1.211707000 | 2.220486000  |
| 6  | -1.598071000 | -0.388245000 | 2.496871000  |
| 1  | -0.719211000 | -0.615139000 | 3.114579000  |
| 6  | -2.149698000 | 0.966832000  | 2.935273000  |
| 1  | -3.032248000 | 1.253415000  | 2.354702000  |
| 1  | -1.407286000 | 1.768836000  | 2.868681000  |
| 1  | -2.459729000 | 0.902554000  | 3.984579000  |
| 6  | 0.429773000  | -2.879848000 | -1.776723000 |
| 1  | 0.534303000  | -2.376041000 | 2.743546000  |
| 1  | 1.308154000  | -2.645665000 | 1.172063000  |
| 1  | 0.438471000  | -3.957629000 | 1.974426000  |
| 6  | -2.394906000 | -0.365940000 | -0.389332000 |
| 6  | -3.050422000 | -1.463540000 | -0.972658000 |
| 1  | -2.720355000 | -2.474102000 | -0.763412000 |
| 6  | -4.145229000 | -1.295307000 | -1.821181000 |
| 1  | -4.629948000 | -2.165743000 | -2.253190000 |
| 6  | -4.619563000 | -0.015003000 | -2.090231000 |
| 1  | -5.484611000 | 0.130145000  | -2.730285000 |
| 6  | -3.975323000 | 1.084300000  | -1.524215000 |
| 1  | -4.354637000 | 2.083474000  | -1.722351000 |
| 6  | -2.852884000 | 0.941657000  | -0.697573000 |
| 6  | -2.170636000 | 2.210020000  | -0.212647000 |
| 1  | -1.651162000 | 2.049327000  | 0.730796000  |
| 1  | -2.923906000 | 2.993639000  | -0.043877000 |
| 8  | -1.162885000 | 2.694965000  | -1.098358000 |
| 6  | -1.650742000 | 3.424301000  | -2.218361000 |
| 1  | -2.297852000 | 4.253049000  | -1.896861000 |
| 1  | -0.776822000 | 3.834310000  | -2.729493000 |
| 1  | -2.207829000 | 2.787218000  | -2.918050000 |
| 6  | 2.785982000  | 2.655342000  | 0.428776000  |
| 1  | 2.492186000  | 3.108491000  | -0.524860000 |
| 6  | 3.286311000  | 3.741130000  | 1.356038000  |
| 6  | 3.237463000  | 5.044901000  | 1.083843000  |
| 1  | 2.832050000  | 5.421879000  | 0.147035000  |
| 6  | 1.759853000  | 0.779986000  | 1.825258000  |
| 6  | 1.618016000  | 1.931958000  | 1.080801000  |
| 1  | 0.739696000  | 2.556431000  | 1.243351000  |

|   |              |              |              |
|---|--------------|--------------|--------------|
| 1 | 1.272889000  | 1.413205000  | -1.468350000 |
| 1 | 3.696312000  | 3.397658000  | 2.305555000  |
| 1 | 3.611904000  | 5.786424000  | 1.783539000  |
| 1 | 3.596385000  | 1.941448000  | 0.226033000  |
| 1 | 2.722450000  | 0.271179000  | 1.872711000  |
| 1 | 1.066179000  | 0.534479000  | 2.622017000  |
| 6 | 0.844148000  | -0.737655000 | -1.589812000 |
| 6 | 0.962405000  | 0.631881000  | -2.214357000 |
| 1 | -0.024296000 | -1.309791000 | -1.907848000 |
| 1 | 0.012903000  | 0.977771000  | -2.616142000 |
| 1 | 1.747544000  | 0.677757000  | -2.977491000 |
| 6 | 2.073759000  | -1.523892000 | -1.406158000 |
| 6 | 3.329573000  | -0.893266000 | -1.254170000 |
| 1 | 3.426677000  | 0.179801000  | -1.392604000 |
| 6 | 2.027386000  | -2.933976000 | -1.337405000 |
| 1 | 1.076254000  | -3.439456000 | -1.485320000 |
| 6 | 3.178212000  | -3.677387000 | -1.112939000 |
| 6 | 4.481478000  | -1.643332000 | -1.006675000 |
| 6 | 4.409819000  | -3.033281000 | -0.932441000 |
| 1 | 5.438242000  | -1.140530000 | -0.899937000 |
| 1 | 3.124070000  | -4.761749000 | -1.084064000 |
| 1 | 5.308414000  | -3.617332000 | -0.758097000 |

54  
E + ZPE = -2975.686751

|    |              |              |              |
|----|--------------|--------------|--------------|
| 28 | 1.023987000  | -0.401562000 | 0.007959000  |
| 15 | -1.072253000 | -0.761606000 | 0.628869000  |
| 6  | -1.439923000 | -2.594325000 | 0.841677000  |
| 1  | -1.757336000 | -2.998379000 | -0.124437000 |
| 6  | -2.571104000 | -2.710440000 | 1.911077000  |
| 1  | -3.472534000 | -3.156098000 | 1.478938000  |
| 1  | -2.234524000 | -3.397794000 | 2.694402000  |
| 6  | -2.891418000 | -1.330923000 | 2.523480000  |
| 1  | -3.172502000 | -1.418857000 | 3.579034000  |
| 1  | -3.745921000 | -0.875047000 | 2.009933000  |
| 6  | -1.680201000 | -0.386237000 | 2.379192000  |
| 1  | -0.864167000 | -0.740221000 | 3.026113000  |
| 6  | -2.043181000 | 1.050912000  | 2.764134000  |
| 1  | -2.809538000 | 1.460229000  | 2.097521000  |
| 1  | -1.188316000 | 1.733539000  | 2.768991000  |
| 1  | -2.457858000 | 1.054887000  | 3.778589000  |
| 6  | -0.187032000 | -3.369213000 | 1.288217000  |
| 1  | 0.196299000  | -3.000568000 | 2.246685000  |
| 1  | 0.624864000  | -3.320783000 | 0.558062000  |
| 1  | -0.445986000 | -4.424480000 | 1.429663000  |
| 6  | -2.390768000 | -0.067832000 | -0.469692000 |
| 6  | -3.424094000 | -0.897391000 | -0.934490000 |
| 1  | -3.448725000 | -1.947141000 | -0.666723000 |
| 6  | -4.449681000 | -0.402774000 | -1.742171000 |
| 1  | -5.233716000 | -1.071294000 | -2.085058000 |
| 6  | -4.467889000 | 0.944741000  | -2.088751000 |
| 1  | -5.267185000 | 1.345508000  | -2.704784000 |
| 6  | -3.450652000 | 1.781391000  | -1.629925000 |
| 1  | -3.473098000 | 2.837788000  | -1.885596000 |
| 6  | -2.399740000 | 1.301573000  | -0.838499000 |
| 6  | -1.311853000 | 2.282004000  | -0.436760000 |
| 1  | -0.912406000 | 2.054441000  | 0.552171000  |
| 1  | -1.732696000 | 3.296943000  | -0.394549000 |
| 8  | -0.174304000 | 2.273600000  | -1.302997000 |
| 6  | -0.369886000 | 2.972650000  | -2.528836000 |
| 1  | -0.675914000 | 4.011774000  | -2.342155000 |
| 1  | 0.591319000  | 2.974892000  | -3.047716000 |

|   |              |              |              |
|---|--------------|--------------|--------------|
| 1 | -1.119736000 | 2.485750000  | -3.164668000 |
| 6 | 2.245242000  | 2.224870000  | 1.124327000  |
| 1 | 1.644147000  | 2.710805000  | 0.346648000  |
| 6 | 2.418152000  | 3.166307000  | 2.295372000  |
| 6 | 1.836148000  | 4.361719000  | 2.396073000  |
| 1 | 1.192046000  | 4.755016000  | 1.611910000  |
| 6 | 2.188187000  | -0.272598000 | 1.718702000  |
| 6 | 1.575932000  | 0.949794000  | 1.595031000  |
| 1 | 0.655344000  | 1.112972000  | 2.147596000  |
| 1 | 0.459554000  | 0.291956000  | -3.042274000 |
| 1 | 3.061130000  | 2.808665000  | 3.099664000  |
| 1 | 1.995923000  | 5.002093000  | 3.258742000  |
| 1 | 3.222711000  | 1.984794000  | 0.689548000  |
| 1 | 3.226299000  | -0.410790000 | 1.426484000  |
| 1 | 1.774044000  | -1.037608000 | 2.372321000  |
| 6 | 0.705102000  | -1.390554000 | -1.665060000 |
| 6 | 0.056539000  | -0.704356000 | -2.854557000 |
| 1 | 0.309929000  | -2.398417000 | -1.519376000 |
| 1 | -1.023492000 | -0.607776000 | -2.723031000 |
| 1 | 0.228896000  | -1.310641000 | -3.754130000 |
| 6 | 2.145735000  | -1.314601000 | -1.475321000 |
| 6 | 2.734085000  | -0.019366000 | -1.433963000 |
| 1 | 2.180765000  | 0.841854000  | -1.800468000 |
| 6 | 2.959929000  | -2.431450000 | -1.119629000 |
| 1 | 2.519252000  | -3.424664000 | -1.125470000 |
| 6 | 4.300871000  | -2.265784000 | -0.837790000 |
| 6 | 4.112570000  | 0.126196000  | -1.167509000 |
| 6 | 4.887060000  | -0.980391000 | -0.868700000 |
| 1 | 4.565413000  | 1.112021000  | -1.215054000 |
| 1 | 4.916057000  | -3.131350000 | -0.609649000 |
| 1 | 5.949461000  | -0.868532000 | -0.673580000 |

55  
E + ZPE = -2975.667221

|    |              |              |              |
|----|--------------|--------------|--------------|
| 28 | 0.342728000  | -0.671999000 | 0.009098000  |
| 15 | -1.357658000 | 0.469345000  | 0.793142000  |
| 6  | -2.067106000 | 0.249065000  | 2.507394000  |
| 1  | -3.027482000 | 0.783919000  | 2.496273000  |
| 6  | -1.066608000 | 1.080462000  | 3.333172000  |
| 1  | -1.435125000 | 1.213600000  | 4.356228000  |
| 1  | -0.124193000 | 0.522392000  | 3.415599000  |
| 6  | -0.848846000 | 2.438609000  | 2.635661000  |
| 1  | 0.138232000  | 2.846990000  | 2.873934000  |
| 1  | -1.581548000 | 3.160032000  | 3.012943000  |
| 6  | -1.040792000 | 2.314547000  | 1.086729000  |
| 1  | -0.113945000 | 2.579853000  | 0.569784000  |
| 6  | -2.162388000 | 3.240910000  | 0.590045000  |
| 1  | -3.122968000 | 2.997144000  | 1.056775000  |
| 1  | -2.303170000 | 3.201211000  | -0.493426000 |
| 1  | -1.918685000 | 4.275876000  | 0.856671000  |
| 6  | -2.290133000 | -1.157242000 | 3.066499000  |
| 1  | -1.339550000 | -1.661335000 | 3.265618000  |
| 1  | -2.881711000 | -1.792958000 | 2.400555000  |
| 1  | -2.825665000 | -1.088527000 | 4.020030000  |
| 6  | -2.697956000 | 0.310894000  | -0.445803000 |
| 6  | -3.966129000 | -0.162204000 | -0.082729000 |
| 1  | -4.196181000 | -0.364925000 | 0.957874000  |
| 6  | -4.957809000 | -0.379821000 | -1.041987000 |
| 1  | -5.935033000 | -0.740513000 | -0.735208000 |
| 6  | -4.685832000 | -0.135264000 | -2.384725000 |
| 1  | -5.445925000 | -0.306595000 | -3.140752000 |
| 6  | -3.424973000 | 0.332852000  | -2.758489000 |

|   |              |              |              |
|---|--------------|--------------|--------------|
| 1 | -3.219528000 | 0.529475000  | -3.807553000 |
| 6 | -2.421646000 | 0.563564000  | -1.811264000 |
| 6 | -1.123675000 | 1.165024000  | -2.299916000 |
| 1 | -0.964825000 | 2.170157000  | -1.883753000 |
| 1 | -1.174277000 | 1.270121000  | -3.389389000 |
| 8 | 0.043629000  | 0.367719000  | -1.985160000 |
| 6 | 1.154401000  | 0.783353000  | -2.791136000 |
| 1 | 1.392817000  | 1.839183000  | -2.611150000 |
| 1 | 2.005977000  | 0.166425000  | -2.509847000 |
| 1 | 0.924777000  | 0.639078000  | -3.853920000 |
| 6 | 2.258968000  | 0.681681000  | 1.132447000  |
| 6 | 2.691728000  | 1.597361000  | 0.246399000  |
| 1 | 2.179163000  | 2.558284000  | 0.180965000  |
| 1 | -1.068121000 | -2.915556000 | -1.512686000 |
| 1 | 2.814099000  | -0.236577000 | 1.304513000  |
| 1 | 1.490519000  | 0.932207000  | 1.855719000  |
| 6 | -0.325366000 | -2.408849000 | 0.490710000  |
| 6 | -1.349964000 | -3.006693000 | -0.459667000 |
| 1 | -0.604640000 | -2.557257000 | 1.531949000  |
| 1 | -2.333049000 | -2.541757000 | -0.342707000 |
| 1 | -1.462027000 | -4.077819000 | -0.241736000 |
| 6 | 1.098042000  | -2.591119000 | 0.260826000  |
| 6 | 1.599767000  | -2.181148000 | -1.006202000 |
| 1 | 0.935792000  | -2.122952000 | -1.864758000 |
| 6 | 2.028459000  | -2.948967000 | 1.280067000  |
| 1 | 1.648641000  | -3.259546000 | 2.249763000  |
| 6 | 3.383227000  | -2.952188000 | 1.024433000  |
| 6 | 2.996877000  | -2.187032000 | -1.241171000 |
| 6 | 3.875951000  | -2.562194000 | -0.243724000 |
| 1 | 3.374523000  | -1.939613000 | -2.229485000 |
| 1 | 4.079004000  | -3.270229000 | 1.795692000  |
| 1 | 4.944261000  | -2.589675000 | -0.437320000 |
| 6 | 3.937798000  | 1.476561000  | -0.594670000 |
| 1 | 4.294290000  | 0.439067000  | -0.568649000 |
| 1 | 3.726067000  | 1.731239000  | -1.640669000 |
| 6 | 5.011154000  | 2.410827000  | -0.075482000 |
| 1 | 5.365919000  | 2.204301000  | 0.933872000  |
| 6 | 5.512492000  | 3.440485000  | -0.757232000 |
| 1 | 5.181484000  | 3.678843000  | -1.766211000 |
| 1 | 6.283695000  | 4.079642000  | -0.337233000 |

56  
E + ZPE = -2975.670920

|    |              |              |              |
|----|--------------|--------------|--------------|
| 28 | -0.442834000 | 0.982333000  | -0.123247000 |
| 15 | 0.740164000  | -0.806961000 | 0.381723000  |
| 6  | 0.341308000  | -1.532551000 | 2.076724000  |
| 1  | 1.063266000  | -1.123593000 | 2.789986000  |
| 6  | 0.508769000  | -3.079210000 | 1.945347000  |
| 1  | 1.098236000  | -3.476825000 | 2.778076000  |
| 1  | -0.484258000 | -3.537451000 | 2.018414000  |
| 6  | 1.130422000  | -3.447520000 | 0.588919000  |
| 1  | 0.892323000  | -4.481085000 | 0.311499000  |
| 1  | 2.224270000  | -3.375375000 | 0.624009000  |
| 6  | 0.583540000  | -2.473422000 | -0.471308000 |
| 1  | -0.498900000 | -2.629315000 | -0.557387000 |
| 6  | 1.231322000  | -2.651101000 | -1.844891000 |
| 1  | 2.305700000  | -2.441782000 | -1.816348000 |
| 1  | 0.776605000  | -2.017080000 | -2.612961000 |
| 1  | 1.108846000  | -3.689679000 | -2.172618000 |
| 6  | -1.069452000 | -1.166627000 | 2.566206000  |
| 1  | -1.840417000 | -1.492589000 | 1.860893000  |
| 1  | -1.194614000 | -0.091625000 | 2.727202000  |

|   |              |              |              |
|---|--------------|--------------|--------------|
| 1 | -1.260243000 | -1.666632000 | 3.522745000  |
| 6 | 2.566006000  | -0.469610000 | 0.333684000  |
| 6 | 3.391309000  | -0.907075000 | 1.381231000  |
| 1 | 2.969496000  | -1.427123000 | 2.233640000  |
| 6 | 4.772711000  | -0.701998000 | 1.358384000  |
| 1 | 5.381790000  | -1.054904000 | -2.185241000 |
| 6 | 5.357999000  | -0.057179000 | 0.273983000  |
| 1 | 6.431488000  | 0.102097000  | 0.239422000  |
| 6 | 4.550898000  | 0.380350000  | -0.776521000 |
| 1 | 5.008301000  | 0.873032000  | -1.631004000 |
| 6 | 3.163125000  | 0.195525000  | -0.768873000 |
| 6 | 2.369876000  | 0.739932000  | -1.944143000 |
| 1 | 1.582942000  | 0.049833000  | -2.253032000 |
| 1 | 3.039152000  | 0.879231000  | -2.804333000 |
| 8 | 1.693851000  | 1.969682000  | -1.661953000 |
| 6 | 2.550457000  | 3.109172000  | -1.648774000 |
| 1 | 3.069286000  | 3.218577000  | -2.611034000 |
| 1 | 1.913586000  | 3.982180000  | -1.489560000 |
| 1 | 3.295679000  | 3.053382000  | -0.844864000 |
| 6 | -1.439734000 | 0.064459000  | -1.492216000 |
| 6 | -1.679322000 | 1.514980000  | -1.745225000 |
| 1 | -2.733951000 | 1.793701000  | -1.755907000 |
| 1 | -1.304480000 | 2.196333000  | -0.881720000 |
| 1 | -0.808337000 | -0.399848000 | -2.248074000 |
| 6 | 0.608183000  | 1.886457000  | 1.445415000  |
| 6 | -0.312408000 | 2.797979000  | 0.980124000  |
| 1 | 0.437738000  | 1.385178000  | 2.394866000  |
| 1 | 1.638846000  | 1.931672000  | 1.111865000  |
| 1 | 0.027656000  | 3.527803000  | 0.244087000  |
| 1 | -1.144750000 | 1.903457000  | -2.612645000 |
| 6 | -2.590541000 | -0.790862000 | -1.105007000 |
| 6 | -3.565436000 | -0.360224000 | -0.184475000 |
| 1 | -3.495423000 | 0.630548000  | 0.258540000  |
| 6 | -2.740873000 | -2.067064000 | -1.677177000 |
| 1 | -2.020609000 | -2.406954000 | -2.417701000 |
| 6 | -3.819059000 | -2.885515000 | -1.341494000 |
| 6 | -4.640661000 | -1.179025000 | 0.154557000  |
| 6 | -4.770190000 | -2.446912000 | -0.418988000 |
| 1 | -5.383697000 | -0.825370000 | 0.863800000  |
| 1 | -3.920876000 | -3.860910000 | -1.808477000 |
| 1 | -5.611921000 | -3.081234000 | -0.157628000 |
| 6 | -1.561578000 | 3.184158000  | 1.752893000  |
| 1 | -1.233616000 | 3.950668000  | 2.475252000  |
| 1 | -1.924543000 | 2.340036000  | 2.351287000  |
| 6 | -2.679318000 | 3.762834000  | 0.923909000  |
| 1 | -2.395549000 | 4.555843000  | 0.229571000  |
| 6 | -3.962781000 | 3.413362000  | 1.024161000  |
| 1 | -4.296720000 | 2.652527000  | 1.727302000  |
| 1 | -4.733654000 | 3.895055000  | 0.429640000  |

57  
E + ZPE = -2975.666132

|    |              |              |              |
|----|--------------|--------------|--------------|
| 28 | -0.641966000 | 0.551272000  | -0.653689000 |
| 15 | 0.663438000  | -0.775706000 | 0.502698000  |
| 6  | 0.071868000  | -1.060719000 | 2.264930000  |
| 1  | 0.349724000  | -0.198019000 | 2.878812000  |
| 6  | 0.775482000  | -2.363972000 | 2.757007000  |
| 1  | 1.532021000  | -2.135656000 | 3.513611000  |
| 1  | 0.027303000  | -2.992690000 | 3.250717000  |
| 6  | 1.420289000  | -3.122882000 | 1.571189000  |
| 1  | 1.274658000  | -4.205039000 | 1.663042000  |
| 1  | 2.503231000  | -2.954374000 | 1.559146000  |

|   |              |              |              |    |              |              |              |
|---|--------------|--------------|--------------|----|--------------|--------------|--------------|
| 6 | 0.836775000  | -2.628805000 | 0.230516000  | 15 | -1.156141000 | 0.881344000  | 0.260650000  |
| 1 | -0.203645000 | -2.968038000 | 0.142340000  | 6  | -0.971807000 | 1.802863000  | 1.896477000  |
| 6 | 1.633141000  | -3.146327000 | -0.968247000 | 1  | -1.036987000 | 1.078688000  | 2.714426000  |
| 1 | 2.666256000  | -2.783623000 | -0.949918000 | 6  | -2.132198000 | 2.843682000  | 1.966719000  |
| 1 | 1.186796000  | -2.873352000 | -1.929474000 | 1  | -2.794435000 | 2.631098000  | 2.811896000  |
| 1 | 1.672126000  | -4.240936000 | -0.930779000 | 1  | -1.698310000 | 3.831129000  | 2.157776000  |
| 6 | -1.459277000 | -1.210754000 | 2.320083000  | 6  | -2.929339000 | 2.864168000  | 0.646576000  |
| 1 | -1.810314000 | -2.053458000 | 1.717120000  | 1  | -3.293388000 | 3.872057000  | 0.416965000  |
| 1 | -1.984923000 | -0.317143000 | 1.976814000  | 1  | -3.815415000 | 2.223566000  | 0.724473000  |
| 1 | -1.762056000 | -1.398892000 | 3.356317000  | 6  | -2.052218000 | 2.349462000  | -0.513562000 |
| 6 | 2.403440000  | -0.141692000 | 0.622363000  | 1  | -1.256520000 | 3.080288000  | -0.712315000 |
| 6 | 2.974830000  | 0.070016000  | 1.888684000  | 6  | -2.876774000 | 2.140110000  | -1.784938000 |
| 1 | 2.399203000  | -0.110347000 | 2.788366000  | 1  | -3.646464000 | 1.374557000  | -1.639609000 |
| 6 | 4.293872000  | 0.502178000  | 2.034529000  | 1  | -2.269648000 | 1.864062000  | -2.649409000 |
| 1 | 4.702715000  | 0.654153000  | 3.029009000  | 1  | -3.390527000 | 3.074411000  | -2.038186000 |
| 6 | 5.079051000  | 0.715599000  | 0.905979000  | 6  | 0.398728000  | 2.498088000  | 1.988950000  |
| 1 | 6.113043000  | 1.032315000  | 1.003819000  | 1  | 0.546809000  | 3.206631000  | 1.165725000  |
| 6 | 4.525332000  | 0.512672000  | -0.357400000 | 1  | 1.232653000  | 1.790678000  | 1.979748000  |
| 1 | 5.142710000  | 0.664022000  | -1.239168000 | 1  | 0.454448000  | 3.067783000  | 2.923417000  |
| 6 | 3.194488000  | 0.109451000  | -0.528682000 | 6  | -2.496663000 | -0.379526000 | 0.501377000  |
| 6 | 2.672490000  | 0.002104000  | -1.951276000 | 6  | -3.189694000 | -0.440719000 | 1.720743000  |
| 1 | 1.879072000  | -0.741354000 | -2.030446000 | 1  | -2.947281000 | 0.243260000  | 2.525773000  |
| 1 | 3.488128000  | -0.311767000 | -2.619229000 | 6  | -4.211522000 | -1.368024000 | 1.933842000  |
| 8 | 2.090551000  | 1.210152000  | -2.442632000 | 1  | -4.728529000 | -1.388252000 | 2.888617000  |
| 6 | 3.027507000  | 2.203920000  | -2.844165000 | 6  | -4.568639000 | -2.249475000 | 0.918236000  |
| 1 | 3.730920000  | 1.804217000  | -3.588772000 | 1  | -5.369646000 | -2.967370000 | 1.066810000  |
| 1 | 2.449975000  | 3.011583000  | -3.299541000 | 6  | -3.891819000 | -2.197321000 | -0.300195000 |
| 1 | 3.595048000  | 2.604293000  | -1.994306000 | 1  | -4.181391000 | -2.872457000 | -1.101606000 |
| 6 | -1.187268000 | -0.694361000 | -1.977886000 | 6  | -2.851642000 | -1.287897000 | -0.528077000 |
| 6 | -1.039844000 | 0.483568000  | -2.905048000 | 6  | -2.141346000 | -1.334102000 | -1.868864000 |
| 1 | -1.910420000 | 0.632258000  | -3.552991000 | 1  | -1.832377000 | -0.337043000 | -2.181358000 |
| 1 | -0.976436000 | 1.447257000  | -2.326734000 | 1  | -2.824381000 | -1.724386000 | -2.636497000 |
| 1 | -0.601938000 | -1.571334000 | -2.238223000 | 8  | -0.938463000 | -2.109221000 | -1.860937000 |
| 6 | 0.183436000  | 2.354467000  | 0.007214000  | 6  | -1.148349000 | -3.514996000 | -1.961179000 |
| 6 | -1.169259000 | 2.413732000  | 0.239411000  | 1  | -1.715378000 | -3.762645000 | -2.869672000 |
| 1 | 0.880764000  | 2.196364000  | 0.826103000  | 1  | -0.160436000 | -3.976853000 | -2.020720000 |
| 1 | 0.630836000  | 2.718645000  | -0.913147000 | 1  | -1.679671000 | -3.915263000 | -1.087773000 |
| 1 | -1.806428000 | 2.841025000  | -0.537583000 | 6  | 0.959173000  | 1.267635000  | -1.832262000 |
| 1 | -0.122888000 | 0.443175000  | -3.491315000 | 6  | 0.440587000  | 0.759301000  | -3.172488000 |
| 6 | -2.518047000 | -0.979703000 | -1.414316000 | 1  | 1.105737000  | 1.097076000  | -3.977885000 |
| 6 | -3.481354000 | 0.043083000  | -1.255015000 | 1  | 0.375552000  | -0.331204000 | -3.227579000 |
| 1 | -3.301802000 | 1.034599000  | -1.659757000 | 1  | 0.705092000  | 2.313347000  | -1.655196000 |
| 6 | -2.854624000 | -2.279465000 | -0.973661000 | 6  | 0.405086000  | -1.442658000 | 1.076116000  |
| 1 | -2.148495000 | -3.090876000 | -1.131363000 | 6  | 1.771612000  | -1.377326000 | 0.974530000  |
| 6 | -4.086086000 | -2.540554000 | -0.387830000 | 1  | -0.086729000 | -1.058606000 | 1.966719000  |
| 6 | -4.711480000 | -0.220250000 | -0.648183000 | 1  | -0.174414000 | -2.136605000 | 0.476634000  |
| 6 | -5.015855000 | -1.507328000 | -0.208416000 | 1  | 2.265028000  | -2.043953000 | 0.273496000  |
| 1 | -5.441221000 | 0.577631000  | -0.545313000 | 1  | -0.551793000 | 1.158316000  | -3.389661000 |
| 1 | -4.333770000 | -3.552166000 | -0.079266000 | 6  | 2.332998000  | 0.960971000  | -1.461427000 |
| 1 | -5.979365000 | -1.715261000 | 0.246964000  | 6  | 2.811269000  | -0.358323000 | -1.664445000 |
| 6 | -1.800721000 | 2.388377000  | 1.615371000  | 1  | 2.226586000  | -1.063958000 | -2.247443000 |
| 1 | -1.115828000 | 1.902606000  | 2.323408000  | 6  | 3.191048000  | 1.897383000  | -0.808512000 |
| 1 | -2.734673000 | 1.814937000  | 1.609128000  | 1  | 2.827365000  | 2.906345000  | -0.633401000 |
| 6 | -2.090804000 | 3.803563000  | 2.066548000  | 6  | 4.480231000  | 1.547986000  | -0.465237000 |
| 1 | -1.220417000 | 4.449404000  | 2.180591000  | 6  | 4.128920000  | -0.701282000 | -1.305276000 |
| 6 | -3.311143000 | 4.282497000  | 2.306884000  | 6  | 4.956796000  | 0.242069000  | -0.720271000 |
| 1 | -4.202129000 | 3.666781000  | 2.201085000  | 1  | 4.499146000  | -1.701003000 | -1.511922000 |
| 1 | -3.466143000 | 5.307336000  | 2.631298000  | 1  | 5.139361000  | 2.282210000  | -0.011348000 |
|   |              |              |              | 1  | 5.981825000  | -0.013995000 | -0.468494000 |
|   |              |              |              | 6  | 2.670199000  | -0.809366000 | 2.051970000  |
|   |              |              |              | 1  | 2.080825000  | -0.162326000 | 2.715633000  |
|   |              |              |              | 1  | 3.471145000  | -0.200541000 | 1.619482000  |
|   |              |              |              | 6  | 3.281466000  | -1.937394000 | 2.854888000  |
|   |              |              |              | 1  | 2.575677000  | -2.568000000 | 3.395391000  |

58  
E + ZPE = -2975.679280

28 0.814329000 0.068413000 -0.324708000

|   |             |              |             |
|---|-------------|--------------|-------------|
| 6 | 4.587114000 | -2.196180000 | 2.922145000 |
| 1 | 5.320652000 | -1.590170000 | 2.394267000 |
| 1 | 4.975123000 | -3.017609000 | 3.517403000 |

**59**  
E + ZPE = -2975.670344

|    |              |              |              |
|----|--------------|--------------|--------------|
| 28 | -0.525095000 | -0.505616000 | -0.459231000 |
| 15 | 1.412671000  | -0.595332000 | 0.553587000  |
| 6  | 1.360766000  | -0.694541000 | 2.441699000  |
| 1  | 1.591606000  | 0.305393000  | 2.822125000  |
| 6  | 2.474946000  | -1.700636000 | 2.857744000  |
| 1  | 2.985946000  | -1.357403000 | 3.763589000  |
| 1  | 1.999692000  | -2.656793000 | 3.109921000  |
| 6  | 3.453782000  | -1.922439000 | 1.698511000  |
| 1  | 4.048410000  | -2.831850000 | 1.844541000  |
| 1  | 4.164503000  | -1.090181000 | 1.619213000  |
| 6  | 2.632216000  | -2.021476000 | 0.399104000  |
| 1  | 2.009511000  | -2.924564000 | 0.455377000  |
| 6  | 3.498974000  | -2.082111000 | -0.860528000 |
| 1  | 4.096648000  | -1.172756000 | -0.980769000 |
| 1  | 2.911005000  | -2.231960000 | -1.771322000 |
| 1  | 4.194555000  | -2.925401000 | -0.784148000 |
| 6  | -0.007219000 | -1.109843000 | 3.001727000  |
| 1  | -0.317297000 | -2.087939000 | 2.618101000  |
| 1  | -0.794744000 | -0.389935000 | 2.764962000  |
| 1  | 0.056195000  | -1.191568000 | 4.093075000  |
| 6  | 2.427359000  | 0.895310000  | 0.113144000  |
| 6  | 3.195103000  | 1.578481000  | 1.066751000  |
| 1  | 3.217844000  | 1.242624000  | 2.097423000  |
| 6  | 3.959319000  | 2.696730000  | 0.722598000  |
| 1  | 4.546014000  | 3.201466000  | 1.484384000  |
| 6  | 3.968175000  | 3.153335000  | -0.591440000 |
| 1  | 4.558978000  | 4.020580000  | -0.870194000 |
| 6  | 3.211438000  | 2.483093000  | -1.553983000 |
| 1  | 3.226336000  | 2.831400000  | -2.583911000 |
| 6  | 2.440342000  | 1.363061000  | -1.226431000 |
| 6  | 1.649130000  | 0.683777000  | -2.325607000 |
| 1  | 1.814108000  | -0.395404000 | -2.334668000 |
| 1  | 1.952052000  | 1.072928000  | -3.304426000 |
| 8  | 0.220894000  | 0.841563000  | -2.180043000 |
| 6  | -0.283075000 | 2.051014000  | -2.760343000 |
| 1  | -0.067378000 | 2.072836000  | -3.835282000 |
| 1  | -1.363832000 | 2.048224000  | -2.609005000 |
| 1  | 0.150995000  | 2.938768000  | -2.284721000 |
| 6  | -0.746475000 | -2.401851000 | -0.541961000 |
| 6  | -0.095894000 | -3.156060000 | -1.693377000 |
| 1  | -0.574610000 | -4.138998000 | -1.801134000 |
| 1  | -0.193485000 | -2.642660000 | -2.654892000 |
| 1  | -0.627387000 | -2.937615000 | 0.403675000  |
| 6  | -0.749714000 | 1.807528000  | 0.728021000  |
| 6  | -2.087832000 | 1.698531000  | 0.643304000  |
| 1  | -0.243079000 | 1.722923000  | 1.685831000  |
| 1  | -0.146258000 | 2.146719000  | -0.103602000 |
| 1  | -2.579606000 | 1.883813000  | -0.310287000 |
| 1  | 0.967735000  | -3.334708000 | -1.517585000 |
| 6  | -2.088836000 | -1.860986000 | -0.720670000 |
| 6  | -2.270935000 | -0.953073000 | -1.799786000 |
| 1  | -1.561629000 | -0.924801000 | -2.621352000 |
| 6  | -3.161476000 | -2.052074000 | 0.195632000  |
| 1  | -3.026798000 | -2.739944000 | 1.025956000  |
| 6  | -4.375268000 | -1.426858000 | -0.006489000 |
| 6  | -3.514893000 | -0.303400000 | -1.971233000 |

|   |              |              |              |
|---|--------------|--------------|--------------|
| 6 | -4.555441000 | -0.539711000 | -1.091879000 |
| 1 | -3.664774000 | 0.347156000  | -2.828482000 |
| 1 | -5.204153000 | -1.626869000 | 0.666979000  |
| 1 | -5.519816000 | -0.064425000 | -1.245111000 |
| 6 | -3.013638000 | 1.476532000  | 1.812110000  |
| 1 | -2.426225000 | 1.222473000  | 2.704725000  |
| 1 | -3.687088000 | 0.637784000  | 1.606839000  |
| 6 | -3.832499000 | 2.723242000  | 2.074151000  |
| 1 | -3.266089000 | 3.608842000  | 2.361435000  |
| 6 | -5.159024000 | 2.793163000  | 1.965405000  |
| 1 | -5.759204000 | 1.930993000  | 1.681541000  |
| 1 | -5.699226000 | 3.713162000  | 2.169172000  |

**60R**  
E + ZPE = -2859.022997

|    |              |              |              |
|----|--------------|--------------|--------------|
| 28 | 0.930362000  | -0.559745000 | 0.608481000  |
| 15 | -0.600153000 | 0.965364000  | 0.223506000  |
| 6  | -0.603979000 | 2.353161000  | 1.481724000  |
| 1  | -1.590777000 | 2.829844000  | 1.412233000  |
| 6  | 0.413280000  | 3.324174000  | 0.851182000  |
| 1  | 0.420696000  | 4.273468000  | 1.398577000  |
| 1  | 1.426543000  | 2.905315000  | 0.921777000  |
| 6  | 0.001409000  | 3.516608000  | -0.612150000 |
| 1  | 0.783789000  | 4.013630000  | -1.195761000 |
| 1  | -0.882931000 | 4.164980000  | -0.649338000 |
| 6  | -0.356684000 | 2.143811000  | -1.249425000 |
| 1  | 0.515442000  | 1.760901000  | -1.783508000 |
| 6  | -1.530876000 | 2.261080000  | -2.229060000 |
| 1  | -2.448595000 | 2.581220000  | -1.725013000 |
| 1  | -1.746927000 | 1.327511000  | -2.755581000 |
| 1  | -1.287796000 | 3.014979000  | -2.987266000 |
| 6  | -0.317841000 | 2.006474000  | 2.941988000  |
| 1  | 0.663921000  | 1.533969000  | 3.056988000  |
| 1  | -1.072112000 | 1.335616000  | 3.365239000  |
| 1  | -0.317490000 | 2.922863000  | 3.542860000  |
| 6  | -2.292051000 | 0.245332000  | 0.095755000  |
| 6  | -3.313968000 | 0.680731000  | 0.950746000  |
| 1  | -3.119919000 | 1.445436000  | 1.695108000  |
| 6  | -4.603041000 | 0.148632000  | 0.868499000  |
| 1  | -5.376293000 | 0.504872000  | 1.542588000  |
| 6  | -4.890296000 | -0.824865000 | -0.083222000 |
| 1  | -5.891853000 | -1.236053000 | -0.165874000 |
| 6  | -3.878632000 | -1.271213000 | -0.935290000 |
| 1  | -4.105252000 | -2.026580000 | -1.683858000 |
| 6  | -2.576309000 | -0.766311000 | -0.855890000 |
| 6  | -1.517269000 | -1.347633000 | -1.776104000 |
| 1  | -0.817361000 | -0.580225000 | -2.115993000 |
| 1  | -1.996058000 | -1.777744000 | -2.667260000 |
| 8  | -0.693086000 | -2.339075000 | -1.153334000 |
| 6  | -1.334407000 | -3.599419000 | -0.978744000 |
| 1  | -1.689181000 | -3.995010000 | -1.940883000 |
| 1  | -0.584437000 | -4.281254000 | -0.571455000 |
| 1  | -2.180813000 | -3.536458000 | -0.283416000 |
| 1  | 2.662963000  | -3.378045000 | -0.315222000 |
| 6  | 3.204927000  | -3.015931000 | 0.563906000  |
| 6  | 2.704165000  | -1.648646000 | 1.021191000  |
| 1  | 4.264301000  | -2.939812000 | 0.294569000  |
| 1  | 3.113399000  | -3.764469000 | 1.356457000  |
| 1  | 3.204639000  | -1.332678000 | 1.936601000  |
| 6  | 2.839488000  | -0.571321000 | -0.002199000 |
| 6  | 2.199283000  | -0.703821000 | -1.263149000 |
| 6  | 3.621319000  | 0.590306000  | 0.245691000  |



|   |              |              |              |
|---|--------------|--------------|--------------|
| 1 | 1.684731000  | -1.623279000 | -1.530957000 |
| 1 | 4.097806000  | 0.709718000  | 1.215284000  |
| 6 | 2.445627000  | 0.248042000  | -2.274075000 |
| 6 | 3.834583000  | 1.522257000  | -0.755678000 |
| 1 | 2.016742000  | 0.098420000  | -3.260888000 |
| 1 | 4.469905000  | 2.382308000  | -0.565289000 |
| 6 | 3.258690000  | 1.343839000  | -2.028385000 |
| 1 | 3.462783000  | 2.060770000  | -2.818220000 |
| 6 | -0.072039000 | -1.309425000 | 2.036005000  |
| 6 | 1.024460000  | -2.242949000 | 1.882303000  |
| 1 | 1.601899000  | -2.466393000 | 2.775731000  |
| 1 | 0.811847000  | -3.135056000 | 1.298684000  |
| 1 | -1.052453000 | -1.640326000 | 1.700330000  |
| 1 | -0.103335000 | -0.744916000 | 2.965962000  |

**60S**

E + ZPE = -2859.022732

|    |              |              |              |
|----|--------------|--------------|--------------|
| 28 | 0.909461000  | -0.626993000 | 0.419162000  |
| 15 | -0.624544000 | 0.920421000  | 0.229926000  |
| 6  | -0.504471000 | 2.232233000  | 1.557376000  |
| 1  | -1.462530000 | 2.769995000  | 1.545463000  |
| 6  | 0.560539000  | 3.155568000  | 0.932246000  |
| 1  | 0.658224000  | 4.074583000  | 1.520981000  |
| 1  | 1.540308000  | 2.658718000  | 0.955807000  |
| 6  | 0.132026000  | 3.455854000  | -0.512252000 |
| 1  | 0.975924000  | 3.812008000  | -1.111801000 |
| 1  | -0.612458000 | 4.260455000  | -0.503175000 |
| 6  | -0.511749000 | 2.195315000  | -1.170386000 |
| 1  | 0.171208000  | 1.781750000  | -1.914040000 |
| 6  | -1.843485000 | 2.532817000  | -1.855170000 |
| 1  | -2.587606000 | 2.897769000  | -1.139271000 |
| 1  | -2.280338000 | 1.680995000  | -2.383469000 |
| 1  | -1.674067000 | 3.327507000  | -2.591271000 |
| 6  | -0.184721000 | 1.806755000  | 2.990330000  |
| 1  | 0.769108000  | 1.270359000  | 3.048187000  |
| 1  | -0.963131000 | 1.170196000  | 3.423084000  |
| 1  | -0.100515000 | 2.696194000  | 3.624930000  |
| 6  | -2.322184000 | 0.212683000  | 0.197220000  |
| 6  | -3.247072000 | 0.554996000  | 1.192545000  |
| 1  | -2.974386000 | 1.249527000  | 1.980192000  |
| 6  | -4.536608000 | 0.017184000  | 1.195539000  |
| 1  | -5.235785000 | 0.298579000  | 1.977349000  |
| 6  | -4.919773000 | -0.866436000 | 0.191329000  |
| 1  | -5.922883000 | -1.281876000 | 0.177196000  |
| 6  | -4.004529000 | -1.215884000 | -0.803787000 |
| 1  | -4.308516000 | -1.898413000 | -1.593791000 |
| 6  | -2.703439000 | -0.702588000 | -0.815148000 |
| 6  | -1.747721000 | -1.157658000 | -1.904150000 |
| 1  | -1.135142000 | -0.328460000 | -2.269143000 |
| 1  | -2.318336000 | -1.545750000 | -2.759545000 |
| 8  | -0.805133000 | -2.146039000 | -1.472837000 |
| 6  | -1.361668000 | -3.449964000 | -1.333331000 |
| 1  | -1.797387000 | -3.793205000 | -2.282069000 |
| 1  | -0.540387000 | -4.116025000 | -1.059118000 |
| 1  | -2.132478000 | -3.485511000 | -0.552856000 |
| 6  | 2.532845000  | -2.025975000 | 0.415014000  |
| 6  | 2.800520000  | -0.747857000 | -0.293288000 |
| 6  | 2.053809000  | -0.481313000 | -1.474192000 |
| 6  | 3.748427000  | 0.221864000  | 0.145822000  |
| 1  | 1.443686000  | -1.264835000 | -1.918748000 |
| 1  | 4.316661000  | 0.048460000  | 1.053372000  |
| 6  | 2.363830000  | 0.657130000  | -2.254457000 |

|   |              |              |              |
|---|--------------|--------------|--------------|
| 6 | 3.992260000  | 1.353598000  | -0.608642000 |
| 1 | 1.873115000  | 0.792145000  | -3.214164000 |
| 1 | 4.740485000  | 2.067951000  | -0.277613000 |
| 6 | 3.311498000  | 1.567917000  | -1.826381000 |
| 1 | 3.556594000  | 2.432464000  | -2.436166000 |
| 6 | -0.079115000 | -1.471951000 | 1.792550000  |
| 6 | 1.185014000  | -2.179317000 | 1.849707000  |
| 1 | 1.824885000  | -1.924907000 | 2.691345000  |
| 1 | 1.140630000  | -3.251576000 | 1.672599000  |
| 1 | -0.936736000 | -2.013757000 | 1.397587000  |
| 1 | -0.324708000 | -0.855729000 | 2.654069000  |
| 1 | 2.153610000  | -2.772034000 | -0.285329000 |
| 6 | 3.698073000  | -2.596442000 | 1.215061000  |
| 1 | 4.033254000  | -1.929527000 | 2.014822000  |
| 1 | 3.434649000  | -3.555428000 | 1.669291000  |
| 1 | 4.545531000  | -2.765987000 | 0.541231000  |

**S21R**

E + ZPE = -2780.472098

|    |              |              |              |
|----|--------------|--------------|--------------|
| 28 | -1.147324000 | -0.004591000 | 0.154164000  |
| 15 | 0.964315000  | 0.770965000  | -0.062438000 |
| 6  | 1.157012000  | 1.739792000  | -1.669827000 |
| 1  | 2.135263000  | 1.476524000  | -2.087840000 |
| 6  | 1.202562000  | 3.209091000  | -1.201276000 |
| 1  | 1.596460000  | 3.851649000  | -1.996967000 |
| 1  | 0.184354000  | 3.561456000  | -0.983026000 |
| 6  | 2.060416000  | 3.269828000  | 0.068940000  |
| 1  | 2.027625000  | 4.258786000  | 0.540291000  |
| 1  | 3.111764000  | 3.073045000  | -0.180577000 |
| 6  | 1.544584000  | 2.189580000  | 1.045100000  |
| 1  | 0.612437000  | 2.556172000  | 1.493633000  |
| 6  | 2.510699000  | 1.818572000  | 2.171889000  |
| 1  | 3.450972000  | 1.413973000  | 1.785398000  |
| 1  | 2.081483000  | 1.074721000  | 2.852614000  |
| 1  | 2.747455000  | 2.709311000  | 2.764685000  |
| 6  | 0.082283000  | 1.431681000  | -2.715942000 |
| 1  | -0.923995000 | 1.622301000  | -2.323796000 |
| 1  | 0.129055000  | 0.388525000  | -3.050048000 |
| 1  | 0.217077000  | 2.062640000  | -3.601876000 |
| 6  | 2.269210000  | -0.534463000 | -0.114092000 |
| 6  | 3.558086000  | -0.220807000 | -0.576271000 |
| 1  | 3.794293000  | 0.795241000  | -0.877241000 |
| 6  | 4.561409000  | -1.186155000 | -0.657022000 |
| 1  | 5.549430000  | -0.910698000 | -1.013482000 |
| 6  | 4.285366000  | -2.499087000 | -0.283070000 |
| 1  | 5.053380000  | -3.263742000 | -0.349162000 |
| 6  | 3.011738000  | -2.827614000 | 0.179475000  |
| 1  | 2.801149000  | -3.851534000 | 0.478065000  |
| 6  | 1.997805000  | -1.867063000 | 0.282374000  |
| 6  | 0.677894000  | -2.306652000 | 0.888125000  |
| 1  | 0.461545000  | -1.748034000 | 1.803003000  |
| 1  | 0.732900000  | -3.368324000 | 1.156788000  |
| 8  | -0.483848000 | -2.108429000 | 0.059480000  |
| 6  | -0.544702000 | -2.969935000 | -1.085653000 |
| 1  | -0.490700000 | -4.018676000 | -0.770520000 |
| 1  | -1.508970000 | -2.785873000 | -1.562961000 |
| 1  | 0.269467000  | -2.756352000 | -1.787493000 |
| 1  | -1.867562000 | 2.073611000  | 2.364752000  |
| 6  | -1.671715000 | 1.100917000  | 2.824635000  |
| 6  | -1.916672000 | -0.061135000 | 1.895055000  |
| 1  | -2.334981000 | 1.013368000  | 3.696778000  |
| 1  | -0.643618000 | 1.097450000  | 3.203055000  |

|   |              |              |              |
|---|--------------|--------------|--------------|
| 1 | -1.730813000 | -1.027307000 | 2.372494000  |
| 6 | -2.982607000 | -0.085592000 | 0.908656000  |
| 6 | -3.764031000 | -1.238282000 | 0.585837000  |
| 6 | -2.955046000 | 1.023821000  | -0.004586000 |
| 1 | -3.778591000 | -2.073461000 | 1.280541000  |
| 1 | -2.650775000 | 2.009732000  | 0.335303000  |
| 6 | -4.498625000 | -1.277919000 | -0.578356000 |
| 6 | -3.722299000 | 0.943514000  | -1.198292000 |
| 1 | -5.112884000 | -2.144065000 | -0.805427000 |
| 1 | -3.748712000 | 1.794348000  | -1.872956000 |
| 6 | -4.460529000 | -0.188812000 | -1.486160000 |
| 1 | -5.050405000 | -0.232970000 | -2.397114000 |

**S21S**

E + ZPE = -2780.469466

|    |              |              |              |
|----|--------------|--------------|--------------|
| 28 | 1.171588000  | -0.212531000 | -0.141187000 |
| 15 | -1.029709000 | -0.743711000 | 0.102383000  |
| 6  | -1.911087000 | -1.832086000 | -1.165419000 |
| 1  | -2.909095000 | -1.388982000 | -1.270179000 |
| 6  | -2.063732000 | -3.186519000 | -0.442734000 |
| 1  | -2.807737000 | -3.807644000 | -0.954487000 |
| 1  | -1.113107000 | -3.737152000 | -0.474432000 |
| 6  | -2.455128000 | -2.898557000 | 1.013028000  |
| 1  | -2.443731000 | -3.805364000 | 1.628465000  |
| 1  | -3.478799000 | -2.502511000 | 1.052714000  |
| 6  | -1.464311000 | -1.853465000 | 1.569466000  |
| 1  | -0.514557000 | -2.369775000 | 1.766609000  |
| 6  | -1.898450000 | -1.150332000 | 2.857283000  |
| 1  | -2.838823000 | -0.605821000 | 2.730875000  |
| 1  | -1.143530000 | -0.436909000 | 3.206671000  |
| 1  | -2.045508000 | -1.890597000 | 3.651753000  |
| 6  | -1.271865000 | -1.903452000 | -2.552252000 |
| 1  | -0.261774000 | -2.323690000 | -2.514628000 |
| 1  | -1.213068000 | -0.916045000 | -3.022671000 |
| 1  | -1.872417000 | -2.544044000 | -3.208141000 |
| 6  | -2.047830000 | 0.797032000  | 0.162821000  |
| 6  | -3.439562000 | 0.724338000  | 0.334930000  |
| 1  | -3.921041000 | -0.241894000 | 0.452458000  |
| 6  | -4.231682000 | 1.872138000  | 0.360981000  |
| 1  | -5.304842000 | 1.785217000  | 0.502233000  |
| 6  | -3.639561000 | 3.123103000  | 0.201479000  |
| 1  | -4.245127000 | 4.024181000  | 0.213807000  |
| 6  | -2.260076000 | 3.212440000  | 0.018857000  |
| 1  | -1.800868000 | 4.189331000  | -0.110671000 |
| 6  | -1.450100000 | 2.070353000  | 0.002872000  |
| 6  | 0.043431000  | 2.266792000  | -0.158955000 |
| 1  | 0.595753000  | 1.873633000  | 0.709904000  |
| 1  | 0.277921000  | 3.336929000  | -0.209195000 |
| 8  | 0.633384000  | 1.606420000  | -1.291767000 |
| 6  | 0.185465000  | 2.080277000  | -2.568076000 |
| 1  | 0.414140000  | 3.147365000  | -2.675251000 |
| 1  | 0.737030000  | 1.513232000  | -3.319205000 |
| 1  | -0.890641000 | 1.920536000  | -2.695646000 |
| 1  | 2.374735000  | -3.100203000 | -0.076587000 |
| 6  | 2.418397000  | -2.704938000 | -1.094892000 |
| 6  | 2.470876000  | -1.198535000 | -1.150246000 |
| 1  | 1.566739000  | -3.102509000 | -1.655798000 |
| 1  | 3.326120000  | -3.111213000 | -1.563823000 |
| 1  | 2.532593000  | -0.808898000 | -2.171089000 |
| 6  | 3.138307000  | -0.392865000 | -0.152771000 |
| 6  | 2.676052000  | -0.643787000 | 1.189759000  |
| 6  | 3.907792000  | 0.784780000  | -0.422737000 |

|   |             |              |              |
|---|-------------|--------------|--------------|
| 1 | 2.409256000 | -1.649957000 | 1.501874000  |
| 1 | 4.252540000 | 0.965088000  | -1.437081000 |
| 6 | 3.022570000 | 0.287050000  | 2.212081000  |
| 6 | 4.223942000 | 1.654105000  | 0.593684000  |
| 1 | 2.728320000 | 0.082964000  | 3.237568000  |
| 1 | 4.833100000 | 2.529868000  | 0.391354000  |
| 6 | 3.762768000 | 1.412835000  | 1.916820000  |
| 1 | 4.033211000 | 2.105776000  | 2.708371000  |

**61**

E + ZPE = -2859.024163

|    |              |              |              |
|----|--------------|--------------|--------------|
| 28 | -0.973968000 | -0.190760000 | 0.657009000  |
| 15 | 0.949543000  | 0.723313000  | -0.056995000 |
| 6  | 1.050020000  | 1.683637000  | -1.691851000 |
| 1  | 1.969273000  | 1.322131000  | -2.166388000 |
| 6  | 1.277125000  | 3.151829000  | -1.275529000 |
| 1  | 1.688103000  | 3.721891000  | -2.116819000 |
| 1  | 0.321130000  | 3.621624000  | -1.015476000 |
| 6  | 2.217131000  | 3.170786000  | -0.064402000 |
| 1  | 2.258585000  | 4.162027000  | 0.401837000  |
| 1  | 3.241735000  | 2.935008000  | -0.379879000 |
| 6  | 1.729777000  | 2.120449000  | 0.961173000  |
| 1  | 0.870741000  | 2.547383000  | 1.491014000  |
| 6  | 2.784764000  | 1.740732000  | 2.005272000  |
| 1  | 3.665101000  | 1.275612000  | 1.553555000  |
| 1  | 2.395219000  | 1.055637000  | 2.763485000  |
| 1  | 3.118334000  | 2.646146000  | 2.525282000  |
| 6  | -0.098452000 | 1.477557000  | -2.678590000 |
| 1  | -1.059618000 | 1.782574000  | -2.258004000 |
| 1  | -0.188081000 | 0.431875000  | -2.990135000 |
| 1  | 0.077339000  | 2.074243000  | -3.581258000 |
| 6  | 2.264818000  | -0.574685000 | -0.290261000 |
| 6  | 3.539049000  | -0.156401000 | -0.721540000 |
| 1  | 3.732053000  | 0.896877000  | -0.892127000 |
| 6  | 4.581476000  | -1.053934000 | -0.938800000 |
| 1  | 5.551093000  | -0.686949000 | -1.261628000 |
| 6  | 4.366600000  | -2.417492000 | -0.749668000 |
| 1  | 5.163229000  | -3.133416000 | -0.927266000 |
| 6  | 3.109520000  | -2.856755000 | -0.346311000 |
| 1  | 2.934285000  | -3.921935000 | -0.215582000 |
| 6  | 2.059226000  | -1.960431000 | -0.100425000 |
| 6  | 0.773723000  | -2.576888000 | 0.410612000  |
| 1  | 0.700927000  | -2.504514000 | 1.496813000  |
| 1  | 0.746082000  | -3.641733000 | 0.154100000  |
| 8  | -0.435038000 | -1.975178000 | -0.087313000 |
| 6  | -0.667960000 | -2.253515000 | -1.483814000 |
| 1  | -0.728030000 | -3.337654000 | -1.623283000 |
| 1  | -1.618568000 | -1.794489000 | -1.746887000 |
| 1  | 0.141159000  | -1.844384000 | -2.096284000 |
| 1  | -1.565157000 | 2.992662000  | -0.177539000 |
| 6  | -1.890430000 | 2.783669000  | 0.844856000  |
| 6  | -2.089251000 | 1.309818000  | 1.121479000  |
| 1  | -2.830978000 | 3.329558000  | 1.004774000  |
| 1  | -1.155961000 | 3.222436000  | 1.527026000  |
| 1  | -2.319285000 | 1.152742000  | 2.179786000  |
| 6  | -2.952897000 | 0.524921000  | 0.236632000  |
| 6  | -3.280374000 | -0.795122000 | 0.646440000  |
| 6  | -3.368063000 | 0.933894000  | -1.063701000 |
| 1  | -3.204436000 | -1.073814000 | 1.688536000  |
| 1  | -3.185257000 | 1.954002000  | -1.383772000 |
| 6  | -3.958826000 | -1.673030000 | -0.223015000 |
| 6  | -4.051895000 | 0.069668000  | -1.896620000 |

|   |              |              |              |
|---|--------------|--------------|--------------|
| 1 | -4.227455000 | -2.666309000 | 0.124879000  |
| 1 | -4.389573000 | 0.414394000  | -2.869872000 |
| 6 | -4.336056000 | -1.250665000 | -1.486677000 |
| 1 | -4.885164000 | -1.915652000 | -2.146862000 |
| 6 | -0.037332000 | -0.409190000 | 2.983033000  |
| 6 | -1.101177000 | -1.225710000 | 3.082982000  |
| 1 | -0.104852000 | 0.641449000  | 3.246632000  |
| 1 | 0.961935000  | -0.790278000 | 2.795590000  |
| 1 | -2.060272000 | -0.855276000 | 3.430457000  |
| 1 | -1.028456000 | -2.299706000 | 2.934827000  |

**62**  
E + ZPE = -2859.031917

|    |              |              |              |
|----|--------------|--------------|--------------|
| 28 | -0.943042000 | -0.340311000 | 0.911969000  |
| 15 | 0.948233000  | 0.731032000  | -0.085720000 |
| 6  | 1.107107000  | 1.737958000  | -1.691236000 |
| 1  | 2.094202000  | 1.473380000  | -2.086632000 |
| 6  | 1.174047000  | 3.202840000  | -1.216991000 |
| 1  | 1.549272000  | 3.845335000  | -2.022193000 |
| 1  | 0.168231000  | 3.568400000  | -0.968463000 |
| 6  | 2.078194000  | 3.252114000  | 0.021051000  |
| 1  | 2.037940000  | 4.228152000  | 0.518433000  |
| 1  | 3.123654000  | 3.098517000  | -0.276799000 |
| 6  | 1.635318000  | 2.136581000  | 0.995724000  |
| 1  | 0.743702000  | 2.496004000  | 1.519868000  |
| 6  | 2.675962000  | 1.770254000  | 2.058178000  |
| 1  | 3.597410000  | 1.377399000  | 1.620521000  |
| 1  | 2.297065000  | 1.026126000  | 2.765895000  |
| 1  | 2.937076000  | 2.665892000  | 2.633868000  |
| 6  | 0.084986000  | 1.465034000  | -2.793722000 |
| 1  | -0.934955000 | 1.695363000  | -2.478705000 |
| 1  | 0.108139000  | 0.420618000  | -3.122661000 |
| 1  | 0.311729000  | 2.086245000  | -3.668107000 |
| 6  | 2.323097000  | -0.516211000 | -0.287863000 |
| 6  | 3.594830000  | -0.029128000 | -0.652558000 |
| 1  | 3.748569000  | 1.037914000  | -0.768935000 |
| 6  | 4.682824000  | -0.869738000 | -0.869443000 |
| 1  | 5.645995000  | -0.447695000 | -1.140034000 |
| 6  | 4.520551000  | -2.248151000 | -0.747974000 |
| 1  | 5.352026000  | -2.922505000 | -0.928644000 |
| 6  | 3.272015000  | -2.755019000 | -0.404285000 |
| 1  | 3.140957000  | -3.831242000 | -0.319511000 |
| 6  | 2.173946000  | -1.916788000 | -0.156298000 |
| 6  | 0.922824000  | -2.630984000 | 0.319061000  |
| 1  | 0.885196000  | -2.663811000 | 1.411042000  |
| 1  | 0.936572000  | -3.669526000 | -0.030830000 |
| 8  | -0.324442000 | -2.045714000 | -0.083274000 |
| 6  | -0.622827000 | -2.237591000 | -1.479472000 |
| 1  | -0.661075000 | -3.311391000 | -1.690604000 |
| 1  | -1.599690000 | -1.791724000 | -1.662819000 |
| 1  | 0.137260000  | -1.763770000 | -2.108431000 |
| 1  | -1.409205000 | 2.820086000  | 0.438015000  |
| 6  | -1.935937000 | 2.490279000  | 1.337143000  |
| 6  | -2.229213000 | 1.005947000  | 1.361277000  |
| 1  | -2.876380000 | 3.056183000  | 1.395681000  |
| 1  | -1.337225000 | 2.781796000  | 2.205643000  |
| 1  | -2.665238000 | 0.738274000  | 2.325455000  |
| 6  | -2.977277000 | 0.397428000  | 0.235558000  |
| 6  | -3.637667000 | -0.845574000 | 0.414262000  |
| 6  | -3.089214000 | 1.015954000  | -1.034552000 |
| 1  | -3.649497000 | -1.311081000 | 1.392742000  |
| 1  | -2.656206000 | 1.997971000  | -1.187139000 |

|   |              |              |              |
|---|--------------|--------------|--------------|
| 6 | -4.332693000 | -1.453470000 | -0.631826000 |
| 6 | -3.793989000 | 0.416148000  | -2.070226000 |
| 1 | -4.838065000 | -2.399738000 | -0.463518000 |
| 1 | -3.881690000 | 0.921888000  | -3.027312000 |
| 6 | -4.409276000 | -0.827948000 | -1.876516000 |
| 1 | -4.965353000 | -1.290958000 | -2.686545000 |
| 6 | -0.202658000 | -0.582104000 | 2.778163000  |
| 6 | -1.293688000 | -1.429647000 | 2.610557000  |
| 1 | -0.308268000 | 0.338503000  | 3.346558000  |
| 1 | 0.817216000  | -0.955630000 | 2.715780000  |
| 1 | -2.242679000 | -1.192768000 | 3.081778000  |
| 1 | -1.157070000 | -2.482393000 | 2.375394000  |

**63**  
E + ZPE = -2859.021107

|    |              |              |              |
|----|--------------|--------------|--------------|
| 28 | -0.746866000 | -0.683793000 | -0.932939000 |
| 15 | 1.454684000  | -0.618792000 | 0.164398000  |
| 6  | 1.617523000  | -1.070846000 | 2.002872000  |
| 1  | 2.379016000  | -0.380898000 | 2.385408000  |
| 6  | 2.221036000  | -2.489259000 | 1.989488000  |
| 1  | 2.627783000  | -2.739104000 | 2.976309000  |
| 1  | 1.436454000  | -3.228303000 | 1.773220000  |
| 6  | 3.295043000  | -2.530705000 | 0.895477000  |
| 1  | 3.664187000  | -3.548078000 | 0.721694000  |
| 1  | 4.162609000  | -1.929619000 | 1.198464000  |
| 6  | 2.673431000  | -1.956388000 | -0.395496000 |
| 1  | 2.008135000  | -2.729019000 | -0.804443000 |
| 6  | 3.673647000  | -1.566215000 | -1.486717000 |
| 1  | 4.354196000  | -0.776182000 | -1.156132000 |
| 1  | 3.173601000  | -1.213103000 | -2.396060000 |
| 1  | 4.279571000  | -2.436830000 | -1.762190000 |
| 6  | 0.367326000  | -0.912542000 | 2.867731000  |
| 1  | -0.424873000 | -1.608725000 | 2.573543000  |
| 1  | -0.036176000 | 0.104789000  | 2.825000000  |
| 1  | 0.611866000  | -1.125323000 | 3.914808000  |
| 6  | 2.289335000  | 1.030695000  | 0.070965000  |
| 6  | 3.570461000  | 1.194689000  | 0.626475000  |
| 1  | 4.073609000  | 0.349609000  | 1.085510000  |
| 6  | 4.226665000  | 2.424412000  | 0.604127000  |
| 1  | 5.219218000  | 2.515454000  | 1.035032000  |
| 6  | 3.598681000  | 3.529918000  | 0.034398000  |
| 1  | 4.091924000  | 4.497073000  | 0.019697000  |
| 6  | 2.324089000  | 3.388360000  | -0.510863000 |
| 1  | 1.832555000  | 4.253197000  | -0.949529000 |
| 6  | 1.661398000  | 2.154326000  | -0.513848000 |
| 6  | 0.316378000  | 2.087202000  | -1.207666000 |
| 1  | 0.385121000  | 1.506614000  | -2.129646000 |
| 1  | -0.005629000 | 3.096645000  | -1.490053000 |
| 8  | -0.736361000 | 1.473532000  | -0.442360000 |
| 6  | -1.169385000 | 2.299476000  | 0.652216000  |
| 1  | -1.569155000 | 3.243140000  | 0.264015000  |
| 1  | -1.953811000 | 1.756407000  | 1.173072000  |
| 1  | -0.335201000 | 2.505882000  | 1.331911000  |
| 1  | -1.398930000 | -2.453351000 | 0.956354000  |
| 6  | -2.125299000 | -2.666166000 | 0.160813000  |
| 6  | -2.507110000 | -1.433939000 | -0.649425000 |
| 1  | -3.012886000 | -3.078296000 | 0.659321000  |
| 1  | -1.705108000 | -3.453218000 | -0.468060000 |
| 1  | -2.966212000 | -1.718387000 | -1.596131000 |
| 6  | -3.310635000 | -0.393815000 | 0.031221000  |
| 6  | -4.043740000 | 0.536363000  | -0.737911000 |
| 6  | -3.422649000 | -0.323371000 | 1.435789000  |

|   |              |              |              |
|---|--------------|--------------|--------------|
| 1 | -3.981605000 | 0.492742000  | -1.822533000 |
| 1 | -2.893101000 | -1.035709000 | 2.060210000  |
| 6 | -4.856176000 | 1.487915000  | -0.133295000 |
| 6 | -4.248554000 | 0.623655000  | 2.042420000  |
| 1 | -5.420370000 | 2.185309000  | -0.745557000 |
| 1 | -4.340231000 | 0.643730000  | 3.124586000  |
| 6 | -4.964948000 | 1.533104000  | 1.261870000  |
| 1 | -5.612744000 | 2.265607000  | 1.734370000  |
| 6 | -0.361501000 | -1.882977000 | -2.444857000 |
| 6 | -0.995682000 | -0.709238000 | -2.888441000 |
| 1 | -0.914669000 | -2.818008000 | -2.418026000 |
| 1 | 0.710914000  | -2.006102000 | -2.575918000 |
| 1 | -2.029725000 | -0.718671000 | -3.219010000 |
| 1 | -0.403475000 | 0.092659000  | -3.328103000 |

**64**  
E + ZPE = -2859.029111

|    |              |              |              |
|----|--------------|--------------|--------------|
| 28 | 0.617716000  | -1.154175000 | -0.015670000 |
| 15 | -1.682128000 | -0.394283000 | 0.109959000  |
| 6  | -2.872334000 | -1.068941000 | -1.202858000 |
| 1  | -3.438356000 | -0.199150000 | -1.558444000 |
| 6  | -3.833213000 | -1.993006000 | -0.420545000 |
| 1  | -4.755820000 | -2.149293000 | -0.990983000 |
| 1  | -3.372385000 | -2.983066000 | -0.294362000 |
| 6  | -4.102215000 | -1.368697000 | 0.953824000  |
| 1  | -4.634497000 | -2.059598000 | 1.617889000  |
| 1  | -4.738914000 | -0.480772000 | 0.850356000  |
| 6  | -2.738077000 | -0.980340000 | 1.562015000  |
| 1  | -2.251768000 | -1.917625000 | 1.866739000  |
| 6  | -2.794186000 | -0.058010000 | 2.782390000  |
| 1  | -3.262808000 | 0.901793000  | 2.547569000  |
| 1  | -1.796393000 | 0.149156000  | 3.186142000  |
| 1  | -3.380042000 | -0.531781000 | 3.577887000  |
| 6  | -2.208563000 | -1.743367000 | -2.407615000 |
| 1  | -1.587565000 | -2.595807000 | -2.108516000 |
| 1  | -1.581002000 | -1.046565000 | -2.972713000 |
| 1  | -2.974152000 | -2.121230000 | -3.094858000 |
| 6  | -1.834429000 | 1.441431000  | 0.000826000  |
| 6  | -3.097173000 | 2.057398000  | 0.025977000  |
| 1  | -3.993939000 | 1.450772000  | 0.099404000  |
| 6  | -3.233390000 | 3.443558000  | -0.039258000 |
| 1  | -4.222143000 | 3.891399000  | -0.010424000 |
| 6  | -2.098119000 | 4.244715000  | -0.147888000 |
| 1  | -2.190598000 | 5.324889000  | -0.206764000 |
| 6  | -0.839032000 | 3.649039000  | -0.201089000 |
| 1  | 0.044598000  | 4.273385000  | -0.307471000 |
| 6  | -0.688195000 | 2.259686000  | -0.120237000 |
| 6  | 0.716602000  | 1.701521000  | -0.162422000 |
| 1  | 1.052400000  | 1.335259000  | 0.812666000  |
| 1  | 1.429897000  | 2.470806000  | -0.475030000 |
| 8  | 0.862118000  | 0.570213000  | -1.057730000 |
| 6  | 0.664232000  | 0.900181000  | -2.445541000 |
| 1  | 1.449920000  | 1.592920000  | -2.763847000 |
| 1  | 0.736500000  | -0.026727000 | -3.012348000 |
| 1  | -0.318564000 | 1.355420000  | -2.598725000 |
| 1  | 2.390396000  | -1.264722000 | -2.495159000 |
| 6  | 2.624359000  | -2.055337000 | -1.777244000 |
| 6  | 2.494362000  | -1.622349000 | -0.318994000 |
| 1  | 3.655745000  | -2.371840000 | -1.985979000 |
| 1  | 1.976312000  | -2.909707000 | -2.003263000 |
| 1  | 2.715502000  | -2.485449000 | 0.314609000  |
| 6  | 3.341060000  | -0.475584000 | 0.131477000  |

|   |              |              |              |
|---|--------------|--------------|--------------|
| 6 | 3.632495000  | -0.316521000 | 1.502442000  |
| 6 | 3.883961000  | 0.472463000  | -0.757754000 |
| 1 | 3.264392000  | -1.049496000 | 2.216231000  |
| 1 | 3.716879000  | 0.369240000  | -1.825170000 |
| 6 | 4.409217000  | 0.743338000  | 1.966069000  |
| 6 | 4.670087000  | 1.528447000  | -0.298690000 |
| 1 | 4.622249000  | 0.831488000  | 3.027680000  |
| 1 | 5.093896000  | 2.231568000  | -1.010778000 |
| 6 | 4.929764000  | 1.675741000  | 1.066100000  |
| 1 | 5.544807000  | 2.497112000  | 1.421736000  |
| 6 | 0.174191000  | -3.041842000 | 0.492515000  |
| 6 | 0.549812000  | -2.312069000 | 1.613668000  |
| 1 | 0.868650000  | -3.731720000 | 0.021007000  |
| 1 | -0.875245000 | -3.232917000 | 0.281493000  |
| 1 | 1.536309000  | -2.433253000 | 2.047023000  |
| 1 | -0.192621000 | -1.903800000 | 2.294602000  |

**65**  
E + ZPE = -2859.028496

|    |              |              |              |
|----|--------------|--------------|--------------|
| 28 | 0.720626000  | -1.202822000 | -0.109239000 |
| 15 | -1.589253000 | -0.404382000 | 0.191856000  |
| 6  | -2.913852000 | -1.132339000 | -0.959070000 |
| 1  | -3.526969000 | -0.271352000 | -1.251219000 |
| 6  | -3.767302000 | -2.035130000 | -0.042001000 |
| 1  | -4.733234000 | -2.248672000 | -0.513948000 |
| 1  | -3.267636000 | -3.003822000 | 0.102465000  |
| 6  | -3.928659000 | -1.325963000 | 1.308169000  |
| 1  | -4.385039000 | -1.979307000 | 2.060796000  |
| 1  | -4.592762000 | -0.458565000 | 1.202646000  |
| 6  | -2.525697000 | -0.875310000 | 1.767854000  |
| 1  | -2.006345000 | -1.780341000 | 2.108957000  |
| 6  | -2.490826000 | 0.139963000  | 2.912838000  |
| 1  | -2.993349000 | 1.074595000  | 2.648673000  |
| 1  | -1.464303000 | 0.384227000  | 3.208685000  |
| 1  | -2.997346000 | -0.276069000 | 3.790946000  |
| 6  | -2.426126000 | -1.814394000 | -2.240298000 |
| 1  | -1.784146000 | -2.677894000 | -2.038681000 |
| 1  | -1.873396000 | -1.125070000 | -2.886168000 |
| 1  | -3.286353000 | -2.176503000 | -2.814901000 |
| 6  | -1.768562000 | 1.418258000  | -0.055095000 |
| 6  | -3.028745000 | 2.030432000  | 0.061371000  |
| 1  | -3.900989000 | 1.432857000  | 0.304690000  |
| 6  | -3.195491000 | 3.401322000  | -0.128967000 |
| 1  | -4.180738000 | 3.845443000  | -0.023598000 |
| 6  | -2.096443000 | 4.190720000  | -0.462491000 |
| 1  | -2.213529000 | 5.258050000  | -0.623445000 |
| 6  | -0.844213000 | 3.596873000  | -0.606156000 |
| 1  | 0.010004000  | 4.209924000  | -0.882715000 |
| 6  | -0.660484000 | 2.224331000  | -0.397115000 |
| 6  | 0.745239000  | 1.684433000  | -0.516289000 |
| 1  | 1.174921000  | 1.438461000  | 0.458375000  |
| 1  | 1.402466000  | 2.428844000  | -0.976528000 |
| 8  | 0.852948000  | 0.462022000  | -1.289972000 |
| 6  | 0.508451000  | 0.620914000  | -2.678658000 |
| 1  | 1.194717000  | 1.339213000  | -3.139692000 |
| 1  | 0.621717000  | -0.353713000 | -3.151946000 |
| 1  | -0.521607000 | 0.973768000  | -2.784801000 |
| 1  | 2.695408000  | -1.012258000 | -2.526925000 |
| 6  | 2.942892000  | -1.842455000 | -1.860956000 |
| 6  | 2.614881000  | -1.569489000 | -0.399259000 |
| 1  | 4.018348000  | -2.035979000 | -1.977098000 |
| 1  | 2.418306000  | -2.731661000 | -2.227484000 |

|   |              |              |              |
|---|--------------|--------------|--------------|
| 1 | 2.859678000  | -2.461855000 | 0.181634000  |
| 6 | 3.242435000  | -0.375441000 | 0.239778000  |
| 6 | 3.215996000  | -0.231213000 | 1.645087000  |
| 6 | 3.871667000  | 0.643662000  | -0.504131000 |
| 1 | 2.779066000  | -1.014967000 | 2.257869000  |
| 1 | 3.940313000  | 0.558449000  | -1.583559000 |
| 6 | 3.773023000  | 0.882534000  | 2.273581000  |
| 6 | 4.441750000  | 1.748735000  | 0.123703000  |
| 1 | 3.743420000  | 0.960520000  | 3.356648000  |
| 1 | 4.942265000  | 2.506481000  | -0.473072000 |
| 6 | 4.386219000  | 1.880619000  | 1.514528000  |
| 1 | 4.831852000  | 2.743184000  | 2.001062000  |
| 6 | 0.321963000  | -3.156189000 | 0.020129000  |
| 6 | 0.612399000  | -2.639234000 | 1.279024000  |
| 1 | 1.060411000  | -3.735065000 | -0.527310000 |
| 1 | -0.709357000 | -3.329067000 | -0.276345000 |
| 1 | 1.578208000  | -2.819759000 | 1.738849000  |
| 1 | -0.179409000 | -2.407340000 | 1.984306000  |

66

E + ZPE = -2859.038148

|    |              |              |              |
|----|--------------|--------------|--------------|
| 28 | 0.970822000  | -0.499118000 | 0.963854000  |
| 15 | -0.923038000 | 0.841819000  | 0.255972000  |
| 6  | -1.644428000 | 2.230383000  | 1.285204000  |
| 1  | -2.591612000 | 2.496354000  | 0.798430000  |
| 6  | -0.675076000 | 3.383454000  | 0.961232000  |
| 1  | -1.043352000 | 4.325116000  | 1.384094000  |
| 1  | 0.314788000  | 3.202602000  | 1.401468000  |
| 6  | -0.587520000 | 3.446789000  | -0.571871000 |
| 1  | 0.228118000  | 4.095136000  | -0.909192000 |
| 1  | -1.518405000 | 3.880080000  | -0.959021000 |
| 6  | -0.418495000 | 2.014525000  | -1.159268000 |
| 1  | 0.645132000  | 1.822694000  | -1.326827000 |
| 6  | -1.159505000 | 1.827354000  | -2.487000000 |
| 1  | -2.239479000 | 1.967141000  | -2.372759000 |
| 1  | -0.994630000 | 0.836707000  | -2.923271000 |
| 1  | -0.801788000 | 2.568447000  | -3.211723000 |
| 6  | -1.940092000 | 1.953142000  | 2.760961000  |
| 1  | -1.046769000 | 1.702067000  | 3.337780000  |
| 1  | -2.654515000 | 1.130536000  | 2.876135000  |
| 1  | -2.386767000 | 2.841413000  | 3.221799000  |
| 6  | -2.345226000 | -0.192088000 | -0.309004000 |
| 6  | -3.677123000 | 0.155782000  | -0.041153000 |
| 1  | -3.911429000 | 1.062512000  | 0.504579000  |
| 6  | -4.737262000 | -0.647698000 | -0.467907000 |
| 1  | -5.758226000 | -0.349231000 | -0.249204000 |
| 6  | -4.482699000 | -1.821376000 | -1.171529000 |
| 1  | -5.300788000 | -2.449777000 | -1.510021000 |
| 6  | -3.162291000 | -2.192635000 | -1.428346000 |
| 1  | -2.958489000 | -3.115527000 | -1.965991000 |
| 6  | -2.092919000 | -1.398877000 | -1.004140000 |
| 6  | -0.684411000 | -1.860355000 | -1.284727000 |
| 1  | -0.103185000 | -1.120457000 | -1.839422000 |
| 1  | -0.693572000 | -2.789477000 | -1.866616000 |
| 8  | 0.088003000  | -2.098122000 | -0.079323000 |
| 6  | -0.425593000 | -3.194519000 | 0.703083000  |
| 1  | -0.515475000 | -4.083732000 | 0.069241000  |
| 1  | 0.293787000  | -3.383988000 | 1.497451000  |
| 1  | -1.401848000 | -2.947120000 | 1.130191000  |
| 6  | 1.383793000  | 0.479302000  | 2.654524000  |
| 6  | 0.769866000  | -0.752367000 | 2.917951000  |
| 1  | -0.289952000 | -0.801817000 | 3.162505000  |

|   |             |              |              |
|---|-------------|--------------|--------------|
| 1 | 2.326178000 | -3.217853000 | -0.047821000 |
| 1 | 0.823511000 | 1.404879000  | 2.712820000  |
| 1 | 2.448317000 | 0.601824000  | 2.831885000  |
| 6 | 2.743988000 | -1.266352000 | 0.874747000  |
| 6 | 2.941777000 | -2.763579000 | 0.730497000  |
| 1 | 3.346133000 | -0.896417000 | 1.705632000  |
| 1 | 3.992840000 | -2.972068000 | 0.487586000  |
| 1 | 2.729021000 | -3.276531000 | 1.674702000  |
| 6 | 2.872256000 | -0.392152000 | -0.310617000 |
| 6 | 3.315097000 | 0.947371000  | -0.157258000 |
| 1 | 3.576247000 | 1.307321000  | 0.833450000  |
| 6 | 2.590105000 | -0.838415000 | -1.625583000 |
| 1 | 2.287378000 | -1.867686000 | -1.783850000 |
| 6 | 2.752463000 | 0.003361000  | -2.722956000 |
| 6 | 3.476484000 | 1.786742000  | -1.255606000 |
| 6 | 3.196846000 | 1.317060000  | -2.542847000 |
| 1 | 3.841720000 | 2.799456000  | -1.112312000 |
| 1 | 2.554611000 | -0.370456000 | -3.723473000 |
| 1 | 3.338130000 | 1.966141000  | -3.402159000 |
| 1 | 1.362694000 | -1.584412000 | 3.290680000  |

67

E + ZPE = -2859.034363

|    |              |              |              |
|----|--------------|--------------|--------------|
| 28 | 1.003998000  | -0.565375000 | 0.900200000  |
| 15 | -0.682173000 | 0.947496000  | 0.213272000  |
| 6  | -1.065200000 | 2.436840000  | 1.288023000  |
| 1  | -2.045327000 | 2.800539000  | 0.951022000  |
| 6  | -0.003852000 | 3.435339000  | 0.791903000  |
| 1  | -0.183323000 | 4.428644000  | 1.218898000  |
| 1  | 0.988635000  | 3.117049000  | 1.138215000  |
| 6  | -0.071905000 | 3.460890000  | -0.741184000 |
| 1  | 0.835672000  | 3.890665000  | -1.177903000 |
| 1  | -0.903311000 | 4.107041000  | -1.046411000 |
| 6  | -0.325581000 | 2.029242000  | -1.310470000 |
| 1  | 0.598102000  | 1.643089000  | -1.749416000 |
| 6  | -1.413883000 | 2.056189000  | -2.392906000 |
| 1  | -2.376452000 | 2.388111000  | -1.989947000 |
| 1  | -1.571765000 | 1.087987000  | -2.874822000 |
| 1  | -1.118886000 | 2.766238000  | -3.174749000 |
| 6  | -1.096261000 | 2.271985000  | 2.808301000  |
| 1  | -0.094520000 | 2.091397000  | 3.211457000  |
| 1  | -1.752970000 | 1.458014000  | 3.133591000  |
| 1  | -1.465098000 | 3.194432000  | 3.270653000  |
| 6  | -2.264321000 | 0.060456000  | -0.109018000 |
| 6  | -3.437720000 | 0.401321000  | 0.578070000  |
| 1  | -3.432972000 | 1.200771000  | 1.311260000  |
| 6  | -4.639713000 | -0.267795000 | 0.332044000  |
| 1  | -5.535284000 | 0.017686000  | 0.875874000  |
| 6  | -4.685307000 | -1.285463000 | -0.616069000 |
| 1  | -5.616882000 | -1.803108000 | -0.823793000 |
| 6  | -3.520282000 | -1.640709000 | -1.299025000 |
| 1  | -3.554888000 | -2.435316000 | -2.040593000 |
| 6  | -2.304667000 | -0.995368000 | -1.052725000 |
| 6  | -1.060247000 | -1.469334000 | -1.779131000 |
| 1  | -0.450927000 | -0.638114000 | -2.140568000 |
| 1  | -1.344373000 | -2.075263000 | -2.650293000 |
| 8  | -0.176151000 | -2.228653000 | -0.941969000 |
| 6  | -0.667272000 | -3.542820000 | -0.674002000 |
| 1  | -0.840453000 | -4.084904000 | -1.613551000 |
| 1  | 0.100454000  | -4.064058000 | -0.101362000 |
| 1  | -1.599559000 | -3.520071000 | -0.097170000 |
| 1  | 3.815458000  | -3.314664000 | 0.547669000  |

|   |              |              |              |
|---|--------------|--------------|--------------|
| 6 | 2.766409000  | -3.020798000 | 0.690260000  |
| 6 | 2.675827000  | -1.539825000 | 0.977808000  |
| 1 | 2.388769000  | -3.607983000 | 1.534058000  |
| 1 | 2.214181000  | -3.316864000 | -0.204883000 |
| 1 | 3.181417000  | -1.275604000 | 1.908617000  |
| 6 | 2.895453000  | -0.548546000 | -0.069150000 |
| 6 | 3.018710000  | 0.809756000  | 0.334374000  |
| 6 | 2.872900000  | -0.826991000 | -1.465188000 |
| 1 | 3.119501000  | 1.041418000  | 1.392152000  |
| 1 | 2.753983000  | -1.850323000 | -1.802866000 |
| 6 | 3.216817000  | 1.825537000  | -0.610042000 |
| 6 | 3.067847000  | 0.187224000  | -2.389500000 |
| 1 | 3.374560000  | 2.847077000  | -0.277490000 |
| 1 | 3.096982000  | -0.048838000 | -3.449269000 |
| 6 | 3.255831000  | 1.514736000  | -1.965210000 |
| 1 | 3.439578000  | 2.294878000  | -2.698286000 |
| 6 | 0.653520000  | -0.849877000 | 2.878128000  |
| 6 | -0.090203000 | -1.739858000 | 2.117814000  |
| 1 | 0.196243000  | 0.042569000  | 3.288022000  |
| 1 | 1.555934000  | -1.175566000 | 3.390165000  |
| 1 | -1.144825000 | -1.561209000 | 1.926810000  |
| 1 | 0.229801000  | -2.771205000 | 2.007374000  |

68  
E + ZPE = -2859.034096

|    |              |              |              |
|----|--------------|--------------|--------------|
| 28 | 0.869260000  | -0.839722000 | 0.582004000  |
| 15 | -0.506101000 | 0.997665000  | 0.094123000  |
| 6  | -0.302236000 | 2.529135000  | 1.164434000  |
| 1  | -1.203301000 | 3.135309000  | 0.996714000  |
| 6  | 0.875682000  | 3.205841000  | 0.436615000  |
| 1  | 1.048269000  | 4.207441000  | 0.846511000  |
| 1  | 1.792897000  | 2.628871000  | 0.615098000  |
| 6  | 0.550833000  | 3.260839000  | -1.063959000 |
| 1  | 1.463413000  | 3.348252000  | -1.661208000 |
| 1  | -0.048437000 | 4.154567000  | -1.270119000 |
| 6  | -0.273381000 | 2.006337000  | -1.499988000 |
| 1  | 0.319037000  | 1.392730000  | -2.182494000 |
| 6  | -1.572236000 | 2.425339000  | -2.204954000 |
| 1  | -2.219129000 | 3.013024000  | -1.544571000 |
| 1  | -2.158416000 | 1.580477000  | -2.574438000 |
| 1  | -1.321486000 | 3.055355000  | -3.066529000 |
| 6  | -0.067546000 | 2.395138000  | 2.669543000  |
| 1  | 0.848312000  | 1.836225000  | 2.887735000  |
| 1  | -0.901415000 | 1.913460000  | 3.191105000  |
| 1  | 0.048836000  | 3.394133000  | 3.104934000  |
| 6  | -2.259510000 | 0.445588000  | 0.125401000  |
| 6  | -3.151801000 | 0.939064000  | 1.086473000  |
| 1  | -2.828079000 | 1.690343000  | 1.799741000  |
| 6  | -4.473967000 | 0.489242000  | 1.141230000  |
| 1  | -5.148485000 | 0.889202000  | 1.892456000  |
| 6  | -4.921180000 | -0.459322000 | 0.226308000  |
| 1  | -5.948745000 | -0.808952000 | 0.254438000  |
| 6  | -4.039270000 | -0.959261000 | -0.734841000 |
| 1  | -4.393726000 | -1.690861000 | -1.457068000 |
| 6  | -2.708437000 | -0.534246000 | -0.796897000 |
| 6  | -1.792658000 | -1.134567000 | -1.850057000 |
| 1  | -1.178034000 | -0.372609000 | -2.334099000 |
| 1  | -2.394885000 | -1.612902000 | -2.633846000 |
| 8  | -0.854207000 | -2.087298000 | -1.328134000 |
| 6  | -1.434182000 | -3.373538000 | -1.111833000 |
| 1  | -1.850142000 | -3.769693000 | -2.047872000 |
| 1  | -0.634498000 | -4.032135000 | -0.771418000 |

|   |              |              |              |
|---|--------------|--------------|--------------|
| 1 | -2.226870000 | -3.341767000 | -0.353673000 |
| 1 | 3.102067000  | -3.970379000 | -0.096683000 |
| 6 | 2.127708000  | -3.473324000 | 0.005068000  |
| 6 | 2.314443000  | -2.149160000 | 0.723718000  |
| 1 | 1.484717000  | -4.152323000 | 0.574140000  |
| 1 | 1.707742000  | -3.368100000 | -0.998345000 |
| 1 | 2.688276000  | -2.285115000 | 1.740425000  |
| 6 | 2.892592000  | -1.011506000 | 0.040873000  |
| 6 | 3.840907000  | -0.132633000 | 0.643804000  |
| 6 | 2.321059000  | -0.629924000 | -1.205659000 |
| 1 | 4.252067000  | -0.392685000 | 1.615445000  |
| 1 | 1.675608000  | -1.320053000 | -1.745090000 |
| 6 | 4.290884000  | 0.984726000  | -0.030547000 |
| 6 | 2.815889000  | 0.502722000  | -1.889550000 |
| 1 | 5.054590000  | 1.614357000  | 0.416790000  |
| 1 | 2.452543000  | 0.724784000  | -2.888408000 |
| 6 | 3.791852000  | 1.296228000  | -1.315053000 |
| 1 | 4.189990000  | 2.150895000  | -1.853939000 |
| 6 | 0.319110000  | -1.022019000 | 2.540490000  |
| 6 | -0.344697000 | -1.963116000 | 1.776825000  |
| 1 | -0.196838000 | -0.124206000 | 2.856741000  |
| 1 | 1.194943000  | -1.283318000 | 3.128109000  |
| 1 | -1.369619000 | -1.788383000 | 1.464463000  |
| 1 | -0.014467000 | -2.995826000 | 1.747429000  |

69  
E + ZPE = -2859.026836

|    |              |              |              |
|----|--------------|--------------|--------------|
| 28 | -0.951852000 | -0.096257000 | 0.564844000  |
| 15 | 0.971985000  | 0.719068000  | -0.152976000 |
| 6  | 1.132246000  | 1.528153000  | -1.854897000 |
| 1  | 2.151491000  | 1.286535000  | -2.180244000 |
| 6  | 1.095100000  | 3.037678000  | -1.551400000 |
| 1  | 1.437962000  | 3.609489000  | -2.421465000 |
| 1  | 0.066286000  | 3.362725000  | -1.345111000 |
| 6  | 1.986864000  | 3.274882000  | -0.325606000 |
| 1  | 1.893806000  | 4.296489000  | 0.059976000  |
| 1  | 3.040263000  | 3.140239000  | -0.605921000 |
| 6  | 1.602617000  | 2.253026000  | 0.770601000  |
| 1  | 0.695956000  | 2.623497000  | 1.264390000  |
| 6  | 2.677474000  | 2.056431000  | 1.844395000  |
| 1  | 3.608311000  | 1.659019000  | 1.430768000  |
| 1  | 2.353229000  | 1.382613000  | 2.642800000  |
| 1  | 2.906974000  | 3.023585000  | 2.306418000  |
| 6  | 0.173173000  | 1.050317000  | -2.942720000 |
| 1  | -0.872859000 | 1.189019000  | -2.661645000 |
| 1  | 0.321559000  | -0.010099000 | -3.172541000 |
| 1  | 0.351588000  | 1.611174000  | -3.867500000 |
| 6  | 2.306726000  | -0.568223000 | -0.188274000 |
| 6  | 3.602533000  | -0.167494000 | -0.567741000 |
| 1  | 3.798645000  | 0.875631000  | -0.793262000 |
| 6  | 4.658188000  | -1.069966000 | -0.664254000 |
| 1  | 5.645402000  | -0.719240000 | -0.949396000 |
| 6  | 4.432693000  | -2.420362000 | -0.404273000 |
| 1  | 5.239598000  | -3.141783000 | -0.488972000 |
| 6  | 3.155341000  | -2.841828000 | -0.047653000 |
| 1  | 2.978253000  | -3.897702000 | 0.142694000  |
| 6  | 2.088525000  | -1.939855000 | 0.080275000  |
| 6  | 0.789344000  | -2.538852000 | 0.588431000  |
| 1  | 0.704349000  | -2.422087000 | 1.670256000  |
| 1  | 0.776878000  | -3.614443000 | 0.380999000  |
| 8  | -0.422076000 | -1.977906000 | 0.052497000  |
| 6  | -0.686415000 | -2.400145000 | -1.301777000 |

|   |              |              |              |
|---|--------------|--------------|--------------|
| 1 | -0.759831000 | -3.492105000 | -1.325430000 |
| 1 | -1.637423000 | -1.959597000 | -1.594471000 |
| 1 | 0.112730000  | -2.065823000 | -1.970321000 |
| 1 | -3.069259000 | 2.964180000  | 1.748996000  |
| 6 | -2.301457000 | 2.196161000  | 1.913868000  |
| 6 | -1.923067000 | 1.557274000  | 0.586408000  |
| 1 | -2.708913000 | 1.487965000  | 2.640910000  |
| 1 | -1.445151000 | 2.698046000  | 2.378062000  |
| 1 | -1.545702000 | 2.316581000  | -0.102552000 |
| 6 | -2.850690000 | 0.632882000  | -0.077187000 |
| 6 | -3.308959000 | -0.499154000 | 0.646003000  |
| 6 | -3.198013000 | 0.725027000  | -1.455668000 |
| 1 | -3.271342000 | -0.509100000 | 1.725830000  |
| 1 | -2.902805000 | 1.611482000  | -2.009418000 |
| 6 | -4.053946000 | -1.507781000 | -0.000227000 |
| 6 | -3.951194000 | -0.257182000 | -2.069023000 |
| 1 | -4.420260000 | -2.352254000 | 0.576297000  |
| 1 | -4.238009000 | -0.147220000 | -3.111042000 |
| 6 | -4.367619000 | -1.394922000 | -1.344149000 |
| 1 | -4.964935000 | -2.158590000 | -1.833628000 |
| 6 | -0.038326000 | -0.173472000 | 2.883744000  |
| 6 | -1.112535000 | -0.967576000 | 3.043947000  |
| 1 | -0.083511000 | 0.883600000  | 3.123027000  |
| 1 | 0.950461000  | -0.573729000 | 2.681716000  |
| 1 | -2.049814000 | -0.569533000 | 3.417032000  |
| 1 | -1.066856000 | -2.046248000 | 2.924852000  |

70  
E + ZPE = -2859.035325

|    |              |              |              |
|----|--------------|--------------|--------------|
| 28 | -0.554338000 | -0.935454000 | 0.021847000  |
| 15 | 1.044642000  | 0.754997000  | -0.031089000 |
| 6  | 0.853594000  | 1.914538000  | -1.510452000 |
| 1  | 1.859077000  | 2.040086000  | -1.926680000 |
| 6  | 0.414427000  | 3.257096000  | -0.882725000 |
| 1  | 0.601022000  | 4.080548000  | -1.581355000 |
| 1  | -0.667929000 | 3.241705000  | -0.694344000 |
| 6  | 1.170274000  | 3.440163000  | 0.438514000  |
| 1  | 0.792755000  | 4.295613000  | 1.010309000  |
| 1  | 2.232558000  | 3.636183000  | 0.241208000  |
| 6  | 1.023994000  | 2.138785000  | 1.257919000  |
| 1  | 0.009024000  | 2.115677000  | 1.673130000  |
| 6  | 2.013823000  | 1.994925000  | 2.417072000  |
| 1  | 3.051459000  | 2.004881000  | 2.071007000  |
| 1  | 1.855442000  | 1.070104000  | 2.983410000  |
| 1  | 1.884858000  | 2.830150000  | 3.114538000  |
| 6  | -0.060788000 | 1.407625000  | -2.628515000 |
| 1  | -1.079235000 | 1.226983000  | -2.270484000 |
| 1  | 0.313859000  | 0.478556000  | -3.072208000 |
| 1  | -0.115892000 | 2.153476000  | -3.429761000 |
| 6  | 2.787859000  | 0.144931000  | -0.079820000 |
| 6  | 3.834082000  | 0.971173000  | -0.520472000 |
| 1  | 3.628443000  | 1.976835000  | -0.871863000 |
| 6  | 5.159828000  | 0.535129000  | -0.506033000 |
| 1  | 5.948161000  | 1.198238000  | -0.849396000 |
| 6  | 5.464661000  | -0.745482000 | -0.050474000 |
| 1  | 6.492341000  | -1.095376000 | -0.038569000 |
| 6  | 4.436752000  | -1.581316000 | 0.384889000  |
| 1  | 4.671332000  | -2.583774000 | 0.734341000  |
| 6  | 3.105653000  | -1.151855000 | 0.382714000  |
| 6  | 2.037424000  | -2.099746000 | 0.870913000  |
| 1  | 1.509793000  | -1.719171000 | 1.750849000  |
| 1  | 2.474617000  | -3.066549000 | 1.143442000  |

|   |              |              |              |
|---|--------------|--------------|--------------|
| 8 | 1.002584000  | -2.335077000 | -0.113050000 |
| 6 | 1.470337000  | -3.067583000 | -1.262212000 |
| 1 | 2.003929000  | -3.963464000 | -0.928480000 |
| 1 | 0.593167000  | -3.368384000 | -1.833927000 |
| 1 | 2.131002000  | -2.449867000 | -1.878113000 |
| 1 | -0.544961000 | -0.080105000 | 2.577379000  |
| 6 | -1.592375000 | -0.238402000 | 2.292937000  |
| 6 | -1.885124000 | 0.206251000  | 0.853279000  |
| 1 | -2.197968000 | 0.347074000  | 2.998109000  |
| 1 | -1.829136000 | -1.292031000 | 2.476965000  |
| 1 | -1.526163000 | 1.227151000  | 0.703276000  |
| 6 | -3.326636000 | 0.200756000  | 0.454785000  |
| 6 | -4.298634000 | -0.606300000 | 1.073782000  |
| 6 | -3.760128000 | 1.076323000  | -0.560017000 |
| 1 | -4.019848000 | -1.270386000 | 1.887126000  |
| 1 | -3.035920000 | 1.734705000  | -1.035897000 |
| 6 | -5.638148000 | -0.548473000 | 0.686983000  |
| 6 | -5.094676000 | 1.133004000  | -0.953240000 |
| 1 | -6.368504000 | -1.175794000 | 1.190028000  |
| 1 | -5.398799000 | 1.822529000  | -1.735677000 |
| 6 | -6.041806000 | 0.315448000  | -0.331496000 |
| 1 | -7.084751000 | 0.360245000  | -0.630493000 |
| 6 | -1.716034000 | -1.737254000 | -1.422306000 |
| 6 | -1.833872000 | -2.514897000 | -0.285637000 |
| 1 | -1.045384000 | -2.016505000 | -2.233343000 |
| 1 | -2.495450000 | -1.031664000 | -1.690226000 |
| 1 | -1.244804000 | -3.418760000 | -0.158207000 |
| 1 | -2.713847000 | -2.429572000 | 0.340607000  |

71  
E + ZPE = -2859.021446

|    |              |              |              |
|----|--------------|--------------|--------------|
| 28 | 0.552178000  | -1.115404000 | 0.478031000  |
| 15 | -0.891749000 | 0.709388000  | 0.344756000  |
| 6  | -1.449085000 | 1.311798000  | 2.054174000  |
| 1  | -2.480494000 | 1.648421000  | 1.893280000  |
| 6  | -0.580480000 | 2.559707000  | 2.300823000  |
| 1  | -0.985587000 | 3.148393000  | 3.132005000  |
| 1  | 0.438201000  | 2.261633000  | 2.585884000  |
| 6  | -0.549926000 | 3.357495000  | 0.990876000  |
| 1  | 0.164746000  | 4.187374000  | 1.031882000  |
| 1  | -1.537205000 | 3.799780000  | 0.801667000  |
| 6  | -0.175348000 | 2.384687000  | -0.149541000 |
| 1  | 0.904041000  | 2.202499000  | -0.077935000 |
| 6  | -0.483196000 | 2.889109000  | -1.562018000 |
| 1  | -1.550896000 | 3.073622000  | -1.710778000 |
| 1  | -0.161083000 | 2.179978000  | -2.333095000 |
| 1  | 0.044859000  | 3.833007000  | -1.740243000 |
| 6  | -1.468940000 | 0.291023000  | 3.192680000  |
| 1  | -0.464320000 | -0.044932000 | 3.464802000  |
| 1  | -2.073494000 | -0.588599000 | 2.943965000  |
| 1  | -1.909819000 | 0.744141000  | 4.087783000  |
| 6  | -2.505172000 | 0.423185000  | -0.511827000 |
| 6  | -3.466590000 | 1.448494000  | -0.539091000 |
| 1  | -3.243424000 | 2.414043000  | -0.095876000 |
| 6  | -4.718282000 | 1.262856000  | -1.124591000 |
| 1  | -5.435237000 | 2.078298000  | -1.136693000 |
| 6  | -5.042964000 | 0.027997000  | -1.681991000 |
| 1  | -6.018474000 | -0.135015000 | -2.129882000 |
| 6  | -4.106332000 | -1.003725000 | -1.654519000 |
| 1  | -4.360386000 | -1.967765000 | -2.088140000 |
| 6  | -2.837777000 | -0.823980000 | -1.089015000 |
| 6  | -1.853803000 | -1.967785000 | -1.196165000 |

|   |              |              |              |
|---|--------------|--------------|--------------|
| 1 | -1.032087000 | -1.705275000 | -1.867892000 |
| 1 | -2.347224000 | -2.850829000 | -1.618147000 |
| 8 | -1.220652000 | -2.349251000 | 0.043253000  |
| 6 | -2.055857000 | -3.145248000 | 0.899072000  |
| 1 | -2.337193000 | -4.073543000 | 0.389224000  |
| 1 | -1.468350000 | -3.383134000 | 1.786731000  |
| 1 | -2.957053000 | -2.592850000 | 1.186694000  |
| 1 | 0.834292000  | -2.707394000 | -1.608680000 |
| 6 | 1.779986000  | -2.159992000 | -1.671991000 |
| 6 | 1.727502000  | -0.764482000 | -1.045029000 |
| 1 | 2.013043000  | -2.048491000 | -2.740513000 |
| 1 | 2.554529000  | -2.792954000 | -1.236993000 |
| 1 | 1.074674000  | -0.113602000 | -1.636502000 |
| 6 | 3.041094000  | -0.091039000 | -0.884991000 |
| 6 | 4.188198000  | -0.753889000 | -0.401718000 |
| 6 | 3.184834000  | 1.254360000  | -1.278505000 |
| 1 | 4.128816000  | -1.794576000 | -0.097494000 |
| 1 | 2.332252000  | 1.777300000  | -1.702882000 |
| 6 | 5.411556000  | -0.097623000 | -0.302805000 |
| 6 | 4.409585000  | 1.912520000  | -1.186723000 |
| 1 | 6.279249000  | -0.631944000 | 0.072948000  |
| 1 | 4.493499000  | 2.945224000  | -1.512590000 |
| 6 | 5.527772000  | 1.240330000  | -0.691768000 |
| 1 | 6.484425000  | 1.748864000  | -0.618543000 |
| 6 | 1.864671000  | -1.114480000 | 1.982472000  |
| 6 | 1.634026000  | -2.420824000 | 1.553422000  |
| 1 | 1.351589000  | -0.734858000 | 2.864143000  |
| 1 | 2.782274000  | -0.594872000 | 1.731647000  |
| 1 | 0.932670000  | -3.057853000 | 2.093269000  |
| 1 | 2.376781000  | -2.962571000 | 0.977331000  |

72

E + ZPE = -2859.027808

|    |              |              |              |
|----|--------------|--------------|--------------|
| 28 | 0.750433000  | -0.417682000 | 0.655705000  |
| 15 | -1.270319000 | 0.772652000  | 0.210310000  |
| 6  | -2.077522000 | 1.841572000  | 1.550119000  |
| 1  | -3.150960000 | 1.637493000  | 1.475227000  |
| 6  | -1.824465000 | 3.298225000  | 1.096627000  |
| 1  | -2.547026000 | 3.972542000  | 1.570392000  |
| 1  | -0.828916000 | 3.623838000  | 1.428685000  |
| 6  | -1.903795000 | 3.354036000  | -0.434312000 |
| 1  | -1.563670000 | 4.320300000  | -0.824674000 |
| 1  | -2.942944000 | 3.229332000  | -0.766028000 |
| 6  | -1.035783000 | 2.208590000  | -0.997776000 |
| 1  | 0.018779000  | 2.484574000  | -0.866484000 |
| 6  | -1.266889000 | 1.885052000  | -2.475485000 |
| 1  | -2.298665000 | 1.575553000  | -2.668087000 |
| 1  | -0.602656000 | 1.087854000  | -2.829179000 |
| 1  | -1.064188000 | 2.773019000  | -3.084727000 |
| 6  | -1.647196000 | 1.542032000  | 2.989416000  |
| 1  | -0.585277000 | 1.750140000  | 3.153977000  |
| 1  | -1.839791000 | 0.499054000  | 3.264502000  |
| 1  | -2.212766000 | 2.172545000  | 3.684816000  |
| 6  | -2.645462000 | -0.277097000 | -0.446201000 |
| 6  | -3.939195000 | 0.251109000  | -0.598265000 |
| 1  | -4.138408000 | 1.285798000  | -0.340098000 |
| 6  | -4.993675000 | -0.519405000 | -1.087323000 |
| 1  | -5.979000000 | -0.076825000 | -1.198303000 |
| 6  | -4.776216000 | -1.853162000 | -1.424650000 |
| 1  | -5.590270000 | -2.468376000 | -1.795503000 |
| 6  | -3.501776000 | -2.397165000 | -1.276448000 |
| 1  | -3.332405000 | -3.438737000 | -1.538063000 |

|   |              |              |              |
|---|--------------|--------------|--------------|
| 6 | -2.429922000 | -1.628205000 | -0.806440000 |
| 6 | -1.071670000 | -2.295126000 | -0.772083000 |
| 1 | -0.409212000 | -1.897254000 | -1.547414000 |
| 1 | -1.177664000 | -3.370402000 | -0.952697000 |
| 8 | -0.331621000 | -2.129353000 | 0.459216000  |
| 6 | -0.973520000 | -2.696803000 | 1.616926000  |
| 1 | -1.232494000 | -3.740311000 | 1.409974000  |
| 1 | -0.248858000 | -2.653300000 | 2.430359000  |
| 1 | -1.875826000 | -2.136167000 | 1.880453000  |
| 1 | 1.893913000  | -3.231626000 | 1.205452000  |
| 6 | 2.746257000  | -2.625218000 | 0.888024000  |
| 6 | 2.303124000  | -1.444129000 | 0.036613000  |
| 1 | 3.412717000  | -3.276072000 | 0.305830000  |
| 1 | 3.297440000  | -2.331167000 | 1.786273000  |
| 1 | 1.693175000  | -1.816483000 | -0.804586000 |
| 6 | 3.371189000  | -0.580926000 | -0.521713000 |
| 6 | 4.588793000  | -0.337241000 | 0.143359000  |
| 6 | 3.165793000  | 0.052331000  | -1.766221000 |
| 1 | 4.798145000  | -0.823680000 | 1.091318000  |
| 1 | 2.249830000  | -0.149935000 | -2.319427000 |
| 6 | 5.547471000  | 0.512604000  | -0.404564000 |
| 6 | 4.122434000  | 0.902240000  | -2.315401000 |
| 1 | 6.481372000  | 0.680644000  | 0.124094000  |
| 1 | 3.943724000  | 1.367822000  | -3.280449000 |
| 6 | 5.317764000  | 1.139808000  | -1.632339000 |
| 1 | 6.069857000  | 1.796918000  | -2.058711000 |
| 6 | 1.659728000  | 1.254678000  | 1.298223000  |
| 6 | 1.791958000  | 0.220503000  | 2.226526000  |
| 1 | 0.937386000  | 2.047775000  | 1.464181000  |
| 1 | 2.492091000  | 1.527055000  | 0.658570000  |
| 1 | 1.124222000  | 0.159211000  | 3.086355000  |
| 1 | 2.739432000  | -0.290826000 | 2.346180000  |

73

E + ZPE = -2859.027339

|    |              |              |              |
|----|--------------|--------------|--------------|
| 28 | 0.797558000  | -0.532788000 | 0.732018000  |
| 15 | -1.180201000 | 0.745638000  | 0.298573000  |
| 6  | -2.038682000 | 1.729571000  | 1.673663000  |
| 1  | -3.109644000 | 1.558364000  | 1.521302000  |
| 6  | -1.730081000 | 3.209337000  | 1.348145000  |
| 1  | -2.458995000 | 3.864556000  | 1.838778000  |
| 1  | -0.744396000 | 3.480717000  | 1.750592000  |
| 6  | -1.734155000 | 3.383163000  | -0.175503000 |
| 1  | -1.357382000 | 4.368187000  | -0.474719000 |
| 1  | -2.758523000 | 3.306875000  | -0.563145000 |
| 6  | -0.861118000 | 2.264772000  | -0.782598000 |
| 1  | 0.190855000  | 2.506768000  | -0.579859000 |
| 6  | -1.026738000 | 2.058348000  | -2.289527000 |
| 1  | -2.051266000 | 1.776214000  | -2.550928000 |
| 1  | -0.353010000 | 1.282844000  | -2.671406000 |
| 1  | -0.788976000 | 2.987925000  | -2.818760000 |
| 6  | -1.705097000 | 1.315018000  | 3.109753000  |
| 1  | -0.657009000 | 1.503694000  | 3.362106000  |
| 1  | -1.918287000 | 0.255340000  | 3.288521000  |
| 1  | -2.315766000 | 1.893236000  | 3.812444000  |
| 6  | -2.542514000 | -0.222332000 | -0.499058000 |
| 6  | -3.817215000 | 0.345360000  | -0.669528000 |
| 1  | -4.007540000 | 1.363332000  | -0.345979000 |
| 6  | -4.863763000 | -0.362235000 | -1.260147000 |
| 1  | -5.833459000 | 0.110927000  | -1.382194000 |
| 6  | -4.658492000 | -1.672755000 | -1.684372000 |
| 1  | -5.467021000 | -2.240310000 | -2.134776000 |



|   |              |              |              |
|---|--------------|--------------|--------------|
| 6 | -3.402946000 | -2.255085000 | -1.521545000 |
| 1 | -3.242477000 | -3.278232000 | -1.852466000 |
| 6 | -2.337762000 | -1.547825000 | -0.949983000 |
| 6 | -0.995507000 | -2.246058000 | -0.914590000 |
| 1 | -0.291589000 | -1.798711000 | -1.623833000 |
| 1 | -1.114764000 | -3.298800000 | -1.193361000 |
| 8 | -0.306063000 | -2.203918000 | 0.355289000  |
| 6 | -0.993803000 | -2.878914000 | 1.425171000  |
| 1 | -1.242790000 | -3.896880000 | 1.107879000  |
| 1 | -0.303071000 | -2.916243000 | 2.267787000  |
| 1 | -1.907116000 | -2.344228000 | 1.704777000  |
| 6 | 1.691649000  | 1.017503000  | 1.654016000  |
| 6 | 1.653852000  | -0.108423000 | 2.478584000  |
| 1 | 2.307502000  | -3.215627000 | 1.463859000  |
| 6 | 3.043081000  | -2.573218000 | 0.968893000  |
| 6 | 2.365436000  | -1.528824000 | 0.096667000  |
| 1 | 3.676389000  | -3.221119000 | 0.347514000  |
| 1 | 3.690247000  | -2.151824000 | 1.743691000  |
| 1 | 1.755230000  | -2.053363000 | -0.651508000 |
| 6 | 3.220663000  | -0.541313000 | -0.599353000 |
| 6 | 4.450948000  | -0.084633000 | -0.083154000 |
| 6 | 2.783346000  | 0.002303000  | -1.827069000 |
| 1 | 4.831703000  | -0.491864000 | 0.848560000  |
| 1 | 1.867893000  | -0.375682000 | -2.279757000 |
| 6 | 5.196787000  | 0.878178000  | -0.756919000 |
| 6 | 3.526073000  | 0.971623000  | -2.499534000 |
| 1 | 6.146760000  | 1.207179000  | -0.345488000 |
| 1 | 3.172731000  | 1.363331000  | -3.449137000 |
| 6 | 4.735535000  | 1.416242000  | -1.963930000 |
| 1 | 5.324352000  | 2.163047000  | -2.488085000 |
| 1 | 0.985159000  | 1.828158000  | 1.801988000  |
| 1 | 2.611560000  | 1.307276000  | 1.158525000  |
| 1 | 0.873881000  | -0.216062000 | 3.232074000  |
| 1 | 2.551742000  | -0.683015000 | 2.669103000  |

74

E + ZPE = -2859.038666

|    |              |              |              |
|----|--------------|--------------|--------------|
| 28 | 0.938441000  | -0.656345000 | 0.795956000  |
| 15 | -0.886163000 | 0.825597000  | 0.302494000  |
| 6  | -1.448611000 | 2.185681000  | 1.461274000  |
| 1  | -2.401022000 | 2.543787000  | 1.047912000  |
| 6  | -0.414267000 | 3.283673000  | 1.150428000  |
| 1  | -0.680763000 | 4.218160000  | 1.657261000  |
| 1  | 0.581399000  | 2.996861000  | 1.515558000  |
| 6  | -0.412471000 | 3.451182000  | -0.377447000 |
| 1  | 0.442539000  | 4.041589000  | -0.723047000 |
| 1  | -1.316203000 | 3.999897000  | -0.670513000 |
| 6  | -0.426340000 | 2.057404000  | -1.075965000 |
| 1  | 0.593607000  | 1.797908000  | -1.374240000 |
| 6  | -1.317811000 | 2.034380000  | -2.322537000 |
| 1  | -2.362598000 | 2.253015000  | -2.077712000 |
| 1  | -1.291693000 | 1.070404000  | -2.840701000 |
| 1  | -0.974141000 | 2.797785000  | -3.030662000 |
| 6  | -1.678351000 | 1.845261000  | 2.935669000  |
| 1  | -0.767680000 | 1.530191000  | 3.450628000  |
| 1  | -2.422459000 | 1.050023000  | 3.053823000  |
| 1  | -2.058565000 | 2.728841000  | 3.460793000  |
| 6  | -2.397449000 | -0.103568000 | -0.203755000 |
| 6  | -3.679301000 | 0.263110000  | 0.230591000  |
| 1  | -3.818307000 | 1.126421000  | 0.871088000  |
| 6  | -4.809486000 | -0.465311000 | -0.149137000 |
| 1  | -5.789936000 | -0.154379000 | 0.199168000  |

|   |              |              |              |
|---|--------------|--------------|--------------|
| 6 | -4.676289000 | -1.579865000 | -0.972144000 |
| 1 | -5.549827000 | -2.149126000 | -1.274827000 |
| 6 | -3.405443000 | -1.968447000 | -1.398380000 |
| 1 | -3.296188000 | -2.843983000 | -2.033888000 |
| 6 | -2.266780000 | -1.250266000 | -1.023065000 |
| 6 | -0.913759000 | -1.723854000 | -1.493645000 |
| 1 | -0.357285000 | -0.945374000 | -2.021208000 |
| 1 | -1.019282000 | -2.580249000 | -2.169563000 |
| 8 | -0.037093000 | -2.117419000 | -0.407500000 |
| 6 | -0.466474000 | -3.322261000 | 0.253774000  |
| 1 | -0.623710000 | -4.111808000 | -0.489452000 |
| 1 | 0.334285000  | -3.614450000 | 0.932359000  |
| 1 | -1.390259000 | -3.154497000 | 0.816008000  |
| 6 | 1.450699000  | 0.046914000  | 2.589002000  |
| 6 | 0.662592000  | -1.105080000 | 2.707323000  |
| 1 | -0.395961000 | -1.031004000 | 2.949501000  |
| 1 | 4.499335000  | -2.436673000 | 1.046035000  |
| 1 | 1.027212000  | 1.031191000  | 2.752784000  |
| 1 | 2.515997000  | -0.008900000 | 2.778924000  |
| 6 | 2.598658000  | -1.602352000 | 0.506549000  |
| 6 | 3.704251000  | -1.843146000 | 1.516767000  |
| 1 | 2.295767000  | -2.550156000 | 0.054411000  |
| 1 | 4.174634000  | -0.930530000 | 1.891226000  |
| 1 | 3.350014000  | -2.419638000 | 2.378666000  |
| 6 | 2.779324000  | -0.554762000 | -0.523153000 |
| 6 | 3.325174000  | 0.717941000  | -0.213905000 |
| 1 | 3.634075000  | 0.937838000  | -0.802537000 |
| 6 | 2.422639000  | -0.800619000 | -1.873033000 |
| 1 | 2.034271000  | -1.779223000 | -2.138948000 |
| 6 | 2.619011000  | 0.159465000  | -2.861421000 |
| 6 | 3.513022000  | 1.679854000  | -1.203188000 |
| 6 | 3.166629000  | 1.403006000  | -2.529351000 |
| 1 | 3.948826000  | 2.640311000  | -0.944127000 |
| 1 | 2.366654000  | -0.066142000 | -3.893538000 |
| 1 | 3.332275000  | 2.148390000  | -3.301823000 |
| 1 | 1.122822000  | -2.053443000 | 2.973883000  |

75

E + ZPE = -2859.028590

|    |              |              |              |
|----|--------------|--------------|--------------|
| 28 | 1.067365000  | -0.645521000 | 0.440391000  |
| 15 | -0.663733000 | 0.851908000  | 0.220967000  |
| 6  | -0.746072000 | 2.079665000  | 1.667746000  |
| 1  | -1.544913000 | 1.750725000  | 2.338433000  |
| 6  | -1.108361000 | 3.461779000  | 1.053753000  |
| 1  | -1.789193000 | 4.008262000  | 1.715002000  |
| 1  | -0.191644000 | 4.060476000  | 0.981598000  |
| 6  | -1.690527000 | 3.276764000  | -0.348627000 |
| 1  | -1.691375000 | 4.217637000  | -0.911835000 |
| 1  | -2.731810000 | 2.933518000  | -0.302354000 |
| 6  | -0.829139000 | 2.224233000  | -1.069367000 |
| 1  | 0.188820000  | 2.622493000  | -1.167773000 |
| 6  | -1.368119000 | 1.869807000  | -2.456129000 |
| 1  | -2.355321000 | 1.400250000  | -2.399234000 |
| 1  | -0.703249000 | 1.206348000  | -3.017282000 |
| 1  | -1.476004000 | 2.787359000  | -3.045922000 |
| 6  | 0.549281000  | 2.160561000  | 2.490145000  |
| 1  | 1.423199000  | 2.353840000  | 1.857238000  |
| 1  | 0.736787000  | 1.255535000  | 3.073616000  |
| 1  | 0.470682000  | 2.990371000  | 3.202144000  |
| 6  | -2.302246000 | -0.021770000 | 0.134499000  |
| 6  | -3.376150000 | 0.363984000  | 0.950188000  |
| 1  | -3.273017000 | 1.191164000  | 1.642700000  |

|   |              |              |              |
|---|--------------|--------------|--------------|
| 6 | -4.610855000 | -0.287660000 | 0.894233000  |
| 1 | -5.419962000 | 0.039269000  | 1.540527000  |
| 6 | -4.796640000 | -1.342875000 | 0.008143000  |
| 1 | -5.751680000 | -1.856333000 | -0.047900000 |
| 6 | -3.742082000 | -1.732402000 | -0.818494000 |
| 1 | -3.890752000 | -2.545732000 | -1.524572000 |
| 6 | -2.496540000 | -1.096190000 | -0.773790000 |
| 6 | -1.418455000 | -1.578421000 | -1.727267000 |
| 1 | -0.936707000 | -0.739874000 | -2.232515000 |
| 1 | -1.869278000 | -2.211308000 | -2.503076000 |
| 8 | -0.347748000 | -2.294005000 | -1.096686000 |
| 6 | -0.688748000 | -3.635366000 | -0.749002000 |
| 1 | -0.970420000 | -4.207237000 | -1.643030000 |
| 1 | 0.201940000  | -4.085371000 | -0.304839000 |
| 1 | -1.514028000 | -3.672170000 | -0.026622000 |
| 6 | 1.298725000  | -1.426503000 | 2.335440000  |
| 6 | -0.045398000 | -1.332011000 | 2.030559000  |
| 1 | -0.656093000 | -0.544535000 | 2.457835000  |
| 4 | 4.568365000  | -2.784475000 | 0.309402000  |
| 1 | 1.798460000  | -0.665327000 | 2.930542000  |
| 1 | 1.776038000  | -2.395594000 | 2.339401000  |
| 6 | 2.677588000  | -1.816312000 | 0.050215000  |
| 6 | 3.698339000  | -2.509754000 | 0.921412000  |
| 1 | 2.168931000  | -2.503981000 | -0.628389000 |
| 1 | 4.060901000  | -1.894353000 | 1.749948000  |
| 1 | 3.306519000  | -3.441287000 | 1.341224000  |
| 6 | 2.938558000  | -0.523466000 | -0.508136000 |
| 6 | 3.949437000  | 0.378816000  | -0.039305000 |
| 1 | 4.661454000  | 0.040362000  | 0.705856000  |
| 6 | 1.990864000  | -0.051304000 | -1.465094000 |
| 1 | 1.396122000  | -0.779424000 | -2.010890000 |
| 6 | 2.173049000  | 1.237189000  | -2.041940000 |
| 6 | 4.059306000  | 1.637974000  | -0.577198000 |
| 6 | 3.174746000  | 2.069883000  | -1.600521000 |
| 1 | 4.853897000  | 2.299401000  | -0.243938000 |
| 1 | 1.541271000  | 1.543036000  | -2.869176000 |
| 1 | 3.319724000  | 3.044508000  | -2.057105000 |
| 1 | -0.599270000 | -2.209290000 | 1.710231000  |

76

E + ZPE = -2859.031639

|    |              |              |              |
|----|--------------|--------------|--------------|
| 28 | 1.002726000  | -0.817390000 | 0.576500000  |
| 15 | -0.479810000 | 0.875954000  | 0.268686000  |
| 6  | -0.231917000 | 2.143193000  | 1.640912000  |
| 1  | -1.166687000 | 2.713560000  | 1.715505000  |
| 6  | 0.811888000  | 3.075659000  | 0.995228000  |
| 1  | 0.964926000  | 3.962067000  | 1.621062000  |
| 1  | 1.781679000  | 2.563622000  | 0.920319000  |
| 6  | 0.280796000  | 3.441702000  | -0.391562000 |
| 1  | 1.038004000  | 3.944575000  | -1.003091000 |
| 1  | -0.555087000 | 4.143757000  | -0.279003000 |
| 6  | -0.226897000 | 2.162189000  | -1.110423000 |
| 1  | 0.579432000  | 1.766737000  | -1.729453000 |
| 6  | -1.435435000 | 2.456487000  | -2.007453000 |
| 1  | -2.299915000 | 2.795358000  | -1.427643000 |
| 1  | -1.748958000 | 1.595226000  | -2.603804000 |
| 1  | -1.168825000 | 3.257708000  | -2.707035000 |
| 6  | 0.166910000  | 1.657236000  | 3.035265000  |
| 1  | 1.072444000  | 1.040526000  | 3.006856000  |
| 1  | -0.624797000 | 1.083871000  | 3.527766000  |
| 1  | 0.379846000  | 2.522466000  | 3.673189000  |
| 6  | -2.253301000 | 0.369274000  | 0.211786000  |

|   |              |              |              |
|---|--------------|--------------|--------------|
| 6 | -3.161963000 | 0.855973000  | 1.161947000  |
| 1 | -2.831426000 | 1.530928000  | 1.944015000  |
| 6 | -4.510064000 | 0.491466000  | 1.131195000  |
| 1 | -5.191076000 | 0.885410000  | 1.879719000  |
| 6 | -4.972740000 | -0.363008000 | 0.135419000  |
| 1 | -6.021188000 | -0.641971000 | 0.091699000  |
| 6 | -4.076289000 | -0.859780000 | -0.812115000 |
| 1 | -4.439143000 | -1.519177000 | -1.596810000 |
| 6 | -2.718093000 | -0.523796000 | -0.786058000 |
| 6 | -1.797540000 | -1.152982000 | -1.817097000 |
| 1 | -1.018020000 | -0.454360000 | -2.130918000 |
| 1 | -2.375443000 | -1.426501000 | -2.711507000 |
| 8 | -1.089241000 | -2.299316000 | -2.336883000 |
| 6 | -1.870680000 | -3.489943000 | -1.289084000 |
| 1 | -2.276004000 | -3.733304000 | -2.281383000 |
| 1 | -1.200868000 | -4.291820000 | -0.971136000 |
| 1 | -2.700134000 | -3.408553000 | -0.574703000 |
| 6 | 2.746513000  | -1.809160000 | 0.619813000  |
| 6 | 2.838011000  | -0.804624000 | -0.415084000 |
| 6 | 1.903544000  | -0.916382000 | -1.484002000 |
| 6 | 3.707618000  | 0.329217000  | -0.387208000 |
| 1 | 1.318040000  | -1.826225000 | -1.607074000 |
| 1 | 4.400324000  | 0.449282000  | 0.439327000  |
| 6 | 1.974998000  | -0.020721000 | -2.573709000 |
| 6 | 3.741131000  | 1.205117000  | -1.452264000 |
| 1 | 1.331534000  | -0.174823000 | -3.435069000 |
| 1 | 4.450720000  | 2.027363000  | -1.452724000 |
| 6 | 2.891267000  | 1.015459000  | -2.566174000 |
| 1 | 2.968209000  | 1.683273000  | -3.419369000 |
| 6 | -0.389600000 | -1.512226000 | 1.880079000  |
| 6 | 0.843774000  | -2.020209000 | 2.253185000  |
| 1 | 1.386104000  | -1.579595000 | 3.085315000  |
| 1 | 1.098092000  | -3.050844000 | 2.031175000  |
| 1 | -1.075305000 | -2.106651000 | -2.33782000  |
| 1 | -0.853186000 | -0.727954000 | 2.466443000  |
| 1 | 2.534299000  | -2.805280000 | 0.228087000  |
| 6 | 3.743055000  | -1.823867000 | 1.758317000  |
| 1 | 3.793379000  | -0.868956000 | 2.292342000  |
| 1 | 3.505681000  | -2.602555000 | 2.487454000  |
| 1 | 4.748187000  | -2.042663000 | 1.373970000  |

77

E + ZPE = -2628.036837

|    |              |              |              |
|----|--------------|--------------|--------------|
| 28 | 1.613358000  | -0.248551000 | -0.443649000 |
| 15 | -0.356429000 | 0.755151000  | -0.014711000 |
| 6  | -0.385625000 | 1.685994000  | 1.632064000  |
| 1  | -1.314662000 | 1.374653000  | 2.123767000  |
| 6  | -0.512503000 | 3.172571000  | 1.228968000  |
| 1  | -0.887944000 | 3.762571000  | 2.072544000  |
| 1  | 0.481386000  | 3.570569000  | 0.981804000  |
| 6  | -1.427807000 | 3.267384000  | 0.002314000  |
| 1  | -1.423970000 | 4.274091000  | -0.431049000 |
| 1  | -2.466544000 | 3.051187000  | 0.282624000  |
| 6  | -0.924875000 | 2.239318000  | -1.033418000 |
| 1  | 0.000774000  | 2.641971000  | -1.457855000 |
| 6  | -1.884535000 | 1.936848000  | -2.186439000 |
| 1  | -2.835004000 | 1.527004000  | -1.832810000 |
| 1  | -1.454566000 | 1.223267000  | -2.898752000 |
| 1  | -2.100778000 | 2.859620000  | -2.735997000 |
| 6  | 0.782342000  | 1.395565000  | 2.577566000  |
| 1  | 1.744943000  | 1.662741000  | 2.127139000  |
| 1  | 0.819839000  | 0.340630000  | 2.871012000  |

|   |              |              |              |
|---|--------------|--------------|--------------|
| 1 | 0.673845000  | 1.984263000  | 3.495675000  |
| 6 | -1.790259000 | -0.407251000 | 0.046304000  |
| 6 | -3.038366000 | 0.022170000  | 0.527829000  |
| 1 | -3.162149000 | 1.034615000  | 0.897668000  |
| 6 | -4.144730000 | -0.827276000 | 0.537390000  |
| 1 | -5.098579000 | -0.465655000 | 0.909434000  |
| 6 | -4.018590000 | -2.134935000 | 0.072527000  |
| 1 | -4.872028000 | -2.805945000 | 0.079647000  |
| 6 | -2.781213000 | -2.584342000 | -0.386143000 |
| 1 | -2.676442000 | -3.610738000 | -0.728743000 |
| 6 | -1.668335000 | -1.736947000 | -0.411718000 |
| 6 | -0.355808000 | -2.287430000 | -0.911538000 |
| 1 | -0.045380000 | -1.840654000 | -1.860795000 |
| 1 | -0.425125000 | -3.370205000 | -1.060904000 |
| 8 | 0.746926000  | -2.033041000 | -0.007768000 |
| 6 | 0.610013000  | -2.666210000 | 1.280829000  |
| 1 | 0.397146000  | -3.730130000 | 1.138512000  |
| 1 | 1.564582000  | -2.551618000 | 1.793238000  |
| 1 | -0.191471000 | -2.200265000 | 1.861349000  |
| 6 | 3.403234000  | -1.237855000 | -0.153154000 |
| 6 | 3.815299000  | -0.828443000 | 1.256547000  |
| 1 | 4.475525000  | -1.594265000 | 1.685700000  |
| 1 | 4.374156000  | 0.114293000  | 1.258022000  |
| 1 | 4.289762000  | -1.390341000 | -0.765926000 |
| 1 | 2.867901000  | -2.188958000 | -0.197558000 |
| 6 | 2.190850000  | 1.327198000  | -1.362077000 |
| 6 | 3.288721000  | 0.434090000  | -1.464757000 |
| 1 | 3.437902000  | -0.115479000 | -2.390941000 |
| 1 | 2.319423000  | 2.224090000  | -0.755829000 |
| 1 | 2.973244000  | -0.705778000 | 1.946670000  |
| 1 | 1.571176000  | 1.476873000  | -2.245456000 |
| 1 | 4.213155000  | 0.721389000  | -0.975773000 |

78  
E + ZPE = -2859.011273

|    |              |              |              |
|----|--------------|--------------|--------------|
| 28 | -0.229910000 | 1.408646000  | -0.436229000 |
| 15 | 0.618203000  | -0.644404000 | 0.077267000  |
| 6  | 0.169343000  | -1.266124000 | 1.807143000  |
| 1  | 1.110109000  | -1.645039000 | 2.224389000  |
| 6  | -0.771200000 | -2.464100000 | 1.546695000  |
| 1  | -0.818806000 | -3.104225000 | 2.435197000  |
| 1  | -1.787704000 | -2.097961000 | 1.357512000  |
| 6  | -0.256975000 | -3.224224000 | 0.317365000  |
| 1  | -0.977874000 | -3.976440000 | -0.022982000 |
| 1  | 0.668328000  | -3.763507000 | 0.558118000  |
| 6  | -0.005299000 | -2.189768000 | -0.802165000 |
| 1  | -0.988743000 | -1.892588000 | -1.174843000 |
| 6  | 0.826665000  | -2.685816000 | -1.987240000 |
| 1  | 1.827562000  | -3.006883000 | -1.685474000 |
| 1  | 0.940625000  | -1.915647000 | -2.759053000 |
| 1  | 0.327240000  | -3.543682000 | -2.451627000 |
| 6  | -0.400244000 | -0.222157000 | 2.770230000  |
| 1  | -1.343494000 | 0.192486000  | 2.400676000  |
| 1  | 0.300172000  | 0.602310000  | 2.945056000  |
| 1  | -0.603782000 | -0.686599000 | 3.741986000  |
| 6  | 2.466138000  | -0.733761000 | 0.012352000  |
| 6  | 3.129985000  | -1.893268000 | 0.448052000  |
| 1  | 2.563349000  | -2.728074000 | 0.846631000  |
| 6  | 4.518253000  | -2.007704000 | 0.376734000  |
| 1  | 5.001631000  | -2.919070000 | 0.715590000  |
| 6  | 5.276818000  | -0.951184000 | -0.124032000 |
| 1  | 6.358476000  | -1.027160000 | -0.178249000 |

|   |              |              |              |
|---|--------------|--------------|--------------|
| 6 | 4.636938000  | 0.215819000  | -0.537607000 |
| 1 | 5.227162000  | 1.050991000  | -0.906626000 |
| 6 | 3.244031000  | 0.333739000  | -0.482297000 |
| 6 | 2.610126000  | 1.624228000  | -0.933380000 |
| 1 | 2.050750000  | 1.512796000  | -1.867666000 |
| 1 | 3.370833000  | 2.396742000  | -1.090373000 |
| 8 | 1.642530000  | 2.130153000  | 0.013754000  |
| 6 | 2.199642000  | 2.521054000  | 1.283860000  |
| 1 | 3.013402000  | 3.234172000  | 1.117569000  |
| 1 | 1.399162000  | 3.004568000  | 1.843880000  |
| 1 | 2.574149000  | 1.651408000  | 1.831793000  |
| 6 | -0.793751000 | 3.389937000  | -0.277941000 |
| 6 | -1.439195000 | 3.525918000  | 1.096174000  |
| 1 | -1.272229000 | 4.543148000  | 1.476090000  |
| 1 | -2.523096000 | 3.378095000  | 1.051006000  |
| 1 | -1.270135000 | 4.080712000  | -0.971463000 |
| 1 | 0.261169000  | 3.667097000  | -0.286602000 |
| 6 | -1.752158000 | 0.630437000  | -1.380934000 |
| 6 | -1.797527000 | 2.042254000  | -1.587350000 |
| 1 | -2.689715000 | 2.550791000  | -1.237623000 |
| 1 | -1.041450000 | 2.832967000  | 1.847598000  |
| 1 | -1.310566000 | 0.056757000  | -2.197820000 |
| 1 | -1.402336000 | 2.448838000  | -2.516052000 |
| 6 | -2.888440000 | -0.069204000 | -0.720577000 |
| 6 | -3.477117000 | 0.382290000  | 0.473713000  |
| 1 | -3.082088000 | 1.260473000  | 0.975209000  |
| 6 | -3.437545000 | -1.208815000 | -1.335168000 |
| 1 | -3.019907000 | -1.561369000 | -2.275702000 |
| 6 | -4.534330000 | -1.869957000 | -0.781966000 |
| 6 | -4.572950000 | -0.277773000 | 1.028638000  |
| 6 | -5.104580000 | -1.409175000 | 0.405555000  |
| 1 | -5.012412000 | 0.092611000  | 1.950532000  |
| 1 | -4.946957000 | -2.739976000 | -1.284671000 |
| 1 | -5.958391000 | -1.921866000 | 0.838247000  |

79  
E + ZPE = -2859.010267

|    |              |              |              |
|----|--------------|--------------|--------------|
| 28 | 0.455021000  | -0.648809000 | -0.259114000 |
| 15 | -1.256826000 | 0.763329000  | -0.004498000 |
| 6  | -1.187569000 | 1.773138000  | 1.591228000  |
| 1  | -2.200068000 | 1.736707000  | 2.010826000  |
| 6  | -0.906495000 | 3.214657000  | 1.110974000  |
| 1  | -1.168290000 | 3.934055000  | 1.895035000  |
| 1  | 0.168817000  | 3.333298000  | 0.917552000  |
| 6  | -1.694555000 | 3.453660000  | -0.182774000 |
| 1  | -1.418082000 | 4.401433000  | -0.658847000 |
| 1  | -2.769388000 | 3.512626000  | 0.032711000  |
| 6  | -1.402357000 | 2.271767000  | -1.131721000 |
| 1  | -0.389023000 | 2.414243000  | -1.522024000 |
| 6  | -2.350360000 | 2.133898000  | -2.325284000 |
| 1  | -3.388787000 | 1.993332000  | -2.012236000 |
| 1  | -2.075688000 | 1.289861000  | -2.968338000 |
| 1  | -2.304576000 | 3.041578000  | -2.937309000 |
| 6  | -0.207796000 | 1.261731000  | 2.649754000  |
| 1  | 0.821638000  | 1.243484000  | 2.274153000  |
| 1  | -0.464637000 | 0.252741000  | 2.990936000  |
| 1  | -0.228694000 | 1.917946000  | 3.527368000  |
| 6  | -2.915837000 | -0.047055000 | -0.023308000 |
| 6  | -4.067415000 | 0.670738000  | 0.338800000  |
| 1  | -3.986632000 | 1.702179000  | 0.666166000  |
| 6  | -5.334000000 | 0.089341000  | 0.277956000  |
| 1  | -6.207875000 | 0.669742000  | 0.558222000  |

|   |              |              |              |
|---|--------------|--------------|--------------|
| 6 | -5.469986000 | -1.233041000 | -0.140605000 |
| 1 | -6.450572000 | -1.696691000 | -0.187882000 |
| 6 | -4.334573000 | -1.965010000 | -0.485314000 |
| 1 | -4.437755000 | -3.002059000 | -0.794885000 |
| 6 | -3.061027000 | -1.388169000 | -0.438999000 |
| 6 | -1.869161000 | -2.231624000 | -0.820181000 |
| 1 | -1.382245000 | -1.878320000 | -1.734180000 |
| 1 | -2.172826000 | -3.271063000 | -0.986419000 |
| 8 | -0.827086000 | -2.221976000 | 0.182907000  |
| 6 | -1.226089000 | -2.831822000 | 1.426736000  |
| 1 | -1.655576000 | -3.817933000 | 1.222882000  |
| 1 | -0.327633000 | -2.946586000 | 2.030282000  |
| 1 | -1.959503000 | -2.210170000 | 1.949236000  |
| 6 | 1.969621000  | -2.025473000 | 0.096291000  |
| 6 | 2.146632000  | -1.796400000 | 1.592254000  |
| 1 | 2.481109000  | -2.727641000 | 2.070705000  |
| 1 | 2.919342000  | -1.045732000 | 1.783975000  |
| 1 | 2.920944000  | -2.334879000 | -0.326404000 |
| 1 | 1.256133000  | -2.812880000 | -0.164542000 |
| 6 | 1.390567000  | 0.617980000  | -1.294452000 |
| 6 | 2.420256000  | -0.374865000 | -1.215776000 |
| 1 | 2.474406000  | -1.055018000 | -2.062683000 |
| 1 | 1.605811000  | 1.589854000  | -0.852314000 |
| 1 | 1.238737000  | -1.474205000 | 2.114064000  |
| 1 | 0.874285000  | 0.699304000  | -2.254020000 |
| 6 | 3.757793000  | -0.046754000 | -0.653459000 |
| 6 | 3.948701000  | 0.925588000  | 0.342112000  |
| 1 | 3.095396000  | 1.449990000  | 0.764062000  |
| 6 | 4.885869000  | -0.704702000 | -1.168519000 |
| 1 | 4.759779000  | -1.456306000 | -1.944855000 |
| 6 | 6.167244000  | -0.391800000 | -0.716845000 |
| 6 | 5.228199000  | 1.234457000  | 0.800150000  |
| 6 | 6.341969000  | 0.578037000  | 0.271164000  |
| 1 | 5.356367000  | 1.990079000  | 1.569816000  |
| 1 | 7.027269000  | -0.903236000 | -1.138864000 |
| 1 | 7.338528000  | 0.823142000  | 0.626123000  |

**80**  
E + ZPE = -2628.024426

|    |              |              |              |
|----|--------------|--------------|--------------|
| 28 | 1.522899000  | -0.792512000 | -0.086671000 |
| 15 | -0.248839000 | 0.746925000  | 0.025547000  |
| 6  | -0.360856000 | 2.043111000  | 1.400445000  |
| 1  | -1.417509000 | 2.081778000  | 1.687148000  |
| 6  | 0.001089000  | 3.371987000  | 0.699714000  |
| 1  | -0.343018000 | 4.223868000  | 1.297146000  |
| 1  | 1.093359000  | 3.463099000  | 0.619329000  |
| 6  | -0.623296000 | 3.359485000  | -0.701687000 |
| 1  | -0.281415000 | 4.204779000  | -1.310085000 |
| 1  | -1.715591000 | 3.445127000  | -0.628525000 |
| 6  | -0.246306000 | 2.021551000  | -1.373002000 |
| 1  | 0.810692000  | 2.083307000  | -1.667766000 |
| 6  | -1.067155000 | 1.658533000  | -2.612624000 |
| 1  | -2.132291000 | 1.564982000  | -2.380615000 |
| 1  | -0.736164000 | 0.714786000  | -3.061389000 |
| 1  | -0.956469000 | 2.440119000  | -3.372493000 |
| 6  | 0.454311000  | 1.748146000  | 2.663084000  |
| 1  | 1.529644000  | 1.711012000  | 2.459041000  |
| 1  | 0.160817000  | 0.800182000  | 3.127615000  |
| 1  | 0.292200000  | 2.539031000  | 3.404132000  |
| 6  | -1.899454000 | -0.086709000 | 0.012043000  |
| 6  | -3.072706000 | 0.658519000  | 0.220537000  |
| 1  | -3.014731000 | 1.731198000  | 0.373528000  |

|   |              |              |              |
|---|--------------|--------------|--------------|
| 6 | -4.331464000 | 0.058697000  | 0.225669000  |
| 1 | -5.218059000 | 0.665987000  | 0.380987000  |
| 6 | -4.441340000 | -1.317114000 | 0.037206000  |
| 1 | -5.413668000 | -1.799869000 | 0.050760000  |
| 6 | -3.289123000 | -2.074650000 | -0.163735000 |
| 1 | -3.375628000 | -3.148697000 | -0.308481000 |
| 6 | -2.020866000 | -1.481059000 | -0.194422000 |
| 6 | -0.851206000 | -2.384858000 | -0.515244000 |
| 1 | -0.455514000 | -2.196063000 | -1.517873000 |
| 1 | -1.165751000 | -3.433170000 | -0.475470000 |
| 8 | 0.296454000  | -2.246462000 | 0.356172000  |
| 6 | 0.061923000  | -2.617038000 | 1.728936000  |
| 1 | -0.409673000 | -3.604238000 | 1.755005000  |
| 1 | 1.039003000  | -2.664128000 | 2.210447000  |
| 1 | -0.577828000 | -1.883686000 | 2.229770000  |
| 6 | 3.013546000  | 0.560876000  | 0.059930000  |
| 6 | 4.460272000  | 0.382984000  | 0.505067000  |
| 1 | 4.683695000  | 1.116688000  | 1.289575000  |
| 1 | 4.639074000  | -0.608544000 | 0.934185000  |
| 1 | 2.848003000  | 1.507674000  | -0.457148000 |
| 1 | 2.402632000  | 0.567836000  | 0.982760000  |
| 6 | 2.766701000  | -2.013775000 | -0.883112000 |
| 6 | 2.976101000  | -0.737696000 | -1.510203000 |
| 1 | 3.588739000  | -2.426459000 | -0.301196000 |
| 1 | 2.329602000  | -0.453163000 | -2.343945000 |
| 1 | 3.980776000  | -0.365747000 | -1.676997000 |
| 1 | 2.172320000  | -2.769329000 | -1.394302000 |
| 1 | 5.181517000  | 0.543879000  | -0.302544000 |

**81**  
E + ZPE = -2859.000385

|    |              |              |              |
|----|--------------|--------------|--------------|
| 28 | -0.650405000 | -0.781125000 | 0.255176000  |
| 15 | 1.666256000  | -0.478461000 | 0.036763000  |
| 6  | 2.627655000  | -1.172242000 | 1.510972000  |
| 1  | 3.322766000  | -0.382368000 | 1.818436000  |
| 6  | 3.441921000  | -2.346410000 | 0.921035000  |
| 1  | 4.280437000  | -2.599293000 | 1.579745000  |
| 1  | 2.805341000  | -3.240903000 | 0.864691000  |
| 6  | 3.907952000  | -1.956256000 | -0.486652000 |
| 1  | 4.348180000  | -2.806451000 | -1.020686000 |
| 1  | 4.686904000  | -1.184757000 | -0.428636000 |
| 6  | 2.683298000  | -1.411477000 | -1.252522000 |
| 1  | 2.054062000  | -2.270540000 | -1.519826000 |
| 6  | 3.004606000  | -0.644554000 | -2.537629000 |
| 1  | 3.634392000  | 0.228670000  | -2.344096000 |
| 1  | 2.097251000  | -0.298497000 | -3.045421000 |
| 1  | 3.541819000  | -1.298289000 | -3.233796000 |
| 6  | 1.770758000  | -1.560263000 | 2.720200000  |
| 1  | 1.039829000  | -2.337153000 | 2.465908000  |
| 1  | 1.228005000  | -0.702597000 | 3.133110000  |
| 1  | 2.407149000  | -1.958558000 | 3.518897000  |
| 6  | 2.164535000  | 1.291951000  | -0.086970000 |
| 6  | 3.499295000  | 1.691839000  | 0.086608000  |
| 1  | 4.260514000  | 0.957570000  | 0.330407000  |
| 6  | 3.881326000  | 3.026106000  | -0.054723000 |
| 1  | 4.921797000  | 3.306682000  | 0.078790000  |
| 6  | 2.925105000  | 3.991823000  | -0.363794000 |
| 1  | 3.211086000  | 5.033740000  | -0.470593000 |
| 6  | 1.591931000  | 3.614707000  | -0.520342000 |
| 1  | 0.842966000  | 4.370411000  | -0.743673000 |
| 6  | 1.200369000  | 2.277309000  | -0.395440000 |
| 6  | -0.258710000 | 1.935850000  | -0.583610000 |

|   |              |              |              |
|---|--------------|--------------|--------------|
| 1 | -0.439403000 | 1.333106000  | -1.477616000 |
| 1 | -0.859699000 | 2.846839000  | -0.670747000 |
| 8 | -0.813373000 | 1.153830000  | 0.505420000  |
| 6 | -0.777569000 | 1.824626000  | 1.781135000  |
| 1 | -1.200704000 | 2.826991000  | 1.667806000  |
| 1 | -1.394085000 | 1.243228000  | 2.463955000  |
| 1 | 0.247198000  | 1.891972000  | 2.157779000  |
| 6 | -0.564960000 | -2.736331000 | -0.569457000 |
| 6 | -0.674081000 | -2.357872000 | -2.045771000 |
| 1 | -1.719578000 | -2.298394000 | -2.364140000 |
| 1 | -0.200813000 | -1.403703000 | -2.299999000 |
| 1 | -0.941553000 | -3.751713000 | -0.453741000 |
| 1 | 0.462555000  | -2.830843000 | -0.210476000 |
| 6 | -2.431599000 | -0.983702000 | 0.962833000  |
| 6 | -2.087274000 | -2.330070000 | 0.598229000  |
| 1 | -2.308083000 | -0.755858000 | 2.025057000  |
| 1 | -2.759327000 | -2.806210000 | -0.110509000 |
| 1 | -1.805567000 | -2.996042000 | 1.410925000  |
| 1 | -0.202253000 | -3.133839000 | -2.661939000 |
| 6 | -3.544186000 | -0.239991000 | 0.332115000  |
| 6 | -3.968378000 | -0.460796000 | -0.991733000 |
| 1 | -3.480189000 | -1.214782000 | -1.602632000 |
| 6 | -4.216848000 | 0.743952000  | 1.079667000  |
| 1 | -3.925209000 | 0.920270000  | 2.112707000  |
| 6 | -5.273528000 | 1.470807000  | 0.534888000  |
| 6 | -5.022679000 | 0.266931000  | -1.539305000 |
| 6 | -5.680145000 | 1.237781000  | -0.779986000 |
| 1 | -5.334567000 | 0.072408000  | -2.561605000 |
| 1 | -5.784958000 | 2.213475000  | 1.140757000  |
| 1 | -6.504544000 | 1.800882000  | -1.207075000 |

**82**  
E + ZPE = -2858.998689

|    |              |              |              |
|----|--------------|--------------|--------------|
| 28 | -0.733834000 | 0.835017000  | -1.054100000 |
| 15 | 0.862839000  | 0.503810000  | 0.670902000  |
| 6  | 1.561619000  | 1.997271000  | 1.603396000  |
| 1  | 2.628063000  | 1.789090000  | 1.740535000  |
| 6  | 0.879329000  | 1.925812000  | 2.987017000  |
| 1  | 1.422806000  | 2.541168000  | 3.713228000  |
| 1  | -0.137808000 | 2.337214000  | 2.921830000  |
| 6  | 0.820360000  | 0.451916000  | 3.407417000  |
| 1  | 0.219808000  | 0.307474000  | 4.313079000  |
| 1  | 1.830624000  | 0.087613000  | 3.637862000  |
| 6  | 0.229370000  | -0.355840000 | 2.232408000  |
| 1  | -0.853712000 | -0.179782000 | 2.204350000  |
| 6  | 0.458133000  | -1.866990000 | 2.303531000  |
| 1  | 1.523417000  | -2.117930000 | 2.294884000  |
| 1  | -0.026132000 | -2.389422000 | 1.472119000  |
| 1  | 0.028420000  | -2.260361000 | 3.231803000  |
| 6  | 1.447641000  | 3.353349000  | 0.900712000  |
| 1  | 0.406614000  | 3.660735000  | 0.758215000  |
| 1  | 1.941084000  | 3.350389000  | -0.077775000 |
| 1  | 1.932309000  | 4.126779000  | 1.507468000  |
| 6  | 2.352552000  | -0.426881000 | 0.090176000  |
| 6  | 3.508817000  | -0.506536000 | 0.884262000  |
| 1  | 3.531626000  | -0.040099000 | 1.863649000  |
| 6  | 4.646807000  | -1.189659000 | 0.455520000  |
| 1  | 5.520635000  | -1.237933000 | 1.098356000  |
| 6  | 4.656276000  | -1.801365000 | -0.795808000 |
| 1  | 5.539792000  | -2.325598000 | -1.146970000 |
| 6  | 3.518818000  | -1.733869000 | -1.598382000 |
| 1  | 3.523389000  | -2.214403000 | -2.573657000 |

|   |              |              |              |
|---|--------------|--------------|--------------|
| 6 | 2.362946000  | -1.070158000 | -1.169307000 |
| 6 | 1.149305000  | -1.140855000 | -2.066394000 |
| 1 | 0.348083000  | -1.732335000 | -1.615996000 |
| 1 | 1.414431000  | -1.603944000 | -3.023024000 |
| 8 | 0.526883000  | 0.133386000  | -2.363875000 |
| 6 | 1.343628000  | 1.038492000  | -3.131994000 |
| 1 | 1.716627000  | 0.516884000  | -4.019109000 |
| 1 | 0.695985000  | 1.861615000  | -3.433307000 |
| 1 | 2.183675000  | 1.408992000  | -2.536385000 |
| 6 | -1.990930000 | 2.052951000  | 0.019933000  |
| 6 | -2.925490000 | 3.185416000  | -0.386593000 |
| 1 | -2.651600000 | 4.097211000  | 0.158526000  |
| 1 | -2.849928000 | 3.415068000  | -1.454632000 |
| 1 | -2.117480000 | 1.755242000  | 1.061472000  |
| 1 | -0.966370000 | 2.452240000  | -0.098294000 |
| 6 | -2.174153000 | 0.665569000  | -2.277457000 |
| 6 | -2.815910000 | 0.516037000  | -0.984042000 |
| 1 | -2.485380000 | 1.534284000  | -2.856180000 |
| 1 | -3.736900000 | 1.071252000  | -0.832367000 |
| 1 | -2.001939000 | -0.211195000 | -2.897978000 |
| 1 | -3.974994000 | 2.972926000  | -0.156052000 |
| 6 | -2.889412000 | -0.802610000 | -0.268120000 |
| 6 | -3.509095000 | -0.854990000 | 0.992379000  |
| 1 | -3.896129000 | 0.058927000  | 1.437189000  |
| 6 | -2.443792000 | -2.007715000 | -0.836874000 |
| 1 | -2.016837000 | -2.017125000 | -1.834859000 |
| 6 | -2.598024000 | -3.218820000 | -0.159800000 |
| 6 | -3.654877000 | -2.061744000 | 1.674255000  |
| 6 | -3.196034000 | -3.250110000 | 1.101087000  |
| 1 | -4.143032000 | -2.076941000 | 2.644420000  |
| 1 | -2.266325000 | -4.141188000 | -0.628167000 |
| 1 | -3.320438000 | -4.193576000 | 1.624084000  |

**83**  
E + ZPE = -2744.680088

|    |              |              |              |
|----|--------------|--------------|--------------|
| 28 | -0.789400000 | -0.151568000 | -1.009842000 |
| 15 | 1.115668000  | -0.735059000 | 0.038877000  |
| 6  | 0.843059000  | -1.502817000 | 1.747798000  |
| 1  | 1.552252000  | -0.992086000 | 2.410261000  |
| 6  | 1.293523000  | -2.971440000 | -1.581875000 |
| 1  | 1.507745000  | -3.414132000 | 2.561084000  |
| 1  | 0.474919000  | -3.557339000 | 1.141384000  |
| 6  | 2.511677000  | -3.003560000 | 0.651528000  |
| 1  | 2.777268000  | -4.027139000 | 0.363437000  |
| 1  | 3.390178000  | -2.582485000 | 1.156849000  |
| 6  | 2.159860000  | -2.172151000 | -0.600345000 |
| 1  | 1.455634000  | -2.768019000 | -1.189509000 |
| 6  | 3.339535000  | -1.801221000 | -1.502067000 |
| 1  | 4.087970000  | -1.203083000 | -0.974393000 |
| 1  | 3.017591000  | -1.235360000 | -2.383781000 |
| 1  | 3.830616000  | -2.713301000 | -1.859061000 |
| 6  | -0.563126000 | -1.347704000 | 2.331224000  |
| 1  | -1.320061000 | -1.824389000 | 1.698340000  |
| 1  | -0.838567000 | -0.295691000 | 2.464228000  |
| 1  | -0.610884000 | -1.823789000 | 3.317262000  |
| 6  | 2.279936000  | 0.672732000  | 0.309126000  |
| 6  | 3.412736000  | 0.513927000  | 1.124762000  |
| 1  | 3.597735000  | -0.432545000 | 1.622030000  |
| 6  | 4.326620000  | 1.551422000  | 1.309281000  |
| 1  | 5.196806000  | 1.397522000  | 1.940222000  |
| 6  | 4.115679000  | 2.779702000  | 0.685518000  |
| 1  | 4.817459000  | 3.595995000  | 0.826353000  |

|       |              |              |              |   |              |              |              |
|-------|--------------|--------------|--------------|---|--------------|--------------|--------------|
| 6     | 2.985062000  | 2.960830000  | -0.109608000 | 1 | 2.403799000  | 4.081567000  | -1.395443000 |
| 1     | 2.809007000  | 3.924846000  | -0.580412000 | 6 | 2.119015000  | 2.059413000  | -0.719303000 |
| 6     | 2.069592000  | 1.922464000  | -0.312631000 | 6 | 0.926016000  | 1.857479000  | -1.620484000 |
| 6     | 0.866695000  | 2.185164000  | -1.184659000 | 1 | 1.113438000  | 1.121771000  | -2.408188000 |
| 1     | 0.898225000  | 1.624423000  | -2.123619000 | 1 | 0.645818000  | 2.799171000  | -2.104419000 |
| 1     | 0.799213000  | 3.249413000  | -1.434550000 | 8 | -0.235919000 | 1.355533000  | -0.917442000 |
| 8     | -0.382218000 | 1.793013000  | -0.566039000 | 6 | -0.752547000 | 2.261738000  | 0.079853000  |
| 6     | -0.698361000 | 2.524658000  | 0.634983000  | 1 | -0.881112000 | 3.252044000  | -0.367769000 |
| 1     | -0.628743000 | 3.597884000  | 0.432453000  | 1 | -1.725032000 | 1.878165000  | 0.388156000  |
| 1     | -1.724128000 | 2.270367000  | 0.899865000  | 1 | -0.075312000 | 2.325987000  | 0.936625000  |
| 1     | -0.017802000 | 2.254073000  | 1.447599000  | 6 | -2.262764000 | -0.540164000 | -1.183231000 |
| 6     | -2.726864000 | 0.495767000  | -1.312824000 | 6 | -2.856536000 | -0.865093000 | 0.193060000  |
| 6     | -3.416927000 | 0.100207000  | -0.010588000 | 1 | -2.978477000 | -1.952926000 | 0.287766000  |
| 1     | -3.704170000 | -0.958859000 | -0.041060000 | 1 | -2.938183000 | -0.881568000 | -1.965669000 |
| 1     | -3.435491000 | 0.431448000  | -2.137601000 | 1 | -2.153895000 | 0.530695000  | -1.368033000 |
| 1     | -2.372015000 | 1.529704000  | -1.329521000 | 6 | 0.104445000  | -2.492789000 | -1.401442000 |
| 6     | -0.811860000 | -1.847137000 | -1.893508000 | 6 | -1.163427000 | -2.187574000 | -1.963323000 |
| 6     | -1.968650000 | -1.183008000 | -2.378479000 | 1 | -1.228008000 | -1.923585000 | -3.016272000 |
| 1     | -1.939077000 | -0.714052000 | -3.358933000 | 1 | 0.140455000  | -3.232872000 | -0.601710000 |
| 1     | -0.957501000 | -2.722336000 | -1.260253000 | 1 | -2.182506000 | -0.564571000 | 1.004468000  |
| 1     | -2.745963000 | 0.202342000  | 0.853569000  | 1 | 0.963369000  | -2.526684000 | -2.070817000 |
| 1     | 0.050499000  | -1.920923000 | -2.555597000 | 1 | -2.015726000 | -2.755136000 | -1.606204000 |
| 1     | -2.931119000 | -1.618280000 | -2.133595000 | 6 | -4.195787000 | -0.174422000 | 0.393310000  |
| 6     | -4.692881000 | 0.941012000  | 0.249402000  | 6 | -4.339751000 | 0.848032000  | 1.339650000  |
| 1     | -5.387620000 | 0.808350000  | -0.589040000 | 1 | -3.493214000 | 1.124604000  | 1.965833000  |
| 1     | -4.421078000 | 2.007412000  | 0.265211000  | 6 | -5.311742000 | -0.539174000 | -0.373807000 |
| 6     | -5.369803000 | 0.565919000  | 1.540689000  | 1 | -5.229165000 | -1.343141000 | -1.102241000 |
| 1     | -4.797452000 | 0.749591000  | 2.451759000  | 6 | -6.535823000 | 0.105507000  | -0.201807000 |
| 6     | -6.586136000 | 0.028530000  | 1.633911000  | 6 | -5.564078000 | 1.496578000  | 1.514434000  |
| 1     | -7.195094000 | -0.167811000 | 0.753695000  | 6 | -6.664753000 | 1.128551000  | 0.740922000  |
| 1     | -7.026621000 | -0.225835000 | 2.593725000  | 1 | -5.658247000 | 2.281562000  | 2.259585000  |
| ..... |              |              |              | 1 | -7.391811000 | -0.194900000 | -0.799415000 |
|       |              |              |              | 1 | -7.619343000 | 1.628488000  | 0.876176000  |
| ..... |              |              |              |   |              |              |              |

**84**  
E + ZPE = -2859.005955

|    |              |              |              |
|----|--------------|--------------|--------------|
| 28 | -0.224184000 | -0.677799000 | -0.892489000 |
| 15 | 1.770442000  | -0.620923000 | 0.153615000  |
| 6  | 1.694430000  | -1.145362000 | 1.969500000  |
| 1  | 2.251480000  | -0.376743000 | 2.517757000  |
| 6  | 2.493877000  | -2.466990000 | 2.021218000  |
| 1  | 2.816113000  | -2.674683000 | 3.047791000  |
| 1  | 1.843289000  | -3.299346000 | 1.719049000  |
| 6  | 3.677580000  | -2.358105000 | 1.052295000  |
| 1  | 4.184427000  | -3.320770000 | 0.919039000  |
| 1  | 4.428988000  | -1.659840000 | 1.442733000  |
| 6  | 3.125635000  | -1.854690000 | -0.298333000 |
| 1  | 2.585424000  | -2.691008000 | -0.753831000 |
| 6  | 4.175157000  | -1.363318000 | -1.298198000 |
| 1  | 4.751881000  | -0.521055000 | -0.905445000 |
| 1  | 3.721810000  | -1.049011000 | -2.245408000 |
| 1  | 4.876682000  | -2.174152000 | -1.523558000 |
| 6  | 0.292240000  | -1.245072000 | 2.574606000  |
| 1  | -0.321874000 | -1.988312000 | 2.054052000  |
| 1  | -0.233629000 | -0.284242000 | 2.550036000  |
| 1  | 0.361428000  | -1.552133000 | 3.624390000  |
| 6  | 2.574953000  | 1.041461000  | 0.146095000  |
| 6  | 3.675749000  | 1.311851000  | 0.975716000  |
| 1  | 4.046647000  | 0.552520000  | 1.656031000  |
| 6  | 4.323559000  | 2.546964000  | 0.942855000  |
| 1  | 5.175866000  | 2.725805000  | 1.591399000  |
| 6  | 3.872110000  | 3.543895000  | 0.080127000  |
| 1  | 4.366087000  | 4.510214000  | 0.049869000  |
| 6  | 2.768509000  | 3.298295000  | -0.735601000 |

**85R**  
E + ZPE = -2937.575773

|    |              |              |              |
|----|--------------|--------------|--------------|
| 28 | 0.307712000  | -0.968871000 | -1.069942000 |
| 15 | 1.939920000  | -0.561808000 | 0.429060000  |
| 6  | 1.358942000  | -0.580261000 | 2.228876000  |
| 1  | 1.757914000  | 0.338620000  | 2.673816000  |
| 6  | 2.087378000  | -1.791807000 | 2.856608000  |
| 1  | 2.122546000  | -1.687688000 | 3.946848000  |
| 1  | 1.519247000  | -2.708177000 | 2.645019000  |
| 6  | 3.486456000  | -1.898097000 | 2.238770000  |
| 1  | 3.984406000  | -2.833678000 | 2.518431000  |
| 1  | 4.127671000  | -1.082857000 | 2.597226000  |
| 6  | 3.323132000  | -1.817822000 | 0.706678000  |
| 1  | 2.892911000  | -2.770302000 | 0.380375000  |
| 6  | 4.611601000  | -1.579691000 | -0.083676000 |
| 1  | 5.094222000  | -0.638648000 | 0.195335000  |
| 1  | 4.429489000  | -1.558644000 | -1.164364000 |
| 1  | 5.320154000  | -2.391713000 | 0.113739000  |
| 6  | -0.157587000 | -0.595234000 | 2.439420000  |
| 1  | -0.622916000 | -1.477669000 | 1.986386000  |
| 1  | -0.641404000 | 0.296424000  | 2.027177000  |
| 1  | -0.382153000 | -0.619413000 | 3.511941000  |
| 6  | 2.791527000  | 1.060574000  | 0.189550000  |
| 6  | 3.624672000  | 1.591258000  | 1.187892000  |
| 1  | 3.747200000  | 1.070080000  | 2.131398000  |
| 6  | 4.319925000  | 2.785350000  | 0.994228000  |
| 1  | 4.961308000  | 3.168961000  | 1.781966000  |
| 6  | 4.186210000  | 3.478890000  | -0.206926000 |

|   |              |              |              |
|---|--------------|--------------|--------------|
| 1 | 4.719549000  | 4.411042000  | -0.366090000 |
| 6 | 3.348134000  | 2.975279000  | -1.200953000 |
| 1 | 3.227740000  | 3.525047000  | -2.131123000 |
| 6 | 2.655997000  | 1.773088000  | -1.021599000 |
| 1 | 1.753826000  | 1.283717000  | -2.127030000 |
| 1 | 2.108796000  | 0.354420000  | -2.582079000 |
| 1 | 1.675129000  | 2.034344000  | -2.920804000 |
| 8 | 0.415563000  | 0.980569000  | -1.664768000 |
| 6 | -0.296865000 | 2.131445000  | -1.165251000 |
| 1 | -0.267509000 | 2.925407000  | -1.918090000 |
| 1 | -1.328487000 | 1.824698000  | -0.999933000 |
| 1 | 0.145658000  | 2.489020000  | -0.230982000 |
| 6 | -1.537685000 | -0.971202000 | -1.989504000 |
| 6 | -2.450316000 | -0.728843000 | -0.791990000 |
| 1 | -2.642562000 | -1.676782000 | -0.271468000 |
| 1 | -2.027192000 | -1.609853000 | -2.720641000 |
| 1 | -1.272614000 | -0.061914000 | -2.535843000 |
| 6 | 0.682050000  | -2.841516000 | -0.913905000 |
| 6 | -0.397459000 | -2.772735000 | -1.830459000 |
| 1 | -0.196790000 | -2.873180000 | -2.894057000 |
| 1 | 0.495217000  | -3.293114000 | 0.060481000  |
| 1 | -1.970242000 | -0.077214000 | -0.050719000 |
| 1 | 1.675838000  | -3.044337000 | -1.311631000 |
| 1 | -1.342591000 | -3.205766000 | -1.521164000 |
| 6 | -3.819016000 | -0.084372000 | -1.175145000 |
| 1 | -3.605065000 | 0.781592000  | -1.818220000 |
| 6 | -4.712149000 | -1.047782000 | -1.977824000 |
| 1 | -4.237186000 | -1.360674000 | -2.914208000 |
| 1 | -4.946811000 | -1.948876000 | -1.399593000 |
| 1 | -5.659499000 | -0.563475000 | -2.233517000 |
| 6 | -4.522167000 | 0.443759000  | 0.068137000  |
| 6 | -4.756137000 | 1.816687000  | 0.219453000  |
| 1 | -4.449524000 | 2.501770000  | -0.568913000 |
| 6 | -4.944642000 | -0.418572000 | 1.091233000  |
| 1 | -4.787032000 | -1.490699000 | 0.998711000  |
| 6 | -5.580847000 | 0.078137000  | 2.228857000  |
| 6 | -5.393997000 | 2.318466000  | 1.355840000  |
| 6 | -5.807315000 | 1.449565000  | 2.365691000  |
| 1 | -5.572962000 | 3.386349000  | 1.447342000  |
| 1 | -5.906069000 | -0.607301000 | 3.006803000  |
| 1 | -6.307639000 | 1.835480000  | 3.249236000  |

**85S**

E + ZPE = -2937.577144

|    |             |              |              |
|----|-------------|--------------|--------------|
| 28 | 0.011550000 | -0.134806000 | -0.664094000 |
| 15 | 2.094642000 | -0.733208000 | -0.045553000 |
| 6  | 2.168025000 | -1.596972000 | 1.636750000  |
| 1  | 2.985040000 | -1.107920000 | 2.180382000  |
| 6  | 2.594179000 | -3.044166000 | 1.303270000  |
| 1  | 2.998335000 | -3.535342000 | 2.195527000  |
| 1  | 1.712412000 | -3.622657000 | 0.994444000  |
| 6  | 3.609665000 | -2.997699000 | 0.155655000  |
| 1  | 3.829674000 | -3.998001000 | -0.234710000 |
| 1  | 4.562959000 | -2.581316000 | 0.505652000  |
| 6  | 3.011841000 | -2.110751000 | -0.956694000 |
| 1  | 2.215833000 | -2.691438000 | -1.434683000 |
| 6  | 3.992665000 | -1.663947000 | -2.043264000 |
| 1  | 4.817612000 | -1.073487000 | -1.634019000 |
| 1  | 3.499920000 | -1.063574000 | -2.816733000 |
| 1  | 4.421879000 | -2.543936000 | -2.535078000 |
| 6  | 0.898184000 | -1.502732000 | 2.485777000  |
| 1  | 0.037815000 | -1.955453000 | 1.980366000  |

|   |              |              |              |
|---|--------------|--------------|--------------|
| 1 | 0.644637000  | -0.465836000 | 2.732281000  |
| 1 | 1.043156000  | -2.036254000 | 3.432247000  |
| 6 | 3.278970000  | 0.679637000  | 0.064058000  |
| 6 | 4.536775000  | 0.517706000  | 0.668424000  |
| 1 | 4.812611000  | -0.434878000 | 1.108534000  |
| 6 | 5.462009000  | 1.560855000  | 0.711404000  |
| 1 | 6.429207000  | 1.404335000  | 1.179468000  |
| 6 | 5.139109000  | 2.797330000  | 0.155648000  |
| 1 | 5.850061000  | 3.617235000  | 0.187392000  |
| 6 | 3.886877000  | 2.981367000  | -0.428743000 |
| 1 | 3.625985000  | 3.951277000  | -0.844876000 |
| 6 | 2.956192000  | 1.938582000  | -0.487459000 |
| 6 | 1.615446000  | 2.203794000  | -1.126425000 |
| 1 | 1.476415000  | 1.648583000  | -2.058750000 |
| 1 | 1.501754000  | 3.269247000  | -1.353494000 |
| 8 | 0.502504000  | 1.804436000  | -0.291733000 |
| 6 | 0.400069000  | 2.544107000  | 0.941193000  |
| 1 | 0.404329000  | 3.616088000  | 0.720174000  |
| 1 | -0.551045000 | 2.270922000  | 1.396882000  |
| 1 | 1.227146000  | 2.299869000  | 1.614250000  |
| 6 | -1.945741000 | 0.490128000  | -0.533048000 |
| 6 | -2.350031000 | 0.034559000  | 0.865622000  |
| 1 | -2.502861000 | -1.053111000 | 0.878590000  |
| 1 | -2.806504000 | 0.440068000  | -1.196574000 |
| 1 | -1.616156000 | 1.531318000  | -0.582130000 |
| 6 | -0.184776000 | -1.812409000 | -1.564779000 |
| 6 | -1.414531000 | -1.142921000 | -1.793770000 |
| 1 | -1.578097000 | -0.643483000 | -2.745680000 |
| 1 | -0.198552000 | -2.704741000 | -0.938641000 |
| 1 | -1.556154000 | 0.231602000  | 1.598593000  |
| 1 | 0.530992000  | -1.861187000 | -2.384586000 |
| 1 | -2.312732000 | -1.585355000 | -1.377275000 |
| 6 | -3.656903000 | 0.715664000  | 1.368114000  |
| 1 | -3.503010000 | 1.802832000  | 1.314673000  |
| 6 | -3.913441000 | 0.354227000  | 2.843085000  |
| 1 | -3.074301000 | 0.665065000  | 3.477194000  |
| 1 | -4.817657000 | 0.849624000  | 3.209834000  |
| 1 | -4.050061000 | -0.725256000 | 2.973420000  |
| 6 | -4.848785000 | 0.381830000  | 0.480003000  |
| 6 | -5.517771000 | 1.391210000  | -0.224321000 |
| 1 | -5.181405000 | 2.421608000  | -0.129412000 |
| 6 | -5.309730000 | -0.937536000 | 0.346135000  |
| 1 | -4.822063000 | -1.742305000 | 0.892107000  |
| 6 | -6.404230000 | -1.235680000 | -0.465870000 |
| 6 | -6.615213000 | 1.097806000  | -1.036898000 |
| 6 | -7.061080000 | -0.217900000 | -1.161296000 |
| 1 | -7.121841000 | 1.898542000  | -1.568605000 |
| 1 | -6.749174000 | -2.262685000 | -0.550095000 |
| 1 | -7.915865000 | -0.449337000 | -1.790284000 |

**86R**

E + ZPE = -3168.586197

|    |              |              |              |
|----|--------------|--------------|--------------|
| 28 | -0.707291000 | -0.549035000 | 0.874782000  |
| 15 | 0.269811000  | 1.419368000  | 0.268662000  |
| 6  | 1.026490000  | 2.317163000  | 1.752566000  |
| 1  | 0.670236000  | 3.351429000  | 1.675028000  |
| 6  | 2.547511000  | 2.295273000  | 1.478408000  |
| 1  | 3.044677000  | 3.080853000  | 2.059059000  |
| 1  | 2.970613000  | 1.338364000  | 1.811275000  |
| 6  | 2.777354000  | 2.459279000  | -0.028958000 |
| 1  | 3.818183000  | 2.253154000  | -0.301441000 |
| 1  | 2.562117000  | 3.489458000  | -0.341889000 |

|   |              |              |              |
|---|--------------|--------------|--------------|
| 6 | 1.844263000  | 1.466959000  | -0.757618000 |
| 1 | 2.275457000  | 0.471264000  | -0.622397000 |
| 6 | 1.676474000  | 1.706686000  | -2.259572000 |
| 1 | 1.272245000  | 2.698999000  | -2.479970000 |
| 1 | 1.015915000  | 0.964253000  | -2.721727000 |
| 1 | 2.654210000  | 1.626212000  | -2.747409000 |
| 6 | 0.635012000  | 1.765195000  | 3.126227000  |
| 1 | 0.935150000  | 0.717612000  | 3.239512000  |
| 1 | -0.443550000 | 1.834435000  | 3.305594000  |
| 1 | 1.134099000  | 2.340004000  | 3.914859000  |
| 6 | -0.904244000 | 2.625485000  | -0.493920000 |
| 6 | -0.492750000 | 3.944955000  | -0.746448000 |
| 1 | 0.504193000  | 4.267229000  | -0.464303000 |
| 6 | -1.339861000 | 4.865732000  | -1.362801000 |
| 1 | -0.992044000 | 5.877223000  | -1.549957000 |
| 6 | -2.628542000 | 4.483111000  | -1.730717000 |
| 1 | -3.298417000 | 5.192842000  | -2.206490000 |
| 6 | -3.061193000 | 3.184921000  | -1.465076000 |
| 1 | -4.074208000 | 2.891820000  | -1.729529000 |
| 6 | -2.215752000 | 2.249492000  | -0.858826000 |
| 6 | -2.751002000 | 0.864011000  | -0.588571000 |
| 1 | -2.287409000 | 0.102129000  | -1.221501000 |
| 1 | -3.831287000 | 0.821810000  | -0.763567000 |
| 8 | -2.496791000 | 0.423813000  | 0.764991000  |
| 6 | -3.154714000 | 1.219142000  | 1.767210000  |
| 1 | -4.235558000 | 1.192936000  | 1.594398000  |
| 1 | -2.925655000 | 0.771442000  | 2.733931000  |
| 1 | -2.799547000 | 2.253415000  | 1.744390000  |
| 6 | 2.644238000  | -2.870631000 | -0.552122000 |
| 6 | 0.983566000  | -1.446597000 | 0.827848000  |
| 6 | 1.291764000  | -2.094645000 | -0.527100000 |
| 1 | 0.504759000  | -2.811776000 | -0.793791000 |
| 1 | 1.298666000  | -1.351903000 | -1.336575000 |
| 1 | 2.646532000  | -3.529187000 | 0.327384000  |
| 1 | 0.983375000  | -2.224439000 | 1.602935000  |
| 1 | 1.794099000  | -0.761465000 | 1.102306000  |
| 6 | -1.695494000 | -2.460215000 | 1.056805000  |
| 6 | -1.520141000 | -1.809228000 | 2.263256000  |
| 1 | -0.914913000 | -3.149186000 | 0.748535000  |
| 1 | -0.711516000 | -2.098350000 | 2.926944000  |
| 1 | -2.351719000 | -1.301778000 | 2.744179000  |
| 6 | -2.926114000 | -2.555671000 | 0.254210000  |
| 6 | -2.841809000 | -3.073202000 | -1.052279000 |
| 1 | -1.875297000 | -3.385459000 | -1.440904000 |
| 6 | -4.192728000 | -2.193098000 | 0.749946000  |
| 1 | -4.293031000 | -1.838214000 | 1.771049000  |
| 6 | -5.329513000 | -2.326817000 | -0.042049000 |
| 6 | -3.978947000 | -3.200255000 | -1.847920000 |
| 6 | -5.226071000 | -2.823884000 | -1.345717000 |
| 1 | -3.893927000 | -3.604003000 | -2.852481000 |
| 1 | -6.302426000 | -2.061725000 | 0.362032000  |
| 1 | -6.116243000 | -2.934247000 | -1.958054000 |
| 6 | 3.846335000  | -1.943653000 | -0.420486000 |
| 6 | 4.317871000  | -1.191393000 | -1.508431000 |
| 1 | 3.837846000  | -1.283172000 | -2.479482000 |
| 6 | 4.513669000  | -1.813716000 | 0.806238000  |
| 1 | 4.180046000  | -2.402360000 | 1.658112000  |
| 6 | 5.610079000  | -0.959917000 | 0.948359000  |
| 6 | 5.416027000  | -0.339063000 | -1.373424000 |
| 6 | 6.065652000  | -0.217817000 | -0.142548000 |
| 1 | 5.775157000  | 0.217268000  | -2.235465000 |
| 1 | 6.116817000  | -0.887781000 | 1.906983000  |
| 1 | 6.928116000  | 0.434823000  | -0.040155000 |
| 6 | 2.720208000  | -3.770537000 | -1.798899000 |

|                        |              |              |              |
|------------------------|--------------|--------------|--------------|
| 1                      | 3.672176000  | -4.309423000 | -1.836279000 |
| 1                      | 1.911985000  | -4.510624000 | -1.787967000 |
| 1                      | 2.625544000  | -3.194288000 | -2.726459000 |
| .....                  |              |              |              |
| <b>86S</b>             |              |              |              |
| E + ZPE = -3168.585274 |              |              |              |
| 28                     | 0.475342000  | -0.780136000 | -0.552147000 |
| 15                     | 0.132308000  | 1.390827000  | 0.049158000  |
| 6                      | -1.179508000 | 2.313755000  | -0.949128000 |
| 1                      | -0.718454000 | 3.274512000  | -1.205601000 |
| 6                      | -2.329042000 | 2.563011000  | 0.056698000  |
| 1                      | -2.941219000 | 3.408828000  | -0.276868000 |
| 1                      | -2.991500000 | 1.690263000  | 0.087235000  |
| 6                      | -1.727595000 | 2.809937000  | 1.447602000  |
| 1                      | -2.499137000 | 2.792286000  | 2.225809000  |
| 1                      | -1.257099000 | 3.800890000  | 1.493974000  |
| 6                      | -0.672342000 | 1.713270000  | 1.720854000  |
| 1                      | -1.207615000 | 0.782439000  | 1.936993000  |
| 6                      | 0.284955000  | 1.998023000  | 2.880424000  |
| 1                      | 0.867486000  | 2.909742000  | 2.718396000  |
| 1                      | 0.987129000  | 1.171896000  | 3.041065000  |
| 1                      | -0.288181000 | 2.126728000  | 3.805431000  |
| 6                      | -1.615080000 | 1.629002000  | -2.248450000 |
| 1                      | -2.073540000 | 0.653626000  | -2.058159000 |
| 1                      | -0.775303000 | 1.489754000  | -2.938823000 |
| 1                      | -2.360383000 | 2.247516000  | -2.761451000 |
| 6                      | 1.639249000  | 2.458453000  | -0.023125000 |
| 6                      | 1.520796000  | 3.850717000  | 0.131716000  |
| 1                      | 0.544414000  | 4.301846000  | 0.273611000  |
| 6                      | 2.638966000  | 4.683671000  | 0.117393000  |
| 1                      | 2.514964000  | 5.754754000  | 0.245800000  |
| 6                      | 3.907254000  | 4.136515000  | -0.066892000 |
| 1                      | 4.784850000  | 4.775429000  | -0.087920000 |
| 6                      | 4.041087000  | 2.760258000  | -0.240444000 |
| 1                      | 5.027949000  | 2.333070000  | -0.400711000 |
| 6                      | 2.927668000  | 1.912716000  | -0.211133000 |
| 6                      | 3.161448000  | 0.430004000  | -0.373363000 |
| 1                      | 3.006376000  | -0.122111000 | 0.556688000  |
| 1                      | 4.188224000  | 0.236954000  | -0.701594000 |
| 8                      | 2.267613000  | -0.196945000 | -1.322016000 |
| 6                      | 2.397454000  | 0.297247000  | -2.667530000 |
| 1                      | 3.437579000  | 0.191312000  | -2.992659000 |
| 1                      | 1.751302000  | -0.316346000 | -3.295896000 |
| 1                      | 2.094783000  | 1.346605000  | -2.732592000 |
| 6                      | -3.475085000 | -2.473473000 | 0.362091000  |
| 6                      | -1.246800000 | -1.203448000 | 0.198884000  |
| 6                      | -2.122925000 | -2.313608000 | -0.388154000 |
| 1                      | -2.336933000 | -2.111330000 | -1.446824000 |
| 1                      | -1.623705000 | -3.290095000 | -0.354696000 |
| 1                      | -3.236801000 | -2.627248000 | 1.424001000  |
| 1                      | -1.862547000 | -0.299321000 | 0.198980000  |
| 1                      | -1.038003000 | -1.419248000 | 1.261392000  |
| 6                      | 1.113902000  | -2.787762000 | -0.258373000 |
| 6                      | 0.751787000  | -2.541609000 | -1.569319000 |
| 1                      | 0.350951000  | -3.176208000 | -0.410507000 |
| 1                      | -0.216210000 | -2.858940000 | -1.937471000 |
| 1                      | 1.513672000  | -2.376667000 | -2.325262000 |
| 6                      | 2.475933000  | -2.852166000 | 0.297945000  |
| 6                      | 2.635479000  | -2.822780000 | 1.696741000  |
| 1                      | 1.755121000  | -2.750664000 | 2.331650000  |
| 6                      | 3.622575000  | -2.987041000 | -0.506582000 |
| 1                      | 3.521103000  | -3.061395000 | -1.584914000 |



|   |              |              |              |
|---|--------------|--------------|--------------|
| 6 | 4.886613000  | -3.068678000 | 0.071769000  |
| 6 | 3.901673000  | -2.893320000 | 2.274332000  |
| 6 | 5.031420000  | -3.013812000 | 1.461943000  |
| 1 | 4.006103000  | -2.869545000 | 3.355012000  |
| 1 | 5.761382000  | -3.193075000 | -0.560139000 |
| 1 | 6.018712000  | -3.083890000 | 1.908983000  |
| 6 | -4.357525000 | -1.235159000 | 0.271056000  |
| 6 | -4.836099000 | -0.769189000 | -0.964192000 |
| 1 | -4.569759000 | -1.292209000 | -1.879904000 |
| 6 | -4.743652000 | -0.545642000 | 1.428647000  |
| 1 | -4.397907000 | -0.898364000 | 2.398223000  |
| 6 | -5.582280000 | 0.570283000  | 1.360973000  |
| 6 | -5.671744000 | 0.346014000  | -1.038226000 |
| 6 | -6.049285000 | 1.020808000  | 0.125504000  |
| 1 | -6.039335000 | 0.680694000  | -2.004723000 |
| 1 | -5.879212000 | 1.078315000  | 2.274797000  |
| 1 | -6.709599000 | 1.881694000  | 0.069399000  |
| 6 | -4.216868000 | -3.730800000 | -0.132782000 |
| 1 | -4.462217000 | -3.658509000 | -1.198651000 |
| 1 | -3.602700000 | -4.627580000 | 0.009855000  |
| 1 | -5.154397000 | -3.870615000 | 0.414660000  |

**87**  
E + ZPE = -2859.051980

|    |              |              |              |
|----|--------------|--------------|--------------|
| 28 | 1.063580000  | -0.663436000 | -0.063619000 |
| 15 | -1.142505000 | -0.858969000 | -0.128159000 |
| 6  | -1.744806000 | -2.141503000 | -1.365833000 |
| 1  | -2.690907000 | -1.770371000 | -1.766768000 |
| 6  | -1.994727000 | -3.385188000 | -0.483784000 |
| 1  | -2.607505000 | -4.114313000 | -1.025787000 |
| 1  | -1.036722000 | -3.880061000 | -0.266794000 |
| 6  | -2.656257000 | -2.937474000 | 0.824389000  |
| 1  | -2.705713000 | -3.751506000 | 1.556711000  |
| 1  | -3.689821000 | -2.623278000 | 0.633839000  |
| 6  | -1.844758000 | -1.752461000 | 1.393359000  |
| 1  | -0.961883000 | -2.165498000 | 1.893730000  |
| 6  | -2.596260000 | -0.877338000 | 2.398983000  |
| 1  | -3.487336000 | -0.421490000 | 1.956705000  |
| 1  | -1.969752000 | -0.068043000 | 2.788728000  |
| 1  | -2.919979000 | -1.488508000 | 3.249277000  |
| 6  | -0.820120000 | -2.414851000 | -2.553890000 |
| 1  | 0.170981000  | -2.755298000 | -2.231947000 |
| 1  | -0.694594000 | -1.529530000 | -3.182845000 |
| 1  | -1.254850000 | -3.204510000 | -3.177394000 |
| 6  | -1.997050000 | 0.777795000  | -0.270948000 |
| 6  | -2.857093000 | 0.868061000  | -1.380991000 |
| 1  | -2.991558000 | -0.004258000 | -2.012414000 |
| 6  | -3.551064000 | 2.035297000  | -1.690793000 |
| 1  | -4.202002000 | 2.064929000  | -2.559625000 |
| 6  | -3.406925000 | 3.151504000  | -0.872509000 |
| 1  | -3.945507000 | 4.069514000  | -1.087487000 |
| 6  | -2.556738000 | 3.082189000  | 0.228652000  |
| 1  | -2.440031000 | 3.955155000  | 0.865006000  |
| 6  | -1.834268000 | 1.924231000  | 0.547221000  |
| 6  | -0.938693000 | 2.013036000  | 1.764531000  |
| 1  | -0.984593000 | 1.058533000  | 2.308428000  |
| 1  | -1.278827000 | 2.790182000  | 2.465983000  |
| 8  | 0.396327000  | 2.269367000  | 1.351552000  |
| 6  | 0.552539000  | 3.561644000  | 0.778055000  |
| 1  | -0.158548000 | 4.277805000  | 1.213835000  |
| 1  | 1.571058000  | 3.885168000  | 1.001506000  |
| 1  | 0.408768000  | 3.543942000  | -0.313305000 |

|   |             |              |              |
|---|-------------|--------------|--------------|
| 1 | 4.147263000 | 2.510346000  | 0.048990000  |
| 6 | 4.539264000 | 1.840480000  | -0.724884000 |
| 6 | 3.517479000 | 0.773205000  | -1.135397000 |
| 1 | 5.462250000 | 1.388412000  | -0.347427000 |
| 1 | 4.798515000 | 2.460179000  | -1.589088000 |
| 1 | 3.961807000 | 0.159158000  | -1.929218000 |
| 6 | 3.096447000 | -0.171454000 | -0.018897000 |
| 6 | 2.580517000 | 0.334895000  | 1.203461000  |
| 6 | 3.011597000 | -1.568248000 | -0.273563000 |
| 1 | 2.672505000 | 1.390188000  | 1.435893000  |
| 1 | 3.426700000 | -1.961522000 | -1.196136000 |
| 6 | 1.896393000 | -0.516944000 | 2.080729000  |
| 6 | 2.361999000 | -2.429968000 | 0.625430000  |
| 1 | 1.459603000 | -0.123770000 | 2.992792000  |
| 1 | 2.296195000 | -3.492758000 | 0.418957000  |
| 6 | 1.764558000 | -1.889421000 | 1.777022000  |
| 1 | 1.220294000 | -2.536831000 | 2.455879000  |
| 6 | 1.106738000 | 0.270477000  | -1.762856000 |
| 6 | 2.185155000 | 1.357996000  | -1.669079000 |
| 1 | 2.340559000 | 1.828506000  | -2.650903000 |
| 1 | 1.855116000 | 2.159949000  | -0.995108000 |
| 1 | 0.149266000 | 0.701471000  | -2.061523000 |
| 1 | 1.382406000 | -0.481855000 | -2.511622000 |

**88**  
E + ZPE = -2859.041251

|    |              |              |              |
|----|--------------|--------------|--------------|
| 28 | 0.958602000  | 0.215207000  | 0.091078000  |
| 15 | -1.187721000 | 0.796036000  | 0.142564000  |
| 6  | -1.745138000 | 2.118552000  | 1.338049000  |
| 1  | -2.843638000 | 2.105389000  | 1.304842000  |
| 6  | -1.270973000 | 3.385693000  | 0.600381000  |
| 1  | -1.653163000 | 4.283485000  | 1.098714000  |
| 1  | -0.174416000 | 3.445755000  | 0.641874000  |
| 6  | -1.764736000 | 3.296223000  | -0.851455000 |
| 1  | -1.224265000 | 3.988099000  | -1.505461000 |
| 1  | -2.819377000 | 3.593365000  | -0.884158000 |
| 6  | -1.653535000 | 1.832690000  | -1.386542000 |
| 1  | -0.811231000 | 1.758322000  | -2.083416000 |
| 6  | -2.937576000 | 1.407157000  | -2.112431000 |
| 1  | -3.801073000 | 1.421575000  | -1.439163000 |
| 1  | -2.875806000 | 0.408461000  | -2.551967000 |
| 1  | -3.137926000 | 2.113947000  | -2.926108000 |
| 6  | -1.290834000 | 2.038652000  | 2.795974000  |
| 1  | -0.210459000 | 2.183412000  | 2.886467000  |
| 1  | -1.545751000 | 1.083655000  | 3.265756000  |
| 1  | -1.777595000 | 2.833062000  | 3.372489000  |
| 6  | -2.317372000 | -0.644711000 | 0.245463000  |
| 6  | -3.311694000 | -0.723909000 | 1.228802000  |
| 1  | -3.448576000 | 0.085086000  | 1.938775000  |
| 6  | -4.149286000 | -1.839448000 | 1.314669000  |
| 1  | -4.915385000 | -1.879309000 | 2.083201000  |
| 6  | -4.001851000 | -2.888414000 | 0.412145000  |
| 1  | -4.652217000 | -3.756097000 | 0.467375000  |
| 6  | -3.007151000 | -2.822826000 | -0.566933000 |
| 1  | -2.894322000 | -3.643188000 | -1.271572000 |
| 6  | -2.154116000 | -1.720680000 | -0.661751000 |
| 6  | -1.075852000 | -1.703180000 | -1.727463000 |
| 1  | -1.095942000 | -0.780785000 | -2.313654000 |
| 1  | -1.223135000 | -2.536514000 | -2.426002000 |
| 8  | 0.259033000  | -1.768790000 | -1.195374000 |
| 6  | 0.617042000  | -3.087492000 | -0.770600000 |
| 1  | 0.461994000  | -3.804872000 | -1.586621000 |

|   |             |              |              |
|---|-------------|--------------|--------------|
| 1 | 1.676739000 | -3.062566000 | -0.515917000 |
| 1 | 0.034519000 | -3.400505000 | 0.103839000  |
| 1 | 4.671030000 | -2.229711000 | 1.027866000  |
| 6 | 4.785766000 | -1.277744000 | 1.559053000  |
| 6 | 3.510765000 | -0.428202000 | 1.503321000  |
| 1 | 5.641063000 | -0.747936000 | 1.126921000  |
| 1 | 5.029359000 | -1.517906000 | 2.598950000  |
| 1 | 3.668723000 | 0.457891000  | 2.133729000  |
| 6 | 3.139603000 | 0.081516000  | 0.112862000  |
| 6 | 3.372927000 | -0.678003000 | -1.067572000 |
| 6 | 2.623615000 | 1.400713000  | -0.026020000 |
| 1 | 3.855321000 | -1.646869000 | -0.985539000 |
| 1 | 2.654228000 | 2.090246000  | 0.813137000  |
| 6 | 2.994679000 | -0.206962000 | -2.313590000 |
| 6 | 2.222597000 | 1.866083000  | -1.304301000 |
| 1 | 3.168361000 | -0.806569000 | -3.201181000 |
| 1 | 1.835000000 | 2.875141000  | -1.408139000 |
| 6 | 2.378467000 | 1.056993000  | -2.426202000 |
| 1 | 2.071354000 | 1.422818000  | -3.401821000 |
| 6 | 1.005313000 | -0.333201000 | 1.902642000  |
| 6 | 2.274048000 | -1.172165000 | 2.056071000  |
| 1 | 2.423981000 | -1.417882000 | 3.118644000  |
| 1 | 2.171649000 | -2.133136000 | 1.536177000  |
| 1 | 0.114522000 | -0.902451000 | 2.190612000  |
| 1 | 1.060893000 | 0.556564000  | 2.538279000  |

**89**  
E + ZPE = -2859.056653

|    |              |              |              |
|----|--------------|--------------|--------------|
| 28 | 0.840853000  | -0.216149000 | 0.159230000  |
| 15 | -1.262908000 | -0.773227000 | 0.058016000  |
| 6  | -1.830383000 | -2.019231000 | -1.243778000 |
| 1  | -2.742953000 | -1.585230000 | -1.667337000 |
| 6  | -2.217418000 | -3.281331000 | -0.435327000 |
| 1  | -2.915654000 | -3.898282000 | -1.012482000 |
| 1  | -1.325061000 | -3.896365000 | -0.261748000 |
| 6  | -2.819450000 | -2.844500000 | 0.908706000  |
| 1  | -2.926096000 | -3.690744000 | 1.596983000  |
| 1  | -3.826870000 | -2.435022000 | 0.759940000  |
| 6  | -1.899141000 | -1.766619000 | 1.526021000  |
| 1  | -1.002613000 | -2.267637000 | 1.908668000  |
| 6  | -2.519192000 | -0.952311000 | 2.663411000  |
| 1  | -3.407915000 | -0.403605000 | 2.337466000  |
| 1  | -1.808556000 | -0.229818000 | 3.080933000  |
| 1  | -2.819217000 | -1.623978000 | 3.475399000  |
| 6  | -0.855593000 | -2.274404000 | -2.396901000 |
| 1  | 0.089928000  | -2.700023000 | -2.048522000 |
| 1  | -0.633974000 | -1.356213000 | -2.952096000 |
| 1  | -1.297553000 | -2.984994000 | -3.104677000 |
| 6  | -2.404020000 | 0.671342000  | -0.146656000 |
| 6  | -3.775369000 | 0.448710000  | -0.365346000 |
| 1  | -4.160879000 | -0.563564000 | -0.420657000 |
| 6  | -4.675388000 | 1.504207000  | -0.505230000 |
| 1  | -5.728922000 | 1.296414000  | -0.666038000 |
| 6  | -4.215055000 | 2.817837000  | -0.444169000 |
| 1  | -4.903050000 | 3.649307000  | -0.562728000 |
| 6  | -2.857783000 | 3.057874000  | -0.241691000 |
| 1  | -2.494724000 | 4.082106000  | -0.205923000 |
| 6  | -1.948225000 | 2.006193000  | -0.078468000 |
| 6  | -0.507785000 | 2.368592000  | 0.199853000  |
| 1  | -0.238571000 | 2.194790000  | 1.244664000  |
| 1  | -0.336277000 | 3.429344000  | -0.014427000 |
| 8  | 0.452331000  | 1.601797000  | -0.555282000 |

|   |              |              |              |
|---|--------------|--------------|--------------|
| 6 | 0.395778000  | 1.824489000  | -1.976029000 |
| 1 | 0.528289000  | 2.892740000  | -2.175694000 |
| 1 | 1.221065000  | 1.265517000  | -2.415200000 |
| 1 | -0.558873000 | 1.485168000  | -2.390111000 |
| 1 | 4.649769000  | -1.309520000 | -1.878418000 |
| 6 | 4.904454000  | -1.529659000 | -0.834799000 |
| 6 | 3.701060000  | -1.357848000 | 0.100052000  |
| 1 | 5.742854000  | -0.888260000 | -0.544309000 |
| 1 | 5.250106000  | -2.567874000 | -0.800274000 |
| 1 | 4.019631000  | -1.673073000 | 1.103682000  |
| 6 | 3.222332000  | 0.089899000  | 0.257605000  |
| 6 | 3.623573000  | 1.116275000  | -0.628755000 |
| 6 | 2.580114000  | 0.480651000  | 1.461937000  |
| 1 | 4.140039000  | 0.856858000  | -1.547207000 |
| 1 | 2.440582000  | -0.253953000 | 2.249087000  |
| 6 | 3.450779000  | 2.456981000  | -0.305103000 |
| 6 | 2.449543000  | 1.844374000  | 1.800455000  |
| 1 | 3.808268000  | 3.222854000  | -0.988172000 |
| 1 | 2.048687000  | 2.113384000  | 2.774203000  |
| 6 | 2.880244000  | 2.828056000  | 0.922466000  |
| 1 | 2.808922000  | 3.877247000  | 1.194957000  |
| 6 | 1.283405000  | -2.021814000 | 0.534123000  |
| 6 | 2.533263000  | -2.272903000 | -0.308858000 |
| 1 | 2.845712000  | -3.324910000 | -0.228032000 |
| 1 | 2.313960000  | -2.111997000 | -1.375506000 |
| 1 | 0.517623000  | -2.754428000 | 0.262824000  |
| 1 | 1.484970000  | -2.179199000 | 1.603201000  |

**90**  
E + ZPE = -2859.049102

|    |              |              |              |
|----|--------------|--------------|--------------|
| 28 | 0.670952000  | -0.448479000 | -0.306761000 |
| 15 | -1.376548000 | -0.758527000 | 0.093075000  |
| 6  | -2.273853000 | -2.023936000 | -0.976177000 |
| 1  | -3.238485000 | -1.562293000 | -1.216515000 |
| 6  | -2.530972000 | -3.206348000 | -0.015032000 |
| 1  | -3.325091000 | -3.850316000 | -0.409487000 |
| 1  | -1.628394000 | -3.827018000 | 0.062273000  |
| 6  | -2.888318000 | -2.632630000 | 1.364815000  |
| 1  | -2.925791000 | -3.413478000 | 2.132798000  |
| 1  | -3.884809000 | -2.171737000 | 1.335487000  |
| 6  | -1.827521000 | -1.570121000 | 1.729476000  |
| 1  | -0.907674000 | -2.095659000 | 2.013298000  |
| 6  | -2.208412000 | -0.614109000 | 2.861353000  |
| 1  | -3.111451000 | -0.041985000 | 2.627566000  |
| 1  | -1.404187000 | 0.098618000  | 3.076852000  |
| 1  | -2.399902000 | -1.182866000 | 3.777932000  |
| 6  | -1.588871000 | -2.394693000 | -2.293846000 |
| 1  | -0.606856000 | -2.850726000 | -2.132590000 |
| 1  | -1.457699000 | -1.520450000 | -2.941425000 |
| 1  | -2.203593000 | -3.117846000 | -2.841812000 |
| 6  | -2.350748000 | 0.801620000  | -0.079653000 |
| 6  | -3.754925000 | 0.752203000  | -0.057655000 |
| 1  | -4.263910000 | -0.196724000 | 0.078028000  |
| 6  | -4.529109000 | 1.903668000  | -0.196654000 |
| 1  | -5.612186000 | 1.832355000  | -0.167767000 |
| 6  | -3.906071000 | 3.136086000  | -0.379301000 |
| 1  | -4.496395000 | 4.038928000  | -0.502284000 |
| 6  | -2.514170000 | 3.202887000  | -0.410329000 |
| 1  | -2.028752000 | 4.164871000  | -0.555115000 |
| 6  | -1.724322000 | 2.058164000  | -0.248065000 |
| 6  | -0.224864000 | 2.251177000  | -0.194476000 |
| 1  | 0.174767000  | 2.076650000  | 0.806415000  |

|   |              |              |              |
|---|--------------|--------------|--------------|
| 1 | 0.036620000  | 3.274210000  | -0.483174000 |
| 8 | 0.532189000  | 1.349626000  | -1.039954000 |
| 6 | 0.366373000  | 1.580054000  | -2.453120000 |
| 1 | 0.630906000  | 2.617773000  | -2.677849000 |
| 1 | 1.055146000  | 0.907422000  | -2.964843000 |
| 1 | -0.663505000 | 1.379511000  | -2.764116000 |
| 1 | 4.888174000  | -1.148040000 | -1.759531000 |
| 6 | 4.971638000  | -1.592480000 | -0.760703000 |
| 6 | 3.689034000  | -1.411712000 | 0.063677000  |
| 1 | 5.834692000  | -1.141535000 | -0.261144000 |
| 1 | 5.180242000  | -2.658590000 | -0.897642000 |
| 1 | 3.802436000  | -1.997854000 | 0.985241000  |
| 6 | 3.413019000  | 0.032484000  | 0.477578000  |
| 6 | 3.861326000  | 1.125807000  | -0.283774000 |
| 6 | 2.731028000  | 0.306698000  | 1.679241000  |
| 1 | 4.411099000  | 0.955135000  | -1.204364000 |
| 1 | 2.430056000  | -0.515533000 | 2.322688000  |
| 6 | 3.653466000  | 2.437341000  | 0.144491000  |
| 6 | 2.533370000  | 1.621373000  | 2.117537000  |
| 1 | 4.034811000  | 3.262435000  | -0.451001000 |
| 1 | 2.048038000  | 1.801607000  | 3.073198000  |
| 6 | 2.996994000  | 2.691269000  | 1.351675000  |
| 1 | 2.868596000  | 3.711926000  | 1.701137000  |
| 6 | 1.201633000  | -2.160093000 | 0.158889000  |
| 6 | 2.466189000  | -1.985404000 | -0.688482000 |
| 1 | 2.726759000  | -2.927169000 | -1.190645000 |
| 1 | 2.257963000  | -1.294985000 | -1.544889000 |
| 1 | 0.593641000  | -2.994657000 | -0.201420000 |
| 1 | 1.417291000  | -2.329493000 | 1.218736000  |

**91**  
E + ZPE = -2859.056252

|    |              |              |              |
|----|--------------|--------------|--------------|
| 28 | -0.508828000 | 0.413020000  | -0.923591000 |
| 15 | 1.306916000  | 0.790419000  | 0.123545000  |
| 6  | 2.330910000  | 2.236357000  | -0.505502000 |
| 1  | 3.371963000  | 1.893271000  | -0.499492000 |
| 6  | 2.163267000  | 3.304395000  | 0.598582000  |
| 1  | 2.950758000  | 4.061899000  | 0.516764000  |
| 1  | 1.205099000  | 3.824911000  | 0.466079000  |
| 6  | 2.185448000  | 2.591605000  | 1.958559000  |
| 1  | 1.924460000  | 3.269149000  | 2.779301000  |
| 1  | 3.194982000  | 2.213451000  | 2.169771000  |
| 6  | 1.184986000  | 1.415794000  | 1.894324000  |
| 1  | 0.172202000  | 1.831153000  | 1.951845000  |
| 6  | 1.336807000  | 0.357749000  | 2.988569000  |
| 1  | 2.318558000  | -0.124797000 | 2.958363000  |
| 1  | 0.570641000  | -0.421316000 | 2.907746000  |
| 1  | 1.225062000  | 0.827623000  | 3.972029000  |
| 6  | 1.992893000  | 2.713140000  | -1.920488000 |
| 1  | 0.949805000  | 3.035805000  | -2.000315000 |
| 1  | 2.165386000  | 1.928080000  | -2.665282000 |
| 1  | 2.627590000  | 3.564987000  | -2.189671000 |
| 6  | 2.412760000  | -0.684936000 | 0.099723000  |
| 6  | 3.762114000  | -0.564179000 | 0.469613000  |
| 1  | 4.156047000  | 0.397329000  | 0.783558000  |
| 6  | 4.622994000  | -1.661692000 | 0.458541000  |
| 1  | 5.659565000  | -1.537589000 | 0.757003000  |
| 6  | 4.147091000  | -2.908519000 | 0.059703000  |
| 1  | 4.808975000  | -3.768786000 | 0.035883000  |
| 6  | 2.811225000  | -3.045801000 | -0.315156000 |
| 1  | 2.441498000  | -4.019627000 | -0.626392000 |
| 6  | 1.931165000  | -1.957437000 | -0.289811000 |

|   |              |              |              |
|---|--------------|--------------|--------------|
| 6 | 0.482000000  | -2.223212000 | -0.633621000 |
| 1 | -0.182883000 | -2.084261000 | 0.223153000  |
| 1 | 0.361177000  | -3.252380000 | -0.987432000 |
| 8 | -0.067278000 | -1.344161000 | -1.650859000 |
| 6 | 0.504227000  | -1.515076000 | -2.964762000 |
| 1 | 0.396859000  | -2.561474000 | -3.266404000 |
| 1 | -0.066772000 | -0.877243000 | -3.640440000 |
| 1 | 1.560003000  | -1.228480000 | -2.973464000 |
| 1 | -4.282573000 | -0.586941000 | -2.353350000 |
| 6 | -4.710775000 | 0.287637000  | -1.849109000 |
| 6 | -3.776565000 | 0.837283000  | -0.758832000 |
| 1 | -5.671198000 | -0.013806000 | -1.420673000 |
| 1 | -4.904249000 | 1.049026000  | -2.612888000 |
| 1 | -4.239462000 | 1.743195000  | -0.347766000 |
| 6 | -3.564730000 | -0.133197000 | 0.395467000  |
| 6 | -3.179994000 | -1.465651000 | 0.171018000  |
| 6 | -3.740388000 | 0.289145000  | 1.720282000  |
| 1 | -3.073518000 | -1.838399000 | -0.844986000 |
| 1 | -4.060857000 | 1.309980000  | 1.916347000  |
| 6 | -2.972933000 | -2.342174000 | 1.239054000  |
| 6 | -3.529309000 | -0.582621000 | 2.791143000  |
| 1 | -2.704169000 | -3.377093000 | 1.042732000  |
| 1 | -3.681667000 | -0.233071000 | 3.808434000  |
| 6 | -3.140806000 | -1.901582000 | 2.554229000  |
| 1 | -2.989859000 | -2.585983000 | 3.384048000  |
| 6 | -1.433097000 | 1.938301000  | -0.429107000 |
| 6 | -2.428209000 | 1.304598000  | -1.364617000 |
| 1 | -2.587566000 | 1.917322000  | -2.258409000 |
| 1 | -1.969168000 | 0.352695000  | -1.835601000 |
| 1 | -1.061300000 | 2.910597000  | -0.758556000 |
| 1 | -1.750202000 | 1.973644000  | 0.615514000  |

**92**  
E + ZPE= -3168.567945

|    |              |              |              |
|----|--------------|--------------|--------------|
| 28 | -0.415321000 | -0.188354000 | -0.125895000 |
| 15 | 1.297972000  | -1.456395000 | -0.394107000 |
| 6  | 0.984836000  | -3.315914000 | -0.536124000 |
| 1  | 1.762014000  | -3.781699000 | 0.080402000  |
| 6  | 1.282544000  | -3.644172000 | -2.015353000 |
| 1  | 1.466718000  | -4.717836000 | -2.136641000 |
| 1  | 0.408504000  | -3.402716000 | -2.634888000 |
| 6  | 2.486563000  | -2.802639000 | -2.459245000 |
| 1  | 2.643823000  | -2.855169000 | -3.542660000 |
| 1  | 3.403997000  | -3.183225000 | -1.990647000 |
| 6  | 2.245182000  | -1.341036000 | -2.020736000 |
| 1  | 1.509580000  | -0.896773000 | -2.703497000 |
| 6  | 3.495814000  | -0.459701000 | -2.008761000 |
| 1  | 4.264162000  | -0.855143000 | -1.337395000 |
| 1  | 3.271892000  | 0.565669000  | -1.697496000 |
| 1  | 3.925032000  | -0.416209000 | -3.016430000 |
| 6  | -0.370357000 | -3.819141000 | -0.034144000 |
| 1  | -1.199642000 | -3.417423000 | -0.624146000 |
| 1  | -0.540424000 | -3.559971000 | 1.016771000  |
| 1  | -0.411742000 | -4.911774000 | -0.111170000 |
| 6  | 2.506573000  | -1.313093000 | 1.001469000  |
| 6  | 3.593591000  | -2.201534000 | 1.072245000  |
| 1  | 3.730397000  | -2.952476000 | 0.300895000  |
| 6  | 4.521753000  | -2.143796000 | 2.110921000  |
| 1  | 5.354365000  | -2.840539000 | 2.130462000  |
| 6  | 4.368560000  | -1.195919000 | 3.120185000  |
| 1  | 5.075404000  | -1.147269000 | 3.942897000  |
| 6  | 3.293141000  | -0.311441000 | 3.070936000  |

|   |              |              |              |
|---|--------------|--------------|--------------|
| 1 | 3.172505000  | 0.425969000  | 3.860710000  |
| 6 | 2.367378000  | -0.342918000 | 2.020336000  |
| 6 | 1.300771000  | 0.729561000  | 2.011977000  |
| 1 | 1.479452000  | 1.465739000  | 1.225832000  |
| 1 | 1.293926000  | 1.257448000  | 2.971826000  |
| 8 | -0.045014000 | 0.253871000  | 1.767284000  |
| 6 | -0.569215000 | -0.591482000 | 2.811169000  |
| 1 | -0.476333000 | -0.073319000 | 3.770703000  |
| 1 | -1.622806000 | -0.757851000 | 2.585033000  |
| 1 | -0.031975000 | -1.543901000 | 2.846988000  |
| 1 | -5.267229000 | -0.343036000 | -2.904390000 |
| 6 | -4.385290000 | -0.844647000 | -2.494858000 |
| 6 | -3.785833000 | -1.021951000 | -1.339691000 |
| 1 | -3.658033000 | -0.975607000 | -3.303830000 |
| 1 | -4.696045000 | -1.839317000 | -2.155751000 |
| 1 | -3.491448000 | 0.952657000  | -1.752646000 |
| 6 | -4.786670000 | 0.236850000  | -0.222696000 |
| 6 | -5.362754000 | -0.819290000 | 0.500480000  |
| 6 | -5.147854000 | 1.547535000  | 0.115995000  |
| 1 | -5.114761000 | -1.848615000 | 0.251071000  |
| 1 | -4.725227000 | 2.380912000  | -0.441958000 |
| 6 | -6.269973000 | -0.570445000 | 1.530495000  |
| 6 | -6.057282000 | 1.800983000  | 1.145181000  |
| 1 | -6.710271000 | -1.402356000 | 2.073478000  |
| 1 | -6.329158000 | 2.825372000  | 1.384506000  |
| 6 | -6.620081000 | 0.741716000  | 1.857024000  |
| 1 | -7.331049000 | 0.935105000  | 2.655147000  |
| 6 | -1.283021000 | -0.699828000 | -1.703472000 |
| 6 | -2.503486000 | -0.714256000 | -0.807895000 |
| 1 | -2.257777000 | -0.172690000 | 0.161044000  |
| 1 | -2.744874000 | -1.730313000 | -0.480078000 |
| 1 | -1.056585000 | -1.661275000 | -2.165027000 |
| 1 | -1.295672000 | 0.077882000  | -2.475225000 |
| 6 | 0.045172000  | 2.527625000  | -1.196363000 |
| 6 | -0.981058000 | 2.295956000  | -0.346272000 |
| 1 | -0.074050000 | 2.205546000  | -2.230496000 |
| 1 | -1.940027000 | 1.972182000  | -0.731610000 |
| 1 | -0.971588000 | 2.634157000  | 0.685639000  |
| 6 | 1.305277000  | 3.230008000  | -0.922663000 |
| 1 | 1.537799000  | 3.949462000  | 0.266481000  |
| 6 | 0.761756000  | 4.009090000  | 1.024386000  |
| 6 | 2.306851000  | 3.236919000  | -1.911363000 |
| 1 | 2.131156000  | 2.714439000  | -2.848879000 |
| 6 | 3.509086000  | 3.913482000  | -1.712366000 |
| 6 | 2.738895000  | 4.624376000  | 0.465481000  |
| 6 | 3.730672000  | 4.605175000  | -0.520342000 |
| 1 | 2.896576000  | 5.183893000  | 1.383111000  |
| 1 | 4.266954000  | 3.909654000  | -2.490264000 |
| 1 | 4.662513000  | 5.140993000  | -0.365574000 |

93  
E + ZPE = -2859.052608

|    |              |             |              |
|----|--------------|-------------|--------------|
| 28 | 1.158916000  | 0.183264000 | -0.189907000 |
| 15 | -0.869775000 | 0.980649000 | 0.067568000  |
| 6  | -0.920477000 | 2.403009000 | 1.284840000  |
| 1  | -1.972089000 | 2.543082000 | 1.567596000  |
| 6  | -0.530797000 | 3.582007000 | 0.371867000  |
| 1  | -0.664196000 | 4.532819000 | 0.899748000  |
| 1  | 0.533948000  | 3.512385000 | 0.109387000  |
| 6  | -1.414039000 | 3.503449000 | -0.879885000 |
| 1  | -1.050619000 | 4.157726000 | -1.679251000 |
| 1  | -2.421353000 | 3.852081000 | -0.621719000 |

|   |              |              |              |
|---|--------------|--------------|--------------|
| 6 | -1.517582000 | 2.031649000  | -1.381777000 |
| 1 | -0.812150000 | 1.872983000  | -2.204138000 |
| 6 | -2.931546000 | 1.704619000  | -1.878842000 |
| 1 | -3.668334000 | 1.781004000  | -1.072698000 |
| 1 | -3.012276000 | 0.705357000  | -2.313956000 |
| 1 | -3.211722000 | 2.425406000  | -2.655947000 |
| 6 | -0.066430000 | 2.277867000  | 2.546958000  |
| 1 | 0.985282000  | 2.094613000  | 2.301219000  |
| 1 | -0.403996000 | 1.467247000  | 3.200359000  |
| 1 | -0.119569000 | 3.208756000  | 3.122607000  |
| 6 | -2.156038000 | -0.253755000 | 0.526773000  |
| 6 | -2.859950000 | -0.095590000 | 1.730579000  |
| 1 | -2.638532000 | 0.733757000  | 2.392602000  |
| 6 | -3.861003000 | -0.991838000 | 2.109114000  |
| 1 | -4.388007000 | -0.845738000 | 3.047214000  |
| 6 | -4.187555000 | -2.055016000 | 1.272775000  |
| 1 | -4.978768000 | -2.747264000 | 1.544553000  |
| 6 | -3.493008000 | -2.222988000 | 0.074520000  |
| 1 | -3.761050000 | -3.043408000 | -0.586330000 |
| 6 | -2.463295000 | -1.355647000 | -0.309572000 |
| 6 | -1.714357000 | -1.660851000 | -1.596238000 |
| 1 | -1.326018000 | -0.748449000 | -2.056309000 |
| 1 | -2.401274000 | -2.126898000 | -2.318648000 |
| 8 | -0.571096000 | -2.495398000 | -1.416992000 |
| 6 | -0.869099000 | -3.873631000 | -1.227244000 |
| 1 | -1.479403000 | -4.264352000 | -2.054668000 |
| 1 | 0.087434000  | -4.401207000 | -1.213173000 |
| 1 | -1.390773000 | -4.057541000 | -0.279413000 |
| 6 | 3.386550000  | -1.488786000 | 1.023110000  |
| 6 | 3.094886000  | -0.599487000 | -0.177366000 |
| 6 | 2.439846000  | -1.137832000 | -1.316754000 |
| 6 | 3.279490000  | 0.809111000  | -0.089559000 |
| 1 | 2.304770000  | -2.210122000 | -1.398795000 |
| 1 | 3.814716000  | 1.232467000  | 0.753426000  |
| 6 | 1.879930000  | -0.290772000 | -2.286392000 |
| 6 | 2.718176000  | 1.653542000  | -1.054432000 |
| 1 | 1.339338000  | -0.711681000 | -3.126616000 |
| 1 | 2.830269000  | 2.729417000  | -0.970758000 |
| 6 | 1.982257000  | 1.103449000  | -2.126777000 |
| 1 | 1.512507000  | 1.764957000  | -2.846956000 |
| 6 | 0.934447000  | -0.922184000 | 1.387044000  |
| 6 | 2.301288000  | -1.107735000 | 2.059864000  |
| 1 | 2.603945000  | -0.178335000 | 2.561013000  |
| 1 | 2.239698000  | -1.873216000 | 2.847317000  |
| 1 | 0.547208000  | -1.867051000 | 0.989067000  |
| 1 | 0.203869000  | -0.543440000 | 2.105119000  |
| 1 | 3.209140000  | -2.524849000 | 0.707421000  |
| 6 | 4.818289000  | -1.386832000 | 1.563882000  |
| 1 | 5.053692000  | -0.374582000 | 1.912086000  |
| 1 | 4.944752000  | -2.061904000 | 2.416204000  |
| 1 | 5.555410000  | -1.664362000 | 0.803312000  |

94  
E + ZPE = -2859.039486

|    |              |             |              |
|----|--------------|-------------|--------------|
| 28 | 0.976027000  | 0.003697000 | -0.042253000 |
| 15 | -1.049062000 | 0.879621000 | -0.008288000 |
| 6  | -1.276342000 | 2.430173000 | 1.006398000  |
| 1  | -2.359354000 | 2.602339000 | 1.077054000  |
| 6  | -0.697860000 | 3.482931000 | 0.039839000  |
| 1  | -0.885380000 | 4.493309000 | 0.419719000  |
| 1  | 0.393409000  | 3.366244000 | -0.020423000 |
| 6  | -1.352020000 | 3.267872000 | -1.332775000 |

|   |              |              |              |
|---|--------------|--------------|--------------|
| 1 | -0.799659000 | 3.776804000  | -2.129337000 |
| 1 | -2.356047000 | 3.708049000  | -1.316596000 |
| 6 | -1.489868000 | 1.744429000  | -1.644881000 |
| 1 | -0.723605000 | 1.446841000  | -2.369382000 |
| 1 | -2.873915000 | 1.412511000  | -2.218898000 |
| 1 | -3.669471000 | 1.650697000  | -1.505208000 |
| 1 | -2.983884000 | 0.362099000  | -2.499807000 |
| 1 | -3.042137000 | 2.014861000  | -3.119231000 |
| 6 | -0.668105000 | 2.477448000  | 2.408476000  |
| 1 | 0.415411000  | 2.323988000  | 2.382232000  |
| 1 | -1.101109000 | 1.728388000  | 3.079070000  |
| 1 | -0.852906000 | 3.461620000  | 2.853482000  |
| 6 | -2.360369000 | -0.336673000 | 0.393602000  |
| 6 | -3.264508000 | -0.106436000 | 1.438402000  |
| 1 | -3.216718000 | 0.812284000  | 2.013933000  |
| 6 | -4.246480000 | -1.047133000 | 1.760828000  |
| 1 | -4.937797000 | -0.846856000 | 2.573901000  |
| 6 | -4.336135000 | -2.230701000 | 1.034777000  |
| 1 | -5.099283000 | -2.965354000 | 1.273181000  |
| 6 | -3.434543000 | -2.472946000 | -0.004753000 |
| 1 | -3.507973000 | -3.397512000 | -0.572294000 |
| 6 | -2.439204000 | -1.549812000 | -0.335135000 |
| 6 | -1.473509000 | -1.873857000 | -1.460654000 |
| 1 | -1.402344000 | -1.055714000 | -2.182354000 |
| 1 | -1.821057000 | -2.760430000 | -2.006794000 |
| 8 | -0.125171000 | -2.089176000 | -1.017094000 |
| 6 | 0.063287000  | -3.371130000 | -0.416270000 |
| 1 | -0.192693000 | -4.168302000 | -1.126486000 |
| 1 | 1.120650000  | -3.449643000 | -0.158477000 |
| 1 | -0.543290000 | -3.487897000 | 0.490060000  |
| 6 | 3.419364000  | -0.726194000 | 1.516317000  |
| 6 | 3.084757000  | -0.402182000 | 0.065126000  |
| 6 | 3.168030000  | -1.393671000 | -0.949457000 |
| 6 | 2.778488000  | 0.934226000  | -0.320390000 |
| 1 | 3.483480000  | -2.395840000 | -0.670098000 |
| 1 | 2.909827000  | 1.757062000  | 0.376078000  |
| 6 | 2.832296000  | -1.116236000 | -2.266831000 |
| 6 | 2.404680000  | 1.201836000  | -1.658919000 |
| 1 | 2.879328000  | -1.893652000 | -3.021961000 |
| 1 | 2.155986000  | 2.216998000  | -1.953085000 |
| 6 | 2.404382000  | 0.179579000  | -2.610339000 |
| 1 | 2.111241000  | 0.398676000  | -3.633068000 |
| 6 | 0.903556000  | -0.561546000 | 1.764714000  |
| 6 | 2.253040000  | -0.229154000 | 2.398530000  |
| 1 | 2.343815000  | 0.854819000  | 2.552621000  |
| 1 | 2.321839000  | -0.677238000 | 3.400847000  |
| 1 | 0.756076000  | -1.647857000 | 1.679226000  |
| 1 | 0.074248000  | -0.162292000 | 2.351445000  |
| 1 | 3.455501000  | -1.821231000 | 1.598343000  |
| 6 | 4.782901000  | -0.170463000 | 1.956648000  |
| 1 | 4.809920000  | 0.923142000  | 1.885309000  |
| 1 | 4.986849000  | -0.441687000 | 2.997870000  |
| 1 | 5.594136000  | -0.568352000 | 1.338246000  |

**95**

E + ZPE = -2859.056074

|    |              |              |              |
|----|--------------|--------------|--------------|
| 28 | 0.859402000  | -0.199350000 | 0.016606000  |
| 15 | -1.241060000 | -0.775062000 | 0.029014000  |
| 6  | -1.886449000 | -1.937943000 | -1.313006000 |
| 1  | -2.837926000 | -1.496856000 | -1.630432000 |
| 6  | -2.187489000 | -3.261845000 | -0.571635000 |
| 1  | -2.910612000 | -3.856331000 | -1.141712000 |

|   |              |              |              |
|---|--------------|--------------|--------------|
| 1 | -1.272370000 | -3.863990000 | -0.501113000 |
| 6 | -2.704819000 | -2.931573000 | 0.836782000  |
| 1 | -2.748181000 | -3.824395000 | 1.470993000  |
| 1 | -3.727914000 | -2.537187000 | 0.783599000  |
| 6 | -1.766688000 | -1.875049000 | 1.464923000  |
| 1 | -0.838585000 | -2.378996000 | 1.757517000  |
| 6 | -2.326886000 | -1.152434000 | 2.692241000  |
| 1 | -3.245982000 | -0.604739000 | 2.463617000  |
| 1 | -1.604533000 | -0.442641000 | 3.111168000  |
| 1 | -2.559015000 | -1.883894000 | 3.474293000  |
| 6 | -0.999889000 | -2.085511000 | -2.552281000 |
| 1 | -0.021075000 | -2.507788000 | -2.307219000 |
| 1 | -0.842044000 | -1.125324000 | -3.055943000 |
| 1 | -1.479278000 | -2.757400000 | -3.273316000 |
| 6 | -2.403399000 | 0.665337000  | -0.004853000 |
| 6 | -3.785858000 | 0.435108000  | -0.124889000 |
| 1 | -4.164779000 | -0.579064000 | -0.193603000 |
| 6 | -4.703701000 | 1.483962000  | -0.149612000 |
| 1 | -5.764685000 | 1.270061000  | -0.236344000 |
| 6 | -4.251582000 | 2.799512000  | -0.070259000 |
| 1 | -4.954028000 | 3.626779000  | -0.101031000 |
| 6 | -2.884974000 | 3.047588000  | 0.036784000  |
| 1 | -2.529754000 | 4.073964000  | 0.087295000  |
| 6 | -1.955252000 | 2.001589000  | 0.084844000  |
| 6 | -0.501904000 | 2.373382000  | 0.271607000  |
| 1 | -0.156296000 | 2.165352000  | 1.287237000  |
| 1 | -0.359263000 | 3.443785000  | 0.085996000  |
| 8 | 0.411749000  | 1.650097000  | -0.578223000 |
| 6 | 0.251185000  | 1.927648000  | -1.981565000 |
| 1 | 0.364711000  | 3.003667000  | -2.148312000 |
| 1 | 1.043818000  | 1.391375000  | -2.501909000 |
| 1 | -0.729831000 | 1.598259000  | -2.338435000 |
| 1 | 5.417396000  | -1.169019000 | 1.001045000  |
| 6 | 4.603532000  | -1.854248000 | 0.742342000  |
| 6 | 3.713594000  | -1.270266000 | -0.371559000 |
| 1 | 4.039609000  | -2.066037000 | 1.657144000  |
| 1 | 5.048207000  | -2.796146000 | 0.404473000  |
| 1 | 4.338861000  | -1.183533000 | -1.268266000 |
| 6 | 3.229885000  | 0.140320000  | -0.033326000 |
| 6 | 3.591873000  | 1.220309000  | -0.872567000 |
| 6 | 2.657999000  | 0.452439000  | 1.227537000  |
| 1 | 4.055006000  | 1.004708000  | -1.832541000 |
| 1 | 2.557470000  | -0.321212000 | 1.980550000  |
| 6 | 3.445798000  | 2.538644000  | -0.461905000 |
| 6 | 2.554367000  | 1.795812000  | 1.652496000  |
| 1 | 3.770967000  | 3.345016000  | -1.113678000 |
| 1 | 2.204973000  | 2.006551000  | 2.659899000  |
| 6 | 2.940494000  | 2.831557000  | 0.815513000  |
| 1 | 2.885219000  | 3.861771000  | 1.155753000  |
| 6 | 1.349655000  | -2.018105000 | 0.253956000  |
| 6 | 2.523774000  | -2.191561000 | -0.711426000 |
| 1 | 2.857380000  | -3.240005000 | -0.727849000 |
| 1 | 2.191450000  | -1.974701000 | -1.736793000 |
| 1 | 0.575952000  | -2.748989000 | -0.000058000 |
| 1 | 1.634193000  | -2.234101000 | 1.292728000  |

**96**

E + ZPE = -2859.048749

|    |              |              |              |
|----|--------------|--------------|--------------|
| 28 | 0.693024000  | -0.379693000 | -0.429160000 |
| 15 | -1.325751000 | -0.768395000 | 0.067787000  |
| 6  | -2.255791000 | -1.995470000 | -1.017890000 |
| 1  | -3.247747000 | -1.553024000 | -1.165081000 |

|   |              |              |              |
|---|--------------|--------------|--------------|
| 6 | -2.413707000 | -3.242288000 | -0.119314000 |
| 1 | -3.212823000 | -3.887273000 | -0.501930000 |
| 1 | -1.490308000 | -3.836305000 | -0.138408000 |
| 6 | -2.697645000 | -2.764664000 | 1.313296000  |
| 1 | -2.662920000 | -3.590629000 | 2.032647000  |
| 1 | -3.706867000 | -2.335709000 | 1.374277000  |
| 6 | -1.647325000 | -1.690938000 | 1.675032000  |
| 1 | -0.695002000 | -2.201458000 | 1.864176000  |
| 6 | -1.979511000 | -0.818636000 | 2.886812000  |
| 1 | -2.911631000 | -0.262800000 | 2.747417000  |
| 1 | -1.183002000 | -0.094869000 | 3.094171000  |
| 1 | -2.094228000 | -1.447297000 | 3.776706000  |
| 6 | -1.650038000 | -2.256646000 | -2.398727000 |
| 1 | -0.642748000 | -2.679094000 | -2.331508000 |
| 1 | -1.595379000 | -1.338790000 | -2.994902000 |
| 1 | -2.273093000 | -2.969073000 | -2.951245000 |
| 6 | -2.349319000 | 0.769861000  | 0.041145000  |
| 6 | -3.747794000 | 0.677051000  | 0.146914000  |
| 1 | -4.221520000 | -0.292248000 | 0.264925000  |
| 6 | -4.560653000 | 1.809522000  | 0.113925000  |
| 1 | -5.637411000 | 1.703671000  | 0.205446000  |
| 6 | -3.984653000 | 3.067852000  | -0.044802000 |
| 1 | -4.606110000 | 3.957126000  | -0.086419000 |
| 6 | -2.599890000 | 3.178405000  | -0.157233000 |
| 1 | -2.151132000 | 4.160701000  | -0.282571000 |
| 6 | -1.769799000 | 2.052049000  | -0.101101000 |
| 6 | -0.276449000 | 2.292811000  | -0.123426000 |
| 1 | 0.183941000  | 2.090510000  | 0.845266000  |
| 1 | -0.064902000 | 3.335715000  | -0.380717000 |
| 8 | 0.461710000  | 1.455676000  | -1.047196000 |
| 6 | 0.208877000  | 1.742309000  | -2.437236000 |
| 1 | 0.429096000  | 2.796834000  | -2.629232000 |
| 1 | 0.886346000  | 1.115137000  | -3.017241000 |
| 1 | -0.830690000 | 1.522641000  | -2.699523000 |
| 1 | 5.340946000  | -1.765631000 | 0.964132000  |
| 6 | 4.413475000  | -2.195253000 | 0.572804000  |
| 6 | 3.743075000  | -1.224207000 | -0.412853000 |
| 1 | 3.774381000  | -2.436722000 | 1.428144000  |
| 1 | 4.662179000  | -3.135960000 | 0.069315000  |
| 1 | 4.454350000  | -1.056781000 | -1.231302000 |
| 6 | 3.440104000  | 0.144614000  | 0.186620000  |
| 6 | 3.899087000  | 1.306504000  | -0.457016000 |
| 6 | 2.743297000  | 0.296810000  | 1.401706000  |
| 1 | 4.456078000  | 1.212146000  | -1.386591000 |
| 1 | 2.443000000  | -0.576775000 | 1.970671000  |
| 6 | 3.690819000  | 2.570960000  | 0.092477000  |
| 6 | 2.548527000  | 1.565945000  | 1.963767000  |
| 1 | 4.078841000  | 3.449749000  | -0.415159000 |
| 1 | 2.054429000  | 1.654166000  | 2.927992000  |
| 6 | 3.019726000  | 2.704665000  | 1.311543000  |
| 1 | 2.887315000  | 3.685983000  | 1.758501000  |
| 6 | 1.292096000  | -2.113358000 | -0.135888000 |
| 6 | 2.472035000  | -1.817107000 | -1.065663000 |
| 1 | 2.727245000  | -2.700800000 | -1.666629000 |
| 1 | 2.142779000  | -1.078617000 | -1.841468000 |
| 1 | 0.680297000  | -2.932665000 | -0.523257000 |
| 1 | 1.582942000  | -2.364713000 | 0.887303000  |

97  
E + ZPE = -2859.055438

|    |              |              |              |
|----|--------------|--------------|--------------|
| 28 | 0.526829000  | -0.451695000 | -0.962873000 |
| 15 | -1.258441000 | -0.824610000 | 0.140199000  |

|   |              |              |              |
|---|--------------|--------------|--------------|
| 6 | -2.281011000 | -2.298185000 | -0.425270000 |
| 1 | -3.324537000 | -1.962571000 | -0.417346000 |
| 6 | -2.090208000 | -3.328676000 | 0.710628000  |
| 1 | -2.876886000 | -4.090150000 | 0.668515000  |
| 1 | -1.133171000 | -3.850758000 | 0.576636000  |
| 6 | -2.086901000 | -2.572917000 | 2.047035000  |
| 1 | -1.808452000 | -3.223887000 | 2.883501000  |
| 1 | -3.092125000 | -2.188697000 | 2.267179000  |
| 6 | -1.089422000 | -1.399681000 | 1.924100000  |
| 1 | -0.075381000 | -1.814124000 | 1.965782000  |
| 6 | -1.211822000 | -0.310537000 | 2.991119000  |
| 1 | -2.194083000 | 0.171521000  | 2.973482000  |
| 1 | -0.448322000 | 0.465440000  | 2.866682000  |
| 1 | -1.073923000 | -0.751914000 | 3.984495000  |
| 6 | -1.954423000 | -2.820416000 | -1.826763000 |
| 1 | -0.908406000 | -3.133799000 | -1.906848000 |
| 1 | -2.144398000 | -2.064387000 | -2.596797000 |
| 1 | -2.582076000 | -3.688424000 | -2.058225000 |
| 6 | -2.379125000 | 0.639371000  | 0.108166000  |
| 6 | -3.716475000 | 0.516114000  | 0.518584000  |
| 1 | -4.093004000 | -0.441255000 | 0.864700000  |
| 6 | -4.586697000 | 1.606237000  | 0.507211000  |
| 1 | -5.613409000 | 1.480783000  | 0.837488000  |
| 6 | -4.132714000 | 2.847412000  | 0.067225000  |
| 1 | -4.802215000 | 3.701772000  | 0.043207000  |
| 6 | -2.809567000 | 2.986328000  | -0.349714000 |
| 1 | -2.457335000 | 3.955323000  | -0.694479000 |
| 6 | -1.919787000 | 1.905955000  | -0.325067000 |
| 6 | -0.484461000 | 2.173226000  | -0.721776000 |
| 1 | 0.210189000  | 2.063848000  | 0.115314000  |
| 1 | -0.382710000 | 3.193515000  | -1.105657000 |
| 8 | 0.034673000  | 1.271506000  | -1.734700000 |
| 6 | -0.585082000 | 1.400793000  | -3.030878000 |
| 1 | -0.502908000 | 2.440373000  | -3.362585000 |
| 1 | -0.029162000 | 0.753334000  | -3.710055000 |
| 1 | -1.636539000 | 1.100474000  | -2.995416000 |
| 1 | 5.636308000  | -1.390672000 | 0.113595000  |
| 6 | 4.700344000  | -1.802046000 | -0.276167000 |
| 6 | 3.789634000  | -0.678113000 | -0.792285000 |
| 1 | 4.228241000  | -2.386140000 | 0.520437000  |
| 1 | 4.947391000  | -2.495298000 | -1.087539000 |
| 1 | 4.307729000  | -0.201396000 | -1.634640000 |
| 6 | 3.499418000  | 0.422737000  | 0.222597000  |
| 6 | 3.347318000  | 1.744832000  | -0.226502000 |
| 6 | 3.365562000  | 0.175436000  | 1.597477000  |
| 1 | 3.484968000  | 1.968227000  | -1.282959000 |
| 1 | 3.517408000  | -0.826442000 | 1.987687000  |
| 6 | 3.056699000  | 2.782800000  | 0.660915000  |
| 6 | 3.069987000  | 1.210061000  | 2.488945000  |
| 1 | 2.969636000  | 3.800953000  | 0.290772000  |
| 1 | 2.985665000  | 0.995909000  | 3.550868000  |
| 6 | 2.910234000  | 2.516705000  | 2.024538000  |
| 1 | 2.699074000  | 3.323375000  | 2.720733000  |
| 6 | 1.508915000  | -1.925398000 | -0.422218000 |
| 6 | 2.479219000  | -1.276476000 | -1.373253000 |
| 1 | 2.690119000  | -1.922004000 | -2.232933000 |
| 1 | 1.959978000  | -0.386862000 | -1.900160000 |
| 1 | 1.178454000  | -2.920384000 | -0.727713000 |
| 1 | 1.814110000  | -1.924511000 | 0.625449000  |

98  
E + ZPE = -3168.567304

|    |              |              |              |
|----|--------------|--------------|--------------|
| 28 | 0.224491000  | 0.064398000  | -0.693290000 |
| 15 | -0.758240000 | -1.442957000 | 0.458358000  |
| 6  | 0.085120000  | -3.130633000 | 0.575207000  |
| 1  | -0.722296000 | -3.860704000 | 0.449092000  |
| 6  | 0.581457000  | -3.208258000 | 2.035943000  |
| 1  | 0.775222000  | -4.249930000 | 2.316517000  |
| 1  | 1.534571000  | -2.672171000 | 2.134562000  |
| 6  | -0.478115000 | -2.559316000 | 2.937500000  |
| 1  | -0.113318000 | -2.425744000 | 3.962395000  |
| 1  | -1.364722000 | -3.204363000 | 3.002442000  |
| 6  | -0.866538000 | -1.196204000 | 2.323557000  |
| 1  | -0.053720000 | -0.487442000 | 2.526586000  |
| 6  | -2.176155000 | -0.600699000 | 2.844156000  |
| 1  | -3.027060000 | -1.262517000 | 2.655652000  |
| 1  | -2.395324000 | 0.369277000  | 2.385537000  |
| 1  | -2.106640000 | -0.448450000 | 3.927412000  |
| 6  | 1.152693000  | -3.431247000 | -0.478817000 |
| 1  | 2.012165000  | -2.760234000 | -0.392682000 |
| 1  | 0.755878000  | -3.352557000 | -1.497154000 |
| 1  | 1.521551000  | -4.455383000 | -0.350482000 |
| 6  | -2.451593000 | -1.822962000 | -0.182055000 |
| 6  | -3.160373000 | -2.925298000 | 0.326796000  |
| 1  | -2.722840000 | -3.540061000 | 1.106623000  |
| 6  | -4.432787000 | -3.256677000 | -0.137063000 |
| 1  | -4.955048000 | -4.110741000 | 0.283536000  |
| 6  | -5.021139000 | -2.492932000 | -1.142441000 |
| 1  | -6.005667000 | -2.746756000 | -1.523358000 |
| 6  | -4.331626000 | -1.399913000 | -1.663397000 |
| 1  | -4.789780000 | -0.805062000 | -2.449721000 |
| 6  | -3.063423000 | -1.041732000 | -1.189210000 |
| 6  | -2.450377000 | 0.222111000  | -1.751808000 |
| 1  | -2.432409000 | 1.025413000  | -1.012446000 |
| 1  | -3.033115000 | 0.569281000  | -2.611877000 |
| 8  | -1.072191000 | 0.092412000  | -2.182139000 |
| 6  | -0.891175000 | -0.782100000 | -3.314119000 |
| 1  | -1.544896000 | -0.452889000 | -4.127870000 |
| 1  | 0.150993000  | -0.690986000 | -3.621637000 |
| 1  | -1.118732000 | -1.818775000 | -3.048411000 |
| 1  | 3.229921000  | 1.716093000  | -3.241161000 |
| 6  | 4.066657000  | 1.344165000  | -2.635957000 |
| 6  | 3.646411000  | 1.157028000  | -1.168145000 |
| 1  | 4.886928000  | 2.063895000  | -2.714818000 |
| 1  | 4.408974000  | 0.402354000  | -3.079389000 |
| 1  | 3.292042000  | 2.127244000  | -0.793782000 |
| 6  | 4.807482000  | 0.733368000  | -0.277242000 |
| 6  | 5.510652000  | -0.457212000 | -0.514451000 |
| 6  | 5.201256000  | 1.533640000  | 0.802063000  |
| 1  | 5.236722000  | -1.095528000 | -1.351769000 |
| 1  | 4.675819000  | 2.466366000  | 0.996641000  |
| 6  | 6.574108000  | -0.835327000 | 0.304797000  |
| 6  | 6.266480000  | 1.159898000  | 1.624082000  |
| 1  | 7.109196000  | -1.758947000 | 0.101449000  |
| 1  | 6.558736000  | 1.799554000  | 2.452308000  |
| 6  | 6.955602000  | -0.027509000 | 1.378338000  |
| 1  | 7.786454000  | -0.319956000 | 2.013995000  |
| 6  | 1.797262000  | 0.053071000  | 0.308924000  |
| 6  | 2.472771000  | 0.150548000  | -1.044199000 |
| 1  | 1.711050000  | 0.480068000  | -1.819493000 |
| 1  | 2.796733000  | -0.833733000 | -1.396869000 |
| 1  | 2.086364000  | -0.829538000 | 0.879092000  |
| 1  | 1.926296000  | 0.940306000  | 0.938342000  |
| 6  | -0.418398000 | 2.868465000  | 0.280889000  |
| 6  | 0.148448000  | 2.687892000  | -0.932160000 |
| 1  | 0.224490000  | 2.779679000  | 1.156327000  |

|   |              |             |              |
|---|--------------|-------------|--------------|
| 1 | 1.226789000  | 2.627907000 | -1.021347000 |
| 1 | -0.405048000 | 2.808882000 | -1.858797000 |
| 6 | -1.809152000 | 3.230139000 | 0.583607000  |
| 6 | -2.723863000 | 3.645608000 | -0.404365000 |
| 1 | -2.406432000 | 3.718945000 | -1.440814000 |
| 6 | -2.238313000 | 3.214438000 | 1.923792000  |
| 1 | -1.536124000 | 2.926527000 | 2.702784000  |
| 6 | -3.540219000 | 3.575834000 | 2.266281000  |
| 6 | -4.023944000 | 4.006578000 | -0.062261000 |
| 6 | -4.438547000 | 3.969186000 | 1.272978000  |
| 1 | -4.712163000 | 4.336824000 | -0.835135000 |
| 1 | -3.849407000 | 3.561033000 | 3.307283000  |
| 1 | -5.450734000 | 4.261037000 | 1.536974000  |

**S22R**

E + ZPE = -2859.019728

|    |              |              |              |
|----|--------------|--------------|--------------|
| 28 | 0.137275000  | -0.699220000 | 0.546346000  |
| 15 | -1.548856000 | 0.800889000  | 0.076358000  |
| 6  | -1.903773000 | 1.959874000  | 1.518239000  |
| 1  | -2.994979000 | 2.003263000  | 1.609966000  |
| 6  | -1.404406000 | 3.335141000  | 1.020320000  |
| 1  | -1.847553000 | 4.138534000  | 1.619506000  |
| 1  | -0.316295000 | 3.405876000  | 1.152823000  |
| 6  | -1.761808000 | 3.462692000  | -0.466867000 |
| 1  | -1.304723000 | 4.347941000  | -0.923517000 |
| 1  | -2.848315000 | 3.571833000  | -0.584277000 |
| 6  | -1.289176000 | 2.179411000  | -1.186814000 |
| 1  | -0.198896000 | 2.239010000  | -1.303833000 |
| 6  | -1.903544000 | 1.942656000  | -2.568712000 |
| 1  | -2.993456000 | 1.858879000  | -2.520843000 |
| 1  | -1.514730000 | 1.032626000  | -3.039336000 |
| 1  | -1.660233000 | 2.782493000  | -3.228898000 |
| 6  | -1.328851000 | 1.516420000  | 2.866919000  |
| 1  | -0.238863000 | 1.424536000  | 2.832627000  |
| 1  | -1.742205000 | 0.554067000  | 3.189751000  |
| 1  | -1.576764000 | 2.252524000  | 3.639955000  |
| 6  | -3.145200000 | -0.032465000 | -0.314655000 |
| 6  | -4.365442000 | 0.657910000  | -0.243207000 |
| 1  | -4.382826000 | 1.707022000  | 0.034390000  |
| 6  | -5.575234000 | 0.027713000  | -0.536552000 |
| 1  | -6.503116000 | 0.588887000  | -0.480642000 |
| 6  | -5.585855000 | -1.317999000 | -0.897363000 |
| 1  | -6.522282000 | -1.820470000 | -1.119411000 |
| 6  | -4.383281000 | -2.020376000 | -0.968581000 |
| 1  | -4.392083000 | -3.070181000 | -1.250973000 |
| 6  | -3.162162000 | -1.395247000 | -0.692805000 |
| 6  | -1.896071000 | -2.202520000 | -0.852673000 |
| 1  | -1.249538000 | -1.807164000 | -1.641293000 |
| 1  | -2.131291000 | -3.241153000 | -1.106023000 |
| 8  | -1.050459000 | -2.226147000 | 0.326270000  |
| 6  | -1.586433000 | -2.962166000 | 1.446406000  |
| 1  | -1.905275000 | -3.950328000 | 1.101495000  |
| 1  | -0.774359000 | -3.063451000 | 2.166068000  |
| 1  | -2.430591000 | -2.429133000 | 1.893821000  |
| 6  | 2.074268000  | -0.410879000 | 0.019677000  |
| 6  | 1.518058000  | 0.693893000  | 0.689936000  |
| 1  | 1.237062000  | 1.580251000  | 0.129712000  |
| 1  | 1.006115000  | -1.631977000 | 1.215723000  |
| 1  | 1.958324000  | -0.442577000 | -1.069327000 |
| 1  | 1.841290000  | 0.891416000  | 1.711572000  |
| 6  | 3.291122000  | -1.186723000 | 0.503371000  |
| 1  | 3.316768000  | -1.129078000 | 1.598215000  |

|   |             |              |              |
|---|-------------|--------------|--------------|
| 6 | 3.284068000 | -2.666387000 | 0.091490000  |
| 1 | 3.156160000 | -2.788459000 | -0.990126000 |
| 1 | 4.228376000 | -3.142708000 | 0.370423000  |
| 1 | 2.468047000 | -3.203432000 | 0.586996000  |
| 6 | 4.512144000 | -0.428706000 | -0.025715000 |
| 6 | 4.888360000 | -0.492325000 | -1.375480000 |
| 1 | 4.325998000 | -1.109077000 | -2.072186000 |
| 6 | 5.267373000 | 0.370133000  | 0.842895000  |
| 1 | 4.993875000 | 0.427387000  | 1.894269000  |
| 6 | 6.376805000 | 1.078791000  | 0.380775000  |
| 6 | 5.994568000 | 0.219063000  | -1.841111000 |
| 6 | 6.742681000 | 1.006376000  | -0.964192000 |
| 1 | 6.275206000 | 0.152936000  | -2.888583000 |
| 1 | 6.957454000 | 1.682479000  | 1.072611000  |
| 1 | 7.607239000 | 1.555528000  | -1.325677000 |

|   |             |              |              |
|---|-------------|--------------|--------------|
| 6 | 3.347311000 | -1.624703000 | -0.089763000 |
| 1 | 3.366015000 | -1.882144000 | -1.155760000 |
| 6 | 4.033257000 | -2.776855000 | 0.683271000  |
| 1 | 4.028600000 | -2.596030000 | 1.763800000  |
| 1 | 3.529762000 | -3.730811000 | 0.494046000  |
| 1 | 5.076595000 | -2.866665000 | 0.366065000  |
| 6 | 4.080587000 | -0.303051000 | 0.090673000  |
| 6 | 4.207256000 | 0.297781000  | 1.351998000  |
| 1 | 3.789673000 | -0.186299000 | 2.232511000  |
| 6 | 4.656321000 | 0.337360000  | -1.013797000 |
| 1 | 4.581149000 | -0.121270000 | -1.997584000 |
| 6 | 5.339405000 | 1.546757000  | -0.866729000 |
| 6 | 4.885254000 | 1.508054000  | 1.502132000  |
| 6 | 5.453880000 | 2.136952000  | 0.392113000  |
| 1 | 4.979174000 | 1.954360000  | 2.488399000  |
| 1 | 5.788214000 | 2.021421000  | -1.734982000 |
| 1 | 5.989787000 | 3.074323000  | 0.510476000  |

**S22S**

E + ZPE = -2859.020849

|    |              |              |              |
|----|--------------|--------------|--------------|
| 28 | 0.467525000  | -0.389379000 | -0.424586000 |
| 15 | -1.784787000 | -0.638140000 | 0.021195000  |
| 6  | -2.686385000 | -1.676744000 | -1.266620000 |
| 1  | -3.612388000 | -1.136552000 | -1.492383000 |
| 6  | -3.054447000 | -2.972856000 | -0.509287000 |
| 1  | -3.858330000 | -3.502569000 | -1.032811000 |
| 1  | -2.189869000 | -3.650263000 | -0.491654000 |
| 6  | -3.453329000 | -2.593664000 | 0.923456000  |
| 1  | -3.579966000 | -3.476208000 | 1.560772000  |
| 1  | -4.416334000 | -2.065649000 | 0.918672000  |
| 6  | -2.357122000 | -1.666781000 | 1.495654000  |
| 1  | -1.487478000 | -2.288780000 | 1.747460000  |
| 6  | -2.756399000 | -0.875198000 | 2.743005000  |
| 1  | -3.607123000 | -0.215337000 | 2.548524000  |
| 1  | -1.930748000 | -0.260558000 | 3.119320000  |
| 1  | -3.042456000 | -1.566225000 | 3.543586000  |
| 6  | -1.932745000 | -1.893288000 | -2.582791000 |
| 1  | -0.989643000 | -2.427129000 | -2.429887000 |
| 1  | -1.711333000 | -0.945757000 | -3.087183000 |
| 1  | -2.544322000 | -2.491228000 | -3.267942000 |
| 6  | -2.669823000 | 0.978442000  | 0.086331000  |
| 6  | -4.062107000 | 1.060438000  | -0.073650000 |
| 1  | -4.649049000 | 0.160997000  | -0.230131000 |
| 6  | -4.728257000 | 2.285532000  | -0.022333000 |
| 1  | -5.807032000 | 2.317790000  | -0.141656000 |
| 6  | -4.006122000 | 3.459508000  | 0.180804000  |
| 1  | -4.513871000 | 4.418530000  | 0.214901000  |
| 6  | -2.621847000 | 3.396769000  | 0.337677000  |
| 1  | -2.058619000 | 4.312801000  | 0.497291000  |
| 6  | -1.944141000 | 2.173242000  | 0.303423000  |
| 6  | -0.453084000 | 2.175316000  | 0.541877000  |
| 1  | -0.175828000 | 1.626332000  | 1.446272000  |
| 1  | -0.080548000 | 3.198802000  | 0.650847000  |
| 8  | 0.317379000  | 1.545493000  | -0.513280000 |
| 6  | 0.371157000  | 2.280505000  | -1.754457000 |
| 1  | 0.637638000  | 3.319376000  | -1.539036000 |
| 1  | 1.151850000  | 1.814018000  | -2.354433000 |
| 1  | -0.591356000 | 2.237241000  | -2.272911000 |
| 6  | 1.892615000  | -1.573641000 | 0.350595000  |
| 6  | 0.860439000  | -2.315996000 | -0.248858000 |
| 1  | 0.109168000  | -2.805264000 | 0.363658000  |
| 1  | 1.715510000  | -0.184540000 | -1.101113000 |
| 1  | 1.771883000  | -1.316553000 | 1.408648000  |
| 1  | 1.063290000  | -2.812648000 | -1.197411000 |

**S23R**

E + ZPE = -2937.571334

|    |              |              |              |
|----|--------------|--------------|--------------|
| 28 | 0.106183000  | -1.357695000 | 0.360301000  |
| 15 | 1.037554000  | 0.715559000  | 0.220308000  |
| 6  | 0.259969000  | 1.951083000  | -0.977038000 |
| 1  | 1.102981000  | 2.486685000  | -1.429925000 |
| 6  | -0.493177000 | 2.935368000  | -0.057741000 |
| 1  | -0.741132000 | 3.851605000  | -0.605750000 |
| 1  | -1.444924000 | 2.493787000  | 0.268013000  |
| 6  | 0.404083000  | 3.217101000  | 1.154681000  |
| 1  | -0.119128000 | 3.790048000  | 1.928932000  |
| 1  | 1.270184000  | 3.819478000  | 0.849243000  |
| 6  | 0.879569000  | 1.860378000  | 1.719985000  |
| 1  | 0.034349000  | 1.424341000  | 2.269519000  |
| 6  | 2.079836000  | 1.933198000  | 2.666717000  |
| 1  | 2.966970000  | 2.339868000  | 2.172502000  |
| 1  | 2.345488000  | 0.950309000  | 3.071780000  |
| 1  | 1.843222000  | 2.584562000  | 3.515702000  |
| 6  | -0.585444000 | 1.346448000  | -2.097245000 |
| 1  | -1.429446000 | 0.775496000  | -1.700003000 |
| 1  | 0.005800000  | 0.691835000  | -2.747144000 |
| 1  | -0.997413000 | 2.144181000  | -2.725941000 |
| 6  | 2.806544000  | 0.654262000  | -0.314606000 |
| 6  | 3.501090000  | 1.860357000  | -0.518632000 |
| 1  | 3.004639000  | 2.805854000  | -0.325000000 |
| 6  | 4.821431000  | 1.883851000  | -0.962602000 |
| 1  | 5.329714000  | 2.833609000  | -1.099051000 |
| 6  | 5.475447000  | 0.684723000  | -1.238179000 |
| 1  | 6.499230000  | 0.684815000  | -1.599638000 |
| 6  | 4.800524000  | -0.520049000 | -1.057058000 |
| 1  | 5.310595000  | -1.453921000 | -1.280513000 |
| 6  | 3.481293000  | -0.559540000 | -0.584492000 |
| 6  | 2.904821000  | -1.936842000 | -0.325805000 |
| 1  | 2.901392000  | -2.171704000 | 0.739290000  |
| 1  | 3.517045000  | -2.693813000 | -0.827900000 |
| 8  | 1.538375000  | -2.144030000 | -0.745220000 |
| 6  | 1.377990000  | -2.173839000 | -2.177072000 |
| 1  | 2.061574000  | -2.918968000 | -2.596556000 |
| 1  | 0.348402000  | -2.465051000 | -2.377614000 |
| 1  | 1.584817000  | -1.190873000 | -2.610794000 |
| 6  | -3.083901000 | -1.492139000 | -0.579853000 |
| 6  | 0.047359000  | -1.607207000 | 2.982982000  |
| 6  | 1.235850000  | -2.141330000 | 2.663132000  |
| 1  | 1.346205000  | -3.199110000 | 2.439473000  |



|   |              |              |              |
|---|--------------|--------------|--------------|
| 6 | -1.037634000 | -2.860542000 | 0.208225000  |
| 6 | -2.006217000 | -1.781372000 | 0.480695000  |
| 1 | -2.449679000 | -1.859083000 | 1.476885000  |
| 1 | -1.400961000 | -0.754583000 | 0.607976000  |
| 1 | -0.044821000 | -0.574918000 | 3.307066000  |
| 1 | 2.147937000  | -1.552959000 | 2.720765000  |
| 1 | -2.589620000 | -1.512328000 | -1.561183000 |
| 1 | -0.919070000 | -3.629031000 | 0.971792000  |
| 1 | -1.066460000 | -3.287347000 | -0.796462000 |
| 1 | -0.847968000 | -2.217690000 | 3.045802000  |
| 6 | -4.126502000 | -2.630883000 | -0.555285000 |
| 1 | -4.645764000 | -2.660886000 | 0.409582000  |
| 1 | -4.880977000 | -2.474144000 | -1.331873000 |
| 1 | -3.654474000 | -3.605134000 | -0.722152000 |
| 6 | -3.765549000 | -0.136830000 | -0.431464000 |
| 6 | -4.000797000 | 0.457751000  | 0.816689000  |
| 1 | -3.680139000 | -0.036289000 | 1.730489000  |
| 6 | -4.231443000 | 0.524588000  | -1.577618000 |
| 1 | -4.068027000 | 0.075734000  | -2.555455000 |
| 6 | -4.905134000 | 1.742236000  | -1.484679000 |
| 6 | -4.670561000 | 1.680533000  | 0.914085000  |
| 6 | -5.124240000 | 2.327275000  | -0.235911000 |
| 1 | -4.846910000 | 2.120416000  | 1.891918000  |
| 1 | -5.258708000 | 2.233275000  | -2.386997000 |
| 1 | -5.649610000 | 3.274789000  | -0.159536000 |

**S23S**

E + ZPE = -2937.570602

|    |              |              |              |
|----|--------------|--------------|--------------|
| 28 | 0.180649000  | 1.521142000  | 0.113648000  |
| 15 | 0.992695000  | -0.548707000 | 0.674326000  |
| 6  | 1.636621000  | -1.013630000 | 2.389165000  |
| 1  | 2.444285000  | -1.733377000 | 2.216062000  |
| 6  | 0.455026000  | -1.781663000 | 3.014035000  |
| 1  | 0.778240000  | -2.312873000 | 3.916730000  |
| 1  | -0.330849000 | -1.077338000 | 3.323100000  |
| 6  | -0.084318000 | -2.736020000 | 1.941662000  |
| 1  | -1.014911000 | -3.223085000 | 2.253679000  |
| 1  | 0.646261000  | -3.535688000 | 1.758860000  |
| 6  | -0.312557000 | -1.925293000 | 0.646643000  |
| 1  | -1.263472000 | -1.388873000 | 0.746317000  |
| 6  | -0.377172000 | -2.765725000 | -0.630290000 |
| 1  | 0.539985000  | -3.340934000 | -0.788828000 |
| 1  | -0.547524000 | -2.146838000 | -1.517523000 |
| 1  | -1.213227000 | -3.469712000 | -0.561087000 |
| 6  | 2.202209000  | 0.116884000  | 3.247635000  |
| 1  | 1.433956000  | 0.843479000  | 3.525495000  |
| 1  | 3.015256000  | 0.647689000  | 2.739375000  |
| 1  | 2.613194000  | -0.293348000 | 4.177059000  |
| 6  | 2.340804000  | -1.040355000 | -0.496882000 |
| 6  | 3.065450000  | -2.224481000 | -0.278829000 |
| 1  | 2.824650000  | -2.861807000 | 0.565697000  |
| 6  | 4.091078000  | -2.627573000 | -1.132969000 |
| 1  | 4.623928000  | -3.553179000 | -0.936913000 |
| 6  | 4.426971000  | -1.837222000 | -2.229510000 |
| 1  | 5.230678000  | -2.131932000 | -2.897297000 |
| 6  | 3.723833000  | -0.656895000 | -2.461271000 |
| 1  | 3.986779000  | -0.038153000 | -3.315771000 |
| 6  | 2.677774000  | -0.251584000 | -1.622278000 |
| 6  | 1.933458000  | 1.004599000  | -2.015725000 |
| 1  | 0.917571000  | 0.789063000  | -2.357556000 |
| 1  | 2.458762000  | 1.506341000  | -2.835824000 |
| 8  | 1.766115000  | 1.973117000  | -0.952643000 |

|   |              |              |              |
|---|--------------|--------------|--------------|
| 6 | 3.000153000  | 2.560795000  | -0.502234000 |
| 1 | 3.551317000  | 2.934676000  | -1.371043000 |
| 1 | 2.734908000  | 3.393236000  | 0.146868000  |
| 1 | 3.611488000  | 1.831740000  | 0.039482000  |
| 6 | -2.757517000 | 1.143105000  | -1.331084000 |
| 6 | -0.380948000 | 2.753065000  | 2.512117000  |
| 6 | 0.781798000  | 3.283766000  | 2.110799000  |
| 1 | 0.812381000  | 4.204284000  | 1.534090000  |
| 6 | -0.890552000 | 2.828033000  | -0.748908000 |
| 6 | -1.903809000 | 1.870246000  | -0.274179000 |
| 1 | -2.526959000 | 2.281533000  | 0.524604000  |
| 1 | -1.344863000 | 1.006524000  | 0.345911000  |
| 1 | -0.429213000 | 1.882853000  | 3.160003000  |
| 1 | 1.735837000  | 2.869432000  | 2.422538000  |
| 1 | -0.717821000 | 2.860383000  | -1.826439000 |
| 1 | -0.897839000 | 3.821785000  | -0.303032000 |
| 1 | -1.328712000 | 3.224260000  | 2.268133000  |
| 1 | -2.083399000 | 0.842579000  | -2.145314000 |
| 6 | -3.781771000 | 2.140777000  | -1.912950000 |
| 1 | -4.372275000 | 1.664236000  | -2.700956000 |
| 1 | -4.476862000 | 2.480227000  | -1.136444000 |
| 1 | -3.282840000 | 3.019578000  | -2.335331000 |
| 6 | -3.454560000 | -0.111522000 | -0.821758000 |
| 6 | -4.055703000 | -0.170345000 | 0.444850000  |
| 1 | -4.015667000 | 0.688065000  | 1.111275000  |
| 6 | -3.563502000 | -1.230390000 | -1.659619000 |
| 1 | -3.117989000 | -1.199441000 | -2.651959000 |
| 6 | -4.245074000 | -2.376326000 | -1.247179000 |
| 6 | -4.731919000 | -1.318090000 | 0.864534000  |
| 6 | -4.828357000 | -2.425400000 | 0.020192000  |
| 1 | -5.193415000 | -1.341136000 | 1.847928000  |
| 1 | -4.322281000 | -3.228275000 | -1.917076000 |
| 1 | -5.361357000 | -3.314820000 | 0.343511000  |

**99RR**

E + ZPE = -3168.558180

|    |              |              |              |
|----|--------------|--------------|--------------|
| 28 | -0.491569000 | 0.260945000  | 0.646700000  |
| 15 | 1.587219000  | -0.476008000 | 0.870176000  |
| 6  | 2.785857000  | 0.805841000  | 1.535286000  |
| 1  | 3.171300000  | 1.391812000  | 0.696990000  |
| 6  | 3.920136000  | 0.015872000  | 2.264612000  |
| 1  | 4.885216000  | 0.181867000  | 1.775554000  |
| 1  | 4.017818000  | 0.415770000  | 3.279611000  |
| 6  | 3.595645000  | -1.493471000 | 2.323453000  |
| 1  | 3.971587000  | -1.946486000 | 3.247840000  |
| 1  | 4.081902000  | -2.022975000 | 1.495861000  |
| 6  | 2.071611000  | -1.699783000 | 2.216686000  |
| 1  | 1.597362000  | -1.297388000 | 3.121861000  |
| 6  | 1.681634000  | -3.169970000 | 2.063178000  |
| 1  | 2.096268000  | -3.602811000 | 1.146722000  |
| 1  | 0.597584000  | -3.323797000 | 2.059885000  |
| 1  | 2.085064000  | -3.742099000 | 2.906136000  |
| 6  | 2.071256000  | 1.773619000  | 2.496257000  |
| 1  | 1.616708000  | 1.244387000  | 3.341852000  |
| 1  | 1.298633000  | 2.359747000  | 1.992287000  |
| 1  | 2.803477000  | 2.476392000  | 2.909109000  |
| 6  | 2.322166000  | -1.197367000 | -0.669467000 |
| 6  | 3.590601000  | -0.778168000 | -1.101019000 |
| 1  | 4.130997000  | -0.017290000 | -0.550258000 |
| 6  | 4.194399000  | -1.328951000 | -2.233181000 |
| 1  | 5.177801000  | -0.985088000 | -2.539876000 |
| 6  | 3.538870000  | -2.325365000 | -2.950325000 |

|   |              |              |              |   |              |              |              |
|---|--------------|--------------|--------------|---|--------------|--------------|--------------|
| 1 | 4.003303000  | -2.772862000 | -3.823879000 | 1 | -3.850565000 | 3.520983000  | 0.384235000  |
| 6 | 2.278251000  | -2.751564000 | -2.532373000 | 1 | -4.384455000 | 1.859016000  | 0.596587000  |
| 1 | 1.772294000  | -3.540459000 | -3.083380000 | 6 | -2.487545000 | 2.034021000  | -0.435470000 |
| 6 | 1.644979000  | -2.197866000 | -1.412481000 | 1 | -1.659913000 | 2.753538000  | -0.474549000 |
| 6 | 0.245270000  | -2.682927000 | -1.074067000 | 6 | -3.097018000 | 1.888515000  | -1.830707000 |
| 1 | 0.071115000  | -2.682776000 | 0.002722000  | 1 | -3.887770000 | 1.131208000  | -1.849816000 |
| 1 | 0.117739000  | -3.715814000 | -1.429208000 | 1 | -2.354544000 | 1.630101000  | -2.593042000 |
| 8 | -0.794082000 | -1.860345000 | -1.608591000 | 1 | -3.548177000 | 2.840618000  | -2.132423000 |
| 6 | -1.018759000 | -2.029727000 | -3.004897000 | 6 | -0.443308000 | 1.745525000  | 2.597082000  |
| 1 | -1.234255000 | -3.081155000 | -3.243133000 | 1 | 0.005319000  | 2.484080000  | 1.924734000  |
| 1 | -1.890563000 | -1.422144000 | -3.257629000 | 1 | 0.266418000  | 0.921086000  | 2.712123000  |
| 1 | -0.161808000 | -1.696092000 | -3.603841000 | 1 | -0.562902000 | 2.219446000  | 3.578085000  |
| 6 | -3.297728000 | -0.965205000 | 1.362508000  | 6 | -3.077456000 | -0.760343000 | 0.256379000  |
| 6 | -0.985421000 | -0.508081000 | 2.370183000  | 6 | -4.022939000 | -0.887642000 | 1.285823000  |
| 6 | -2.188588000 | -0.003925000 | 1.808990000  | 1 | -3.967551000 | -0.256196000 | 2.165103000  |
| 1 | -2.547969000 | 0.936580000  | 2.232639000  | 6 | -5.064685000 | -1.814821000 | 1.210789000  |
| 1 | -1.925707000 | 0.682569000  | 0.438853000  | 1 | -5.779414000 | -1.886718000 | 2.025178000  |
| 1 | -2.809915000 | -1.828421000 | 0.892339000  | 6 | -5.185738000 | -2.629733000 | 0.090045000  |
| 1 | -0.524169000 | 0.035831000  | 3.192222000  | 1 | -5.996600000 | -3.347896000 | 0.014267000  |
| 1 | -0.859758000 | -1.588285000 | 2.420656000  | 6 | -4.256015000 | -2.511581000 | -0.943261000 |
| 6 | 0.005267000  | 1.270379000  | -1.047180000 | 1 | -4.357140000 | -3.138218000 | -1.826036000 |
| 6 | -1.405596000 | 1.220287000  | -0.907964000 | 6 | -3.195967000 | -1.599139000 | -0.882151000 |
| 1 | 0.437883000  | 0.528452000  | -1.712904000 | 6 | -2.214629000 | -1.573580000 | -2.041757000 |
| 1 | -1.950406000 | 0.489666000  | -1.498622000 | 1 | -1.904902000 | -0.554744000 | -2.280797000 |
| 1 | -1.942397000 | 2.153889000  | -0.748671000 | 1 | -2.694544000 | -1.991000000 | -2.937907000 |
| 6 | 0.775458000  | 2.531120000  | -0.942142000 | 8 | -0.994649000 | -2.275143000 | -1.783154000 |
| 6 | 0.327423000  | 3.645781000  | -0.209092000 | 6 | -1.121961000 | -3.693374000 | -1.827257000 |
| 1 | -0.613594000 | 3.601877000  | 0.334256000  | 1 | -1.514492000 | -4.021170000 | -2.800002000 |
| 6 | 1.995782000  | 2.638152000  | -1.632384000 | 1 | -0.118637000 | -4.104641000 | -1.694930000 |
| 1 | 2.350816000  | 1.793650000  | -2.217742000 | 1 | -1.776077000 | -4.072592000 | -1.031627000 |
| 6 | 2.738024000  | 3.818502000  | -1.601140000 | 6 | 2.496316000  | -1.751319000 | 1.566960000  |
| 6 | 1.070460000  | 4.823667000  | -0.174664000 | 6 | -0.046509000 | -1.639233000 | 1.287003000  |
| 6 | 2.279572000  | 4.915224000  | -0.869435000 | 6 | 1.225179000  | -1.930629000 | 0.728117000  |
| 1 | 0.703245000  | 5.674204000  | 0.392414000  | 1 | 1.249591000  | -2.781978000 | 0.045511000  |
| 1 | 3.669670000  | 3.884218000  | -2.155998000 | 1 | 1.562122000  | -0.986722000 | -0.453337000 |
| 1 | 2.854022000  | 5.836442000  | -0.845939000 | 1 | 2.361011000  | -0.850790000 | 2.180295000  |
| 6 | -4.048213000 | -1.467696000 | 2.616630000  | 1 | -0.888448000 | -2.276061000 | 1.033065000  |
| 1 | -4.830512000 | -2.175394000 | 2.326071000  | 1 | -0.077596000 | -1.225366000 | 2.293027000  |
| 1 | -3.365456000 | -1.968985000 | 3.310787000  | 6 | 0.682347000  | 1.101518000  | -1.516839000 |
| 1 | -4.528211000 | -0.640392000 | 3.150649000  | 6 | 1.580971000  | 0.007788000  | -1.641541000 |
| 6 | -4.256061000 | -0.363343000 | 0.343130000  | 1 | -0.134655000 | 1.129994000  | -2.234425000 |
| 6 | -4.977007000 | 0.808227000  | 0.619446000  | 1 | 2.635520000  | 0.184927000  | -1.439279000 |
| 1 | -4.862698000 | 1.308200000  | 1.579153000  | 1 | 1.386274000  | -0.725872000 | -2.421536000 |
| 6 | -4.455522000 | -0.993565000 | -0.892599000 | 6 | 1.129697000  | 2.433547000  | -1.042665000 |
| 1 | -3.908758000 | -1.906467000 | -1.118160000 | 6 | 0.553403000  | 3.590344000  | -1.595476000 |
| 6 | -5.347163000 | -0.467985000 | -1.830340000 | 1 | -0.209221000 | 3.491601000  | -2.364465000 |
| 6 | -5.864647000 | 1.339008000  | -0.318016000 | 6 | 2.138234000  | 2.591615000  | -0.074412000 |
| 6 | -6.052498000 | 0.702252000  | -1.546356000 | 1 | 2.614288000  | 1.718038000  | 0.363567000  |
| 1 | -6.416925000 | 2.244882000  | -0.084089000 | 6 | 2.554077000  | 3.861163000  | 0.321573000  |
| 1 | -5.494771000 | -0.976360000 | -2.779287000 | 6 | 0.972224000  | 4.861268000  | -1.201959000 |
| 1 | -6.748390000 | 1.111714000  | -2.272758000 | 6 | 1.971241000  | 5.001491000  | -0.237791000 |

**99RS**

E + ZPE = -3168.559181

|    |              |              |              |   |             |              |              |
|----|--------------|--------------|--------------|---|-------------|--------------|--------------|
| 28 | 0.254283000  | -0.307426000 | -0.134216000 | 1 | 0.522713000 | 5.740437000  | -1.654465000 |
| 15 | -1.734860000 | 0.513862000  | 0.370933000  | 1 | 3.337420000 | 3.961754000  | 1.067486000  |
| 6  | -1.817584000 | 1.274526000  | 2.092599000  | 1 | 2.299173000 | 5.989677000  | 0.070628000  |
| 1  | -2.182341000 | 0.503881000  | 2.778425000  | 6 | 2.623720000 | -2.956343000 | 2.526843000  |
| 6  | -2.824520000 | 2.465530000  | 2.002902000  | 1 | 3.507674000 | -2.839124000 | 3.160911000  |
| 1  | -3.565222000 | 2.409105000  | 2.807325000  | 1 | 1.741466000 | -3.042065000 | 3.169825000  |
| 1  | -2.266482000 | 3.395926000  | 2.157953000  | 1 | 2.733526000 | -3.894347000 | 1.971498000  |
| 6  | -3.501605000 | 2.509291000  | 0.622188000  | 6 | 3.760774000 | -1.564074000 | 0.739152000  |
|    |              |              |              | 6 | 4.137236000 | -2.493897000 | -0.242068000 |
|    |              |              |              | 1 | 3.525834000 | -3.375603000 | -0.421645000 |
|    |              |              |              | 6 | 4.592184000 | -0.458550000 | 0.962480000  |
|    |              |              |              | 1 | 4.329688000 | 0.260340000  | 1.736421000  |
|    |              |              |              | 6 | 5.761903000 | -0.276506000 | 0.220659000  |

|   |             |              |              |
|---|-------------|--------------|--------------|
| 6 | 5.303300000 | -2.313882000 | -0.987462000 |
| 6 | 6.118376000 | -1.202751000 | -0.759961000 |
| 1 | 5.579375000 | -3.046181000 | -1.740982000 |
| 1 | 6.394578000 | 0.585385000  | 0.413073000  |
| 1 | 7.027626000 | -1.065203000 | -1.337662000 |

99SR

E + ZPE = -3168.558645

|    |              |              |              |
|----|--------------|--------------|--------------|
| 28 | -0.459218000 | -0.629945000 | 0.118047000  |
| 15 | 1.587662000  | -0.323631000 | 0.915704000  |
| 6  | 1.728314000  | 1.152309000  | 2.070482000  |
| 1  | 1.976964000  | 2.033245000  | 1.473029000  |
| 6  | 2.856578000  | 0.809933000  | 3.097025000  |
| 1  | 3.652717000  | 1.560588000  | 3.063592000  |
| 1  | 2.428247000  | 0.858909000  | 4.104249000  |
| 6  | 3.424637000  | -0.601835000 | 2.844837000  |
| 1  | 3.779635000  | -1.060123000 | 3.775026000  |
| 1  | 4.286492000  | -0.555940000 | 2.168924000  |
| 6  | 2.333039000  | -1.479577000 | 2.203012000  |
| 1  | 1.526476000  | -1.625219000 | 2.934323000  |
| 6  | 2.851962000  | -2.847144000 | 1.757113000  |
| 1  | 3.631467000  | -2.753887000 | 0.993709000  |
| 1  | 2.060232000  | -3.494542000 | 1.367037000  |
| 1  | 3.295345000  | -3.364286000 | 2.615443000  |
| 6  | 0.390523000  | 1.432370000  | 2.778348000  |
| 1  | 0.045040000  | 0.563571000  | 3.350832000  |
| 1  | -0.393887000 | 1.725272000  | 2.075730000  |
| 1  | 0.524311000  | 2.256307000  | 3.488364000  |
| 6  | 2.926536000  | -0.176395000 | -0.356346000 |
| 6  | 3.859923000  | 0.869103000  | -0.271358000 |
| 1  | 3.783744000  | 1.607608000  | 0.518426000  |
| 6  | 4.912795000  | 0.982520000  | -1.181251000 |
| 1  | 5.619041000  | 1.802178000  | -1.087636000 |
| 6  | 5.059722000  | 0.034857000  | -2.189923000 |
| 1  | 5.883177000  | 0.102236000  | -2.894499000 |
| 6  | 4.143139000  | -1.012225000 | -2.282720000 |
| 1  | 4.268858000  | -1.763875000 | -3.058003000 |
| 6  | 3.066802000  | -1.132649000 | -1.394304000 |
| 6  | 2.087252000  | -2.272985000 | -1.613657000 |
| 1  | 1.667218000  | -2.626254000 | -0.670527000 |
| 1  | 2.607198000  | -3.121732000 | -2.080593000 |
| 8  | 0.955136000  | -1.908747000 | -2.405678000 |
| 6  | 1.210557000  | -1.852890000 | -3.805810000 |
| 1  | 1.600575000  | -2.813167000 | -4.172053000 |
| 1  | 0.253755000  | -1.649780000 | -4.292029000 |
| 1  | 1.919095000  | -1.055504000 | -4.064326000 |
| 6  | -3.265281000 | -1.378373000 | 1.322545000  |
| 6  | -0.793270000 | -2.031038000 | 1.434938000  |
| 6  | -1.985239000 | -1.918614000 | 0.672167000  |
| 1  | -2.148248000 | -2.703835000 | -0.069617000 |
| 1  | -1.827832000 | -0.868187000 | -0.466916000 |
| 1  | -2.964897000 | -0.592523000 | 2.028068000  |
| 1  | -0.807157000 | -1.662502000 | 2.459737000  |
| 1  | -0.150146000 | -2.894003000 | 1.277439000  |
| 6  | -0.210844000 | 0.876050000  | -1.235107000 |
| 6  | -1.364824000 | 0.116127000  | -1.555533000 |
| 1  | 0.689991000  | 0.613026000  | -1.781895000 |
| 1  | -1.266722000 | -0.632814000 | -2.337786000 |
| 1  | -2.337850000 | 0.600400000  | -1.510508000 |
| 6  | -0.273502000 | 2.284367000  | -0.782854000 |
| 6  | -1.415480000 | 2.847803000  | -0.183192000 |
| 1  | -2.302291000 | 2.241136000  | -0.017919000 |

|   |              |              |              |
|---|--------------|--------------|--------------|
| 6 | 0.845461000  | 3.110657000  | -0.989261000 |
| 1 | 1.729667000  | 2.696951000  | -1.467603000 |
| 6 | 0.824414000  | 4.454646000  | -0.617774000 |
| 6 | -1.434505000 | 4.189598000  | 0.190767000  |
| 6 | -0.315151000 | 4.998735000  | -0.023052000 |
| 1 | -2.327851000 | 4.608015000  | 0.645651000  |
| 1 | 1.694339000  | 5.078796000  | -0.801692000 |
| 1 | -0.335617000 | 6.045819000  | 0.264153000  |
| 6 | -3.918667000 | -2.517242000 | 2.138005000  |
| 1 | -4.813201000 | -2.146958000 | 2.647856000  |
| 1 | -4.223387000 | -3.344644000 | 1.487887000  |
| 1 | -3.226580000 | -2.910873000 | 2.889763000  |
| 6 | -4.249285000 | -0.765148000 | 0.335456000  |
| 6 | -4.721352000 | 0.539931000  | 0.530368000  |
| 1 | -4.385275000 | 1.105952000  | 1.397190000  |
| 6 | -4.719477000 | -1.486491000 | -0.772331000 |
| 1 | -4.390206000 | -2.510010000 | -0.937705000 |
| 6 | -5.623554000 | -0.912289000 | -1.667312000 |
| 6 | -5.629546000 | 1.116417000  | -0.361316000 |
| 6 | -6.079628000 | 0.392289000  | -1.465907000 |
| 1 | -5.988013000 | 2.127360000  | -0.188757000 |
| 1 | -5.978105000 | -1.487583000 | -2.517952000 |
| 1 | -6.786539000 | 0.836885000  | -2.160207000 |

99SS

E + ZPE = -3168.556558

|    |              |              |              |
|----|--------------|--------------|--------------|
| 28 | 0.374373000  | 0.108034000  | 0.201839000  |
| 15 | -1.831307000 | 0.074099000  | 0.360103000  |
| 6  | -2.413392000 | 0.732907000  | 2.028717000  |
| 1  | -2.547571000 | -0.123522000 | 2.695953000  |
| 6  | -3.773962000 | 1.453490000  | 1.771985000  |
| 1  | -4.529349000 | 1.124045000  | 2.492903000  |
| 1  | -3.629885000 | 2.527016000  | 1.939443000  |
| 6  | -4.244395000 | 1.229442000  | 0.325434000  |
| 1  | -4.930456000 | 2.021800000  | 0.003926000  |
| 1  | -4.790783000 | 0.282859000  | 0.232509000  |
| 6  | -3.004479000 | 1.197047000  | -0.588263000 |
| 1  | -2.521226000 | 2.181900000  | -0.558267000 |
| 6  | -3.336383000 | 0.845872000  | -2.039139000 |
| 1  | -3.755265000 | -0.162101000 | -1.926673000 |
| 1  | -2.467315000 | 0.917291000  | -2.701070000 |
| 1  | -4.087791000 | 1.547079000  | -2.419595000 |
| 6  | -1.395843000 | 1.685589000  | 2.678933000  |
| 1  | -1.166117000 | 2.535633000  | 2.028384000  |
| 1  | -0.453238000 | 1.190799000  | 2.932617000  |
| 1  | -1.817865000 | 2.083995000  | 3.608684000  |
| 6  | -2.551618000 | -1.620230000 | 0.141832000  |
| 6  | -3.467947000 | -2.127380000 | 1.076042000  |
| 1  | -3.751370000 | -1.541539000 | 1.942751000  |
| 6  | -4.051102000 | -3.386196000 | 0.917268000  |
| 1  | -4.756412000 | -3.749015000 | 1.658998000  |
| 6  | -3.735708000 | -4.158761000 | -0.195899000 |
| 1  | -4.191679000 | -5.133891000 | -0.338228000 |
| 6  | -2.832762000 | -3.663842000 | -1.136880000 |
| 1  | -2.601288000 | -4.257885000 | -2.017581000 |
| 6  | -2.221945000 | -2.412787000 | -0.987180000 |
| 6  | -1.220561000 | -1.977974000 | -2.042471000 |
| 1  | -1.260967000 | -0.900911000 | -2.208558000 |
| 1  | -1.456914000 | -2.467383000 | -2.998103000 |
| 8  | 0.139522000  | -2.245899000 | -1.693003000 |
| 6  | 0.515777000  | -3.610081000 | -1.852707000 |
| 1  | 0.330999000  | -3.948780000 | -2.882024000 |

|   |              |              |              |
|---|--------------|--------------|--------------|
| 1 | 1.586872000  | -3.669634000 | -1.648109000 |
| 1 | -0.019108000 | -4.270422000 | -1.157796000 |
| 6 | 2.818610000  | -1.810960000 | 0.992762000  |
| 6 | 0.391326000  | -1.251720000 | 1.631043000  |
| 6 | 1.735371000  | -0.829262000 | 1.461761000  |
| 1 | 2.091350000  | -0.095030000 | 2.188802000  |
| 1 | 1.879135000  | 0.107011000  | 0.228021000  |
| 1 | 2.376949000  | -2.428520000 | 0.202448000  |
| 1 | 0.103202000  | -2.227666000 | 1.246047000  |
| 1 | -0.139435000 | -0.944153000 | 2.527278000  |
| 6 | 0.438425000  | 1.526484000  | -1.239717000 |
| 6 | 1.722073000  | 0.944011000  | -1.064642000 |
| 1 | -0.135605000 | 1.160232000  | -2.087875000 |
| 1 | 2.530150000  | 1.581893000  | -0.710474000 |
| 1 | 2.039926000  | 0.170919000  | -1.760699000 |
| 6 | 0.173941000  | 2.941303000  | -0.881091000 |
| 6 | -0.676861000 | 3.708963000  | -1.694765000 |
| 1 | -1.139084000 | 3.250398000  | -2.565822000 |
| 6 | 0.778444000  | 3.567386000  | 0.224380000  |
| 1 | 1.442680000  | 3.003132000  | 0.875066000  |
| 6 | 0.546717000  | 4.914054000  | 0.497585000  |
| 6 | -0.906243000 | 5.057921000  | -1.424200000 |
| 6 | -0.297153000 | 5.664981000  | -0.325100000 |
| 1 | -1.555023000 | 5.634967000  | -2.076786000 |
| 1 | 1.027485000  | 5.379410000  | 1.353272000  |
| 1 | -0.473440000 | 6.715212000  | -0.112883000 |
| 6 | 3.178494000  | -2.739805000 | 2.174344000  |
| 1 | 3.937281000  | -3.464057000 | 1.862734000  |
| 1 | 3.587261000  | -2.171703000 | 3.017202000  |
| 1 | 2.297417000  | -3.285986000 | 2.527061000  |
| 6 | 4.055285000  | -1.127535000 | 0.423178000  |
| 6 | 4.513184000  | -1.450251000 | -0.861033000 |
| 1 | 3.974838000  | -2.189067000 | -1.451386000 |
| 6 | 4.777290000  | -0.183763000 | 1.170197000  |
| 1 | 4.462563000  | 0.071020000  | 2.180009000  |
| 6 | 5.916448000  | 0.425822000  | 0.642811000  |
| 6 | 5.655487000  | -0.846116000 | -1.390523000 |
| 6 | 6.358829000  | 0.096717000  | -0.640382000 |
| 1 | 5.995656000  | -1.115021000 | -2.386615000 |
| 1 | 6.463892000  | 1.151095000  | 1.238305000  |
| 1 | 7.248422000  | 0.567367000  | -1.048562000 |

S24

E + ZPE = -3168.564612

|    |              |              |              |
|----|--------------|--------------|--------------|
| 28 | -0.175259000 | -0.293579000 | -0.313153000 |
| 15 | -0.111378000 | 1.635111000  | 0.648132000  |
| 6  | -1.722822000 | 2.502478000  | 1.098149000  |
| 1  | -1.634849000 | 3.533628000  | 0.738813000  |
| 6  | -1.728780000 | 2.514713000  | 2.643836000  |
| 1  | -2.417365000 | 3.281388000  | 3.016276000  |
| 1  | -2.098133000 | 1.547547000  | 3.011397000  |
| 6  | -0.292175000 | 2.737201000  | 3.131991000  |
| 1  | -0.203693000 | 2.609099000  | 4.217063000  |
| 1  | 0.032623000  | 3.761959000  | 2.906988000  |
| 6  | 0.607692000  | 1.723877000  | 2.395043000  |
| 1  | 0.411423000  | 0.734802000  | 2.822481000  |
| 6  | 2.109643000  | 1.997613000  | 2.488221000  |
| 1  | 2.373107000  | 2.975180000  | 2.073765000  |
| 1  | 2.697095000  | 1.236887000  | 1.961062000  |
| 1  | 2.422376000  | 1.983597000  | 3.538369000  |
| 6  | -2.973070000 | 1.880551000  | 0.475742000  |
| 1  | -3.088529000 | 0.831429000  | 0.763891000  |

|   |              |              |              |
|---|--------------|--------------|--------------|
| 1 | -2.947604000 | 1.930495000  | -0.617937000 |
| 1 | -3.865833000 | 2.421509000  | 0.810407000  |
| 6 | 0.906246000  | 2.835878000  | -0.328186000 |
| 6 | 0.808191000  | 4.217139000  | -0.095321000 |
| 1 | 0.097928000  | 4.600792000  | 0.629149000  |
| 6 | 1.620938000  | 5.131048000  | -0.767371000 |
| 1 | 1.522552000  | 6.192545000  | -0.560682000 |
| 6 | 2.551471000  | 4.676386000  | -1.698327000 |
| 1 | 3.186668000  | 5.377519000  | -2.230961000 |
| 6 | 2.653738000  | 3.309239000  | -1.951870000 |
| 1 | 3.370088000  | 2.953779000  | -2.688449000 |
| 6 | 1.852919000  | 2.381138000  | -1.276750000 |
| 6 | 2.036202000  | 0.917654000  | -1.611146000 |
| 1 | 2.434036000  | 0.331704000  | -0.778417000 |
| 1 | 2.727531000  | 0.806315000  | -2.453054000 |
| 8 | 0.793017000  | 0.257515000  | -1.972681000 |
| 6 | 0.190537000  | 0.821405000  | -3.156845000 |
| 1 | 0.941038000  | 0.862088000  | -3.952197000 |
| 1 | -0.618669000 | 0.158909000  | -3.456856000 |
| 1 | -0.196082000 | 1.824415000  | -2.956296000 |
| 6 | 1.643305000  | -2.371049000 | 1.510858000  |
| 6 | -0.691081000 | -1.289208000 | 1.177769000  |
| 6 | 0.360858000  | -2.246812000 | 0.657425000  |
| 1 | -0.056969000 | -3.237078000 | 0.438475000  |
| 1 | 0.682668000  | -1.911628000 | -0.381767000 |
| 1 | 1.857084000  | -1.373477000 | 1.919955000  |
| 1 | -1.724860000 | -1.639433000 | 1.108209000  |
| 1 | -0.495660000 | -0.930480000 | 2.188756000  |
| 6 | -2.673952000 | -1.183478000 | -1.901537000 |
| 6 | -1.558566000 | -1.945403000 | -1.904451000 |
| 1 | -2.709547000 | -0.324227000 | -2.571944000 |
| 1 | -0.766960000 | -1.787777000 | -2.628671000 |
| 1 | -1.497433000 | -2.866821000 | -1.334952000 |
| 6 | -3.906196000 | -1.399700000 | -1.135540000 |
| 6 | -4.985775000 | -0.519567000 | -1.334478000 |
| 1 | -4.879361000 | 0.302369000  | -2.038683000 |
| 6 | -4.075021000 | -2.468215000 | -0.233038000 |
| 1 | -3.271904000 | -3.182445000 | -0.077041000 |
| 6 | -5.275055000 | -2.637665000 | 0.450766000  |
| 6 | -6.189609000 | -0.692653000 | -0.654649000 |
| 6 | -6.336432000 | -1.750774000 | 0.243482000  |
| 1 | -7.012670000 | -0.005827000 | -0.828936000 |
| 1 | -5.388871000 | -3.469451000 | 1.139885000  |
| 1 | -7.273784000 | -1.890530000 | 0.773862000  |
| 6 | 1.400554000  | -3.321543000 | 2.698360000  |
| 1 | 2.277211000  | -3.355879000 | 3.352343000  |
| 1 | 0.539444000  | -2.998491000 | 3.294713000  |
| 1 | 1.206124000  | -4.342287000 | 2.349888000  |
| 6 | 2.854018000  | -2.784838000 | 0.686496000  |
| 6 | 4.023615000  | -2.012991000 | 0.712040000  |
| 1 | 4.063370000  | -1.124258000 | 1.340021000  |
| 6 | 2.839500000  | -3.941073000 | -0.108934000 |
| 1 | 1.952156000  | -4.569524000 | -0.139531000 |
| 6 | 3.957596000  | -4.308735000 | -0.857951000 |
| 6 | 5.146945000  | -2.379586000 | -0.033296000 |
| 6 | 5.115811000  | -3.528818000 | -0.823046000 |
| 1 | 6.046115000  | -1.770889000 | 0.009843000  |
| 1 | 3.926699000  | -5.209811000 | -1.464317000 |
| 1 | 5.987772000  | -3.819502000 | -1.401801000 |

S25

E + ZPE = -3168.582943

28 0.663921000 0.719984000 -0.689606000  
15 1.265157000 -0.952636000 0.739655000  
6 2.176745000 -0.326340000 2.274026000  
1 3.048280000 -0.982358000 2.387857000  
6 1.194798000 -0.600091000 3.435145000  
1 1.730560000 -0.600747000 4.391241000  
1 0.454660000 0.209738000 3.486729000  
6 0.488522000 -1.934280000 3.168196000  
1 -0.340268000 -2.102394000 3.865526000  
1 1.188086000 -2.768879000 3.306543000  
6 -0.035804000 -1.912808000 1.714896000  
1 -0.913553000 -1.259367000 1.694354000  
6 -0.448328000 -3.275345000 1.151911000  
1 0.383235000 -3.985687000 1.138857000  
1 -0.842914000 -3.196070000 0.133289000  
1 -1.242725000 -3.699663000 1.775879000  
6 2.661296000 1.124111000 2.199774000  
1 1.830675000 1.820581000 2.039995000  
1 3.391606000 1.270955000 1.395929000  
1 3.152536000 1.401301000 3.139779000  
6 2.375908000 -2.211269000 -0.029561000  
6 2.988104000 -3.193364000 0.766997000  
1 2.837111000 -3.194005000 1.841590000  
6 3.789975000 -4.188173000 0.207862000  
1 4.244856000 -4.937784000 0.848353000  
6 4.004087000 -4.212338000 -1.168918000  
1 4.629174000 -4.979713000 -1.615150000  
6 3.424670000 -3.230494000 -1.971093000  
1 3.610577000 -3.234365000 -3.042237000  
6 2.608863000 -2.234846000 -1.422484000  
6 2.028022000 -1.193707000 -2.350013000  
1 0.940496000 -1.276941000 -2.445462000  
1 2.457518000 -1.295229000 -3.352896000  
8 2.258121000 0.161535000 -1.894095000  
6 3.654158000 0.502817000 -1.792364000  
1 4.134964000 0.356809000 -2.765165000  
1 3.708783000 1.555342000 -1.515138000  
1 4.153491000 -0.107744000 -1.034908000  
6 -3.408030000 0.198768000 0.489031000  
6 -0.955486000 1.015202000 0.268326000  
6 -2.070724000 0.138956000 -0.308941000  
1 -2.280091000 0.421107000 -1.348976000  
1 -1.759203000 -0.913109000 -0.350176000  
1 -3.167053000 -0.019409000 1.539718000  
1 -1.206633000 2.075560000 0.202514000  
1 -0.823338000 0.807311000 1.338372000  
6 0.881826000 2.701584000 -1.469734000  
6 0.026033000 1.918981000 -2.223741000  
1 1.941834000 2.646251000 -1.710869000  
1 0.404143000 1.392978000 -3.096151000  
1 -1.045214000 2.086307000 -2.203410000  
6 0.540607000 3.845992000 -0.612876000  
6 1.536917000 4.389105000 0.220074000  
1 2.531159000 3.947628000 0.220358000  
6 -0.728490000 4.455165000 -0.623875000  
1 -1.500647000 4.089065000 -1.293569000  
6 -0.993693000 5.554226000 0.188594000  
6 1.270401000 5.485749000 1.035702000  
6 0.001160000 6.068583000 1.025096000  
1 2.052342000 5.891779000 1.670579000  
1 -1.974118000 6.020347000 0.159587000  
1 -0.207901000 6.929658000 1.652950000  
6 -4.054518000 1.594819000 0.444435000  
1 -4.989565000 1.603089000 1.013356000

1 -3.394766000 2.357776000 0.871772000  
1 -4.292384000 1.891284000 -0.584306000  
6 -4.360835000 -0.888952000 0.012415000  
6 -4.713720000 -1.944732000 0.863222000  
1 -4.317685000 -1.968495000 1.876809000  
6 -4.898659000 -0.875835000 -1.283615000  
1 -4.651489000 -0.065941000 -1.966119000  
6 -5.759604000 -1.885721000 -1.713213000  
6 -5.576424000 -2.957310000 0.438820000  
6 -6.101667000 -2.931538000 -0.853141000  
1 -5.841473000 -3.761604000 1.119890000  
1 -6.168176000 -1.853565000 -2.719716000  
1 -6.775663000 -3.715585000 -1.186397000

S26

E + ZPE = -3168.559566

28 -0.140121000 0.376920000 -0.166452000  
15 1.452674000 -0.763945000 0.769987000  
6 3.090197000 0.046965000 1.187653000  
1 3.658881000 0.200120000 0.265658000  
6 3.818306000 -0.936615000 2.158769000  
1 4.655576000 -1.431355000 1.657464000  
1 4.252592000 -0.352103000 2.976188000  
6 2.830527000 -1.992410000 2.716073000  
1 3.002345000 -2.176283000 3.782472000  
1 2.973237000 -2.952737000 2.206800000  
6 1.379015000 -1.526761000 2.489702000  
1 1.183204000 -0.656998000 3.131671000  
6 0.345942000 -2.603982000 2.813051000  
1 0.485789000 -3.497938000 2.195852000  
1 -0.682315000 -2.245840000 2.693553000  
1 0.459857000 -2.913145000 3.858256000  
6 2.880446000 1.420596000 1.851333000  
1 2.278944000 1.344887000 2.763850000  
1 2.407212000 2.139232000 1.181359000  
1 3.856501000 1.826339000 2.139129000  
6 1.818772000 -2.147968000 -0.404865000  
6 3.122605000 -2.384869000 -0.865180000  
1 3.948958000 -1.780227000 -0.509642000  
6 3.394046000 -3.407480000 -1.777335000  
1 4.414542000 -3.574738000 -2.108877000  
6 2.359311000 -4.208407000 -2.251778000  
1 2.561314000 -5.007860000 -2.958148000  
6 1.054179000 -3.972778000 -1.816721000  
1 0.244646000 -4.596571000 -2.187721000  
6 0.763777000 -2.951609000 -0.906733000  
6 -0.673938000 -2.721255000 -0.497767000  
1 -0.781852000 -2.646221000 0.583525000  
1 -1.302416000 -3.552025000 -0.835505000  
8 -1.208618000 -1.483347000 -1.015202000  
6 -1.913752000 -1.644346000 -2.254417000  
1 -2.697809000 -2.400641000 -2.140243000  
1 -2.385304000 -0.689380000 -2.486359000  
1 -1.234208000 -1.934527000 -3.065250000  
6 -3.080382000 0.677929000 1.545891000  
6 -0.558741000 1.266281000 1.443777000  
6 -1.909737000 1.353998000 0.795294000  
1 -2.155082000 2.386374000 0.520403000  
1 -1.865472000 0.852658000 -0.229541000  
1 -2.715889000 -0.299068000 1.892888000  
1 -0.013841000 2.206020000 1.551911000  
1 -0.543292000 0.699463000 2.376080000

|   |              |              |              |
|---|--------------|--------------|--------------|
| 6 | 1.091459000  | 1.399287000  | -1.774056000 |
| 6 | -0.236723000 | 1.309030000  | -2.114004000 |
| 1 | 1.748131000  | 0.591455000  | -2.096987000 |
| 1 | -0.569274000 | 0.503114000  | -2.757331000 |
| 1 | -0.881282000 | 2.183429000  | -2.081070000 |
| 6 | 1.793696000  | 2.627341000  | -1.355625000 |
| 6 | 3.187516000  | 2.693326000  | -1.524619000 |
| 1 | 3.715113000  | 1.836433000  | -1.937936000 |
| 6 | 1.130558000  | 3.757654000  | -0.843019000 |
| 1 | 0.052408000  | 3.742095000  | -0.706136000 |
| 6 | 1.839919000  | 4.908447000  | -0.509901000 |
| 6 | 3.897632000  | 3.848117000  | -1.198275000 |
| 6 | 3.226373000  | 4.958807000  | -0.685604000 |
| 1 | 4.972751000  | 3.881506000  | -1.349065000 |
| 1 | 1.310655000  | 5.771458000  | -0.116253000 |
| 1 | 3.775957000  | 5.859295000  | -0.428223000 |
| 6 | -4.272026000 | 0.421770000  | 0.633462000  |
| 6 | -4.909036000 | 1.470515000  | -0.047531000 |
| 1 | -4.560269000 | 2.493133000  | 0.078414000  |
| 6 | -4.766488000 | -0.877899000 | 0.461892000  |
| 1 | -4.294755000 | -1.702599000 | 0.992572000  |
| 6 | -5.864070000 | -1.127616000 | -0.364816000 |
| 6 | -6.002949000 | 1.224957000  | -0.878257000 |
| 6 | -6.484403000 | -0.075903000 | -1.039913000 |
| 1 | -6.484766000 | 2.051671000  | -1.392951000 |
| 1 | -6.237973000 | -2.142074000 | -0.474549000 |
| 1 | -7.340396000 | -0.265904000 | -1.680991000 |
| 6 | -3.468425000 | 1.506569000  | 2.785029000  |
| 1 | -4.260746000 | 1.005079000  | 3.348914000  |
| 1 | -2.610053000 | 1.650035000  | 3.451062000  |
| 1 | -3.841021000 | 2.496477000  | 2.498303000  |

S27

E + ZPE = -3168.566278

|    |              |              |              |
|----|--------------|--------------|--------------|
| 28 | -0.488147000 | 0.255522000  | 0.560518000  |
| 15 | 1.547343000  | -0.498648000 | 0.888640000  |
| 6  | 2.708510000  | 0.795001000  | 1.598479000  |
| 1  | 3.149653000  | 1.353844000  | 0.769403000  |
| 6  | 3.789298000  | 0.016505000  | 2.416905000  |
| 1  | 4.788050000  | 0.191574000  | 2.004418000  |
| 1  | 3.802177000  | 0.419357000  | 3.435399000  |
| 6  | 3.475415000  | -1.494680000 | 2.457205000  |
| 1  | 3.802726000  | -1.944090000 | 3.401566000  |
| 1  | 4.011182000  | -2.020954000 | 1.658633000  |
| 6  | 1.961276000  | -1.711633000 | 2.267196000  |
| 1  | 1.434962000  | -1.310334000 | 3.143262000  |
| 6  | 1.591011000  | -3.184992000 | 2.095600000  |
| 1  | 2.060823000  | -3.616524000 | 1.205601000  |
| 1  | 0.510325000  | -3.346670000 | 2.031205000  |
| 1  | 1.950324000  | -3.751711000 | 2.961795000  |
| 6  | 1.949803000  | 1.798152000  | 2.485810000  |
| 1  | 1.430175000  | 1.299354000  | 3.311880000  |
| 1  | 1.222590000  | 2.384725000  | 1.918663000  |
| 1  | 2.666960000  | 2.498595000  | 2.928036000  |
| 6  | 2.366372000  | -1.237634000 | -0.600690000 |
| 6  | 3.660583000  | -0.826843000 | -0.959921000 |
| 1  | 4.170647000  | -0.061449000 | -0.386678000 |
| 6  | 4.331108000  | -1.395500000 | -2.044525000 |
| 1  | 5.332473000  | -1.058141000 | -2.295153000 |
| 6  | 3.718284000  | -2.401971000 | -2.785107000 |
| 1  | 4.234285000  | -2.863400000 | -3.621679000 |
| 6  | 2.434056000  | -2.820618000 | -2.438072000 |

|   |              |              |              |
|---|--------------|--------------|--------------|
| 1 | 1.961672000  | -3.618114000 | -3.006041000 |
| 6 | 1.734005000  | -2.248950000 | -1.367755000 |
| 6 | 0.313510000  | -2.722909000 | -1.112663000 |
| 1 | 0.063523000  | -2.690284000 | -0.051268000 |
| 1 | 0.206664000  | -3.765387000 | -1.445754000 |
| 8 | -0.677390000 | -1.911326000 | -1.745044000 |
| 6 | -0.818181000 | -2.135826000 | -3.144790000 |
| 1 | -1.039353000 | -3.192454000 | -3.352284000 |
| 1 | -1.659952000 | -1.524414000 | -3.477398000 |
| 1 | 0.079974000  | -1.841263000 | -3.702442000 |
| 6 | -3.413335000 | -0.962882000 | 1.307147000  |
| 6 | -1.020477000 | -0.525886000 | 2.190015000  |
| 6 | -2.294870000 | 0.037524000  | 1.684444000  |
| 1 | -2.662583000 | 0.861146000  | 2.305900000  |
| 1 | -2.096686000 | 0.628949000  | 0.689390000  |
| 1 | -2.924740000 | -1.804702000 | 0.798478000  |
| 1 | -0.618800000 | -0.063666000 | 3.091924000  |
| 1 | -0.973702000 | -1.614636000 | 2.236170000  |
| 6 | 0.205818000  | 1.342184000  | -1.218846000 |
| 6 | -1.161689000 | 1.183369000  | -1.178874000 |
| 1 | 0.774744000  | 0.574757000  | -1.737265000 |
| 1 | -1.627386000 | 0.337371000  | -1.673908000 |
| 1 | -1.810479000 | 2.031951000  | -0.975015000 |
| 6 | 0.920999000  | 2.618120000  | -1.006194000 |
| 6 | 0.345445000  | 3.721503000  | -0.349517000 |
| 1 | -0.659317000 | 3.652170000  | 0.059412000  |
| 6 | 2.220798000  | 2.752960000  | -1.524021000 |
| 1 | 2.673221000  | 1.915305000  | -2.049339000 |
| 6 | 2.921119000  | 3.952908000  | -1.399567000 |
| 6 | 1.046386000  | 4.917539000  | -0.220867000 |
| 6 | 2.337162000  | 5.037937000  | -0.744654000 |
| 1 | 0.584335000  | 5.759926000  | 0.285588000  |
| 1 | 3.918625000  | 4.042075000  | -1.820166000 |
| 1 | 2.879695000  | 5.973527000  | -0.646777000 |
| 6 | -4.081628000 | -1.501791000 | 2.585054000  |
| 1 | -4.844385000 | -2.243658000 | 2.330604000  |
| 1 | -3.347207000 | -1.975636000 | 3.245895000  |
| 1 | -4.571946000 | -0.699647000 | 3.147822000  |
| 6 | -4.414857000 | -0.361811000 | 0.331075000  |
| 6 | -5.209525000 | 0.739799000  | 0.683399000  |
| 1 | -5.132081000 | 1.173118000  | 1.678237000  |
| 6 | -4.556161000 | -0.902671000 | -0.954001000 |
| 1 | -3.950397000 | -1.760256000 | -1.239882000 |
| 6 | -5.467439000 | -0.362302000 | -1.864013000 |
| 6 | -6.118065000 | 1.284279000  | -0.224950000 |
| 6 | -6.250343000 | 0.734206000  | -1.501800000 |
| 1 | -6.728508000 | 2.134122000  | 0.067542000  |
| 1 | -5.569181000 | -0.801958000 | -2.852482000 |
| 1 | -6.962346000 | 1.154685000  | -2.206053000 |

S28

E + ZPE = -3168.568523

|    |              |              |              |
|----|--------------|--------------|--------------|
| 28 | 0.076633000  | -0.363922000 | -0.075776000 |
| 15 | -1.913797000 | -0.329030000 | 0.725075000  |
| 6  | -2.148072000 | -1.023574000 | 2.466510000  |
| 1  | -3.083950000 | -1.592428000 | 2.425009000  |
| 6  | -2.387040000 | 0.225957000  | 3.340980000  |
| 1  | -2.849069000 | -0.058830000 | 4.293287000  |
| 1  | -1.428644000 | 0.702876000  | 3.585105000  |
| 6  | -3.268605000 | 1.199353000  | 2.545775000  |
| 1  | -3.340818000 | 2.177002000  | 3.035820000  |
| 1  | -4.292095000 | 0.805783000  | 2.477832000  |

|   |              |              |              |
|---|--------------|--------------|--------------|
| 6 | -2.671421000 | 1.350027000  | 1.128684000  |
| 1 | -1.796859000 | 2.009261000  | 1.189215000  |
| 6 | -3.634426000 | 1.917419000  | 0.084097000  |
| 1 | -4.531816000 | 1.300432000  | -0.021381000 |
| 1 | -3.163921000 | 1.996982000  | -0.901579000 |
| 1 | -3.951914000 | 2.923330000  | 0.380765000  |
| 6 | -1.054056000 | -1.966547000 | 2.971028000  |
| 1 | -0.086529000 | -1.463426000 | 3.056391000  |
| 1 | -0.930228000 | -2.834499000 | 2.313789000  |
| 1 | -1.318124000 | -2.344461000 | 3.965410000  |
| 6 | -3.116087000 | -1.286679000 | -0.306526000 |
| 6 | -4.413711000 | -1.523889000 | 0.179133000  |
| 1 | -4.712176000 | -1.124896000 | 1.143203000  |
| 6 | -5.347679000 | -2.257666000 | -0.550954000 |
| 1 | -6.343947000 | -2.415605000 | -0.148957000 |
| 6 | -4.992163000 | -2.789338000 | -1.788523000 |
| 1 | -5.703924000 | -3.375042000 | -2.362208000 |
| 6 | -3.709229000 | -2.568204000 | -2.285412000 |
| 1 | -3.431978000 | -2.983575000 | -3.251135000 |
| 6 | -2.770000000 | -1.811759000 | -1.572935000 |
| 6 | -1.445556000 | -1.544052000 | -2.255060000 |
| 1 | -1.362839000 | -0.500709000 | -2.569096000 |
| 1 | -1.350220000 | -2.170781000 | -3.148222000 |
| 8 | -0.275131000 | -1.766974000 | -1.434693000 |
| 6 | -0.048845000 | -3.152464000 | -1.102147000 |
| 1 | -0.037247000 | -3.743207000 | -2.023378000 |
| 1 | 0.927829000  | -3.206593000 | -0.620740000 |
| 1 | -0.827546000 | -3.524424000 | -0.429521000 |
| 1 | 3.914404000  | -0.101636000 | 3.078867000  |
| 6 | 3.886112000  | 0.704789000  | 2.337277000  |
| 6 | 3.419623000  | 0.185979000  | 0.965045000  |
| 1 | 4.894132000  | 1.124393000  | 2.265446000  |
| 1 | 3.213548000  | 1.484509000  | 2.711547000  |
| 1 | 3.395228000  | 1.042488000  | 0.279084000  |
| 6 | 4.369913000  | -0.847018000 | 0.376930000  |
| 6 | 4.599802000  | -2.075582000 | 1.015974000  |
| 6 | 5.037848000  | -0.591783000 | -0.828009000 |
| 1 | 4.109895000  | -2.298196000 | 1.961437000  |
| 1 | 4.887600000  | 0.360703000  | -1.332803000 |
| 6 | 5.468353000  | -3.017873000 | 0.464864000  |
| 6 | 5.909596000  | -1.531557000 | -1.382439000 |
| 1 | 5.637965000  | -3.959884000 | 0.979284000  |
| 1 | 6.422215000  | -1.307994000 | -2.313957000 |
| 6 | 6.126079000  | -2.749240000 | -0.737663000 |
| 1 | 6.806469000  | -3.480899000 | -1.163759000 |
| 6 | 0.861411000  | 0.632965000  | 1.297815000  |
| 6 | 1.973479000  | -0.361352000 | 1.075250000  |
| 1 | 1.797115000  | -0.892631000 | 0.076887000  |
| 1 | 1.941124000  | -1.171948000 | 1.810495000  |
| 1 | 0.432738000  | 0.613161000  | 2.299649000  |
| 1 | 1.092346000  | 1.662693000  | 1.008534000  |
| 6 | 0.290619000  | 1.843128000  | -2.024257000 |
| 6 | 1.226255000  | 0.867338000  | -2.055526000 |
| 1 | -0.650021000 | 1.662247000  | -2.546434000 |
| 1 | 2.221765000  | 1.009760000  | -1.647818000 |
| 1 | 1.086300000  | -0.016760000 | -2.667549000 |
| 6 | 0.390252000  | 3.175582000  | -1.417372000 |
| 6 | -0.736482000 | 4.017660000  | -1.443841000 |
| 1 | -1.652988000 | 3.665198000  | -1.910976000 |
| 6 | 1.575406000  | 3.669042000  | -0.838066000 |
| 1 | 2.474514000  | 3.060309000  | -0.837970000 |
| 6 | 1.621141000  | 4.947629000  | -0.290410000 |
| 6 | -0.691522000 | 5.298292000  | -0.896109000 |
| 6 | 0.487459000  | 5.766031000  | -0.313750000 |

|   |              |             |              |
|---|--------------|-------------|--------------|
| 1 | -1.571855000 | 5.933426000 | -0.932632000 |
| 1 | 2.546283000  | 5.313502000 | 0.145485000  |
| 1 | 0.528810000  | 6.765731000 | 0.108533000  |

**S29**

E + ZPE = -3168.580912

|    |              |              |              |
|----|--------------|--------------|--------------|
| 28 | -0.363600000 | 0.019787000  | -1.005583000 |
| 15 | -1.861310000 | -0.632878000 | 0.571149000  |
| 6  | -1.980122000 | -2.416888000 | 1.197389000  |
| 1  | -3.053879000 | -2.609190000 | 1.284929000  |
| 6  | -1.379263000 | -2.373214000 | 2.620910000  |
| 1  | -1.731322000 | -3.231432000 | 3.204995000  |
| 1  | -0.286207000 | -2.457653000 | 2.562322000  |
| 6  | -1.764175000 | -1.038960000 | 3.272707000  |
| 1  | -1.221712000 | -0.872678000 | 4.210638000  |
| 1  | -2.833196000 | -1.031913000 | 3.523495000  |
| 6  | -1.453716000 | 0.091557000  | 2.268048000  |
| 1  | -0.366296000 | 0.231744000  | 2.234666000  |
| 6  | -2.102894000 | 1.438639000  | 2.591502000  |
| 1  | -3.195513000 | 1.376529000  | 2.595559000  |
| 1  | -1.804312000 | 2.214514000  | 1.878087000  |
| 1  | -1.782940000 | 1.770914000  | 3.585558000  |
| 6  | -1.395606000 | -3.508359000 | 0.299001000  |
| 1  | -0.309235000 | -3.432119000 | 0.220446000  |
| 1  | -1.818111000 | -3.480160000 | -0.711572000 |
| 1  | -1.627074000 | -4.492625000 | 0.721962000  |
| 6  | -3.621266000 | -0.165204000 | 0.202918000  |
| 6  | -4.660768000 | -0.647206000 | 1.018556000  |
| 1  | -4.437163000 | -1.274753000 | 1.873772000  |
| 6  | -5.996840000 | -0.331695000 | 0.773950000  |
| 1  | -6.769906000 | -0.718433000 | 1.431088000  |
| 6  | -6.329828000 | 0.470777000  | -0.314160000 |
| 1  | -7.366791000 | 0.712349000  | -0.526377000 |
| 6  | -5.315645000 | 0.962086000  | -1.132955000 |
| 1  | -5.572190000 | 1.593104000  | -1.980250000 |
| 6  | -3.968546000 | 0.672601000  | -0.882357000 |
| 6  | -2.950119000 | 1.359935000  | -1.762041000 |
| 1  | -2.428319000 | 2.150030000  | -1.214097000 |
| 1  | -3.446311000 | 1.824452000  | -2.621367000 |
| 8  | -1.896779000 | 0.512334000  | -2.265366000 |
| 6  | -2.348841000 | -0.520134000 | -3.161567000 |
| 1  | -2.924833000 | -0.067599000 | -3.975134000 |
| 1  | -1.456158000 | -0.997559000 | -3.568231000 |
| 1  | -2.965056000 | -1.255658000 | -2.634945000 |
| 1  | 3.675686000  | -3.569151000 | -2.032416000 |
| 6  | 3.368387000  | -3.818134000 | -1.010244000 |
| 6  | 2.937309000  | -2.563489000 | -0.226783000 |
| 1  | 4.214318000  | -4.310738000 | -0.520257000 |
| 1  | 2.545422000  | -4.539495000 | -1.075760000 |
| 1  | 2.604317000  | -2.892011000 | 0.767693000  |
| 6  | 4.095901000  | -1.596420000 | -0.020398000 |
| 6  | 4.775915000  | -1.031820000 | -1.112118000 |
| 6  | 4.520980000  | -1.252352000 | 1.269006000  |
| 1  | 4.484523000  | -1.293913000 | -2.126867000 |
| 1  | 4.014768000  | -1.684367000 | 2.129572000  |
| 6  | 5.843344000  | -0.153500000 | -0.919245000 |
| 6  | 5.590491000  | -0.376072000 | 1.468944000  |
| 1  | 6.363223000  | 0.260911000  | -1.779023000 |
| 1  | 5.907666000  | -0.134667000 | 2.479940000  |
| 6  | 6.255521000  | 0.178079000  | 0.374604000  |
| 1  | 7.096104000  | 0.849806000  | 0.525484000  |
| 6  | 1.090379000  | -0.777674000 | -0.059603000 |

|   |              |              |              |
|---|--------------|--------------|--------------|
| 6 | 1.722033000  | -1.879106000 | -0.919621000 |
| 1 | 0.987438000  | -2.660343000 | -1.152543000 |
| 1 | 2.061110000  | -1.496209000 | -1.888136000 |
| 1 | 0.771371000  | -1.223045000 | 0.890071000  |
| 1 | 1.821647000  | -0.007420000 | 0.196764000  |
| 6 | 0.526541000  | 1.903062000  | -1.478422000 |
| 6 | 0.935961000  | 0.904616000  | -2.346553000 |
| 1 | -0.388487000 | 2.432834000  | -1.741174000 |
| 1 | 1.945941000  | 0.516133000  | -2.297688000 |
| 1 | 0.430835000  | 0.788697000  | -3.302065000 |
| 6 | 1.308076000  | 2.588123000  | -0.441770000 |
| 6 | 0.659365000  | 3.554115000  | 0.351949000  |
| 1 | -0.393492000 | 3.767324000  | 0.178049000  |
| 6 | 2.680947000  | 2.357404000  | -0.228648000 |
| 1 | 3.221644000  | 1.644553000  | -0.842858000 |
| 6 | 3.368570000  | 3.054590000  | 0.760287000  |
| 6 | 1.348560000  | 4.253645000  | 1.338763000  |
| 6 | 2.706032000  | 4.000243000  | 1.548851000  |
| 1 | 0.832654000  | 4.999472000  | 1.936300000  |
| 1 | 4.425594000  | 2.858577000  | 0.910964000  |
| 1 | 3.248812000  | 4.546190000  | 2.315030000  |

**S30**

E + ZPE = -3168.562717

|    |              |              |              |
|----|--------------|--------------|--------------|
| 28 | -0.459481000 | -0.151773000 | -1.289458000 |
| 15 | -1.863642000 | 0.720754000  | 0.435126000  |
| 6  | -1.188838000 | 1.331424000  | 2.098187000  |
| 1  | -1.627789000 | 0.687069000  | 2.864832000  |
| 6  | -1.729486000 | 2.779532000  | 2.265936000  |
| 1  | -1.900147000 | 2.999113000  | 3.325540000  |
| 1  | -0.960179000 | 3.480597000  | 1.917211000  |
| 6  | -2.994663000 | 2.967384000  | 1.425175000  |
| 1  | -3.270679000 | 4.025196000  | 1.338062000  |
| 1  | -3.850166000 | 2.450490000  | 1.879348000  |
| 6  | -2.707267000 | 2.368146000  | 0.037267000  |
| 1  | -1.909876000 | 2.964460000  | -0.429268000 |
| 6  | -3.914816000 | 2.338223000  | -0.900588000 |
| 1  | -4.703049000 | 1.676397000  | -0.527490000 |
| 1  | -3.648865000 | 2.023243000  | -1.916148000 |
| 1  | -4.340130000 | 3.344868000  | -0.981692000 |
| 6  | 0.335197000  | 1.270584000  | 2.254308000  |
| 1  | 0.848456000  | 1.818972000  | 1.457633000  |
| 1  | 0.714322000  | 0.246182000  | 2.267263000  |
| 1  | 0.613739000  | 1.735921000  | 3.207081000  |
| 6  | -3.259047000 | -0.439639000 | 0.819325000  |
| 6  | -3.822584000 | -0.556489000 | 2.098207000  |
| 1  | -3.460323000 | 0.052320000  | 2.918623000  |
| 6  | -4.869635000 | -1.444703000 | 2.356916000  |
| 1  | -5.284569000 | -1.507288000 | 3.358519000  |
| 6  | -5.378342000 | -2.238004000 | 1.333346000  |
| 1  | -6.192345000 | -2.930652000 | 1.524044000  |
| 6  | -4.833945000 | -2.132273000 | 0.052988000  |
| 1  | -5.236184000 | -2.742239000 | -0.752275000 |
| 6  | -3.785356000 | -1.248473000 | -0.220860000 |
| 6  | -3.265245000 | -1.171271000 | -1.637973000 |
| 1  | -3.229451000 | -0.142161000 | -2.004951000 |
| 1  | -3.919700000 | -1.730152000 | -2.316137000 |
| 8  | -1.916813000 | -1.672253000 | -1.796549000 |
| 6  | -1.840853000 | -3.107436000 | -1.797132000 |
| 1  | -2.530492000 | -3.512449000 | -2.546311000 |
| 1  | -0.820259000 | -3.370614000 | -2.069417000 |
| 1  | -2.085196000 | -3.514100000 | -0.810127000 |

|   |              |              |              |
|---|--------------|--------------|--------------|
| 6 | 0.904534000  | -0.991949000 | -0.248964000 |
| 6 | 1.700385000  | -2.123427000 | -0.870103000 |
| 1 | 1.042914000  | -2.841476000 | -1.373836000 |
| 1 | 2.397608000  | -1.753795000 | -1.628831000 |
| 1 | 0.297352000  | -1.372817000 | 0.584215000  |
| 1 | 1.549638000  | -0.187942000 | 0.108741000  |
| 6 | 0.506902000  | 1.320463000  | -2.217286000 |
| 6 | 0.596878000  | 0.098301000  | -2.922203000 |
| 1 | 1.546310000  | -0.415580000 | -3.013251000 |
| 1 | -0.351787000 | 1.954732000  | -2.468340000 |
| 1 | -0.086696000 | -0.084878000 | -3.752376000 |
| 6 | 1.598414000  | 2.094166000  | -1.597278000 |
| 6 | 1.329286000  | 3.406613000  | -1.165805000 |
| 1 | 0.335959000  | 3.824335000  | -1.317385000 |
| 6 | 2.899328000  | 1.589916000  | -1.421406000 |
| 1 | 3.146189000  | 0.586837000  | -1.753967000 |
| 6 | 3.887979000  | 2.367311000  | -0.824183000 |
| 6 | 2.320798000  | 4.188712000  | -0.577256000 |
| 6 | 3.604080000  | 3.668204000  | -0.399777000 |
| 1 | 2.094586000  | 5.203815000  | -0.263858000 |
| 1 | 4.882268000  | 1.953682000  | -0.687387000 |
| 1 | 4.380050000  | 4.273684000  | 0.059143000  |
| 6 | 2.517545000  | -2.915409000 | 0.200058000  |
| 1 | 1.812642000  | -3.225688000 | 0.983602000  |
| 6 | 3.588307000  | -2.058655000 | 0.862865000  |
| 6 | 3.493820000  | -1.724016000 | 2.220021000  |
| 1 | 2.649390000  | -2.088978000 | 2.801617000  |
| 6 | 4.700862000  | -1.596241000 | 0.142987000  |
| 1 | 4.813827000  | -1.855330000 | -0.907347000 |
| 6 | 5.685486000  | -0.824627000 | 0.761559000  |
| 6 | 4.475059000  | -0.949463000 | 2.843188000  |
| 6 | 5.574927000  | -0.496341000 | 2.114892000  |
| 1 | 4.383921000  | -0.710258000 | 3.899245000  |
| 1 | 6.548016000  | -0.492357000 | 0.189530000  |
| 1 | 6.345188000  | 0.097658000  | 2.598508000  |
| 6 | 3.103706000  | -4.193951000 | -0.428544000 |
| 1 | 2.308124000  | -4.836987000 | -0.822292000 |
| 1 | 3.785799000  | -3.961952000 | -1.253938000 |
| 1 | 3.665689000  | -4.765187000 | 0.316988000  |

**S31**

E + ZPE = -3168.563626

|    |              |              |              |
|----|--------------|--------------|--------------|
| 28 | -0.401191000 | -0.151922000 | -1.311070000 |
| 15 | -1.921692000 | 0.658581000  | 0.386467000  |
| 6  | -1.273991000 | 1.250559000  | 2.064558000  |
| 1  | -1.807758000 | 0.669460000  | 2.823107000  |
| 6  | -1.703019000 | 2.737958000  | 2.164074000  |
| 1  | -1.808144000 | 3.031386000  | 3.214580000  |
| 1  | -0.907909000 | 3.363289000  | 1.737274000  |
| 6  | -2.996465000 | 2.949718000  | 1.371131000  |
| 1  | -3.235224000 | 4.014021000  | 1.257069000  |
| 1  | -3.848821000 | 2.486823000  | 1.885865000  |
| 6  | -2.799782000 | 2.287756000  | -0.005344000 |
| 1  | -2.045694000 | 2.869195000  | -0.553169000 |
| 6  | -4.063937000 | 2.190254000  | -0.860957000 |
| 1  | -4.834498000 | 1.583490000  | -0.375433000 |
| 1  | -3.864812000 | 1.761485000  | -1.850376000 |
| 1  | -4.480004000 | 3.191119000  | -1.022176000 |
| 6  | 0.229166000  | 1.051976000  | 2.284479000  |
| 1  | 0.820259000  | 1.580459000  | 1.529143000  |
| 1  | 0.516408000  | -0.003399000 | 2.269345000  |
| 1  | 0.509504000  | 1.455624000  | 3.264282000  |



|   |              |              |              |
|---|--------------|--------------|--------------|
| 6 | -3.291953000 | -0.538298000 | 0.728065000  |
| 6 | -3.996674000 | -0.554396000 | 1.940728000  |
| 1 | -3.742227000 | 0.141597000  | 2.732456000  |
| 6 | -5.045343000 | -1.449609000 | 2.163655000  |
| 1 | -5.572876000 | -1.433891000 | 3.112730000  |
| 6 | -5.411232000 | -2.352505000 | 1.169520000  |
| 1 | -6.224606000 | -3.052932000 | 1.332543000  |
| 6 | -4.721496000 | -2.351337000 | -0.043143000 |
| 1 | -5.006984000 | -3.054143000 | -0.822156000 |
| 6 | -3.670771000 | -1.459083000 | -0.280929000 |
| 6 | -2.982829000 | -1.509783000 | -1.627441000 |
| 1 | -2.982946000 | -0.535789000 | -2.128380000 |
| 1 | -3.497494000 | -2.211658000 | -2.293056000 |
| 8 | -1.590065000 | -1.895334000 | -1.557276000 |
| 6 | -1.401052000 | -3.269792000 | -1.179359000 |
| 1 | -1.924136000 | -3.918849000 | -1.890277000 |
| 1 | -0.332609000 | -3.469923000 | -1.226560000 |
| 1 | -1.774469000 | -3.451975000 | -0.166644000 |
| 6 | 1.071353000  | -1.007662000 | -0.458863000 |
| 6 | 2.014523000  | -1.940363000 | -1.191428000 |
| 1 | 1.472493000  | -2.589091000 | -1.891260000 |
| 1 | 2.736106000  | -1.377731000 | -1.793522000 |
| 1 | 0.477498000  | -1.563236000 | 0.282774000  |
| 1 | 1.609138000  | -0.198157000 | 0.039557000  |
| 6 | 0.394151000  | 1.459579000  | -2.158639000 |
| 6 | 0.579760000  | 0.291021000  | -2.936734000 |
| 1 | 1.567942000  | -0.127917000 | -3.082209000 |
| 1 | -0.511953000 | 2.036122000  | -2.372689000 |
| 1 | -0.108449000 | 0.088417000  | -3.759714000 |
| 6 | 1.433504000  | 2.287775000  | -1.513625000 |
| 6 | 1.079052000  | 3.566809000  | -1.045562000 |
| 1 | 0.061215000  | 3.924044000  | -1.187617000 |
| 6 | 2.766584000  | 1.870250000  | -1.354203000 |
| 1 | 3.081249000  | 0.898989000  | -1.721401000 |
| 6 | 3.703101000  | 2.696314000  | -0.738024000 |
| 6 | 2.017256000  | 4.397611000  | -0.436070000 |
| 6 | 3.333522000  | 3.961659000  | -0.274602000 |
| 1 | 1.723408000  | 5.386295000  | -0.095477000 |
| 1 | 4.725834000  | 2.350875000  | -0.620889000 |
| 1 | 4.068201000  | 4.605421000  | 0.199811000  |
| 6 | 2.809301000  | -2.851606000 | -0.205332000 |
| 1 | 2.070621000  | -3.403159000 | 0.393901000  |
| 6 | 3.663199000  | -2.043227000 | 0.763872000  |
| 6 | 3.372211000  | -2.036842000 | 2.134312000  |
| 1 | 2.536105000  | -2.626638000 | 2.505155000  |
| 6 | 4.762112000  | -1.293362000 | 0.317007000  |
| 1 | 5.026646000  | -1.293327000 | -0.738067000 |
| 6 | 5.541517000  | -0.560073000 | 1.212225000  |
| 6 | 4.148737000  | -1.303124000 | 3.034420000  |
| 6 | 5.236138000  | -0.560292000 | 2.575192000  |
| 1 | 3.908699000  | -1.321491000 | 4.094095000  |
| 1 | 6.396967000  | 0.002202000  | 0.846942000  |
| 1 | 5.847121000  | 0.005447000  | 3.272771000  |
| 6 | 3.635841000  | -3.887127000 | -0.990400000 |
| 1 | 2.989373000  | -4.508789000 | -1.620640000 |
| 1 | 4.373023000  | -3.405259000 | -1.641798000 |
| 1 | 4.178153000  | -4.545192000 | -0.304237000 |

S32

E + ZPE = -3168.560073

|    |              |             |              |
|----|--------------|-------------|--------------|
| 28 | -0.435702000 | 0.396574000 | -1.095755000 |
| 15 | -1.755408000 | 0.565424000 | 0.673081000  |

|   |              |              |              |
|---|--------------|--------------|--------------|
| 6 | -1.240551000 | 0.630607000  | 2.498979000  |
| 1 | -1.765513000 | -0.191534000 | 2.991628000  |
| 6 | -1.792586000 | 1.982351000  | 3.031671000  |
| 1 | -2.052143000 | 1.889098000  | 4.091761000  |
| 1 | -0.996139000 | 2.735378000  | 2.967364000  |
| 6 | -2.980891000 | 2.437736000  | 2.181362000  |
| 1 | -3.251953000 | 3.479756000  | 2.388527000  |
| 1 | -3.870865000 | 1.829288000  | 2.387454000  |
| 6 | -2.567079000 | 2.275279000  | 0.708505000  |
| 1 | -1.737638000 | 2.970297000  | 0.516470000  |
| 6 | -3.684158000 | 2.544405000  | -0.300349000 |
| 1 | -4.494609000 | 1.814122000  | -0.212567000 |
| 1 | -3.323405000 | 2.538752000  | -1.335132000 |
| 1 | -4.110771000 | 3.536931000  | -0.117488000 |
| 6 | 0.252406000  | 0.466828000  | 2.808226000  |
| 1 | 0.873665000  | 1.166473000  | 2.239119000  |
| 1 | 0.611061000  | -0.548489000 | 2.624395000  |
| 1 | 0.411332000  | 0.678627000  | 3.872075000  |
| 6 | -3.185639000 | -0.612049000 | 0.549071000  |
| 6 | -3.860296000 | -1.068322000 | 1.692367000  |
| 1 | -3.543188000 | -0.759787000 | 2.681084000  |
| 6 | -4.965534000 | -1.917113000 | 1.602922000  |
| 1 | -5.463238000 | -2.246259000 | 2.510130000  |
| 6 | -5.423538000 | -2.329610000 | 0.356280000  |
| 1 | -6.282239000 | -2.988649000 | 0.272554000  |
| 6 | -4.765174000 | -1.887829000 | -0.791232000 |
| 1 | -5.120717000 | -2.208501000 | -1.767272000 |
| 6 | -3.655973000 | -1.038100000 | -0.720913000 |
| 6 | -3.013089000 | -0.616742000 | -2.026827000 |
| 1 | -2.931601000 | 0.471429000  | -2.112299000 |
| 1 | -3.626513000 | -0.959174000 | -2.869065000 |
| 8 | -1.672941000 | -1.104020000 | -2.202903000 |
| 6 | -1.600132000 | -2.527545000 | -2.361112000 |
| 1 | -2.225761000 | -2.837847000 | -2.306552000 |
| 1 | -0.560181000 | -2.771015000 | -2.575929000 |
| 1 | -1.925402000 | -3.047769000 | -1.453873000 |
| 6 | 0.664501000  | -0.892899000 | -0.247279000 |
| 6 | 1.649345000  | -1.245504000 | -1.345746000 |
| 1 | 1.140927000  | -1.480032000 | -2.290003000 |
| 1 | 2.313387000  | -0.397572000 | -1.543825000 |
| 1 | 0.066488000  | -1.755333000 | 0.069432000  |
| 1 | 1.173377000  | -0.464577000 | 0.611832000  |
| 6 | 0.429834000  | 2.215680000  | -1.636657000 |
| 6 | 0.115310000  | 1.465362000  | -2.763807000 |
| 1 | 0.876066000  | 0.950586000  | -3.343378000 |
| 1 | -0.326901000 | 2.921639000  | -1.288907000 |
| 1 | -0.817632000 | 1.648151000  | -3.294899000 |
| 6 | 1.784272000  | 2.504274000  | -1.113864000 |
| 6 | 1.918981000  | 3.144697000  | 0.130688000  |
| 1 | 1.025414000  | 3.411411000  | 0.691535000  |
| 6 | 2.950683000  | 2.209086000  | -1.840289000 |
| 1 | 2.876158000  | 1.765102000  | -2.828577000 |
| 6 | 4.207850000  | 2.526226000  | -1.327163000 |
| 6 | 3.174307000  | 3.459271000  | 0.646023000  |
| 6 | 4.325210000  | 3.145597000  | -0.080437000 |
| 1 | 3.255200000  | 3.958869000  | 1.607082000  |
| 1 | 5.097019000  | 2.307267000  | -1.911589000 |
| 1 | 5.305146000  | 3.399676000  | 0.312652000  |
| 6 | 2.521195000  | -2.487591000 | -0.971436000 |
| 1 | 1.832512000  | -3.334460000 | -0.846455000 |
| 6 | 3.266808000  | -2.311740000 | 0.344728000  |
| 6 | 3.075395000  | -3.222430000 | 1.391765000  |
| 1 | 2.384983000  | -4.052849000 | 1.258112000  |
| 6 | 4.170492000  | -1.256013000 | 0.539560000  |

|   |             |              |              |
|---|-------------|--------------|--------------|
| 1 | 4.340622000 | -0.530319000 | -0.252287000 |
| 6 | 4.860250000 | -1.118450000 | 1.744273000  |
| 6 | 3.767158000 | -3.090742000 | 2.598011000  |
| 6 | 4.662773000 | -2.036668000 | 2.778133000  |
| 1 | 3.608655000 | -3.814842000 | 3.392621000  |
| 1 | 5.556978000 | -0.294607000 | 1.873796000  |
| 1 | 5.205549000 | -1.932683000 | 3.713390000  |
| 6 | 3.475397000 | -2.825821000 | -2.131977000 |
| 1 | 4.187899000 | -2.013145000 | -2.312073000 |
| 1 | 4.051947000 | -3.727458000 | -1.901961000 |
| 1 | 2.921158000 | -3.002580000 | -3.061558000 |

**S33**

E + ZPE = -3168.571028

|    |              |              |              |
|----|--------------|--------------|--------------|
| 28 | -0.070910000 | -0.006840000 | -0.302272000 |
| 15 | -2.047874000 | 0.739144000  | 0.202585000  |
| 6  | -2.139283000 | 1.715628000  | 1.804385000  |
| 1  | -2.371774000 | 1.015799000  | 2.612427000  |
| 6  | -3.284191000 | 2.765766000  | 1.616651000  |
| 1  | -4.036129000 | 2.667422000  | 2.406255000  |
| 1  | -2.851392000 | 3.766324000  | 1.726058000  |
| 6  | -3.931378000 | 2.637916000  | 0.221843000  |
| 1  | -4.335616000 | 3.598330000  | -0.118092000 |
| 1  | -4.770811000 | 1.933401000  | 0.245477000  |
| 6  | -2.871023000 | 2.124589000  | -0.769601000 |
| 1  | -2.090007000 | 2.892909000  | -0.861743000 |
| 6  | -3.420267000 | 1.800987000  | -2.158310000 |
| 1  | -4.163256000 | 0.997376000  | -2.118996000 |
| 1  | -2.631495000 | 1.511872000  | -2.861222000 |
| 1  | -3.915181000 | 2.685240000  | -2.574980000 |
| 6  | -0.805565000 | 2.402952000  | 2.141929000  |
| 1  | -0.484044000 | 3.081036000  | 1.344315000  |
| 1  | 0.004244000  | 1.690343000  | 2.318941000  |
| 1  | -0.927874000 | 3.001800000  | 3.051467000  |
| 6  | -3.336565000 | -0.587769000 | 0.306994000  |
| 6  | -4.233285000 | -0.607985000 | 1.387369000  |
| 1  | -4.172515000 | 0.139963000  | 2.169291000  |
| 6  | -5.233865000 | -1.576511000 | 1.489369000  |
| 1  | -5.911385000 | -1.561239000 | 2.337841000  |
| 6  | -5.360507000 | -2.546668000 | 0.500802000  |
| 1  | -6.138618000 | -3.301373000 | 0.563544000  |
| 6  | -4.476386000 | -2.540269000 | -0.578159000 |
| 1  | -4.578109000 | -3.292854000 | -1.356222000 |
| 6  | -3.459648000 | -1.585188000 | -0.693949000 |
| 6  | -2.522246000 | -1.688216000 | -1.883233000 |
| 1  | -2.318922000 | -0.707663000 | -2.318173000 |
| 1  | -2.988965000 | -2.302239000 | -2.665957000 |
| 8  | -1.238310000 | -2.226528000 | -1.556896000 |
| 6  | -1.247925000 | -3.635122000 | -1.341195000 |
| 1  | -1.639616000 | -4.161205000 | -2.222763000 |
| 1  | -0.211066000 | -3.938889000 | -1.182746000 |
| 1  | -1.845929000 | -3.912295000 | -0.463722000 |
| 6  | 2.420245000  | -1.446311000 | 1.566250000  |
| 6  | -0.120878000 | -1.059108000 | 1.280775000  |
| 6  | 1.162102000  | -1.520432000 | 0.674686000  |
| 1  | 1.050839000  | -2.505154000 | 0.214773000  |
| 1  | 1.419195000  | -0.860027000 | -0.244065000 |
| 1  | 2.423587000  | -0.454375000 | 2.038364000  |
| 1  | -0.921571000 | -1.795673000 | 1.317835000  |
| 1  | -0.019794000 | -0.524265000 | 2.226870000  |
| 6  | 0.624334000  | 1.576083000  | -1.587052000 |
| 6  | 0.539993000  | 0.369444000  | -2.248996000 |

|   |              |              |              |
|---|--------------|--------------|--------------|
| 1 | -0.226606000 | 2.246558000  | -1.673931000 |
| 1 | 1.423022000  | -0.226916000 | -2.462593000 |
| 1 | -0.322903000 | 0.146378000  | -2.867984000 |
| 6 | 1.827574000  | 2.222412000  | -1.035745000 |
| 6 | 1.716619000  | 3.548258000  | -0.575361000 |
| 1 | 0.753679000  | 4.051427000  | -0.627479000 |
| 6 | 3.089284000  | 1.600566000  | -0.988618000 |
| 1 | 3.218571000  | 0.583363000  | -1.346058000 |
| 6 | 4.196941000  | 2.286637000  | -0.498203000 |
| 6 | 2.825449000  | 4.234737000  | -0.087840000 |
| 6 | 4.070044000  | 3.603450000  | -0.046232000 |
| 1 | 2.720694000  | 5.260986000  | 0.251543000  |
| 1 | 5.161104000  | 1.789195000  | -0.471773000 |
| 1 | 4.938680000  | 4.135959000  | 0.329811000  |
| 6 | 2.316478000  | -2.504247000 | 2.684748000  |
| 1 | 3.180313000  | -2.439763000 | 3.352973000  |
| 1 | 1.408008000  | -2.365772000 | 3.281400000  |
| 1 | 2.299524000  | -3.515604000 | 2.262130000  |
| 6 | 3.730902000  | -1.595814000 | 0.802990000  |
| 6 | 3.867372000  | -2.443895000 | -0.305581000 |
| 1 | 3.016304000  | -3.012928000 | -0.671418000 |
| 6 | 4.866696000  | -0.906625000 | 1.252746000  |
| 1 | 4.783391000  | -0.247529000 | 2.114308000  |
| 6 | 6.099421000  | -1.056319000 | 0.617174000  |
| 6 | 5.097919000  | -2.588507000 | -0.951814000 |
| 6 | 6.218173000  | -1.895810000 | -0.492821000 |
| 1 | 5.180196000  | -3.250245000 | -1.809622000 |
| 1 | 6.967110000  | -0.518201000 | 0.989225000  |
| 1 | 7.176009000  | -2.012654000 | -0.991325000 |

**S34**

E + ZPE = -3168.563994

|    |              |              |              |
|----|--------------|--------------|--------------|
| 28 | 0.254483000  | 0.159345000  | -0.894839000 |
| 15 | 1.406622000  | -0.385362000 | 0.825194000  |
| 6  | 1.413214000  | 0.741693000  | 2.334529000  |
| 1  | 2.462652000  | 0.887791000  | 2.611831000  |
| 6  | 0.721857000  | -0.093997000 | 3.438148000  |
| 1  | 0.997450000  | 0.284066000  | 4.428966000  |
| 1  | -0.367051000 | 0.015860000  | 3.346903000  |
| 6  | 1.110096000  | -1.566586000 | 3.252243000  |
| 1  | 0.530571000  | -2.227269000 | 3.907463000  |
| 1  | 2.168122000  | -1.717556000 | 3.506438000  |
| 6  | 0.866595000  | -1.927743000 | 1.772744000  |
| 1  | -0.215932000 | -1.986560000 | 1.614270000  |
| 6  | 1.492021000  | -3.246547000 | 1.314705000  |
| 1  | 2.580191000  | -3.244485000 | 1.427535000  |
| 1  | 1.259116000  | -3.468393000 | 0.266580000  |
| 1  | 1.095469000  | -4.071253000 | 1.917662000  |
| 6  | 0.783333000  | 2.115620000  | 2.103165000  |
| 1  | -0.257785000 | 2.032860000  | 1.777846000  |
| 1  | 1.327202000  | 2.689758000  | 1.346605000  |
| 1  | 0.800469000  | 2.695013000  | 3.033467000  |
| 6  | 3.168344000  | -0.721462000 | 0.365464000  |
| 6  | 4.198833000  | -0.660965000 | 1.315727000  |
| 1  | 3.983554000  | -0.375355000 | 2.339406000  |
| 6  | 5.517332000  | -0.978580000 | 0.983780000  |
| 1  | 6.290907000  | -0.925371000 | 1.743992000  |
| 6  | 5.832213000  | -1.361498000 | -0.317129000 |
| 1  | 6.854459000  | -1.607460000 | -0.587713000 |
| 6  | 4.821979000  | -1.419168000 | -1.276944000 |
| 1  | 5.067438000  | -1.709974000 | -2.295466000 |
| 6  | 3.495551000  | -1.112995000 | -0.955045000 |

|   |              |              |              |   |              |              |              |
|---|--------------|--------------|--------------|---|--------------|--------------|--------------|
| 6 | 2.458714000  | -1.213289000 | -2.050862000 | 6 | 0.616863000  | -3.170779000 | 1.646010000  |
| 1 | 1.695573000  | -1.968324000 | -1.845085000 | 1 | 1.589143000  | -3.665975000 | 1.573070000  |
| 1 | 2.936151000  | -1.470795000 | -3.002144000 | 1 | 0.090979000  | -3.322750000 | 0.697055000  |
| 8 | 1.716320000  | 0.021562000  | -2.250485000 | 1 | 0.041333000  | -3.679932000 | 2.427487000  |
| 6 | 2.564856000  | 1.104259000  | -2.691158000 | 6 | 2.711282000  | 1.900616000  | 1.730847000  |
| 1 | 3.134205000  | 0.775454000  | -3.566082000 | 1 | 1.733237000  | 2.390095000  | 1.667084000  |
| 1 | 1.915537000  | 1.930400000  | -2.970490000 | 1 | 3.249927000  | 2.085336000  | 0.794219000  |
| 1 | 3.248173000  | 1.410777000  | -1.894339000 | 1 | 3.276425000  | 2.387769000  | 2.533908000  |
| 6 | -2.085075000 | -2.168055000 | -1.365356000 | 6 | 2.867115000  | -1.646807000 | -0.116089000 |
| 6 | -1.408275000 | -0.010517000 | -0.081568000 | 6 | 3.802447000  | -2.373605000 | 0.639468000  |
| 6 | -1.809140000 | -0.648022000 | -1.398754000 | 1 | 3.811277000  | -2.289362000 | 1.721505000  |
| 1 | -2.646333000 | -0.118048000 | -1.868687000 | 6 | 4.729385000  | -3.219881000 | 0.031264000  |
| 1 | -0.984338000 | -0.482536000 | -2.162513000 | 1 | 5.436225000  | -3.773530000 | 0.641931000  |
| 1 | -1.198796000 | -2.648240000 | -0.925693000 | 6 | 4.743592000  | -3.347919000 | -1.356345000 |
| 1 | -1.870489000 | 0.960323000  | 0.120569000  | 1 | 5.462427000  | -4.001201000 | -1.841343000 |
| 1 | -1.564773000 | -0.664097000 | 0.776228000  | 6 | 3.838730000  | -2.614876000 | -2.122688000 |
| 6 | -0.298113000 | 3.245914000  | -1.598718000 | 1 | 3.864526000  | -2.696088000 | -3.206543000 |
| 6 | -0.766278000 | 2.266532000  | -2.400486000 | 6 | 2.897745000  | -1.770961000 | -1.522559000 |
| 1 | 0.737573000  | 3.562949000  | -1.726743000 | 6 | 1.958717000  | -0.992468000 | -2.413349000 |
| 1 | -0.174639000 | 1.877789000  | -3.222755000 | 1 | 0.919361000  | -1.323838000 | -2.318613000 |
| 1 | -1.807943000 | 1.964352000  | -2.386080000 | 1 | 2.246578000  | -1.106049000 | -3.464557000 |
| 6 | -1.034033000 | 3.997132000  | -0.575808000 | 8 | 1.931505000  | 0.419588000  | -2.097668000 |
| 6 | -0.357225000 | 5.002730000  | 0.138170000  | 6 | 3.189408000  | 1.081992000  | -2.329342000 |
| 1 | 0.690434000  | 5.197088000  | -0.080437000 | 1 | 3.448852000  | 1.005708000  | -3.390489000 |
| 6 | -2.396002000 | 3.778029000  | -0.290717000 | 1 | 3.056393000  | 2.130082000  | -2.061958000 |
| 1 | -2.95554000  | 3.029779000  | -0.844341000 | 1 | 3.983915000  | 0.641749000  | -1.719906000 |
| 6 | -3.047554000 | 4.528875000  | 0.682913000  | 6 | -3.388991000 | 0.522705000  | 0.743994000  |
| 6 | -1.010638000 | 5.757989000  | 1.109989000  | 6 | -1.111959000 | 0.686748000  | 0.431215000  |
| 6 | -2.357564000 | 5.520428000  | 1.387810000  | 6 | -2.002936000 | -0.491521000 | 0.028644000  |
| 1 | -0.471171000 | 6.533823000  | 1.645407000  | 1 | -1.499412000 | -1.451253000 | 0.208176000  |
| 1 | -4.099091000 | 4.349099000  | 0.887049000  | 1 | -2.203351000 | -0.462199000 | -1.049812000 |
| 1 | -2.871174000 | 6.109043000  | 2.142304000  | 1 | -3.858895000 | 0.454197000  | 0.564079000  |
| 6 | -2.267145000 | -2.729037000 | -2.787514000 | 1 | -1.651910000 | 1.631349000  | 0.320102000  |
| 1 | -3.132049000 | -2.275788000 | -3.284953000 | 1 | -0.823685000 | 0.630858000  | 1.486646000  |
| 1 | -1.383131000 | -2.534684000 | -3.408638000 | 6 | 0.064818000  | 2.639400000  | -1.576203000 |
| 1 | -2.431674000 | -3.810374000 | -2.759747000 | 6 | -0.654140000 | 1.631812000  | -2.194587000 |
| 6 | -3.269727000 | -2.504857000 | -0.468431000 | 1 | 1.077459000  | 2.816312000  | -1.935797000 |
| 6 | -3.115168000 | -3.390971000 | 0.605150000  | 1 | -0.255590000 | 1.151589000  | -3.083822000 |
| 1 | -2.140801000 | -3.838486000 | 0.792992000  | 1 | -1.726409000 | 1.545460000  | -2.055039000 |
| 6 | -4.541061000 | -1.959963000 | -0.702184000 | 6 | -0.448502000 | 3.731506000  | -0.736629000 |
| 1 | -4.696570000 | -1.277289000 | -1.534599000 | 6 | 0.471797000  | 4.562930000  | -0.070691000 |
| 6 | -5.621520000 | -2.288151000 | 0.116146000  | 1 | 1.537427000  | 4.375945000  | -0.183021000 |
| 6 | -4.194635000 | -3.724405000 | 1.426296000  | 6 | -1.821311000 | 4.015284000  | -0.608234000 |
| 6 | -5.451754000 | -3.171378000 | 1.184845000  | 1 | -2.551087000 | 3.422907000  | -1.151611000 |
| 1 | -4.052506000 | -4.417990000 | 2.250585000  | 6 | -2.254533000 | 5.078535000  | 0.178990000  |
| 1 | -6.598727000 | -1.857061000 | -0.083238000 | 6 | 0.038425000  | 5.624732000  | 0.719020000  |
| 1 | -6.294314000 | -3.428659000 | 1.820201000  | 6 | -1.328061000 | 5.881953000  | 0.849961000  |

S35

E + ZPE = -3168.582265

|    |              |              |              |   |              |              |              |
|----|--------------|--------------|--------------|---|--------------|--------------|--------------|
| 28 | 0.418365000  | 0.722901000  | -0.701693000 | 1 | 0.763713000  | 6.256582000  | 1.223105000  |
| 15 | 1.614666000  | -0.587242000 | 0.732052000  | 1 | -3.316523000 | 5.291023000  | 0.258784000  |
| 6  | 2.574105000  | 0.404859000  | 2.023563000  | 1 | -1.669753000 | 6.714300000  | 1.458081000  |
| 1  | 3.575500000  | -0.041424000 | 2.051440000  | 6 | -4.284662000 | -1.577179000 | 0.108184000  |
| 6  | 1.854355000  | 0.086453000  | 3.352306000  | 6 | -4.012123000 | -2.947372000 | 0.239510000  |
| 1  | 2.501748000  | 0.332967000  | 4.201624000  | 1 | -3.155410000 | -3.277116000 | 0.823106000  |
| 1  | 0.958079000  | 0.714862000  | 3.443286000  | 6 | -5.402827000 | -1.195260000 | -0.644446000 |
| 6  | 1.456394000  | -1.394062000 | 3.340607000  | 1 | -5.636667000 | -0.138134000 | -0.754016000 |
| 1  | 0.795854000  | -1.644926000 | 4.178516000  | 6 | -6.227138000 | -2.147498000 | -1.246867000 |
| 1  | 2.347720000  | -2.026831000 | 3.443821000  | 6 | -4.831921000 | -3.902997000 | -0.360872000 |
| 6  | 0.748069000  | -1.686494000 | 1.998601000  | 6 | -5.943410000 | -3.506153000 | -1.107326000 |
| 1  | -0.259859000 | -1.265261000 | 2.062195000  | 1 | -4.605583000 | -4.959327000 | -0.242084000 |
|    |              |              |              | 1 | -7.092369000 | -1.826652000 | -1.820639000 |
|    |              |              |              | 1 | -6.584148000 | -4.250244000 | -1.571906000 |
|    |              |              |              | 6 | -3.270868000 | -0.703564000 | 2.267275000  |
|    |              |              |              | 1 | -2.702892000 | 0.113130000  | 2.726673000  |
|    |              |              |              | 1 | -4.263149000 | -0.719065000 | 2.729119000  |

1 -2.776837000 -1.648675000 2.524722000

S36

E + ZPE = -3168.560257

28 -0.259387000 -0.127032000 0.088426000
15 1.798123000 -0.301356000 0.794130000
6 2.825200000 1.237164000 1.090096000
1 3.153312000 1.634555000 0.125917000
6 4.035442000 0.785613000 1.969505000
1 4.965094000 0.807519000 1.392704000
1 4.160025000 1.511281000 2.779829000
6 3.799008000 -0.630686000 2.549881000
1 4.150833000 -0.701830000 3.585116000
1 4.361270000 -1.377258000 1.976801000
6 2.299664000 -0.979224000 2.478691000
1 1.756986000 -0.326289000 3.175984000
6 1.999032000 -2.430340000 2.847850000
1 2.510233000 -3.133055000 2.181108000
1 0.925840000 -2.649909000 2.839366000
1 2.360608000 -2.628033000 3.863224000
6 2.004994000 2.333255000 1.793284000
1 1.615139000 1.996283000 2.760281000
1 1.169810000 2.681109000 1.183343000
1 2.656053000 3.192491000 1.987643000
6 2.699456000 -1.315461000 -0.465364000
6 3.893084000 -0.858637000 -1.044087000
1 4.328104000 0.084572000 -0.734201000
6 4.559807000 -1.607975000 -2.016307000
1 5.487146000 -1.234303000 -2.440302000
6 4.037922000 -2.829860000 -2.431082000
1 4.551064000 -3.421058000 -3.183458000
6 2.844674000 -3.291036000 -1.872897000
1 2.436396000 -4.246427000 -2.193372000
6 2.161873000 -2.552308000 -0.901443000
6 0.856935000 -3.089361000 -0.356124000
1 0.818751000 -3.035981000 0.730873000
1 0.732038000 -4.140559000 -0.639739000
8 -0.290202000 -2.339410000 -0.804611000
6 -0.827311000 -2.819295000 -2.044153000
1 -1.000622000 -3.900033000 -1.983687000
1 -1.786578000 -2.323123000 -2.196160000
1 -0.156679000 -2.604113000 -2.885222000
6 -3.409348000 0.518332000 1.312735000
6 -0.864438000 0.414025000 1.788098000
6 -2.097527000 -0.305782000 1.330721000
1 -2.227940000 -1.251343000 1.866132000
1 -1.956618000 -0.640653000 0.246956000
1 -3.172287000 1.484581000 0.846039000
1 -0.940672000 1.503644000 1.852700000
1 -0.400425000 0.005023000 2.684532000
6 0.120316000 1.197323000 -1.697938000
6 -1.116664000 0.598940000 -1.742503000
1 0.946550000 0.676590000 -2.181920000
1 -1.258434000 -0.298419000 -2.331981000
1 -2.020407000 1.162144000 -1.528036000
6 0.386026000 2.619583000 -1.406279000
6 1.623469000 3.164218000 -1.790348000
1 2.359037000 2.524644000 -2.273612000
6 -0.561968000 3.473751000 -0.813066000
1 -1.532037000 3.086740000 -0.513566000
6 -0.276367000 4.820678000 -0.607400000
6 1.908848000 4.514419000 -1.588625000

6 0.960850000 5.346816000 -0.992372000
1 2.867102000 4.916948000 -1.904165000
1 -1.021911000 5.464839000 -0.150127000
1 1.178783000 6.398850000 -0.834545000
6 -4.490699000 -0.144268000 0.471281000
6 -4.952060000 -1.437602000 0.761594000
1 -4.543721000 -1.984522000 1.608494000
6 -5.057558000 0.534678000 -0.615446000
1 -4.727612000 1.545914000 -0.846727000
6 -6.054163000 -0.057207000 -1.394409000
6 -5.945543000 -2.033424000 -0.015553000
6 -6.499761000 -1.345125000 -1.097216000
1 -6.292826000 -3.033641000 0.228536000
1 -6.483990000 0.490886000 -2.228241000
1 -7.277253000 -1.807450000 -1.698506000
6 -3.876747000 0.796068000 2.753177000
1 -3.102068000 1.318107000 3.326381000
1 -4.778410000 1.415887000 2.750567000
1 -4.115755000 -0.135719000 3.278254000

S37

E + ZPE = -3168.568859

28 0.077646000 -0.062260000 0.178917000
15 2.125786000 0.437247000 0.675575000
6 2.426274000 2.279507000 0.862429000
1 2.515157000 2.741761000 -0.125761000
6 3.747311000 2.428679000 1.676985000
1 4.554588000 2.805968000 1.042163000
1 3.590293000 3.182402000 2.455765000
6 4.151965000 1.075387000 2.309311000
1 4.544149000 1.208560000 3.323535000
1 4.953442000 0.609393000 1.723874000
6 2.946228000 0.111872000 2.336762000
1 2.202345000 0.479986000 3.056235000
6 3.357858000 -1.303696000 2.741856000
1 4.063073000 -1.740315000 2.026850000
1 2.505572000 -1.980170000 2.854810000
1 3.864467000 -1.262849000 3.712762000
6 1.240454000 2.934003000 1.597763000
1 1.095403000 2.504253000 2.590730000
1 0.299585000 2.836032000 1.050259000
1 1.443299000 4.002461000 1.731472000
6 3.276184000 -0.211325000 -0.618251000
6 4.116436000 0.674520000 -1.310851000
1 4.109359000 1.733106000 -1.077339000
6 4.989374000 0.223750000 -2.303102000
1 5.630583000 0.932459000 -2.818583000
6 5.038566000 -1.131122000 -2.615597000
1 5.719665000 -1.496584000 -3.378198000
6 4.205417000 -2.021954000 -1.937371000
1 4.252462000 -3.081863000 -2.174881000
6 3.311099000 -1.591942000 -0.950126000
6 2.409703000 -2.632048000 -0.301216000
1 2.273917000 -2.433838000 0.760906000
1 2.874387000 -3.623892000 -0.394718000
8 1.084851000 -2.672237000 -0.833779000
6 0.981965000 -3.327212000 -2.093432000
1 1.358387000 -4.357877000 -2.029312000
1 -0.079153000 -3.351345000 -2.350112000
1 1.531555000 -2.795972000 -2.881875000
6 -2.867480000 -0.938326000 1.767748000
6 -0.283118000 -0.781442000 1.884238000

|   |              |              |              |
|---|--------------|--------------|--------------|
| 6 | -1.489895000 | -1.243060000 | 1.134571000  |
| 1 | -1.394493000 | -2.294250000 | 0.850794000  |
| 1 | -1.526822000 | -0.712951000 | 0.105230000  |
| 1 | -2.870603000 | 0.124943000  | 2.042928000  |
| 1 | -0.466704000 | -0.024950000 | 2.652685000  |
| 1 | 0.373555000  | -1.568880000 | 2.248986000  |
| 6 | -0.193551000 | 1.318954000  | -1.479991000 |
| 6 | -0.083428000 | 0.011816000  | -1.897940000 |
| 1 | 0.718480000  | 1.913109000  | -1.484041000 |
| 1 | 0.871652000  | -0.359797000 | -2.250276000 |
| 1 | -0.953121000 | -0.565848000 | -2.199598000 |
| 6 | -1.423521000 | 2.118623000  | -1.339147000 |
| 6 | -2.716796000 | 1.573614000  | -1.448701000 |
| 1 | -2.856717000 | 0.509159000  | -1.612185000 |
| 6 | -1.297243000 | 3.506930000  | -1.142746000 |
| 1 | -0.305602000 | 3.948246000  | -1.078822000 |
| 6 | -2.420428000 | 4.326455000  | -1.063409000 |
| 6 | -3.838839000 | 2.392961000  | -1.365872000 |
| 6 | -3.695987000 | 3.770277000  | -1.172684000 |
| 1 | -4.826370000 | 1.951653000  | -1.453918000 |
| 1 | -2.300106000 | 5.396642000  | -0.923636000 |
| 1 | -4.574632000 | 4.405878000  | -1.113910000 |
| 6 | -3.031162000 | -1.763760000 | 3.060569000  |
| 1 | -3.988115000 | -1.534556000 | 3.538858000  |
| 1 | -3.018298000 | -2.837840000 | 2.842274000  |
| 1 | -2.228974000 | -1.549557000 | 3.775428000  |
| 6 | -4.038742000 | -1.176741000 | 0.823436000  |
| 6 | -5.110338000 | -0.273041000 | 0.804038000  |
| 1 | -5.074098000 | 0.610945000  | 1.437043000  |
| 6 | -4.115866000 | -2.314100000 | 0.005515000  |
| 1 | -3.314840000 | -3.049447000 | 0.012614000  |
| 6 | -5.224864000 | -2.534605000 | -0.814054000 |
| 6 | -6.224800000 | -0.494648000 | -0.006668000 |
| 6 | -6.283512000 | -1.625501000 | -0.823300000 |
| 1 | -7.048334000 | 0.214402000  | 0.003049000  |
| 1 | -5.264518000 | -3.422966000 | -1.438414000 |
| 1 | -7.149153000 | -1.800101000 | -1.455657000 |

S38

E + ZPE = -3168.567103

|    |              |              |              |
|----|--------------|--------------|--------------|
| 28 | -0.325408000 | -0.470207000 | -0.806161000 |
| 15 | -1.689827000 | -0.410704000 | 0.838425000  |
| 6  | -1.532711000 | -1.770723000 | 2.140377000  |
| 1  | -2.563140000 | -2.054279000 | 2.383530000  |
| 6  | -0.934305000 | -1.048932000 | 3.367414000  |
| 1  | -1.099800000 | -1.641339000 | 4.274648000  |
| 1  | 0.152511000  | -0.947787000 | 3.249940000  |
| 6  | -1.581510000 | 0.339790000  | 3.464950000  |
| 1  | -1.085061000 | 0.968996000  | 4.212427000  |
| 1  | -2.629367000 | 0.243683000  | 3.780346000  |
| 6  | -1.515109000 | 1.004322000  | 2.071749000  |
| 1  | -0.489469000 | 1.354704000  | 1.903080000  |
| 6  | -2.469163000 | 2.182892000  | 1.871879000  |
| 1  | -3.513809000 | 1.893042000  | 2.020233000  |
| 1  | -2.377067000 | 2.611823000  | 0.868618000  |
| 1  | -2.235084000 | 2.975186000  | 2.591676000  |
| 6  | -0.790552000 | -3.038342000 | 1.711536000  |
| 1  | 0.259975000  | -2.841256000 | 1.477763000  |
| 1  | -1.255280000 | -3.504379000 | 0.835320000  |
| 1  | -0.814054000 | -3.773791000 | 2.523869000  |
| 6  | -3.457335000 | -0.501471000 | 0.293401000  |
| 6  | -4.472656000 | -0.675155000 | 1.249491000  |

|   |              |              |              |
|---|--------------|--------------|--------------|
| 1 | -4.219395000 | -0.734811000 | 2.302917000  |
| 6 | -5.815920000 | -0.764823000 | 0.886584000  |
| 1 | -6.574957000 | -0.891021000 | 1.652745000  |
| 6 | -6.172580000 | -0.698620000 | -0.458275000 |
| 1 | -7.212889000 | -0.780536000 | -0.757937000 |
| 6 | -5.180006000 | -0.531609000 | -1.421954000 |
| 1 | -5.458988000 | -0.481237000 | -2.471611000 |
| 6 | -3.829706000 | -0.415689000 | -1.068316000 |
| 6 | -2.850369000 | -0.132272000 | -2.186634000 |
| 1 | -2.466392000 | 0.888831000  | -2.131817000 |
| 1 | -3.343199000 | -0.254965000 | -3.157031000 |
| 8 | -1.663097000 | -0.960179000 | -2.189151000 |
| 6 | -1.923150000 | -2.353674000 | -2.454257000 |
| 1 | -2.486616000 | -2.441245000 | -3.388451000 |
| 1 | -0.953638000 | -2.840353000 | -2.563098000 |
| 1 | -2.485757000 | -2.808018000 | -1.633411000 |
| 1 | 2.668027000  | -1.721396000 | -3.431779000 |
| 6 | 3.394156000  | -1.963136000 | -2.644960000 |
| 6 | 3.144664000  | -1.118661000 | -1.383595000 |
| 1 | 4.396684000  | -1.778070000 | -3.042159000 |
| 1 | 3.315272000  | -3.035622000 | -2.434082000 |
| 1 | 3.204266000  | -0.060656000 | -1.669317000 |
| 6 | 4.195601000  | -1.355076000 | -0.306294000 |
| 6 | 4.412703000  | -2.632851000 | 0.230598000  |
| 6 | 4.975735000  | -0.294246000 | 0.169251000  |
| 1 | 3.830624000  | -3.480007000 | -0.125443000 |
| 1 | 4.828245000  | 0.703462000  | -0.238891000 |
| 6 | 5.379526000  | -2.841132000 | 1.213925000  |
| 6 | 5.946442000  | -0.498101000 | 1.152018000  |
| 1 | 5.535435000  | -3.839510000 | 1.613395000  |
| 1 | 6.544459000  | 0.338943000  | 1.501749000  |
| 6 | 6.150517000  | -1.773337000 | 1.678539000  |
| 1 | 6.906656000  | -1.936369000 | 2.441113000  |
| 6 | 1.220930000  | -0.392768000 | 0.231179000  |
| 6 | 1.724446000  | -1.363599000 | -0.810628000 |
| 1 | 1.032341000  | -1.318745000 | -1.718884000 |
| 1 | 1.642228000  | -2.399436000 | -0.465805000 |
| 1 | 1.225452000  | -0.788597000 | 1.246215000  |
| 1 | 1.702637000  | 0.589994000  | 0.216911000  |
| 6 | 0.021594000  | 2.341421000  | -1.857964000 |
| 6 | 0.464360000  | 1.298967000  | -2.595676000 |
| 1 | -1.033004000 | 2.608987000  | -1.938543000 |
| 1 | 1.516665000  | 1.037561000  | -2.646602000 |
| 1 | -0.184950000 | 0.817185000  | -3.318708000 |
| 6 | 0.793731000  | 3.223521000  | -0.975890000 |
| 6 | 0.110669000  | 4.210769000  | -0.242299000 |
| 1 | -0.968195000 | 4.299650000  | -0.346742000 |
| 6 | 2.194881000  | 3.152554000  | -0.851884000 |
| 1 | 2.755978000  | 2.429588000  | -1.436358000 |
| 6 | 2.879049000  | 4.024147000  | -0.009938000 |
| 6 | 0.795085000  | 5.083641000  | 0.601213000  |
| 6 | 2.182161000  | 4.989744000  | 0.723336000  |
| 1 | 0.248150000  | 5.841593000  | 1.154402000  |
| 1 | 3.960645000  | 3.960546000  | 0.067079000  |
| 1 | 2.720381000  | 5.671914000  | 1.374791000  |

S39

E + ZPE = -3168.578939

|    |              |              |              |
|----|--------------|--------------|--------------|
| 28 | -0.331731000 | 0.399347000  | -0.838097000 |
| 15 | -1.481117000 | -0.921716000 | 0.620025000  |
| 6  | -0.694728000 | -2.465518000 | 1.381980000  |
| 1  | -1.489018000 | -3.218618000 | 1.363545000  |

|   |              |              |              |
|---|--------------|--------------|--------------|
| 6 | -0.429301000 | -2.081409000 | 2.855829000  |
| 1 | -0.331892000 | -2.985085000 | 3.468553000  |
| 1 | 0.524851000  | -1.544268000 | 2.932330000  |
| 6 | -1.574625000 | -1.182838000 | 3.340972000  |
| 1 | -1.351715000 | -0.730616000 | 4.314298000  |
| 1 | -2.491460000 | -1.772292000 | 3.472691000  |
| 6 | -1.806725000 | -0.082777000 | 2.281167000  |
| 1 | -0.993460000 | 0.648473000  | 2.364263000  |
| 6 | -3.136578000 | 0.664167000  | 2.401557000  |
| 1 | -3.994823000 | -0.005135000 | 2.288131000  |
| 1 | -3.223000000 | 1.460858000  | 1.654308000  |
| 1 | -3.206204000 | 1.134128000  | 3.389020000  |
| 6 | 0.512257000  | -3.054441000 | 0.649727000  |
| 1 | 1.368966000  | -2.377745000 | 0.660938000  |
| 1 | 0.280783000  | -3.299075000 | -0.393040000 |
| 1 | 0.820177000  | -3.984707000 | 1.140681000  |
| 6 | -3.123157000 | -1.518556000 | -0.008754000 |
| 6 | -3.855591000 | -2.457503000 | 0.739902000  |
| 1 | -3.469613000 | -2.821025000 | 1.685802000  |
| 6 | -5.090586000 | -2.940717000 | 0.309206000  |
| 1 | -5.629384000 | -3.659938000 | 0.918651000  |
| 6 | -5.620053000 | -2.502549000 | -0.902050000 |
| 1 | -6.573562000 | -2.880931000 | -1.257488000 |
| 6 | -4.910486000 | -1.573427000 | -1.659493000 |
| 1 | -5.321975000 | -1.229416000 | -2.605212000 |
| 6 | -3.681221000 | -1.062610000 | -1.224681000 |
| 6 | -3.051146000 | -0.019514000 | -2.069297000 |
| 1 | -3.133308000 | 0.996310000  | -1.583521000 |
| 1 | -3.558637000 | 0.087119000  | -3.038009000 |
| 8 | -1.639949000 | -0.144959000 | -2.318698000 |
| 6 | -1.313051000 | -1.302333000 | -3.111706000 |
| 1 | -1.863490000 | -1.260627000 | -4.057124000 |
| 1 | -0.241319000 | -1.256670000 | -3.310038000 |
| 1 | -1.559476000 | -2.226018000 | -2.579034000 |
| 6 | 1.107850000  | 0.629807000  | 0.399555000  |
| 6 | 2.386629000  | 0.032194000  | -0.202429000 |
| 1 | 2.183534000  | -0.938347000 | -0.675698000 |
| 1 | 2.782410000  | 0.668733000  | -1.000591000 |
| 1 | 0.902451000  | 0.127124000  | 1.351447000  |
| 1 | 1.220469000  | 1.692210000  | 0.628852000  |
| 6 | -0.488657000 | 2.400949000  | -1.534082000 |
| 6 | 0.504174000  | 1.699659000  | -2.198845000 |
| 1 | 1.549336000  | 1.914603000  | -2.013877000 |
| 1 | -1.496547000 | 2.332418000  | -1.942381000 |
| 1 | 0.282016000  | 1.237003000  | -3.156533000 |
| 6 | -0.331633000 | 3.498390000  | -0.569824000 |
| 6 | -1.478006000 | 3.991255000  | 0.081601000  |
| 1 | -2.447215000 | 3.546452000  | -0.135305000 |
| 6 | 0.906481000  | 4.112268000  | -0.302431000 |
| 1 | 1.800347000  | 3.780734000  | -0.821599000 |
| 6 | 0.992271000  | 5.169628000  | 0.598764000  |
| 6 | -1.392025000 | 5.046408000  | 0.986000000  |
| 6 | -0.153941000 | 5.636697000  | 1.249175000  |
| 1 | -2.288246000 | 5.415608000  | 1.475704000  |
| 1 | 1.952756000  | 5.640691000  | 0.785499000  |
| 1 | -0.083380000 | 6.466432000  | 1.946241000  |
| 6 | 3.524326000  | -0.190733000 | 0.839685000  |
| 1 | 3.112668000  | -0.821298000 | 1.641095000  |
| 6 | 4.680032000  | -0.958877000 | 0.213278000  |
| 6 | 5.456545000  | -0.403683000 | -0.815195000 |
| 1 | 5.246949000  | 0.602389000  | -1.171216000 |
| 6 | 4.990117000  | -2.253279000 | 0.650308000  |
| 1 | 4.406668000  | -2.699751000 | 1.453292000  |
| 6 | 6.042390000  | -2.974229000 | 0.082461000  |

|   |             |              |              |
|---|-------------|--------------|--------------|
| 6 | 6.507735000 | -1.120182000 | -1.387133000 |
| 6 | 6.804670000 | -2.409522000 | -0.940140000 |
| 1 | 7.098878000 | -0.669545000 | -2.179863000 |
| 1 | 6.268187000 | -3.974176000 | 0.443071000  |
| 1 | 7.625886000 | -2.966205000 | -1.382583000 |
| 6 | 3.985914000 | 1.129831000  | 1.481730000  |
| 1 | 4.369402000 | 1.827333000  | 0.727444000  |
| 1 | 3.165758000 | 1.626446000  | 2.011684000  |
| 1 | 4.790760000 | 0.946593000  | 2.200478000  |

S40

E + ZPE = -3168.562369

|    |              |              |              |
|----|--------------|--------------|--------------|
| 28 | -0.399580000 | 0.187623000  | -1.038784000 |
| 15 | -2.393221000 | 0.123501000  | 0.280353000  |
| 6  | -2.548156000 | 1.012296000  | 1.944185000  |
| 1  | -3.086626000 | 0.332983000  | 2.611231000  |
| 6  | -3.478816000 | 2.210049000  | 1.655352000  |
| 1  | -3.902673000 | 2.589525000  | 2.591963000  |
| 1  | -2.897762000 | 3.030332000  | 1.212805000  |
| 6  | -4.557060000 | 1.746076000  | 0.676922000  |
| 1  | -5.181558000 | 2.575108000  | 0.323821000  |
| 1  | -5.226416000 | 1.025698000  | 1.166409000  |
| 6  | -3.851261000 | 1.065495000  | -0.512988000 |
| 1  | -3.369543000 | 1.850138000  | -1.113375000 |
| 6  | -4.807353000 | 0.276702000  | -1.411401000 |
| 1  | -5.218118000 | -0.598102000 | -0.898016000 |
| 1  | -4.337148000 | -0.058454000 | -2.341367000 |
| 1  | -5.647177000 | 0.920652000  | -1.696531000 |
| 6  | -1.239981000 | 1.411580000  | 2.630909000  |
| 1  | -0.670405000 | 2.126832000  | 2.029202000  |
| 1  | -0.602659000 | 0.548017000  | 2.842246000  |
| 1  | -1.468312000 | 1.894502000  | 3.588038000  |
| 6  | -2.959762000 | -1.626446000 | 0.513827000  |
| 6  | -3.555294000 | -2.087279000 | 1.695961000  |
| 1  | -3.727418000 | -1.414932000 | 2.528241000  |
| 6  | -3.953675000 | -3.418394000 | 1.843132000  |
| 1  | -4.415230000 | -3.739883000 | 2.772032000  |
| 6  | -3.763203000 | -4.321226000 | 0.802061000  |
| 1  | -4.071627000 | -5.357021000 | 0.905551000  |
| 6  | -3.170216000 | -3.881512000 | -0.381995000 |
| 1  | -3.024911000 | -4.581949000 | -1.200852000 |
| 6  | -2.763174000 | -2.553547000 | -0.542756000 |
| 6  | -2.133283000 | -2.153165000 | -1.856942000 |
| 1  | -2.599122000 | -1.261350000 | -2.283280000 |
| 1  | -2.242365000 | -2.956732000 | -2.593760000 |
| 8  | -0.729004000 | -1.822146000 | -1.751799000 |
| 6  | 0.122333000  | -2.975758000 | -1.639845000 |
| 1  | -0.077172000 | -3.661454000 | -2.470934000 |
| 1  | 1.149434000  | -2.620434000 | -1.704928000 |
| 1  | -0.038126000 | -3.491591000 | -0.687211000 |
| 6  | 0.918748000  | 0.041872000  | 0.336619000  |
| 6  | 2.333320000  | -0.347281000 | -0.037802000 |
| 1  | 2.345902000  | -1.185900000 | -0.742344000 |
| 1  | 2.851126000  | 0.484597000  | -0.525170000 |
| 1  | 0.455288000  | -0.739241000 | 0.957067000  |
| 1  | 0.885124000  | 0.997772000  | 0.859986000  |
| 6  | 0.013856000  | 1.977766000  | -1.807151000 |
| 6  | 0.698245000  | 0.938980000  | -2.475540000 |
| 1  | 1.775249000  | 0.843163000  | -2.403428000 |
| 1  | -0.979841000 | 2.234665000  | -2.192775000 |
| 1  | 0.277866000  | 0.529852000  | -3.395620000 |
| 6  | 0.616397000  | 3.082324000  | -1.032821000 |

|   |              |              |              |
|---|--------------|--------------|--------------|
| 6 | -0.230027000 | 4.002078000  | -0.387110000 |
| 1 | -1.308058000 | 3.887647000  | -0.480292000 |
| 6 | 2.004842000  | 3.279176000  | -0.938212000 |
| 1 | 2.683712000  | 2.622498000  | -1.472860000 |
| 6 | 2.525015000  | 4.341529000  | -0.201008000 |
| 6 | 0.287983000  | 5.065177000  | 0.348791000  |
| 6 | 1.670757000  | 5.234129000  | 0.450407000  |
| 1 | -0.384516000 | 5.767526000  | 0.832837000  |
| 1 | 3.600653000  | 4.483698000  | -0.149781000 |
| 1 | 2.079099000  | 6.065564000  | 1.017135000  |
| 6 | 3.176467000  | -0.778456000 | 1.208985000  |
| 1 | 2.632775000  | -1.598815000 | 1.698016000  |
| 6 | 4.519172000  | -1.334520000 | 0.757048000  |
| 6 | 5.491761000  | -0.511958000 | 0.168631000  |
| 1 | 5.298499000  | 0.550379000  | 0.038490000  |
| 6 | 4.809713000  | -2.695717000 | 0.916089000  |
| 1 | 4.072107000  | -3.349481000 | 1.377450000  |
| 6 | 6.035199000  | -3.223409000 | 0.505361000  |
| 6 | 6.716743000  | -1.034918000 | -0.245070000 |
| 6 | 6.992875000  | -2.393713000 | -0.078243000 |
| 1 | 7.458540000  | -0.380093000 | -0.694187000 |
| 1 | 6.242038000  | -4.280805000 | 0.646237000  |
| 1 | 7.948397000  | -2.800301000 | -0.396960000 |
| 6 | 3.330841000  | 0.358867000  | 2.234380000  |
| 1 | 3.791353000  | 1.246682000  | 1.785939000  |
| 1 | 2.363238000  | 0.661014000  | 2.650298000  |
| 1 | 3.966948000  | 0.038109000  | 3.065079000  |

**S41**

E + ZPE = -3168.562736

|    |              |              |              |
|----|--------------|--------------|--------------|
| 28 | -0.318833000 | 0.090833000  | -0.951203000 |
| 15 | -2.392123000 | 0.134293000  | 0.277219000  |
| 6  | -2.566250000 | 0.911183000  | 1.995204000  |
| 1  | -2.980953000 | 0.134681000  | 2.644981000  |
| 6  | -3.606849000 | 2.049216000  | 1.828439000  |
| 1  | -4.127514000 | 2.227312000  | 2.775906000  |
| 1  | -3.078359000 | 2.978997000  | 1.579113000  |
| 6  | -4.574305000 | 1.696130000  | 0.694274000  |
| 1  | -5.201878000 | 2.550287000  | 0.412850000  |
| 1  | -5.253982000 | 0.889957000  | 0.999734000  |
| 6  | -3.725327000 | 1.229637000  | -0.502964000 |
| 1  | -3.171592000 | 2.099192000  | -0.884811000 |
| 6  | -4.522697000 | 0.614041000  | -1.654340000 |
| 1  | -5.063885000 | -0.282619000 | -1.336996000 |
| 1  | -3.886087000 | 0.345356000  | -2.505651000 |
| 1  | -5.260562000 | 1.336459000  | -2.020979000 |
| 6  | -1.254048000 | 1.396486000  | 2.620060000  |
| 1  | -0.761664000 | 2.146557000  | 1.991818000  |
| 1  | -0.552394000 | 0.575174000  | 2.793362000  |
| 1  | -1.462523000 | 1.862313000  | 3.590173000  |
| 6  | -3.174122000 | -1.543715000 | 0.369052000  |
| 6  | -4.110134000 | -1.879638000 | 1.359017000  |
| 1  | -4.392452000 | -1.156466000 | 2.115987000  |
| 6  | -4.714989000 | -3.137856000 | 1.397550000  |
| 1  | -5.437615000 | -3.363109000 | 2.176200000  |
| 6  | -4.392604000 | -4.092437000 | 0.437593000  |
| 1  | -4.855728000 | -5.074195000 | 0.457596000  |
| 6  | -3.465117000 | -3.776540000 | -0.555248000 |
| 1  | -3.214100000 | -4.519383000 | -1.308565000 |
| 6  | -2.852727000 | -2.519668000 | -0.607613000 |
| 6  | -1.874709000 | -2.256727000 | -1.731887000 |
| 1  | -2.151032000 | -1.375215000 | -2.321992000 |

|   |              |              |              |
|---|--------------|--------------|--------------|
| 1 | -1.854423000 | -3.107041000 | -2.422847000 |
| 8 | -0.523931000 | -2.001340000 | -1.289360000 |
| 6 | 0.119929000  | -3.150355000 | -0.713164000 |
| 1 | 0.112374000  | -3.973770000 | -1.435903000 |
| 1 | 1.148968000  | -2.864899000 | -0.502037000 |
| 1 | -0.382945000 | -3.461389000 | -0.208205000 |
| 6 | 1.061466000  | 0.018799000  | 0.360077000  |
| 6 | 2.473432000  | -0.359773000 | -0.030228000 |
| 1 | 2.480692000  | -1.195640000 | -0.739633000 |
| 1 | 2.974449000  | 0.476605000  | -0.527729000 |
| 1 | 0.613021000  | -0.746026000 | 1.011574000  |
| 1 | 1.014353000  | 0.995346000  | 0.845905000  |
| 6 | 0.011536000  | 1.857169000  | -1.208602000 |
| 6 | 0.727362000  | 0.810784000  | -2.431867000 |
| 1 | 1.807675000  | 0.753251000  | -2.372913000 |
| 1 | -0.986522000 | 2.071046000  | -2.202991000 |
| 1 | 0.311570000  | 0.344865000  | -3.327765000 |
| 6 | 0.586124000  | 3.007300000  | -1.074292000 |
| 6 | -0.281803000 | 3.929409000  | -0.461224000 |
| 1 | -1.357193000 | 3.788252000  | -0.548272000 |
| 6 | 1.969280000  | 3.239789000  | -0.985355000 |
| 1 | 2.664446000  | 2.578613000  | -1.492705000 |
| 6 | 2.464007000  | 4.340561000  | -0.287913000 |
| 6 | 0.210819000  | 5.030267000  | 0.235883000  |
| 6 | 1.588935000  | 5.236010000  | 0.330876000  |
| 1 | -0.478593000 | 5.733027000  | 0.694973000  |
| 1 | 3.536098000  | 4.508809000  | -0.241333000 |
| 1 | 1.977189000  | 6.096437000  | 0.867635000  |
| 6 | 3.339809000  | -0.779714000 | 1.203254000  |
| 1 | 2.816226000  | -1.609554000 | 1.699027000  |
| 6 | 4.685405000  | -1.312859000 | 0.732978000  |
| 6 | 5.637025000  | -0.472796000 | 0.135218000  |
| 1 | 5.425543000  | 0.586847000  | 0.011726000  |
| 6 | 4.999358000  | -2.669822000 | 0.882699000  |
| 1 | 4.278959000  | -3.337850000 | 1.352094000  |
| 6 | 6.227143000  | -3.176823000 | 0.453199000  |
| 6 | 6.864332000  | -0.974928000 | -0.296882000 |
| 6 | 7.163757000  | -2.329928000 | -0.139682000 |
| 1 | 7.589615000  | -0.306778000 | -0.753242000 |
| 1 | 6.452170000  | -4.231447000 | 0.586575000  |
| 1 | 8.120955000  | -2.720285000 | -0.473252000 |
| 6 | 3.486806000  | 0.358723000  | 2.228602000  |
| 1 | 3.927057000  | 1.254490000  | 1.775629000  |
| 1 | 2.518664000  | 0.644154000  | 2.655388000  |
| 1 | 4.137525000  | 0.048325000  | 3.051803000  |

**S42**

E + ZPE = -3168.558847

|    |              |              |              |
|----|--------------|--------------|--------------|
| 28 | -0.316342000 | 0.167973000  | -0.726077000 |
| 15 | -2.279660000 | 0.340004000  | 0.287086000  |
| 6  | -2.665067000 | 1.235682000  | 1.914954000  |
| 1  | -3.122910000 | 0.492370000  | 2.572317000  |
| 6  | -3.721257000 | 2.315183000  | 1.549229000  |
| 1  | -4.388674000 | 2.490648000  | 2.399869000  |
| 1  | -3.201880000 | 3.262856000  | 1.354684000  |
| 6  | -4.483572000 | 1.895137000  | 0.290406000  |
| 1  | -5.080940000 | 2.719486000  | -0.116566000 |
| 1  | -5.177538000 | 1.072479000  | 0.506119000  |
| 6  | -3.434902000 | 1.434949000  | -0.737076000 |
| 1  | -2.817905000 | 2.306257000  | -0.998369000 |
| 6  | -4.020179000 | 0.841645000  | -2.019291000 |
| 1  | -4.564406000 | -0.088154000 | -1.825988000 |

|   |              |              |              |
|---|--------------|--------------|--------------|
| 1 | -3.252938000 | 0.644066000  | -2.776225000 |
| 1 | -4.726418000 | 1.553515000  | -2.460771000 |
| 6 | -1.471488000 | 1.834265000  | 2.666696000  |
| 1 | -0.877718000 | 2.500904000  | 2.032562000  |
| 1 | -0.813497000 | 1.064699000  | 3.076890000  |
| 1 | -1.848113000 | 2.4271133000 | 3.508243000  |
| 6 | -3.143199000 | -1.301642000 | 0.347541000  |
| 6 | -4.105586000 | -1.588232000 | 1.328558000  |
| 1 | -4.350602000 | -0.860314000 | 2.092459000  |
| 6 | -4.792435000 | -2.803832000 | 1.350239000  |
| 1 | -5.532211000 | -2.987577000 | 2.123573000  |
| 6 | -4.530253000 | -3.765513000 | 0.380453000  |
| 1 | -5.058180000 | -4.714182000 | 0.384942000  |
| 6 | -3.577229000 | -3.498854000 | -0.602384000 |
| 1 | -3.369926000 | -4.247794000 | -1.362686000 |
| 6 | -2.878188000 | -2.287445000 | -0.638686000 |
| 6 | -1.863218000 | -2.098348000 | -1.747511000 |
| 1 | -2.039352000 | -1.178555000 | -2.314593000 |
| 1 | -1.933322000 | -2.929919000 | -2.459202000 |
| 8 | -0.506148000 | -1.997811000 | -1.286735000 |
| 6 | -0.003112000 | -3.222521000 | -0.732370000 |
| 1 | -0.117247000 | -4.031894000 | -1.463269000 |
| 1 | 1.056513000  | -3.071320000 | -0.529650000 |
| 1 | -0.527213000 | -3.486519000 | 0.192401000  |
| 6 | 0.628937000  | -0.065694000 | 0.904697000  |
| 6 | 2.003030000  | -0.435331000 | 0.380824000  |
| 1 | 1.934250000  | -1.183080000 | -0.417842000 |
| 1 | 2.491862000  | 0.444030000  | -0.049953000 |
| 1 | 0.186606000  | -0.862236000 | 1.514402000  |
| 1 | 0.631944000  | 0.869430000  | 1.461371000  |
| 6 | 0.202895000  | 1.888364000  | -1.790668000 |
| 6 | 0.604573000  | 0.747281000  | -2.474851000 |
| 1 | 1.642416000  | 0.430833000  | -2.514577000 |
| 1 | -0.780296000 | 2.292182000  | -2.039950000 |
| 1 | -0.027138000 | 0.338574000  | -3.262466000 |
| 6 | 1.079938000  | 2.861044000  | -1.101236000 |
| 6 | 0.500256000  | 3.881085000  | -0.325864000 |
| 1 | -0.583603000 | 3.939979000  | -0.246863000 |
| 6 | 2.479689000  | 2.835150000  | -1.226822000 |
| 1 | 2.953123000  | 2.095366000  | -1.865415000 |
| 6 | 3.270209000  | 3.781555000  | -0.576743000 |
| 6 | 1.289325000  | 4.826986000  | 0.325066000  |
| 6 | 2.680061000  | 4.775780000  | 0.207093000  |
| 1 | 0.820505000  | 5.609738000  | 0.914459000  |
| 1 | 4.349389000  | 3.754172000  | -0.697853000 |
| 1 | 3.298102000  | 5.515726000  | 0.706824000  |
| 6 | 2.945227000  | -1.030973000 | 1.482325000  |
| 1 | 2.414826000  | -1.879322000 | 1.936373000  |
| 6 | 4.207343000  | -1.578309000 | 0.833322000  |
| 6 | 5.149299000  | -0.728753000 | 0.233245000  |
| 1 | 4.995285000  | 0.347777000  | 0.246905000  |
| 6 | 4.445141000  | -2.958822000 | 0.804511000  |
| 1 | 3.732989000  | -3.634096000 | 1.275223000  |
| 6 | 5.589486000  | -3.480119000 | 0.197714000  |
| 6 | 6.292925000  | -1.245282000 | -0.375428000 |
| 6 | 6.516736000  | -2.623798000 | -0.396278000 |
| 1 | 7.013377000  | -0.570805000 | -0.830274000 |
| 1 | 5.757650000  | -4.553602000 | 0.194461000  |
| 1 | 7.409158000  | -3.025372000 | -0.867645000 |
| 6 | 3.244042000  | -0.012005000 | 2.594789000  |
| 1 | 3.716191000  | 0.892748000  | 2.195222000  |
| 1 | 2.328481000  | 0.291193000  | 3.114691000  |
| 1 | 3.924449000  | -0.443998000 | 3.335178000  |

**S43**

E + ZPE = -3168.572953

|    |              |              |              |
|----|--------------|--------------|--------------|
| 28 | -0.002881000 | 0.273134000  | -0.076857000 |
| 15 | -2.104333000 | 0.805004000  | 0.082816000  |
| 6  | -2.463898000 | 1.972665000  | 1.508792000  |
| 1  | -2.717400000 | 1.367774000  | 2.383943000  |
| 6  | -3.672624000 | 2.858920000  | 1.062694000  |
| 1  | -4.502740000 | 2.769325000  | 1.770587000  |
| 1  | -3.357187000 | 3.907777000  | 1.089143000  |
| 6  | -4.129499000 | 2.494920000  | -0.365233000 |
| 1  | -4.563322000 | 3.361884000  | -0.876621000 |
| 1  | -4.908715000 | 1.724122000  | -0.338774000 |
| 6  | -2.923738000 | 1.956715000  | -1.159855000 |
| 1  | -2.199827000 | 2.774413000  | -1.290265000 |
| 6  | -3.301682000 | 1.404275000  | -2.534335000 |
| 1  | -3.975629000 | 0.545295000  | -2.449900000 |
| 1  | -2.428042000 | 1.105676000  | -3.122675000 |
| 1  | -3.825629000 | 2.177063000  | -3.107805000 |
| 6  | -1.245970000 | 2.837196000  | 1.875086000  |
| 1  | -0.913848000 | 3.446278000  | 1.027320000  |
| 1  | -0.393804000 | 2.244245000  | 2.218585000  |
| 1  | -1.520315000 | 3.525800000  | 2.682084000  |
| 6  | -3.264832000 | -0.625249000 | 0.258383000  |
| 6  | -4.245091000 | -0.617255000 | 1.263973000  |
| 1  | -4.326071000 | 0.216410000  | 1.951488000  |
| 6  | -5.152154000 | -1.668785000 | 1.407155000  |
| 1  | -5.897819000 | -1.630755000 | 2.195645000  |
| 6  | -5.103008000 | -2.749450000 | 0.532491000  |
| 1  | -5.809678000 | -3.568494000 | 0.626331000  |
| 6  | -4.139210000 | -2.767808000 | -0.475470000 |
| 1  | -4.108605000 | -3.603069000 | -1.170719000 |
| 6  | -3.209669000 | -1.731914000 | -0.626411000 |
| 6  | -2.172114000 | -1.862806000 | -1.726509000 |
| 1  | -1.954012000 | -0.896615000 | -2.182746000 |
| 1  | -2.558623000 | -2.519785000 | -2.518702000 |
| 8  | -0.910277000 | -2.353662000 | -1.272357000 |
| 6  | -0.896754000 | -3.756985000 | -1.029105000 |
| 1  | -1.208901000 | -4.311653000 | -1.925465000 |
| 1  | 0.132987000  | -4.027405000 | -0.787409000 |
| 1  | -1.547914000 | -4.036308000 | -0.190828000 |
| 6  | 2.006513000  | -2.098986000 | 1.249788000  |
| 6  | -0.110554000 | -0.627180000 | 1.595940000  |
| 6  | 1.353399000  | -0.695692000 | 1.321028000  |
| 1  | 1.930571000  | -0.021182000 | 1.962553000  |
| 1  | 1.573856000  | -0.244156000 | 0.274515000  |
| 1  | 1.353396000  | -2.715538000 | 0.620793000  |
| 1  | -0.649455000 | -1.573334000 | 1.526342000  |
| 1  | -0.405251000 | -0.056638000 | 2.476145000  |
| 6  | 0.825617000  | 1.760298000  | -1.388790000 |
| 6  | 0.675579000  | 0.542879000  | -2.019600000 |
| 1  | 0.020681000  | 2.484419000  | -1.500956000 |
| 1  | 1.514805000  | -0.131436000 | -2.169525000 |
| 1  | -0.172858000 | 0.375505000  | -2.674829000 |
| 6  | 2.054638000  | 2.328045000  | -0.807384000 |
| 6  | 1.992525000  | 3.610571000  | -0.231402000 |
| 1  | 1.047372000  | 4.148171000  | -0.227870000 |
| 6  | 3.295252000  | 1.661398000  | -0.829935000 |
| 1  | 3.386185000  | 0.678628000  | -1.283091000 |
| 6  | 4.427468000  | 2.260141000  | -0.286842000 |
| 6  | 3.127412000  | 4.209845000  | 0.310160000  |
| 6  | 4.348251000  | 3.533743000  | 0.286371000  |
| 1  | 3.060577000  | 5.203674000  | 0.742717000  |



|   |             |              |              |
|---|-------------|--------------|--------------|
| 1 | 5.375027000 | 1.731246000  | -0.315626000 |
| 1 | 5.236489000 | 3.998622000  | 0.704035000  |
| 6 | 2.045349000 | -2.730103000 | 2.651306000  |
| 1 | 2.496932000 | -3.725976000 | 2.611284000  |
| 1 | 2.630104000 | -2.125822000 | 3.353501000  |
| 1 | 1.034452000 | -2.826637000 | 3.061423000  |
| 6 | 3.368200000 | -2.035412000 | 0.570048000  |
| 6 | 3.501410000 | -2.440687000 | -0.766054000 |
| 1 | 2.636981000 | -2.844085000 | -1.290506000 |
| 6 | 4.501603000 | -1.539564000 | 1.230273000  |
| 1 | 4.433589000 | -1.224069000 | 2.268064000  |
| 6 | 5.730399000 | -1.451936000 | 0.573914000  |
| 6 | 4.728175000 | -2.351215000 | -1.428043000 |
| 6 | 5.847778000 | -1.854807000 | -0.758322000 |
| 1 | 4.811296000 | -2.681129000 | -2.459961000 |
| 1 | 6.599440000 | -1.076784000 | 1.107625000  |
| 1 | 6.806157000 | -1.793638000 | -1.265909000 |

**S44**

E + ZPE = -3168.566645

|    |              |              |              |
|----|--------------|--------------|--------------|
| 28 | -0.476360000 | 0.453128000  | 0.537096000  |
| 15 | 1.532055000  | -0.428499000 | 0.860276000  |
| 6  | 2.893063000  | 0.768530000  | 1.352778000  |
| 1  | 3.314401000  | 1.207299000  | 0.445568000  |
| 6  | 3.952614000  | -0.067317000 | 2.140815000  |
| 1  | 4.903295000  | -0.100188000 | 1.599581000  |
| 1  | 4.156390000  | 0.444242000  | 3.087502000  |
| 6  | 3.438502000  | -1.499397000 | 2.414540000  |
| 1  | 3.779129000  | -1.865907000 | 3.389620000  |
| 1  | 3.828482000  | -2.197079000 | 1.664761000  |
| 6  | 1.898700000  | -1.515077000 | 2.356947000  |
| 1  | 1.512962000  | -0.932259000 | 3.203967000  |
| 6  | 1.313030000  | -2.925213000 | 2.417395000  |
| 1  | 1.644453000  | -3.534947000 | 1.570375000  |
| 1  | 0.217773000  | -2.929183000 | 2.440019000  |
| 1  | 1.655989000  | -3.422698000 | 3.331528000  |
| 6  | 2.342224000  | 1.921828000  | 2.210609000  |
| 1  | 1.886558000  | 1.558218000  | 3.138541000  |
| 1  | 1.610382000  | 2.526708000  | 1.669683000  |
| 1  | 3.170035000  | 2.580489000  | 2.495838000  |
| 6  | 2.175738000  | -1.416067000 | -0.571482000 |
| 6  | 3.469724000  | -1.171407000 | -1.059745000 |
| 1  | 4.085928000  | -0.398848000 | -0.615556000 |
| 6  | 4.007188000  | -1.914302000 | -2.112582000 |
| 1  | 5.012212000  | -1.699861000 | -2.463795000 |
| 6  | 3.258077000  | -2.933177000 | -2.692792000 |
| 1  | 3.668822000  | -3.528582000 | -3.502602000 |
| 6  | 1.971341000  | -3.187472000 | -2.219060000 |
| 1  | 1.389002000  | -3.991227000 | -2.662781000 |
| 6  | 1.404499000  | -2.440023000 | -1.178708000 |
| 6  | -0.030548000 | -2.747220000 | -0.789729000 |
| 1  | -0.201445000 | -2.599099000 | 0.277700000  |
| 1  | -0.255084000 | -3.799787000 | -1.015349000 |
| 8  | -0.988138000 | -1.904226000 | -1.431700000 |
| 6  | -1.237966000 | -2.228152000 | -2.795277000 |
| 1  | -1.527675000 | -3.283446000 | -2.901933000 |
| 1  | -2.070956000 | -1.599348000 | -3.117721000 |
| 1  | -0.366553000 | -2.032092000 | -3.433224000 |
| 6  | -3.208400000 | -0.567789000 | 1.627867000  |
| 6  | -0.931794000 | 0.171563000  | 2.520755000  |
| 6  | -2.115548000 | 0.464138000  | 1.876028000  |
| 1  | -2.441920000 | 1.505790000  | 1.868406000  |

|   |              |              |              |
|---|--------------|--------------|--------------|
| 1 | -1.888310000 | 0.792537000  | -0.295305000 |
| 1 | -2.724990000 | -1.527482000 | 1.403895000  |
| 1 | -0.385747000 | 0.945533000  | 3.055322000  |
| 1 | -0.741788000 | -0.847276000 | 2.848544000  |
| 6 | 0.133742000  | 1.185518000  | -1.147544000 |
| 6 | -1.351474000 | 1.252015000  | -1.215072000 |
| 1 | 0.557087000  | 0.421620000  | -1.796002000 |
| 1 | -1.769435000 | 0.621140000  | -1.998892000 |
| 1 | -1.765874000 | 2.259974000  | -1.252577000 |
| 6 | 0.919027000  | 2.441076000  | -1.144985000 |
| 6 | 0.462772000  | 3.625163000  | -0.533046000 |
| 1 | -0.506102000 | 3.647290000  | -0.039170000 |
| 6 | 2.173256000  | 2.468133000  | -1.783369000 |
| 1 | 2.534192000  | 1.569934000  | -2.278726000 |
| 6 | 2.939298000  | 3.631937000  | -1.815766000 |
| 6 | 1.230125000  | 4.787931000  | -0.561329000 |
| 6 | 2.472001000  | 4.796159000  | -1.201438000 |
| 1 | 0.855685000  | 5.691357000  | -0.088650000 |
| 1 | 3.896185000  | 3.634281000  | -2.330070000 |
| 1 | 3.064880000  | 5.705473000  | -1.230319000 |
| 6 | -4.020689000 | -0.752223000 | 2.935080000  |
| 1 | -4.805353000 | -1.500245000 | 2.785224000  |
| 1 | -3.372828000 | -1.082304000 | 3.753756000  |
| 1 | -4.502624000 | 0.182965000  | 3.239249000  |
| 6 | -4.124231000 | -0.219918000 | 0.459891000  |
| 6 | -4.839136000 | 0.987326000  | 0.428384000  |
| 1 | -4.743220000 | 1.701041000  | 1.243963000  |
| 6 | -4.300256000 | -1.126300000 | -0.593853000 |
| 1 | -3.752294000 | -2.064814000 | -0.585512000 |
| 6 | -5.163558000 | -0.835867000 | -1.652692000 |
| 6 | -5.697795000 | 1.283233000  | -0.631449000 |
| 6 | -5.863433000 | 0.371236000  | -1.675867000 |
| 1 | -6.245936000 | 2.221236000  | -0.634865000 |
| 1 | -5.295624000 | -1.557232000 | -2.454703000 |
| 1 | -6.538280000 | 0.597298000  | -2.496346000 |

**S45**

E + ZPE = -3168.559876

|    |              |              |              |
|----|--------------|--------------|--------------|
| 28 | -0.350821000 | 0.744316000  | 0.198744000  |
| 15 | 1.801220000  | 0.399065000  | 0.522813000  |
| 6  | 2.821979000  | 1.975524000  | 0.390191000  |
| 1  | 2.974730000  | 2.223731000  | -0.664561000 |
| 6  | 4.171669000  | 1.672991000  | 1.105761000  |
| 1  | 4.963958000  | 1.485606000  | 0.375857000  |
| 1  | 4.474665000  | 2.562075000  | 1.668669000  |
| 6  | 4.021954000  | 0.451780000  | 2.049749000  |
| 1  | 4.481982000  | 0.640754000  | 3.026086000  |
| 1  | 4.534775000  | -0.418717000 | 1.625730000  |
| 6  | 2.531977000  | 0.099633000  | 2.240914000  |
| 1  | 2.060656000  | 0.888749000  | 2.840477000  |
| 6  | 2.332319000  | -1.231326000 | 2.963529000  |
| 1  | 2.794086000  | -2.061343000 | 2.419751000  |
| 1  | 1.277004000  | -1.469801000 | 3.133557000  |
| 1  | 2.814999000  | -1.180420000 | 3.946244000  |
| 6  | 2.098864000  | 3.166021000  | 1.047882000  |
| 1  | 1.907191000  | 2.995466000  | 2.112488000  |
| 1  | 1.149326000  | 3.399034000  | 0.560505000  |
| 1  | 2.737613000  | 4.053645000  | 0.975324000  |
| 6  | 2.645070000  | -0.834357000 | -0.585099000 |
| 6  | 3.639760000  | -0.387863000 | -1.473207000 |
| 1  | 3.878559000  | 0.666174000  | -1.543914000 |
| 6  | 4.360656000  | -1.272925000 | -2.274552000 |

|   |              |              |              |   |              |              |              |
|---|--------------|--------------|--------------|---|--------------|--------------|--------------|
| 1 | 5.121174000  | -0.890655000 | -2.948915000 | 1 | 2.146138000  | 1.891378000  | 2.664534000  |
| 6 | 4.119583000  | -2.640484000 | -2.181026000 | 6 | 2.191080000  | -0.151734000 | 3.454985000  |
| 1 | 4.696449000  | -3.345340000 | -2.772197000 | 1 | 1.557643000  | 0.162258000  | 4.291309000  |
| 6 | 3.128646000  | -3.098701000 | -1.315324000 | 1 | 2.979179000  | -0.783276000 | 3.880777000  |
| 1 | 2.949323000  | -4.167105000 | -1.231822000 | 6 | 1.374276000  | -1.008418000 | 2.435555000  |
| 6 | 2.356002000  | -2.222418000 | -0.539501000 | 1 | 0.306178000  | -0.876185000 | -2.622532000 |
| 6 | 1.213373000  | -2.821688000 | 0.263355000  | 6 | 1.708647000  | -2.500994000 | 2.574251000  |
| 1 | 0.892686000  | -2.149777000 | 1.059228000  | 1 | 2.762382000  | -2.699619000 | 2.352035000  |
| 1 | 1.536562000  | -3.764621000 | 0.730095000  | 1 | 1.106654000  | -3.139186000 | 1.922150000  |
| 8 | 0.033522000  | -3.045366000 | -0.505011000 | 1 | 1.521979000  | -2.813870000 | 3.608310000  |
| 6 | 0.047041000  | -4.196585000 | -1.339688000 | 6 | 3.947608000  | 1.704844000  | 0.541571000  |
| 1 | 0.325329000  | -5.096000000 | -0.771047000 | 1 | 3.274638000  | 2.558764000  | 0.415418000  |
| 1 | -0.970882000 | -4.313542000 | -1.718189000 | 1 | 4.273046000  | 1.369122000  | -0.448077000 |
| 1 | 0.730392000  | -4.084570000 | -2.190843000 | 1 | 4.836707000  | 2.064308000  | 1.072219000  |
| 6 | -2.430128000 | -0.798382000 | 1.874445000  | 6 | 2.221242000  | -1.614980000 | -0.394371000 |
| 1 | -1.589485000 | -1.504942000 | 1.878065000  | 6 | 3.550780000  | -1.773251000 | -0.806766000 |
| 6 | -0.750632000 | 1.119376000  | 2.189694000  | 1 | 4.323416000  | -1.102943000 | -0.445633000 |
| 6 | -1.892271000 | 0.601701000  | 1.617008000  | 6 | 3.913729000  | -2.794952000 | -1.688540000 |
| 1 | -2.624712000 | 1.318090000  | 1.249442000  | 1 | 4.951040000  | -2.900326000 | -1.992174000 |
| 1 | -1.479848000 | -0.517005000 | -0.996546000 | 6 | 2.947248000  | -3.675444000 | -2.166198000 |
| 1 | -0.623773000 | 2.193224000  | 2.307633000  | 1 | 3.221710000  | -4.476728000 | -2.845670000 |
| 1 | -0.144137000 | 0.502712000  | 2.847483000  | 6 | 1.617764000  | -3.522731000 | -1.765901000 |
| 6 | -0.024073000 | 0.989470000  | -1.660891000 | 1 | 0.863564000  | -4.214202000 | -2.133618000 |
| 6 | -0.827445000 | -0.272172000 | -1.868423000 | 6 | 1.234951000  | -2.498638000 | -0.895394000 |
| 1 | 0.959657000  | 1.000443000  | -2.123288000 | 6 | -0.223026000 | -2.343557000 | -0.518050000 |
| 1 | -0.186446000 | -1.137517000 | -2.020515000 | 1 | -0.341589000 | -2.185206000 | 0.557238000  |
| 1 | -1.536070000 | -0.176642000 | -2.701307000 | 1 | -0.780681000 | -3.253174000 | -0.768433000 |
| 6 | -0.720813000 | 2.270928000  | -1.600829000 | 8 | -0.837183000 | -1.211486000 | -1.148955000 |
| 6 | -2.095087000 | 2.325982000  | -1.264958000 | 6 | -1.537713000 | -1.546442000 | -2.346095000 |
| 1 | -2.690387000 | 1.419563000  | -1.232045000 | 1 | -2.336116000 | -2.267182000 | -2.133214000 |
| 6 | -0.029567000 | 3.494595000  | -1.790903000 | 1 | -1.992513000 | -0.627650000 | -2.721618000 |
| 1 | 1.016658000  | 3.468119000  | -2.084860000 | 1 | -0.861465000 | -1.952122000 | -3.109517000 |
| 6 | -0.675511000 | 4.708693000  | -1.630720000 | 6 | -0.638326000 | 1.849819000  | 1.602080000  |
| 6 | -2.734444000 | 3.558070000  | -1.082647000 | 6 | -1.730225000 | 1.175947000  | 1.118880000  |
| 6 | -2.030746000 | 4.744874000  | -1.259656000 | 1 | -2.367831000 | 1.709930000  | 0.424064000  |
| 1 | -3.792027000 | 3.582736000  | -0.836783000 | 1 | 0.174205000  | 0.414948000  | -3.272641000 |
| 1 | -0.136017000 | 5.636103000  | -1.799082000 | 1 | -0.491059000 | 2.903560000  | 1.373502000  |
| 1 | -2.532756000 | 5.700053000  | -1.137756000 | 1 | -0.117516000 | 1.484939000  | 2.483129000  |
| 6 | -3.427491000 | -1.254473000 | 0.814599000  | 6 | 1.321452000  | 1.444950000  | -1.710198000 |
| 6 | -3.246789000 | -2.472820000 | 0.147596000  | 6 | 1.203503000  | 0.562456000  | -2.941290000 |
| 1 | -2.361835000 | -3.067078000 | 0.357267000  | 1 | 2.362681000  | 1.654906000  | -1.477852000 |
| 6 | -4.571418000 | -0.495396000 | 0.519480000  | 1 | 1.651822000  | -0.420102000 | -2.781174000 |
| 1 | -4.756608000 | 0.440065000  | 1.043582000  | 1 | 1.746071000  | 1.041527000  | -3.767993000 |
| 6 | -5.501135000 | -0.937456000 | -0.422760000 | 6 | 0.461870000  | 2.603632000  | -1.553617000 |
| 6 | -4.179294000 | -2.919901000 | -0.791898000 | 6 | -0.939137000 | 2.395791000  | -1.655525000 |
| 6 | -5.308024000 | -2.153492000 | -1.082014000 | 1 | -1.323173000 | 1.506078000  | -2.146563000 |
| 1 | -4.025201000 | -3.871766000 | -1.293238000 | 6 | 0.922762000  | 3.877695000  | -1.103862000 |
| 1 | -6.383085000 | -0.338344000 | -0.632098000 | 1 | 1.992308000  | 4.048461000  | -1.020146000 |
| 1 | -6.035318000 | -2.501793000 | -1.809664000 | 6 | 0.031580000  | 4.893038000  | -0.829950000 |
| 6 | -3.072163000 | -0.839921000 | 3.285649000  | 6 | -1.835871000 | 3.456468000  | -1.389590000 |
| 1 | -3.904888000 | -0.132967000 | 3.362625000  | 6 | -1.361373000 | 4.683827000  | -0.969370000 |
| 1 | -3.461784000 | -1.841883000 | 3.491069000  | 1 | -2.901689000 | 3.306304000  | -1.537446000 |
| 1 | -2.337165000 | -0.584071000 | 4.056007000  | 1 | 0.399136000  | 5.867979000  | -0.522765000 |
|   |              |              |              | 1 | -2.050388000 | 5.499533000  | -0.771772000 |
|   |              |              |              | 6 | -2.380187000 | -0.026518000 | 1.776850000  |
|   |              |              |              | 1 | -1.604895000 | -0.710351000 | 2.139652000  |
|   |              |              |              | 6 | -3.328809000 | -0.821621000 | 0.885724000  |
|   |              |              |              | 6 | -4.249687000 | -0.199328000 | 0.031231000  |
|   |              |              |              | 1 | -4.279857000 | 0.884714000  | -0.048521000 |
|   |              |              |              | 6 | -3.368261000 | -2.218301000 | 0.991881000  |
|   |              |              |              | 1 | -2.684477000 | -2.721935000 | 1.672544000  |
|   |              |              |              | 6 | -4.280724000 | -2.975033000 | 0.254291000  |
|   |              |              |              | 6 | -5.162311000 | -0.950860000 | -0.711816000 |
|   |              |              |              | 6 | -5.179855000 | -2.342608000 | -0.606242000 |

**S46**

E + ZPE = -3168.572440

|    |             |              |              |
|----|-------------|--------------|--------------|
| 28 | 0.154673000 | 1.060004000  | -0.158111000 |
| 15 | 1.730175000 | -0.242786000 | 0.727272000  |
| 6  | 3.291183000 | 0.592413000  | 1.357038000  |
| 1  | 4.015729000 | -0.222646000 | 1.492970000  |
| 6  | 2.844705000 | 1.049720000  | 2.757337000  |
| 1  | 3.704679000 | 1.420077000  | 3.326590000  |

|   |              |              |              |
|---|--------------|--------------|--------------|
| 1 | -5.868839000 | -0.445935000 | -1.364946000 |
| 1 | -4.295428000 | -4.056431000 | 0.360452000  |
| 1 | -5.895535000 | -2.926475000 | -1.177726000 |
| 6 | -3.154145000 | 0.482304000  | 3.026805000  |
| 1 | -2.479065000 | 0.976945000  | 3.732813000  |
| 1 | -3.932095000 | 1.196980000  | 2.738157000  |
| 1 | -3.641071000 | -0.357366000 | 3.532552000  |

**S47**

E + ZPE = -3168.564699

|    |              |              |              |
|----|--------------|--------------|--------------|
| 28 | 0.613591000  | 1.065437000  | -0.291957000 |
| 15 | 1.592130000  | -0.477033000 | 0.913573000  |
| 6  | 2.754341000  | -0.089112000 | 2.323448000  |
| 1  | 3.262646000  | -1.034781000 | 2.559174000  |
| 6  | 1.739524000  | 0.200469000  | 3.446114000  |
| 1  | 2.251521000  | 0.286879000  | 4.410922000  |
| 1  | 1.265392000  | 1.173031000  | 3.257657000  |
| 6  | 0.693108000  | -0.930702000 | 3.467434000  |
| 1  | -0.247149000 | -0.589151000 | 3.912754000  |
| 1  | 1.058141000  | -1.744819000 | 4.103299000  |
| 6  | 0.455257000  | -1.502549000 | 2.030457000  |
| 1  | -0.572781000 | -1.310686000 | 1.710876000  |
| 6  | 0.711198000  | -3.017174000 | 1.986326000  |
| 1  | 1.740518000  | -3.260585000 | 2.271292000  |
| 1  | 0.530437000  | -3.452787000 | 1.000281000  |
| 1  | 0.045139000  | -3.516832000 | 2.699875000  |
| 6  | 3.802817000  | 1.011418000  | 2.155945000  |
| 1  | 3.334175000  | 1.995136000  | 2.052664000  |
| 1  | 4.453249000  | 0.849119000  | 1.290663000  |
| 1  | 4.440216000  | 1.046124000  | 3.046664000  |
| 6  | 2.408763000  | -1.620188000 | -0.261479000 |
| 6  | 3.776437000  | -1.907487000 | -0.157431000 |
| 1  | 4.355718000  | -1.511184000 | 0.669829000  |
| 6  | 4.421433000  | -2.705132000 | -1.105390000 |
| 1  | 5.480851000  | -2.919061000 | -0.999997000 |
| 6  | 3.701160000  | -3.218346000 | -2.179830000 |
| 1  | 4.191167000  | -3.835182000 | -2.926965000 |
| 6  | 2.339556000  | -2.933520000 | -2.296198000 |
| 1  | 1.781132000  | -3.340561000 | -3.135188000 |
| 6  | 1.674304000  | -2.140892000 | -1.354403000 |
| 6  | 0.180403000  | -1.963360000 | -1.521608000 |
| 1  | -0.379499000 | -2.424010000 | -0.696039000 |
| 1  | -0.126347000 | -2.473729000 | -2.441140000 |
| 8  | -0.234378000 | -0.580457000 | -1.620262000 |
| 6  | -1.510238000 | -0.495001000 | -2.279831000 |
| 1  | -2.258236000 | -1.102847000 | -1.763297000 |
| 1  | -1.816982000 | 0.549812000  | -2.257142000 |
| 1  | -1.413570000 | -0.828465000 | -3.320610000 |
| 6  | -1.304617000 | 1.670101000  | 1.371977000  |
| 6  | -2.484563000 | 1.224005000  | 0.905181000  |
| 1  | -2.928195000 | 1.733243000  | 0.049293000  |
| 1  | 2.304691000  | 1.173422000  | -2.825121000 |
| 1  | -0.883571000 | 2.603770000  | 1.014220000  |
| 1  | -0.875114000 | 1.256219000  | 2.280646000  |
| 6  | 2.219537000  | 2.004456000  | -0.793629000 |
| 6  | 2.962265000  | 1.441409000  | -1.993469000 |
| 1  | 2.899637000  | 2.277324000  | 0.010583000  |
| 1  | 3.537062000  | 0.549774000  | -1.728784000 |
| 1  | 3.671625000  | 2.194712000  | -2.363594000 |
| 6  | 1.134823000  | 2.955730000  | -0.961027000 |
| 6  | 0.063906000  | 2.555420000  | -1.809929000 |
| 1  | 0.236352000  | 1.825052000  | -2.595295000 |

|   |              |              |              |
|---|--------------|--------------|--------------|
| 6 | 0.975764000  | 4.131658000  | -0.169449000 |
| 1 | 1.791623000  | 4.441241000  | 0.478282000  |
| 6 | -0.175019000 | 4.885600000  | -0.256493000 |
| 6 | -1.109298000 | 3.348667000  | -1.879116000 |
| 6 | -1.233812000 | 4.487706000  | -1.108782000 |
| 1 | -1.898559000 | 3.076639000  | -2.574821000 |
| 1 | -0.269145000 | 5.798622000  | 0.324457000  |
| 1 | -2.127414000 | 5.100950000  | -1.177196000 |
| 6 | -3.325793000 | 0.141669000  | 1.542026000  |
| 1 | -2.692782000 | -0.409236000 | 2.249171000  |
| 6 | -3.882042000 | -0.855478000 | 0.530749000  |
| 6 | -4.754930000 | -0.450009000 | -0.490238000 |
| 1 | -5.049714000 | 0.593624000  | -0.572160000 |
| 6 | -3.545517000 | -2.212781000 | 0.616542000  |
| 1 | -2.891006000 | -2.552192000 | 1.416958000  |
| 6 | -4.057853000 | -3.141334000 | -0.293806000 |
| 6 | -5.266829000 | -1.372943000 | -1.403051000 |
| 6 | -4.917955000 | -2.722784000 | -1.309763000 |
| 1 | -5.946520000 | -1.039430000 | -2.182417000 |
| 1 | -3.793511000 | -4.191262000 | -0.200706000 |
| 1 | -5.323288000 | -3.442169000 | -2.015427000 |
| 6 | -4.460966000 | 0.806105000  | 2.363889000  |
| 1 | -4.045570000 | 1.459285000  | 3.137872000  |
| 1 | -5.115335000 | 1.410166000  | 1.726671000  |
| 1 | -5.075475000 | 0.038047000  | 2.844119000  |

**S48**

E + ZPE = -3168.566579

|    |              |              |              |
|----|--------------|--------------|--------------|
| 28 | -0.492234000 | -0.622556000 | 0.101945000  |
| 15 | 1.544689000  | -0.285041000 | 0.913416000  |
| 6  | 1.683747000  | 1.224588000  | 2.022304000  |
| 1  | 1.871505000  | 2.100601000  | 1.396784000  |
| 6  | 2.863733000  | 0.951426000  | 3.008598000  |
| 1  | 3.653465000  | 1.699759000  | 2.887921000  |
| 1  | 2.488296000  | 1.062497000  | 4.031671000  |
| 6  | 3.427479000  | -0.471018000 | 2.811749000  |
| 1  | 3.803259000  | -0.885154000 | 3.754418000  |
| 1  | 4.274644000  | -0.455866000 | 2.116518000  |
| 6  | 2.328904000  | -1.385567000 | 2.235860000  |
| 1  | 1.543291000  | -1.507702000 | 2.993187000  |
| 6  | 2.863782000  | -2.763909000 | 1.844832000  |
| 1  | 3.615179000  | -2.693490000 | 1.051598000  |
| 1  | 2.078493000  | -3.453007000 | 1.518857000  |
| 1  | 3.348924000  | -3.221782000 | 2.714256000  |
| 6  | 0.365817000  | 1.464217000  | 2.781674000  |
| 1  | 0.088381000  | 0.600044000  | 3.396813000  |
| 1  | -0.462384000 | 1.696707000  | 2.107715000  |
| 1  | 0.490930000  | 2.316475000  | 3.458954000  |
| 6  | 2.872106000  | -0.177132000 | -0.373514000 |
| 6  | 3.782516000  | 0.891285000  | -0.354008000 |
| 1  | 3.700036000  | 1.667687000  | 0.398088000  |
| 6  | 4.819090000  | 0.982704000  | -1.285245000 |
| 1  | 5.508811000  | 1.820476000  | -1.242257000 |
| 6  | 4.970064000  | -0.007763000 | -2.251065000 |
| 1  | 5.780101000  | 0.043740000  | -2.972327000 |
| 6  | 4.074182000  | -1.076582000 | -2.279984000 |
| 1  | 4.202437000  | -1.859953000 | -3.022889000 |
| 6  | 3.015895000  | -1.178157000 | -1.368083000 |
| 6  | 2.059700000  | -2.350194000 | -1.513730000 |
| 1  | 1.689887000  | -2.687444000 | -0.544402000 |
| 1  | 2.584682000  | -3.197766000 | -1.977073000 |
| 8  | 0.885077000  | -2.044149000 | -2.267416000 |

|   |              |              |              |
|---|--------------|--------------|--------------|
| 6 | 1.085851000  | -2.022452000 | -3.677243000 |
| 1 | 1.495164000  | -2.979781000 | -4.029748000 |
| 1 | 0.105205000  | -1.868744000 | -4.133376000 |
| 1 | 1.756375000  | -1.210108000 | -3.986099000 |
| 6 | -3.203486000 | -1.392617000 | 1.384825000  |
| 6 | -0.761476000 | -2.086996000 | 1.518209000  |
| 6 | -1.936846000 | -2.005561000 | 0.802033000  |
| 1 | -2.079995000 | -2.709030000 | -0.019260000 |
| 1 | -1.813558000 | -0.669181000 | -0.899475000 |
| 1 | -2.902429000 | -0.607158000 | 2.090692000  |
| 1 | -0.714533000 | -1.664513000 | 2.519527000  |
| 1 | -0.046701000 | -2.877709000 | 1.310204000  |
| 6 | -0.178324000 | 0.818499000  | -1.169137000 |
| 6 | -1.397700000 | 0.121372000  | -1.649684000 |
| 1 | 0.703639000  | 0.595635000  | -1.764280000 |
| 1 | -1.229768000 | -0.480817000 | -2.541724000 |
| 1 | -2.277127000 | 0.758583000  | -1.748147000 |
| 6 | -0.263837000 | 2.245145000  | -0.776693000 |
| 6 | -1.406067000 | 2.798359000  | -0.166283000 |
| 1 | -2.273513000 | 2.173184000  | 0.031936000  |
| 6 | 0.826708000  | 3.096387000  | -1.034371000 |
| 1 | 1.708503000  | 2.693680000  | -1.526178000 |
| 6 | 0.779466000  | 4.448456000  | -0.697476000 |
| 6 | -1.452130000 | 4.148880000  | 0.172907000  |
| 6 | -0.359186000 | 4.979530000  | -0.088193000 |
| 1 | -2.345577000 | 4.556997000  | 0.637003000  |
| 1 | 1.626937000  | 5.090276000  | -0.921424000 |
| 1 | -0.400044000 | 6.033419000  | 0.170612000  |
| 6 | -3.940280000 | -2.487609000 | 2.198425000  |
| 1 | -4.842108000 | -2.069184000 | 2.655942000  |
| 1 | -4.245864000 | -3.319605000 | 1.554932000  |
| 1 | -3.297475000 | -2.885445000 | 2.990391000  |
| 6 | -4.133448000 | -0.765108000 | 0.354643000  |
| 6 | -4.591500000 | 0.547609000  | 0.528640000  |
| 1 | -4.278001000 | 1.111104000  | 1.405464000  |
| 6 | -4.578803000 | -1.483693000 | -0.765075000 |
| 1 | -4.264893000 | -2.514541000 | -0.913725000 |
| 6 | -5.440551000 | -0.897886000 | -1.693830000 |
| 6 | -5.457743000 | 1.135979000  | -0.396589000 |
| 6 | -5.880351000 | 0.415603000  | -1.514459000 |
| 1 | -5.805647000 | 2.153151000  | -0.239547000 |
| 1 | -5.776087000 | -1.471571000 | -2.553272000 |
| 1 | -6.554713000 | 0.869138000  | -2.234872000 |

**S49**

E + ZPE = -3168.560794

|    |              |              |              |
|----|--------------|--------------|--------------|
| 28 | -0.432671000 | -1.060384000 | -0.237742000 |
| 15 | -0.995165000 | 0.716618000  | 0.901581000  |
| 6  | -2.513536000 | 0.399838000  | 1.960758000  |
| 1  | -3.414491000 | 0.498165000  | 1.348996000  |
| 6  | -2.475112000 | 1.460338000  | 3.099008000  |
| 1  | -3.189278000 | 2.264825000  | 2.901230000  |
| 1  | -2.797940000 | 0.984113000  | 4.030715000  |
| 6  | -1.048552000 | 2.047937000  | 3.246906000  |
| 1  | -0.737003000 | 2.089244000  | 4.296470000  |
| 1  | -1.029254000 | 3.078851000  | 2.876041000  |
| 6  | -0.017766000 | 1.226978000  | 2.438061000  |
| 1  | 0.164305000  | 0.270450000  | 2.948146000  |
| 6  | 1.311531000  | 1.974908000  | 2.312691000  |
| 1  | 1.187348000  | 2.922673000  | 1.779264000  |
| 1  | 2.096902000  | 1.396356000  | 1.817632000  |
| 1  | 1.677163000  | 2.214140000  | 3.317867000  |

|   |              |              |              |
|---|--------------|--------------|--------------|
| 6 | -2.489694000 | -1.030432000 | 2.534220000  |
| 1 | -1.601904000 | -1.209405000 | 3.151331000  |
| 1 | -2.532815000 | -1.795476000 | 1.755754000  |
| 1 | -3.362673000 | -1.168265000 | 3.181887000  |
| 6 | -1.304840000 | 2.280530000  | -0.039957000 |
| 6 | -2.577219000 | 2.874810000  | 0.009841000  |
| 1 | -3.375430000 | 2.413549000  | 0.579164000  |
| 6 | -2.851704000 | 4.071454000  | -0.652600000 |
| 1 | -3.846089000 | 4.503898000  | -0.593491000 |
| 6 | -1.842073000 | 4.713660000  | -1.363462000 |
| 1 | -2.033184000 | 5.659788000  | -1.860845000 |
| 6 | -0.576008000 | 4.133710000  | -1.425610000 |
| 1 | 0.216985000  | 4.646432000  | -1.963394000 |
| 6 | -0.289190000 | 2.910764000  | -0.803505000 |
| 6 | 1.096760000  | 2.321655000  | -1.006959000 |
| 1 | 1.343332000  | 1.607779000  | -0.222245000 |
| 1 | 1.849199000  | 3.123628000  | -0.973405000 |
| 8 | 1.245013000  | 1.581512000  | -2.218903000 |
| 6 | 1.424423000  | 2.364967000  | -3.393798000 |
| 1 | 2.250728000  | 3.079723000  | -3.269187000 |
| 1 | 1.675115000  | 1.668217000  | -4.196894000 |
| 1 | 0.514577000  | 2.912894000  | -3.669423000 |
| 6 | 2.592902000  | -1.432821000 | -0.631255000 |
| 1 | 2.341511000  | -0.654754000 | -1.365009000 |
| 6 | 0.692928000  | -2.437265000 | 0.833384000  |
| 6 | 1.532206000  | -1.409628000 | 0.469157000  |
| 1 | 1.682256000  | -0.609984000 | 1.189193000  |
| 1 | 0.225815000  | -1.662468000 | -2.149518000 |
| 1 | 0.699452000  | -3.383610000 | 0.298923000  |
| 1 | 0.235275000  | -2.461092000 | 1.819501000  |
| 6 | -1.679471000 | -0.742215000 | -1.635447000 |
| 6 | -0.581766000 | -1.058929000 | -2.622907000 |
| 1 | -2.174307000 | 0.214339000  | -1.783005000 |
| 1 | -0.112847000 | -0.152709000 | -3.000903000 |
| 1 | -0.936411000 | -1.689454000 | -3.448152000 |
| 6 | -2.548098000 | -1.842492000 | -1.196098000 |
| 6 | -2.078738000 | -3.177767000 | -1.179880000 |
| 1 | -1.134301000 | -3.435995000 | -1.648639000 |
| 6 | -3.856028000 | -1.592950000 | -0.715033000 |
| 1 | -4.249020000 | -0.580436000 | -0.762711000 |
| 6 | -4.645882000 | -2.622355000 | -0.227447000 |
| 6 | -2.871995000 | -4.208022000 | -0.662883000 |
| 6 | -4.149423000 | -3.935131000 | -0.182841000 |
| 1 | -2.497435000 | -5.227435000 | -0.667383000 |
| 1 | -5.656374000 | -2.414504000 | 0.112590000  |
| 1 | -4.772103000 | -4.738346000 | 0.199417000  |
| 6 | 3.931444000  | -1.022707000 | -0.016400000 |
| 6 | 4.615713000  | 0.097841000  | -0.503512000 |
| 1 | 4.183090000  | 0.675266000  | -1.317899000 |
| 6 | 4.502408000  | -1.758647000 | 1.031979000  |
| 1 | 3.984648000  | -2.630027000 | 1.426397000  |
| 6 | 5.733252000  | -1.387256000 | 1.572614000  |
| 6 | 5.848697000  | 0.470891000  | 0.035859000  |
| 6 | 6.410592000  | -0.271549000 | 1.074900000  |
| 1 | 6.370599000  | 1.338331000  | -0.358760000 |
| 1 | 6.165105000  | -1.970184000 | 2.381344000  |
| 1 | 7.370710000  | 0.015194000  | 1.494087000  |
| 6 | 2.711321000  | -2.777353000 | -1.371546000 |
| 1 | 1.780476000  | -3.067962000 | -1.874044000 |
| 1 | 3.487614000  | -2.707641000 | -2.138606000 |
| 1 | 2.990326000  | -3.585280000 | -0.687621000 |

**S50**

E + ZPE = -3168.576547

|    |              |              |              |
|----|--------------|--------------|--------------|
| 28 | -0.075375000 | 1.080736000  | -0.121692000 |
| 15 | 1.840012000  | 0.203895000  | 0.647658000  |
| 6  | 3.234571000  | 1.447691000  | 0.919869000  |
| 1  | 4.155391000  | 0.850507000  | 0.922376000  |
| 6  | 3.002303000  | 1.897378000  | 2.373278000  |
| 1  | 3.854146000  | 2.492055000  | 2.722287000  |
| 1  | 2.120717000  | 2.549763000  | 2.435838000  |
| 6  | 2.822592000  | 0.628989000  | 3.207071000  |
| 1  | 2.457827000  | 0.843876000  | 4.217281000  |
| 1  | 3.798555000  | 0.140345000  | 3.319818000  |
| 6  | 1.856442000  | -0.348716000 | 2.483921000  |
| 1  | 0.844028000  | -0.175046000 | 2.861157000  |
| 6  | 2.234943000  | -1.808279000 | 2.767102000  |
| 1  | 3.217157000  | -2.055944000 | 2.352689000  |
| 1  | 1.512180000  | -2.527918000 | 2.375262000  |
| 1  | 2.284650000  | -1.955081000 | 3.852575000  |
| 6  | 3.407509000  | 2.611637000  | -0.054743000 |
| 1  | 2.509358000  | 3.235938000  | -0.099643000 |
| 1  | 3.653545000  | 2.280650000  | -1.068503000 |
| 1  | 4.232538000  | 3.247146000  | 0.287253000  |
| 6  | 2.515463000  | -1.190728000 | -0.349883000 |
| 6  | 3.802105000  | -1.112319000 | -0.903632000 |
| 1  | 4.411385000  | -0.226380000 | -0.763736000 |
| 6  | 4.336132000  | -2.166328000 | -1.648083000 |
| 1  | 5.335510000  | -2.078571000 | -2.063748000 |
| 6  | 3.590685000  | -3.325705000 | -1.839883000 |
| 1  | 4.002212000  | -4.158517000 | -2.402172000 |
| 6  | 2.304349000  | -3.409866000 | -1.304763000 |
| 1  | 1.721532000  | -4.315889000 | -1.451557000 |
| 6  | 1.741223000  | -2.354767000 | -0.578956000 |
| 6  | 0.300886000  | -2.476156000 | -0.118545000 |
| 1  | 0.143037000  | -1.992188000 | 0.847719000  |
| 1  | 0.031486000  | -3.534779000 | 0.001512000  |
| 8  | -0.616036000 | -1.838932000 | -1.004002000 |
| 6  | -0.979721000 | -2.632237000 | -2.127774000 |
| 1  | -1.399532000 | -3.593085000 | -1.801970000 |
| 1  | -1.752401000 | -2.080485000 | -2.666282000 |
| 1  | -0.129063000 | -2.812032000 | -2.798295000 |
| 6  | -0.877505000 | 1.910853000  | 1.586603000  |
| 6  | -1.449337000 | 0.662612000  | 1.568613000  |
| 1  | -0.934937000 | -0.153109000 | 2.071860000  |
| 1  | -0.320770000 | -0.079462000 | -3.077964000 |
| 1  | -1.464305000 | 2.785106000  | 1.310705000  |
| 1  | 0.012802000  | 2.110926000  | 2.177437000  |
| 6  | 0.742342000  | 1.420803000  | -1.888274000 |
| 6  | 0.679006000  | 0.337533000  | -2.949592000 |
| 1  | 1.722641000  | 1.890480000  | -1.857215000 |
| 1  | 1.361944000  | -0.485387000 | -2.729748000 |
| 1  | 0.982740000  | 0.773504000  | -3.911473000 |
| 6  | -0.348009000 | 2.366371000  | -1.739961000 |
| 6  | -1.656015000 | 1.836045000  | -1.567395000 |
| 1  | -1.865140000 | 0.800417000  | -1.825999000 |
| 6  | -0.157836000 | 3.768457000  | -1.548732000 |
| 1  | 0.840911000  | 4.180877000  | -1.660179000 |
| 6  | -1.230318000 | 4.596882000  | -1.293893000 |
| 6  | -2.744577000 | 2.708260000  | -1.338165000 |
| 6  | -2.537718000 | 4.067112000  | -1.195495000 |
| 1  | -3.753321000 | 2.308400000  | -1.301054000 |
| 1  | -1.075510000 | 5.667275000  | -1.192841000 |
| 1  | -3.378166000 | 4.734878000  | -1.031253000 |
| 6  | -2.933478000 | 0.421909000  | 1.350858000  |
| 1  | -3.305391000 | 1.166411000  | 0.642603000  |

|   |              |              |              |
|---|--------------|--------------|--------------|
| 6 | -3.297902000 | -0.962294000 | 0.830823000  |
| 6 | -2.937406000 | -2.123525000 | 1.529490000  |
| 1 | -2.358134000 | -2.049710000 | 2.447563000  |
| 6 | -4.082016000 | -1.099136000 | -0.320936000 |
| 1 | -4.398559000 | -0.210522000 | -0.863613000 |
| 6 | -4.490143000 | -2.356893000 | -0.770863000 |
| 6 | -3.337811000 | -3.382947000 | 1.082739000  |
| 6 | -4.116052000 | -3.504476000 | -0.071060000 |
| 1 | -3.058519000 | -4.269175000 | 1.646420000  |
| 1 | -5.109373000 | -2.437395000 | -1.660193000 |
| 1 | -4.441457000 | -4.483627000 | -0.410916000 |
| 6 | -3.649285000 | 0.693722000  | 2.703250000  |
| 1 | -3.295532000 | 0.015789000  | 3.487234000  |
| 1 | -3.473190000 | 1.721737000  | 3.035783000  |
| 1 | -4.726923000 | 0.539377000  | 2.589570000  |

S51

E + ZPE = -3168.563098

|    |              |              |              |
|----|--------------|--------------|--------------|
| 28 | 0.441837000  | 0.868932000  | -0.356181000 |
| 15 | 2.015215000  | -0.085573000 | 0.841804000  |
| 6  | 3.230512000  | 0.878885000  | 1.882660000  |
| 1  | 4.010805000  | 0.160014000  | 2.170214000  |
| 6  | 2.367016000  | 1.167767000  | 3.126055000  |
| 1  | 2.983967000  | 1.583225000  | 3.930484000  |
| 1  | 1.626366000  | 1.939264000  | 2.875881000  |
| 6  | 1.680876000  | -0.140280000 | 3.566927000  |
| 1  | 0.760933000  | 0.065838000  | 4.123223000  |
| 1  | 2.343959000  | -0.679529000 | 4.252131000  |
| 6  | 1.393248000  | -1.067063000 | 2.338500000  |
| 1  | 0.314580000  | -1.202000000 | 2.211280000  |
| 6  | 2.041528000  | -2.448373000 | 2.522227000  |
| 1  | 3.129720000  | -2.373020000 | 2.622595000  |
| 1  | 1.833526000  | -3.132247000 | 1.695395000  |
| 1  | 1.655887000  | -2.907725000 | 3.439877000  |
| 6  | 3.892425000  | 2.128920000  | 1.301116000  |
| 1  | 3.159888000  | 2.924886000  | 1.134551000  |
| 1  | 4.408046000  | 1.935728000  | 0.355058000  |
| 1  | 4.634923000  | 2.512691000  | 2.009853000  |
| 6  | 2.926044000  | -1.231764000 | -0.258439000 |
| 6  | 4.317063000  | -1.136511000 | -0.401069000 |
| 1  | 4.879807000  | -0.429788000 | 0.199401000  |
| 6  | 5.007390000  | -1.941905000 | -1.309563000 |
| 1  | 6.086123000  | -1.853981000 | -1.397809000 |
| 6  | 4.306243000  | -2.850226000 | -2.096936000 |
| 1  | 4.829248000  | -3.478609000 | -2.811357000 |
| 6  | 2.919945000  | -2.949482000 | -1.966781000 |
| 1  | 2.378008000  | -3.663496000 | -2.581528000 |
| 6  | 2.211265000  | -2.154977000 | -1.059191000 |
| 6  | 0.723379000  | -2.396265000 | -0.931544000 |
| 1  | 0.461077000  | -2.780526000 | 0.064682000  |
| 1  | 0.433674000  | -3.163766000 | -1.657823000 |
| 8  | -0.078315000 | -1.220782000 | -1.180485000 |
| 6  | -1.421107000 | -1.603453000 | -1.522544000 |
| 1  | -1.879115000 | -2.195501000 | -0.722772000 |
| 1  | -1.997131000 | -0.690895000 | -1.658682000 |
| 1  | -1.418519000 | -2.183060000 | -2.453952000 |
| 6  | -1.265061000 | 1.315547000  | 1.521885000  |
| 6  | -2.209929000 | 0.363894000  | 1.638485000  |
| 1  | -1.965479000 | -0.554143000 | 2.175245000  |
| 1  | 1.592325000  | 0.810597000  | -3.185812000 |
| 1  | -1.499134000 | 2.286434000  | 1.093348000  |
| 1  | -0.341562000 | 1.236380000  | 2.084975000  |

|   |              |              |              |
|---|--------------|--------------|--------------|
| 6 | 1.615743000  | 2.023533000  | -1.354257000 |
| 6 | 2.275724000  | 1.409278000  | -2.577087000 |
| 1 | 2.317509000  | 2.622095000  | -0.776734000 |
| 1 | 3.116828000  | 0.767823000  | -2.299862000 |
| 1 | 2.668706000  | 2.212688000  | -3.215634000 |
| 6 | 0.295588000  | 2.625044000  | -1.436318000 |
| 6 | -0.743781000 | 1.805700000  | -1.959293000 |
| 1 | -0.503039000 | 0.976189000  | -2.618209000 |
| 6 | -0.051925000 | 3.874656000  | -0.842986000 |
| 1 | 0.738958000  | 4.500595000  | -0.438424000 |
| 6 | -1.361593000 | 4.304314000  | -0.830929000 |
| 6 | -2.082420000 | 2.269186000  | -1.930254000 |
| 6 | -2.389336000 | 3.494803000  | -1.372818000 |
| 1 | -2.864057000 | 1.670246000  | -2.388860000 |
| 1 | -1.608167000 | 5.277558000  | -0.416027000 |
| 1 | -3.413137000 | 3.857428000  | -1.375001000 |
| 6 | -3.649970000 | 0.508419000  | 1.205369000  |
| 1 | -3.706045000 | 1.349975000  | 0.505030000  |
| 6 | -4.208688000 | -0.729288000 | 0.511260000  |
| 6 | -4.166832000 | -1.994137000 | 1.117307000  |
| 1 | -3.726700000 | -2.111530000 | 2.104976000  |
| 6 | -4.817845000 | -0.615695000 | -0.744948000 |
| 1 | -4.883692000 | 0.360900000  | -1.220242000 |
| 6 | -5.357443000 | -1.732044000 | -1.388397000 |
| 6 | -4.703030000 | -3.112945000 | 0.477585000  |
| 6 | -5.296619000 | -2.986551000 | -0.780578000 |
| 1 | -4.666274000 | -4.082479000 | 0.966920000  |
| 1 | -5.831141000 | -1.618758000 | -2.359716000 |
| 1 | -5.718765000 | -3.856198000 | -1.275796000 |
| 6 | -4.504205000 | 0.875895000  | 2.448366000  |
| 1 | -4.461058000 | 0.087166000  | 3.207187000  |
| 1 | -4.148587000 | 1.806674000  | 2.901803000  |
| 1 | -5.551633000 | 1.003332000  | 2.157148000  |

S52

E + ZPE = -3168.568578

|    |              |              |              |
|----|--------------|--------------|--------------|
| 28 | 0.272148000  | -0.396901000 | -0.208040000 |
| 15 | -1.620102000 | 0.531094000  | 0.439515000  |
| 6  | -1.580188000 | 1.126440000  | 2.228997000  |
| 1  | -1.994704000 | 0.330559000  | 2.854854000  |
| 6  | -2.477153000 | 2.402166000  | 2.293974000  |
| 1  | -3.168557000 | 2.346870000  | 3.141314000  |
| 1  | -1.829059000 | 3.267248000  | 2.475577000  |
| 6  | -3.227179000 | 2.607321000  | 0.968777000  |
| 1  | -3.522241000 | 3.654965000  | 0.837676000  |
| 1  | -4.150007000 | 2.014799000  | 0.943683000  |
| 6  | -2.302888000 | 2.168204000  | -0.182513000 |
| 1  | -1.431428000 | 2.834346000  | -0.203908000 |
| 6  | -2.993813000 | 2.201409000  | -1.546229000 |
| 1  | -3.827985000 | 1.493737000  | -1.595135000 |
| 1  | -2.309492000 | 1.988384000  | -2.373484000 |
| 1  | -3.403763000 | 3.202869000  | -1.719833000 |
| 6  | -0.154809000 | 1.426462000  | 2.721276000  |
| 1  | 0.342918000  | 2.168667000  | 2.088578000  |
| 1  | 0.476986000  | 0.533709000  | 2.753190000  |
| 1  | -0.201714000 | 1.833308000  | 3.737977000  |
| 6  | -3.057249000 | -0.631999000 | 0.266827000  |
| 6  | -3.957280000 | -0.809947000 | 1.328548000  |
| 1  | -3.819477000 | -0.277011000 | 2.262421000  |
| 6  | -5.058349000 | -1.662470000 | 1.218524000  |
| 1  | -5.736285000 | -1.775283000 | 2.059324000  |
| 6  | -5.282792000 | -2.352451000 | 0.031974000  |

|   |              |              |              |
|---|--------------|--------------|--------------|
| 1 | -6.138133000 | -3.013554000 | -0.069425000 |
| 6 | -4.398165000 | -2.183129000 | -1.033763000 |
| 1 | -4.579037000 | -2.711942000 | -1.966435000 |
| 6 | -3.283622000 | -1.341327000 | -0.941460000 |
| 6 | -2.364266000 | -1.241490000 | -2.146478000 |
| 1 | -2.054171000 | -0.211154000 | -2.325829000 |
| 1 | -2.896520000 | -1.585652000 | -3.043854000 |
| 8 | -1.142868000 | -1.974930000 | -2.006009000 |
| 6 | -1.294033000 | -3.382363000 | -2.172306000 |
| 1 | -1.718261000 | -3.616048000 | -3.158435000 |
| 1 | -0.294527000 | -3.817880000 | -2.105845000 |
| 1 | -1.933234000 | -3.821853000 | -1.395623000 |
| 6 | 2.307510000  | -1.989964000 | -1.551982000 |
| 6 | -0.209011000 | -1.892834000 | 1.176755000  |
| 6 | 1.055282000  | -2.160822000 | 0.702967000  |
| 1 | 1.141775000  | -2.860104000 | -0.129326000 |
| 1 | 1.676837000  | -0.893835000 | -0.962339000 |
| 1 | 2.132992000  | -1.160418000 | 2.249314000  |
| 1 | -1.072833000 | -2.398448000 | 0.759590000  |
| 1 | -0.332077000 | -1.501042000 | 2.183549000  |
| 6 | 0.640246000  | 0.999360000  | -1.487673000 |
| 6 | 1.616592000  | -0.084112000 | -1.794964000 |
| 1 | -0.148770000 | 1.084404000  | -2.233759000 |
| 1 | 2.657538000  | 0.243190000  | -1.795074000 |
| 1 | 1.368542000  | -0.661889000 | -2.685686000 |
| 6 | 1.164483000  | 2.321665000  | -1.057984000 |
| 6 | 0.630170000  | 3.500862000  | -1.607070000 |
| 1 | -0.158299000 | 3.431889000  | -2.352751000 |
| 6 | 2.209506000  | 2.443289000  | -0.122317000 |
| 1 | 2.662711000  | 1.551726000  | 0.304104000  |
| 6 | 2.695045000  | 3.695403000  | 0.249667000  |
| 6 | 1.118661000  | 4.754381000  | -1.238879000 |
| 6 | 2.149811000  | 4.856871000  | -0.304054000 |
| 1 | 0.699161000  | 5.649444000  | -1.689247000 |
| 1 | 3.505491000  | 3.765675000  | 0.969783000  |
| 1 | 2.533250000  | 5.831426000  | -0.016871000 |
| 6 | 2.495676000  | -3.274184000 | 2.399996000  |
| 1 | 3.377614000  | -3.173176000 | 3.039987000  |
| 1 | 1.620964000  | -3.456087000 | 3.032753000  |
| 1 | 2.643924000  | -4.151653000 | 1.761395000  |
| 6 | 3.567959000  | -1.674804000 | 0.757233000  |
| 6 | 3.989094000  | -2.490243000 | -0.304233000 |
| 1 | 3.414884000  | -3.373069000 | -0.577572000 |
| 6 | 4.357795000  | -0.569960000 | 1.101000000  |
| 1 | 4.061664000  | 0.058341000  | 1.938884000  |
| 6 | 5.527554000  | -0.274471000 | 0.396354000  |
| 6 | 5.155017000  | -2.196379000 | -1.012992000 |
| 6 | 5.926695000  | -1.084723000 | -0.666979000 |
| 1 | 5.465689000  | -2.841687000 | -1.829940000 |
| 1 | 6.127830000  | 0.584538000  | 0.682773000  |
| 1 | 6.836342000  | -0.859028000 | -1.215634000 |

S53

E + ZPE = -3168.559669

|    |              |             |              |
|----|--------------|-------------|--------------|
| 28 | -0.084919000 | 0.179709000 | 0.757024000  |
| 15 | 1.641824000  | 0.512314000 | -0.555779000 |
| 6  | 1.210541000  | 0.983073000 | -2.326116000 |
| 1  | 1.013531000  | 0.070975000 | -2.897068000 |
| 6  | 2.444614000  | 1.752187000 | -2.897979000 |
| 1  | 2.895070000  | 1.200878000 | -3.729230000 |
| 1  | 2.093346000  | 2.702799000 | -3.313365000 |
| 6  | 3.491548000  | 2.012362000 | -1.793055000 |

|   |              |              |              |                        |              |              |              |
|---|--------------|--------------|--------------|------------------------|--------------|--------------|--------------|
| 1 | 3.998373000  | 2.972677000  | -1.941697000 | 6                      | -5.385398000 | -3.333307000 | -0.145280000 |
| 1 | 4.269630000  | 1.240699000  | -1.816615000 | 6                      | -6.498688000 | -2.493463000 | -0.219699000 |
| 6 | 2.812357000  | 1.979875000  | -0.410032000 | 1                      | -5.511940000 | -4.385361000 | 0.094479000  |
| 1 | 2.132650000  | 2.838620000  | -0.323003000 | 1                      | -7.187254000 | -0.484280000 | -0.591735000 |
| 6 | 3.825321000  | 2.024255000  | 0.734923000  | 1                      | -7.493698000 | -2.889289000 | -0.038210000 |
| 1 | 4.496559000  | 1.159471000  | 0.709168000  | .....                  |              |              |              |
| 1 | 3.356236000  | 2.068398000  | 1.722842000  | <b>S54</b>             |              |              |              |
| 1 | 4.446789000  | 2.921283000  | 0.633443000  | E + ZPE = -3168.571392 |              |              |              |
| 6 | -0.056262000 | 1.855246000  | -2.372040000 | 28                     | 0.008157000  | -0.799548000 | 0.369104000  |
| 1 | 0.055073000  | 2.767425000  | -1.777839000 | 15                     | -1.947439000 | -0.435093000 | -0.603970000 |
| 1 | -0.941840000 | 1.328558000  | -2.007694000 | 6                      | -1.737446000 | -0.678751000 | -2.459236000 |
| 1 | -0.249730000 | 2.155394000  | -3.408078000 | 1                      | -1.266972000 | 0.212855000  | -2.886198000 |
| 6 | 2.754035000  | -0.971701000 | -0.649655000 | 6                      | -3.158640000 | -0.918264000 | -3.050630000 |
| 6 | 3.079711000  | -1.512576000 | -1.905077000 | 1                      | -3.474643000 | -0.068499000 | -3.663290000 |
| 1 | 2.670048000  | -1.083381000 | -2.811534000 | 1                      | -3.113176000 | -1.780132000 | -3.724787000 |
| 6 | 3.944500000  | -2.600370000 | -2.032223000 | 6                      | -4.181361000 | -1.172346000 | -1.919842000 |
| 1 | 4.173692000  | -2.992371000 | -3.018677000 | 1                      | -4.894500000 | -1.957632000 | -2.194321000 |
| 6 | 4.521672000  | -3.159984000 | -0.896558000 | 1                      | -4.771747000 | -0.267510000 | -1.735862000 |
| 1 | 5.212578000  | -3.993354000 | -0.981349000 | 6                      | -3.466852000 | -1.560670000 | -0.605884000 |
| 6 | 4.212136000  | -2.631633000 | 0.355823000  | 1                      | -3.055471000 | -2.573909000 | -0.703835000 |
| 1 | 4.681678000  | -3.052545000 | 1.241121000  | 6                      | -4.442672000 | -1.527524000 | 0.572376000  |
| 6 | 3.321667000  | -1.560740000 | 0.509988000  | 1                      | -4.828464000 | -0.517092000 | 0.743093000  |
| 6 | 3.005549000  | -1.109039000 | 1.925989000  | 1                      | -4.008817000 | -1.896335000 | 1.503881000  |
| 1 | 2.714468000  | -0.058750000 | 1.949851000  | 1                      | -5.301284000 | -2.168946000 | 0.343125000  |
| 1 | 3.900278000  | -1.219778000 | 2.555962000  | 6                      | -0.823405000 | -1.887761000 | -2.738817000 |
| 8 | 1.911296000  | -1.804006000 | 2.527857000  | 1                      | -1.240257000 | -2.810568000 | -2.319298000 |
| 6 | 2.227895000  | -3.097951000 | 3.030733000  | 1                      | 0.184368000  | -1.761469000 | -2.333430000 |
| 1 | 3.077846000  | -3.052269000 | 3.726672000  | 1                      | -0.734432000 | -2.032852000 | -3.821199000 |
| 1 | 1.344946000  | -3.447427000 | 3.570438000  | 6                      | -2.663829000 | 1.253779000  | -0.340276000 |
| 1 | 2.460541000  | -3.808021000 | 2.226737000  | 6                      | -2.939052000 | 2.079999000  | -1.440861000 |
| 6 | 0.181200000  | 1.665268000  | 1.908307000  | 1                      | -2.726878000 | 1.741209000  | -2.448459000 |
| 6 | -0.252473000 | 0.663627000  | 2.943827000  | 6                      | -3.497412000 | 3.349282000  | -1.277773000 |
| 1 | -1.075359000 | 1.013158000  | 3.575049000  | 1                      | -3.700408000 | 3.963700000  | -2.149911000 |
| 1 | -0.668554000 | -0.270192000 | 2.462382000  | 6                      | -3.802638000 | 3.811775000  | -0.001217000 |
| 1 | 1.164520000  | 2.098673000  | 2.066864000  | 1                      | -4.251084000 | 4.790808000  | 0.138289000  |
| 6 | -0.386494000 | -1.834265000 | 0.154997000  | 6                      | -3.531244000 | 3.002495000  | 1.101937000  |
| 6 | -1.619610000 | -1.238620000 | 0.206654000  | 1                      | -3.781627000 | 3.356816000  | 2.098794000  |
| 1 | 0.079782000  | -2.074690000 | -0.795312000 | 6                      | -2.950761000 | 1.735629000  | 0.962429000  |
| 1 | 0.063115000  | -2.305150000 | 1.024426000  | 6                      | -2.628585000 | 0.951260000  | 2.222496000  |
| 1 | -2.146095000 | -1.248105000 | 1.162696000  | 1                      | -2.723542000 | -0.120898000 | 2.053820000  |
| 1 | 0.575360000  | 0.304332000  | 3.554333000  | 1                      | -3.333471000 | 1.224645000  | 3.020455000  |
| 6 | -0.819549000 | 2.604286000  | 1.366987000  | 8                      | -1.287109000 | 1.130606000  | 2.687042000  |
| 6 | -2.194844000 | 2.281965000  | 1.337608000  | 6                      | -1.077744000 | 2.325287000  | 3.434364000  |
| 1 | -2.556940000 | 1.371423000  | 1.806856000  | 1                      | -1.757931000 | 2.372726000  | 4.296550000  |
| 6 | -0.420331000 | 3.844765000  | 0.824262000  | 1                      | -0.047257000 | 2.293060000  | 3.794582000  |
| 1 | 0.626330000  | 4.134245000  | 0.878640000  | 1                      | -1.214667000 | 3.224978000  | 2.820225000  |
| 6 | -1.347711000 | 4.714558000  | 0.262898000  | 6                      | -0.611995000 | -2.470643000 | 1.105490000  |
| 6 | -3.121816000 | 3.151452000  | 0.761315000  | 6                      | -1.242255000 | -2.397477000 | 2.490963000  |
| 6 | -2.703022000 | 4.365805000  | 0.217614000  | 1                      | -0.954197000 | -3.279453000 | 3.077691000  |
| 1 | -4.175461000 | 2.887427000  | 0.759437000  | 1                      | -0.948343000 | -1.508859000 | 3.057658000  |
| 1 | -1.020454000 | 5.672937000  | -0.129918000 | 1                      | -1.151608000 | -3.141821000 | 0.436767000  |
| 1 | -3.427036000 | 5.048448000  | -0.216949000 | 6                      | 0.441001000  | 1.207875000  | -0.107416000 |
| 6 | -2.528222000 | -0.913443000 | -0.975559000 | 6                      | 1.670073000  | 0.626208000  | 0.062299000  |
| 1 | -2.638003000 | 0.177901000  | -1.037570000 | 1                      | 0.100271000  | 1.494485000  | -1.097845000 |
| 6 | -1.992908000 | -1.419646000 | -2.326300000 | 1                      | -0.064801000 | 1.684825000  | 0.725449000  |
| 1 | -1.909933000 | -2.511279000 | -2.331780000 | 1                      | 2.091327000  | 0.633773000  | 1.063053000  |
| 1 | -2.678859000 | -1.132974000 | -3.128417000 | 1                      | -2.331562000 | -2.396896000 | 2.425566000  |
| 1 | -1.008553000 | -1.001501000 | -2.561078000 | 6                      | 0.830340000  | -2.624168000 | 0.998469000  |
| 6 | -3.923004000 | -1.470798000 | -0.692240000 | 6                      | 1.657443000  | -1.824996000 | 1.828227000  |
| 6 | -4.107652000 | -2.825426000 | -0.379414000 | 1                      | 1.223543000  | -1.269653000 | 2.654709000  |
| 1 | -3.248371000 | -3.489824000 | -0.320242000 | 6                      | 1.455871000  | -3.449577000 | 0.015278000  |
| 6 | -5.046017000 | -0.637607000 | -0.761156000 | 1                      | 0.829656000  | -4.052204000 | -0.636901000 |
| 1 | -4.919410000 | 0.414760000  | -1.007614000 |                        |              |              |              |
| 6 | -6.326232000 | -1.143897000 | -0.529420000 |                        |              |              |              |

|   |             |              |              |
|---|-------------|--------------|--------------|
| 6 | 2.830369000 | -3.529616000 | -0.062639000 |
| 6 | 3.059834000 | -1.917365000 | 1.735878000  |
| 6 | 3.639870000 | -2.764366000 | 0.807326000  |
| 1 | 3.682659000 | -1.335786000 | 2.408737000  |
| 1 | 3.295176000 | -4.195596000 | -0.783815000 |
| 1 | 4.720809000 | -2.854007000 | 0.753712000  |
| 6 | 2.691003000 | 0.346177000  | -1.030676000 |
| 1 | 2.963329000 | -0.716279000 | -0.985592000 |
| 6 | 2.198787000 | 0.653216000  | -2.456154000 |
| 1 | 1.979037000 | 1.718934000  | -2.579997000 |
| 1 | 2.977855000 | 0.393493000  | -3.178605000 |
| 1 | 1.300132000 | 0.083226000  | -2.714431000 |
| 6 | 3.967126000 | 1.134773000  | -0.723729000 |
| 6 | 3.920345000 | 2.511624000  | -0.463286000 |
| 1 | 2.962782000 | 3.027109000  | -0.449572000 |
| 6 | 5.213702000 | 0.497494000  | -0.736248000 |
| 1 | 5.268322000 | -0.569409000 | -0.941370000 |
| 6 | 6.387061000 | 1.215680000  | -0.499717000 |
| 6 | 5.090748000 | 3.231786000  | -0.223055000 |
| 6 | 6.328325000 | 2.585628000  | -0.240494000 |
| 1 | 5.036146000 | 4.298431000  | -0.023576000 |
| 1 | 7.345841000 | 0.704871000  | -0.518585000 |
| 1 | 7.239908000 | 3.146099000  | -0.054462000 |

S55

E + ZPE = -3168.567221

|    |              |              |              |
|----|--------------|--------------|--------------|
| 28 | -0.807349000 | 1.257633000  | -0.309957000 |
| 15 | -1.980901000 | -0.249684000 | 0.763319000  |
| 6  | -1.291395000 | -0.777186000 | 2.440873000  |
| 1  | -0.799645000 | -1.743380000 | 2.294679000  |
| 6  | -2.517290000 | -0.926848000 | 3.391120000  |
| 1  | -2.401108000 | -1.803775000 | 4.036897000  |
| 1  | -2.547202000 | -0.052608000 | 4.053199000  |
| 6  | -3.819147000 | -0.984392000 | 2.582311000  |
| 1  | -4.691253000 | -0.769263000 | 3.210966000  |
| 1  | -3.974896000 | -1.984672000 | 2.158633000  |
| 6  | -3.714790000 | 0.043387000  | 1.439441000  |
| 1  | -3.669659000 | 1.048492000  | 1.881481000  |
| 6  | -4.884417000 | -0.022436000 | 0.455830000  |
| 1  | -4.923915000 | -0.988511000 | -0.058019000 |
| 1  | -4.845322000 | 0.769375000  | -0.298635000 |
| 1  | -5.826801000 | 0.099147000  | 1.001556000  |
| 6  | -0.250711000 | 0.196926000  | 3.011596000  |
| 1  | -0.675741000 | 1.196511000  | 3.155469000  |
| 1  | 0.626479000  | 0.289562000  | 2.367118000  |
| 1  | 0.080991000  | -0.160063000 | 3.993721000  |
| 6  | -2.157977000 | -1.783814000 | -0.264500000 |
| 6  | -2.027624000 | -3.066349000 | 0.288084000  |
| 1  | -1.819318000 | -3.191928000 | 1.344634000  |
| 6  | -2.173398000 | -4.215359000 | -0.493635000 |
| 1  | -2.070919000 | -5.194017000 | -0.034258000 |
| 6  | -2.454085000 | -4.099499000 | -1.851367000 |
| 1  | -2.571381000 | -4.985434000 | -2.468019000 |
| 6  | -2.587105000 | -2.830439000 | -2.416742000 |
| 1  | -2.816638000 | -2.737968000 | -3.475509000 |
| 6  | -2.442161000 | -1.669740000 | -1.649889000 |
| 6  | -2.606706000 | -0.327477000 | -2.333984000 |
| 1  | -3.283743000 | 0.328364000  | -1.784057000 |
| 1  | -3.024449000 | -0.466585000 | -3.338326000 |
| 8  | -1.376262000 | 0.415418000  | -2.438041000 |
| 6  | -0.549253000 | -0.011852000 | -3.527276000 |
| 1  | -1.094309000 | 0.083829000  | -4.474136000 |

|   |              |              |              |
|---|--------------|--------------|--------------|
| 1 | 0.320333000  | 0.647438000  | -3.546715000 |
| 1 | -0.218835000 | -1.048921000 | -3.397151000 |
| 6 | -1.630586000 | 2.781611000  | 0.507897000  |
| 6 | -2.868798000 | 3.335891000  | -0.177279000 |
| 1 | -3.058190000 | 4.357995000  | 0.178423000  |
| 1 | -2.777723000 | 3.382995000  | -1.266464000 |
| 1 | -1.754917000 | 2.735805000  | 1.592347000  |
| 6 | 1.106589000  | -0.359130000 | -0.556891000 |
| 6 | 2.235493000  | -0.113297000 | 0.125255000  |
| 1 | 0.645872000  | -1.340070000 | -0.594752000 |
| 1 | 0.739019000  | 0.379895000  | -1.271962000 |
| 1 | 2.666540000  | 0.885026000  | 0.068713000  |
| 1 | -3.757711000 | 2.743785000  | 0.058522000  |
| 6 | -0.298985000 | 3.204843000  | 0.102131000  |
| 6 | 0.026870000  | 3.025497000  | -1.274941000 |
| 1 | -0.757468000 | 2.998094000  | -2.026667000 |
| 6 | 0.747140000  | 3.539242000  | 1.012053000  |
| 1 | 0.505516000  | 3.666785000  | 2.063596000  |
| 6 | 2.031062000  | 3.749846000  | 0.557080000  |
| 6 | 1.357897000  | 3.240851000  | -1.713422000 |
| 6 | 2.345481000  | 3.591391000  | -0.814053000 |
| 1 | 1.589693000  | 3.164766000  | -2.772134000 |
| 1 | 2.809230000  | 4.048521000  | 1.253774000  |
| 1 | 3.359272000  | 3.773843000  | -1.157928000 |
| 6 | 3.020040000  | -1.086689000 | 0.974361000  |
| 1 | 3.016994000  | -0.675275000 | 1.995875000  |
| 6 | 2.424611000  | -2.502641000 | 1.034924000  |
| 1 | 3.026572000  | -3.132928000 | 1.695673000  |
| 1 | 1.397790000  | -2.491669000 | 1.419233000  |
| 1 | 2.414474000  | -2.973498000 | 0.046133000  |
| 6 | 4.481132000  | -1.106891000 | 0.520219000  |
| 6 | 5.512942000  | -0.840895000 | 1.427793000  |
| 1 | 5.271666000  | -0.601826000 | 2.461465000  |
| 6 | 4.813945000  | -1.413310000 | -0.806649000 |
| 1 | 4.024855000  | -1.617714000 | -1.526795000 |
| 6 | 6.147305000  | -1.459044000 | -1.213600000 |
| 6 | 6.848509000  | -0.886328000 | 1.023618000  |
| 6 | 7.169036000  | -1.195655000 | -0.298683000 |
| 1 | 7.636807000  | -0.680809000 | 1.742479000  |
| 1 | 6.389031000  | -1.700497000 | -2.245096000 |
| 1 | 8.207650000  | -1.231916000 | -0.614693000 |

S56

E + ZPE = -3168.566496

|    |              |              |              |
|----|--------------|--------------|--------------|
| 28 | 0.325212000  | -0.131027000 | 0.007052000  |
| 15 | -1.771471000 | 0.472298000  | 0.329017000  |
| 6  | -2.061194000 | 1.292552000  | 2.007940000  |
| 1  | -2.454901000 | 0.534371000  | 2.690915000  |
| 6  | -3.119141000 | 2.414291000  | 1.776877000  |
| 1  | -3.875241000 | 2.399144000  | 2.568799000  |
| 1  | -2.611910000 | 3.383883000  | 1.845245000  |
| 6  | -3.753178000 | 2.279053000  | 0.385687000  |
| 1  | -4.205575000 | 3.223494000  | 0.061151000  |
| 1  | -4.554325000 | 1.529440000  | 0.388326000  |
| 6  | -2.647850000 | 1.852213000  | -0.598034000 |
| 1  | -1.902539000 | 2.656129000  | -0.643524000 |
| 6  | -3.173896000 | 1.571128000  | -2.006140000 |
| 1  | -3.873643000 | 0.728835000  | -2.016321000 |
| 1  | -2.374287000 | 1.364282000  | -2.724689000 |
| 1  | -3.715089000 | 2.450645000  | -2.373217000 |
| 6  | -0.772702000 | 1.859299000  | 2.626524000  |
| 1  | -0.272525000 | 2.559914000  | 1.950254000  |



|   |              |              |              |    |              |              |              |
|---|--------------|--------------|--------------|----|--------------|--------------|--------------|
| 1 | -0.054884000 | 1.079080000  | 2.898905000  | 28 | -0.054842000 | 0.750479000  | -0.752187000 |
| 1 | -1.022716000 | 2.403761000  | 3.544431000  | 15 | -1.384282000 | 0.237791000  | 0.902443000  |
| 6 | -2.932306000 | -0.970738000 | 0.192587000  | 6  | -0.441866000 | -0.283786000 | 2.451074000  |
| 6 | -3.909060000 | -1.189649000 | 1.176102000  | 1  | -0.211969000 | -1.350176000 | 2.374459000  |
| 1 | -3.986459000 | -0.529465000 | 2.032063000  | 6  | -1.393345000 | 0.000881000  | 3.658912000  |
| 6 | -4.817439000 | -2.246507000 | 1.083493000  | 1  | -1.640623000 | -0.926737000 | 4.184488000  |
| 1 | -5.560904000 | -2.385413000 | 1.862744000  | 1  | -0.854524000 | 0.628018000  | 4.377201000  |
| 6 | -4.770018000 | -3.104835000 | -0.009756000 | 6  | -2.678978000 | 0.720756000  | 3.197781000  |
| 1 | -5.475178000 | -3.925677000 | -0.099037000 | 1  | -3.041838000 | 1.416417000  | 3.962988000  |
| 6 | -3.809353000 | -2.895703000 | -0.999549000 | 1  | -3.483904000 | -0.003028000 | 3.025473000  |
| 1 | -3.781849000 | -3.555039000 | -1.863670000 | 6  | -2.405794000 | 1.474699000  | 1.882384000  |
| 6 | -2.881776000 | -1.850206000 | -0.920470000 | 1  | -1.693192000 | 2.288679000  | 2.078609000  |
| 6 | -1.860548000 | -1.724357000 | -2.037827000 | 6  | -3.673165000 | 2.062160000  | 1.261295000  |
| 1 | -1.686426000 | -0.680794000 | -2.302343000 | 1  | -4.395555000 | 1.279280000  | 1.007590000  |
| 1 | -2.237663000 | -2.232818000 | -2.936215000 | 1  | -3.471913000 | 2.653254000  | 0.362100000  |
| 8 | -0.568612000 | -2.241229000 | -1.705377000 | 1  | -4.155632000 | 2.728716000  | 1.985005000  |
| 6 | -0.497132000 | -3.663611000 | -1.718155000 | 6  | 0.891088000  | 0.466359000  | 2.606676000  |
| 1 | -0.788249000 | -4.061437000 | -2.700407000 | 1  | 0.751181000  | 1.551198000  | 2.618949000  |
| 1 | 0.544292000  | -3.928970000 | -1.523609000 | 1  | 1.604687000  | 0.229967000  | 1.813379000  |
| 1 | -1.135620000 | -4.114894000 | -0.947500000 | 1  | 1.351300000  | 0.180407000  | 3.559175000  |
| 6 | 2.367392000  | -2.295939000 | 1.093126000  | 6  | -2.546238000 | -1.160610000 | 0.520001000  |
| 6 | -0.008219000 | -1.509396000 | 1.568846000  | 6  | -2.550552000 | -2.304581000 | 1.336967000  |
| 6 | 1.341282000  | -1.246420000 | 1.505776000  | 1  | -1.862073000 | -2.391429000 | 2.168366000  |
| 1 | 1.731722000  | -0.441799000 | 2.132462000  | 6  | -3.444083000 | -3.354951000 | 1.123264000  |
| 1 | 1.808000000  | -0.539203000 | -0.643955000 | 1  | -3.418454000 | -4.222453000 | 1.775931000  |
| 1 | 1.900681000  | -2.950374000 | 0.345807000  | 6  | -4.371249000 | -3.274327000 | 0.089130000  |
| 1 | -0.408158000 | -2.428426000 | 1.148469000  | 1  | -5.084971000 | -4.075583000 | -0.077157000 |
| 1 | -0.632237000 | -1.028532000 | 2.314005000  | 6  | -4.378871000 | -2.147575000 | -0.731817000 |
| 6 | 0.614852000  | 1.172954000  | -1.389295000 | 1  | -5.112289000 | -2.075778000 | -1.530875000 |
| 6 | 1.710838000  | 0.178988000  | -1.549957000 | 6  | -3.472566000 | -1.094478000 | -0.553486000 |
| 1 | -0.114908000 | 1.148588000  | -2.196418000 | 6  | -3.509513000 | 0.040330000  | -1.560974000 |
| 1 | 2.714659000  | 0.607711000  | -1.542852000 | 1  | -3.190865000 | 0.982448000  | -1.112439000 |
| 1 | 1.564691000  | -0.499927000 | -2.389645000 | 1  | -4.538267000 | 0.178486000  | -1.925095000 |
| 6 | 0.956052000  | 2.549012000  | -0.952292000 | 8  | -2.628663000 | -0.156957000 | -2.665351000 |
| 6 | 0.300498000  | 3.655977000  | -1.522169000 | 6  | -3.103568000 | -1.061669000 | -3.655556000 |
| 1 | -0.436627000 | 3.493210000  | -2.304894000 | 1  | -4.094032000 | -0.757810000 | -4.024107000 |
| 6 | 1.945390000  | 2.796698000  | 0.020432000  | 1  | -2.389721000 | -1.022440000 | -4.481204000 |
| 1 | 2.498202000  | 1.968421000  | 0.458308000  | 1  | -3.162249000 | -2.092430000 | -3.282241000 |
| 6 | 2.252108000  | 4.097230000  | 0.415452000  | 6  | -0.481385000 | 2.592718000  | -0.845520000 |
| 6 | 0.610042000  | 4.957787000  | -1.130393000 | 6  | -0.746958000 | 2.418326000  | -2.328286000 |
| 6 | 1.582061000  | 5.183315000  | -0.154063000 | 1  | -0.331773000 | 3.244025000  | -2.919753000 |
| 1 | 0.099931000  | 5.796202000  | -1.595943000 | 1  | -0.257308000 | 1.505973000  | -2.737623000 |
| 1 | 3.021199000  | 4.264895000  | 1.164081000  | 1  | -1.297260000 | 3.046032000  | -0.288943000 |
| 1 | 1.826213000  | 6.196514000  | 0.150926000  | 6  | 0.337351000  | -1.038598000 | -1.726930000 |
| 6 | 2.680341000  | -3.167302000 | 2.337155000  | 6  | 1.276157000  | -0.956716000 | -0.729424000 |
| 1 | 3.401878000  | -3.947113000 | 2.074422000  | 1  | -0.592920000 | -1.579822000 | -1.588002000 |
| 1 | 3.116770000  | -2.565984000 | 3.142081000  | 1  | 0.599864000  | -0.822598000 | -2.760351000 |
| 1 | 1.771367000  | -3.642816000 | 2.719503000  | 1  | 1.035335000  | -1.422954000 | 0.224169000  |
| 6 | 3.649626000  | -1.731189000 | 0.495416000  | 1  | -1.807941000 | 2.308597000  | -2.547864000 |
| 6 | 4.137018000  | -2.225786000 | -0.721325000 | 6  | 0.859915000  | 3.042973000  | -0.438995000 |
| 1 | 3.586321000  | -3.007658000 | -1.240519000 | 6  | 1.981971000  | 2.869340000  | -1.279475000 |
| 6 | 4.390094000  | -0.738094000 | 1.155427000  | 1  | 1.853852000  | 2.508615000  | -2.294962000 |
| 1 | 4.056099000  | -0.355159000 | 2.117359000  | 6  | 1.069449000  | 3.635549000  | 0.829049000  |
| 6 | 5.572371000  | -0.242297000 | 0.603944000  | 1  | 0.211973000  | 3.822781000  | 1.471129000  |
| 6 | 5.322081000  | -1.735207000 | -1.274525000 | 6  | 2.337970000  | 4.011012000  | 1.244054000  |
| 6 | 6.040945000  | -0.737670000 | -0.615315000 | 6  | 3.261906000  | 3.233146000  | -0.851008000 |
| 1 | 5.683104000  | -2.135379000 | -2.217806000 | 6  | 3.445212000  | 3.797270000  | 0.409301000  |
| 1 | 6.133427000  | 0.523889000  | 1.131749000  | 1  | 4.109201000  | 3.098877000  | -1.517118000 |
| 1 | 6.963295000  | -0.354961000 | -1.042261000 | 1  | 2.473159000  | 4.482487000  | 2.213229000  |
|   |              |              |              | 1  | 4.437023000  | 4.096160000  | 0.735111000  |
|   |              |              |              | 6  | 2.764079000  | -0.658521000 | -0.903836000 |
|   |              |              |              | 1  | 3.004635000  | 0.257009000  | -0.347631000 |
|   |              |              |              | 6  | 3.192025000  | -0.447359000 | -2.366905000 |
|   |              |              |              | 1  | 3.026083000  | -1.350567000 | -2.962904000 |

S57

E + ZPE = -3168.561786

|   |             |              |              |
|---|-------------|--------------|--------------|
| 1 | 2.652184000 | 0.378816000  | -2.843481000 |
| 1 | 4.259916000 | -0.214786000 | -2.408924000 |
| 6 | 3.566575000 | -1.786399000 | -0.254582000 |
| 6 | 4.527632000 | -1.497618000 | 0.721706000  |
| 1 | 4.693217000 | -0.465442000 | 1.023675000  |
| 6 | 3.372312000 | -3.122713000 | -0.633076000 |
| 1 | 2.630387000 | -3.368796000 | -1.389488000 |
| 6 | 4.124692000 | -4.143149000 | -0.051614000 |
| 6 | 5.283609000 | -2.516894000 | 1.303911000  |
| 6 | 5.083009000 | -3.842868000 | 0.919041000  |
| 1 | 6.028898000 | -2.273706000 | 2.056115000  |
| 1 | 3.964329000 | -5.173094000 | -0.358130000 |
| 1 | 5.670230000 | -4.637480000 | 1.370200000  |

**S58**

E + ZPE = -3168.575695

|    |              |              |              |
|----|--------------|--------------|--------------|
| 28 | -0.133605000 | 0.984398000  | -0.254117000 |
| 15 | 1.205247000  | -0.682011000 | -0.824991000 |
| 6  | 0.202295000  | -2.246981000 | -1.102408000 |
| 1  | -0.096684000 | -2.668152000 | -0.138619000 |
| 6  | 1.105558000  | -3.231069000 | -1.900242000 |
| 1  | 1.404479000  | -4.079011000 | -1.276206000 |
| 1  | 0.518155000  | -3.647983000 | -2.725042000 |
| 6  | 2.355104000  | -2.502245000 | -2.440281000 |
| 1  | 2.608656000  | -2.835026000 | -3.452971000 |
| 1  | 3.223587000  | -2.731386000 | -1.811851000 |
| 6  | 2.154736000  | -0.968821000 | -2.437085000 |
| 1  | 1.437598000  | -0.689145000 | -3.220286000 |
| 6  | 3.488843000  | -0.266099000 | -2.702137000 |
| 1  | 4.215501000  | -0.478691000 | -1.910963000 |
| 1  | 3.402439000  | 0.816629000  | -2.813266000 |
| 1  | 3.908068000  | -0.651820000 | -3.638508000 |
| 6  | -1.084737000 | -1.919235000 | -1.883730000 |
| 1  | -0.864179000 | -1.483381000 | -2.865036000 |
| 1  | -1.741709000 | -1.236765000 | -1.339249000 |
| 1  | -1.645701000 | -2.844345000 | -2.053022000 |
| 6  | 2.444408000  | -1.017438000 | 0.508038000  |
| 6  | 2.447744000  | -2.252540000 | 1.175281000  |
| 1  | 1.732109000  | -3.021920000 | 0.906808000  |
| 6  | 3.371789000  | -2.531124000 | 2.184143000  |
| 1  | 3.352334000  | -3.496638000 | 2.680914000  |
| 6  | 4.321787000  | -1.576172000 | 2.534369000  |
| 1  | 5.055829000  | -1.786778000 | 3.306324000  |
| 6  | 4.330312000  | -0.344568000 | 1.878671000  |
| 1  | 5.084958000  | 0.393163000  | 2.139674000  |
| 6  | 3.398117000  | -0.033380000 | 0.880931000  |
| 6  | 3.446452000  | 1.355135000  | 0.259286000  |
| 1  | 3.093775000  | 1.337113000  | -0.770423000 |
| 1  | 4.485345000  | 1.715758000  | 0.248142000  |
| 8  | 2.612537000  | 2.320171000  | 0.903456000  |
| 6  | 3.146305000  | 2.854733000  | 2.109317000  |
| 1  | 4.140893000  | 3.291263000  | 1.939463000  |
| 1  | 2.463039000  | 3.643066000  | 2.432762000  |
| 1  | 3.219159000  | 2.097747000  | 2.901513000  |
| 6  | -0.167377000 | 1.741723000  | -2.047260000 |
| 6  | 1.017774000  | 2.598381000  | -2.476052000 |
| 1  | 0.682089000  | 3.365090000  | -3.186911000 |
| 1  | 1.508803000  | 3.112241000  | -1.644124000 |
| 1  | -0.496284000 | 1.067123000  | -2.840766000 |
| 6  | -0.059557000 | 0.974360000  | 1.858966000  |
| 6  | -0.910328000 | -0.050200000 | 1.549415000  |
| 1  | 0.995911000  | 0.793914000  | 2.023949000  |

|   |              |              |              |
|---|--------------|--------------|--------------|
| 1 | -0.443564000 | 1.923059000  | 2.220326000  |
| 1 | -0.477688000 | -1.044008000 | 1.454943000  |
| 1 | 1.770630000  | 1.996134000  | -2.987947000 |
| 6 | -1.275409000 | 2.374706000  | -1.347218000 |
| 6 | -0.966803000 | 3.113911000  | -0.174142000 |
| 1 | 0.057016000  | 3.423271000  | 0.024587000  |
| 6 | -2.646157000 | 2.152219000  | -1.665067000 |
| 1 | -2.891079000 | 1.566989000  | -2.547097000 |
| 6 | -3.644825000 | 2.729104000  | -0.906203000 |
| 6 | -2.002650000 | 3.680571000  | 0.599138000  |
| 6 | -3.325172000 | 3.496738000  | 0.235752000  |
| 1 | -1.754835000 | 4.289601000  | 1.463757000  |
| 1 | -4.684650000 | 2.602953000  | -1.194470000 |
| 1 | -4.120393000 | 3.954952000  | 0.816328000  |
| 6 | -2.417923000 | -0.015518000 | 1.753748000  |
| 1 | -2.810891000 | 0.922482000  | 1.345620000  |
| 6 | -2.712075000 | -0.002751000 | 3.278911000  |
| 1 | -2.312513000 | -0.896744000 | 3.768900000  |
| 1 | -2.264501000 | 0.875498000  | 3.754912000  |
| 1 | -3.793123000 | 0.019265000  | 3.448391000  |
| 6 | -3.144190000 | -1.175804000 | 1.084011000  |
| 6 | -4.213228000 | -0.939943000 | 0.211179000  |
| 1 | -4.504173000 | 0.083650000  | -0.009386000 |
| 6 | -2.802036000 | -2.506643000 | 1.370409000  |
| 1 | -2.000045000 | -2.723215000 | 2.073324000  |
| 6 | -3.496272000 | -3.567348000 | 0.787391000  |
| 6 | -4.913414000 | -1.998510000 | -0.372596000 |
| 6 | -4.554580000 | -3.316332000 | -0.089378000 |
| 1 | -5.742399000 | -1.791784000 | -1.043905000 |
| 1 | -3.220472000 | -4.590352000 | 1.028741000  |
| 1 | -5.100512000 | -4.141333000 | -0.537782000 |

**S59**

E + ZPE = -3168.567103

|    |              |              |              |
|----|--------------|--------------|--------------|
| 28 | -1.098874000 | 1.051511000  | -0.343130000 |
| 15 | -1.880244000 | -0.871684000 | 0.339747000  |
| 6  | -2.211446000 | -1.061423000 | 2.181976000  |
| 1  | -1.280554000 | -1.392088000 | 2.653137000  |
| 6  | -3.333325000 | -2.140663000 | 2.329165000  |
| 1  | -3.004822000 | -2.957085000 | 2.980700000  |
| 1  | -4.191024000 | -1.676205000 | 2.828004000  |
| 6  | -3.767548000 | -2.680238000 | 0.952212000  |
| 1  | -4.815734000 | -3.000607000 | 0.963929000  |
| 1  | -3.175804000 | -3.562607000 | 0.679966000  |
| 6  | -3.555943000 | -1.592624000 | -0.119415000 |
| 1  | -4.262464000 | -0.769851000 | 0.059235000  |
| 6  | -3.748216000 | -2.124693000 | -1.540997000 |
| 1  | -3.019502000 | -2.907551000 | -1.776861000 |
| 1  | -3.673810000 | -1.341015000 | -2.300637000 |
| 1  | -4.745751000 | -2.568902000 | -1.632290000 |
| 6  | -2.637692000 | 0.262424000  | 2.840028000  |
| 1  | -3.572149000 | 0.638833000  | 2.409150000  |
| 1  | -1.883218000 | 1.047494000  | 2.746278000  |
| 1  | -2.818908000 | 0.093927000  | 3.907595000  |
| 6  | -0.679216000 | -2.200212000 | -0.128505000 |
| 6  | -0.322311000 | -3.224982000 | 0.759766000  |
| 1  | -0.750657000 | -3.262312000 | 1.755457000  |
| 6  | 0.578469000  | -4.226986000 | 0.389817000  |
| 1  | 0.831379000  | -5.010692000 | 1.097718000  |
| 6  | 1.139874000  | -4.219910000 | -0.884019000 |
| 1  | 1.836444000  | -4.997227000 | -1.183335000 |
| 6  | 0.796358000  | -3.205063000 | -1.779397000 |

|   |              |              |              |
|---|--------------|--------------|--------------|
| 1 | 1.226938000  | -3.202937000 | -2.777832000 |
| 6 | -0.101008000 | -2.192770000 | -1.422988000 |
| 6 | -0.430383000 | -1.119071000 | -2.438230000 |
| 1 | -1.508051000 | -0.985615000 | -2.550164000 |
| 1 | -0.029128000 | -1.392008000 | -3.420364000 |
| 8 | 0.075725000  | 0.182828000  | -2.070113000 |
| 6 | 1.389612000  | 0.449714000  | -2.581122000 |
| 1 | 1.398150000  | 0.331397000  | -3.671109000 |
| 1 | 1.623892000  | 1.485020000  | -2.331888000 |
| 1 | 2.139750000  | -0.210159000 | -2.132349000 |
| 6 | -2.813521000 | 1.903233000  | -0.494866000 |
| 6 | -3.541410000 | 1.745736000  | -1.821510000 |
| 1 | -4.321773000 | 2.515134000  | -1.900537000 |
| 1 | -2.888173000 | 1.856798000  | -2.692331000 |
| 1 | -3.494206000 | 1.784432000  | 0.351086000  |
| 6 | 0.689519000  | 1.303242000  | 1.519493000  |
| 6 | 1.722457000  | 0.887106000  | 0.764613000  |
| 1 | 0.319167000  | 2.319802000  | 1.447439000  |
| 1 | 0.339991000  | 0.722718000  | 2.367228000  |
| 1 | -4.038062000 | 0.774682000  | -1.897875000 |
| 6 | -1.862823000 | 2.988489000  | -0.306407000 |
| 6 | -0.775141000 | 3.046315000  | -1.224329000 |
| 1 | -0.865676000 | 2.600592000  | -2.210868000 |
| 6 | -1.832360000 | 3.834142000  | 0.840040000  |
| 1 | -2.659085000 | 3.792596000  | 1.543869000  |
| 6 | -0.793351000 | 4.721077000  | 1.030685000  |
| 6 | 0.283193000  | 3.960685000  | -1.001304000 |
| 6 | 0.281400000  | 4.779236000  | 0.111744000  |
| 1 | 1.081955000  | 4.043458000  | -1.733241000 |
| 1 | -0.801845000 | 5.387861000  | 1.888229000  |
| 1 | 1.087133000  | 5.489643000  | 0.270657000  |
| 1 | 2.089850000  | 1.560690000  | -0.007848000 |
| 6 | 2.497860000  | -0.409232000 | 0.910657000  |
| 1 | 2.094478000  | -1.119127000 | 0.174183000  |
| 6 | 2.349903000  | -1.058410000 | 2.301100000  |
| 1 | 2.719338000  | -0.390936000 | 3.086535000  |
| 1 | 1.306835000  | -1.308000000 | 2.523590000  |
| 1 | 2.929816000  | -1.984742000 | 2.344093000  |
| 6 | 3.968244000  | -0.196881000 | 0.561320000  |
| 6 | 4.623739000  | -1.076464000 | -0.309614000 |
| 1 | 4.071598000  | -1.906594000 | -0.746639000 |
| 6 | 4.700647000  | 0.856217000  | 1.127396000  |
| 1 | 4.211344000  | 1.546736000  | 1.811061000  |
| 6 | 6.052480000  | 1.026295000  | 0.827253000  |
| 6 | 5.976861000  | -0.910180000 | -0.611049000 |
| 6 | 6.694475000  | 0.143575000  | -0.043930000 |
| 1 | 6.469445000  | -1.603596000 | -1.287218000 |
| 1 | 6.605614000  | 1.846954000  | 1.275692000  |
| 1 | 7.747228000  | 0.275310000  | -0.276645000 |

.....
